1 **IFN $\gamma$  induces epigenetic programming of human T-bet<sup>hi</sup> B cells and promotes TLR7/8**  
2 **and IL-21 induced differentiation**  
3

4 Esther Zumaquero<sup>1</sup>, Sara L. Stone<sup>1</sup>, Christopher D. Schare<sup>2</sup>, Scott A. Jenks<sup>3</sup>, Anoma Nellore<sup>4</sup>, Betty  
5 Mousseau<sup>1</sup>, Antonio Rosal-Vela<sup>1</sup>, Davide Botta<sup>1</sup>, John E. Bradley<sup>5</sup>, Wojciech Wojciechowski<sup>6</sup>, Travis  
6 Ptacek<sup>1,7</sup>, Maria I. Danila<sup>5</sup>, Jeffrey C. Edberg<sup>5</sup>, S. Louis Bridges, Jr.<sup>5</sup>, Robert P. Kimberly<sup>5</sup>, W. Winn  
7 Chatham<sup>5</sup>, Trenton R. Schoeb<sup>8</sup>, Alexander Rosenberg<sup>1</sup>, Jeremy M. Boss<sup>2</sup>, Ignacio Sanz<sup>3</sup> and Frances  
8 E. Lund<sup>1\*</sup>  
9

10 <sup>1</sup>Dept of Microbiology, <sup>4</sup>Dept. of Medicine, Division of Infectious Disease, <sup>5</sup>Dept. of Medicine, Division of  
11 Clinical Immunology and Rheumatology, <sup>7</sup>Center for Clinical and Translational Science, informatics  
12 group and <sup>8</sup>Dept. of Genetics and Animal Resources Program at The University of Alabama at  
13 Birmingham, Birmingham, AL 35294 USA

14 <sup>2</sup>Dept. of Microbiology and Immunology and <sup>3</sup>Department of Medicine, Division of Rheumatology Emory  
15 University, Atlanta, GA 30322, USA

16 <sup>6</sup>Center for Pediatric Biomedical Research, Flow Cytometry Shared Resource Laboratory, University of  
17 Rochester School of Medicine and Dentistry, Rochester, NY 14642, USA  
18

19 \*Lead Contact and to whom correspondence should be addressed [flund@uab.edu](mailto:flund@uab.edu)

20 ORCID: <https://orcid.org/0000-0003-3083-1246>

21 Mail address: Frances E. Lund, PhD

22 Charles H. McCauley Professor and Chair

23 Dept of Microbiology

24 University of Alabama at Birmingham (UAB)

25 276 BBRB Box 11

26 1720 2nd Avenue South

27 Birmingham AL 35294-2170  
28

29 SHORT RUNNING TITLE: Regulation of human plasma cell development by IFN $\gamma$   
30  
31  
32

33 **Abstract**

34

35 Although B cells expressing the IFN $\gamma$ R or the IFN $\gamma$ -inducible transcription factor T-bet drive autoimmunity  
36 in Systemic Lupus Erythematosus (SLE)-prone mouse models, the role for IFN $\gamma$  signaling in human  
37 antibody responses is unknown. We show that elevated levels of IFN $\gamma$  in SLE patients correlate with  
38 expansion of the T-bet expressing IgD<sup>neg</sup>CD27<sup>neg</sup>CD11c<sup>+</sup>CXCR5<sup>neg</sup> (DN2) pre-antibody secreting cell  
39 (pre-ASC) subset. We demonstrate that naïve B cells form T-bet<sup>hi</sup> pre-ASCs following stimulation with  
40 either Th1 cells or with IFN $\gamma$ , IL-2, anti-Ig and TLR7/8 ligand and that IL-21 dependent ASC formation is  
41 significantly enhanced by IFN $\gamma$  or IFN $\gamma$ -producing T cells. IFN $\gamma$  promotes ASC development by  
42 synergizing with IL-2 and TLR7/8 ligands to induce genome-wide epigenetic reprogramming of B cells,  
43 which results in increased chromatin accessibility surrounding IRF4 and BLIMP1 binding motifs and  
44 epigenetic remodeling of *IL21R* and *PRDM1* loci. Finally, we show that IFN $\gamma$  signals poise B cells to  
45 differentiate by increasing their responsiveness to IL-21.

46

47 **Keywords:** Systemic Lupus Erythematosus, antibody secreting cells, T-bet, human B cell  
48 differentiation, IFN $\gamma$ , IL-21

## 49 Introduction

50 Systemic Lupus Erythematosus (SLE) is characterized by progressive dysregulation of the innate and  
51 adaptive arms of the immune system, which ultimately leads to loss of immune tolerance in B and T  
52 lymphocytes and the production of autoantibodies (Abs) by Ab-secreting B cells (ASCs) (1). The hallmark  
53 SLE autoAbs recognize nuclear proteins and nucleic acids (2), which are also ligands for TLR7 and TLR9  
54 that are expressed by innate immune cells and B cells (3). SLE autoAbs bound to their autoAgs form  
55 immune complexes, which are responsible for many of the clinical manifestations of SLE, particularly  
56 those associated with organ damage (2). Consistent with the important role for B cells and ASCs in SLE  
57 pathogenesis (4), the only new drug approved to treat SLE in decades, Belimumab, targets B cells.

58  
59 Inflammatory cytokines and chemokines also contribute to SLE pathogenesis (5). SLE patient PBMCs  
60 often exhibit a type I interferon (IFN) transcriptional signature and systemic IFN $\alpha$  is elevated in many  
61 patients (6). It is less well appreciated that IFN $\gamma$  is also increased in some SLE patients (7-9) and that a  
62 distinct IFN $\gamma$  transcription signature can be detected in PBMCs from a portion of SLE patients (10, 11).  
63 Interestingly, elevated serum IFN $\gamma$  can be observed years before IFN $\alpha$  or autoAbs are detected in SLE  
64 patients and much earlier than clinical disease (12, 13). Consistent with these observations, B cells from  
65 SLE patients can exhibit signs of prior IFN $\gamma$  exposure. For example, CXCR3 and T-bet, two IFN $\gamma$ -inducible  
66 proteins (14), are more highly expressed by circulating B cells from SLE patients compared to healthy  
67 controls (8, 15-19). Moreover, data from mouse SLE models show that clinical disease is dependent on  
68 B cell-specific expression of the IFN $\gamma$ R and the IFN $\gamma$ - induced transcription factors STAT1 (20-22) and T-  
69 bet in some (23, 24) but not all (21, 25) models. Taken together, these data suggest that IFN $\gamma$ -driven  
70 inflammation may contribute to SLE B cell-driven pathophysiology.

71  
72 Two populations of circulating B cells present in SLE patients, namely the CD11c<sup>hi</sup> and IgD<sup>neg</sup>CD27<sup>neg</sup>  
73 subsets, are reported to express T-bet (18, 19). CD11c<sup>hi</sup> B cells, which are called age associated B cells  
74 (ABCs) (26, 27), and the IgD<sup>neg</sup>CD27<sup>neg</sup> double negative (B<sub>DN</sub>) B cells, which are often referred to as  
75 “atypical” memory B cells (28, 29), are present in low numbers in the blood or tonsils of healthy individuals  
76 (30) and are reported to be expanded in chronically infected (29, 31-33), aging (27, 34, 35) and  
77 autoimmune individuals (26, 27), including patients with SLE (28). The CD11c<sup>hi</sup> population found in SLE  
78 patients is heterogeneous and contains CD11c-expressing IgD<sup>neg</sup>CD27<sup>+</sup> switched memory (B<sub>SW</sub>) cells,  
79 IgD<sup>neg</sup>CD27<sup>neg</sup> naïve (B<sub>N</sub>) cells and B<sub>DN</sub> cells (18). The B<sub>DN</sub> population is also heterogeneous and can be  
80 subdivided using CD11c and CXCR5 into DN1 (CD11c<sup>lo</sup>CXCR5<sup>+</sup>) and DN2 (CD11c<sup>hi</sup>CXCR5<sup>neg</sup>)  
81 populations (19).

82

83 Despite extensive data showing that these overlapping populations of CD11c<sup>hi</sup> B cells and B<sub>DN</sub> cells are  
84 expanded in a number of human diseases (36), our understanding regarding their origin and function is  
85 incomplete. Although initial studies examining B<sub>DN</sub> cells from malaria or HIV-infected individuals  
86 described these B cells as anergic (31, 37-39), more recent studies reported that the CD11c-expressing  
87 IgD<sup>neg</sup>CD27<sup>+</sup>CD21<sup>lo</sup> activated B<sub>SW</sub> cells from influenza vaccinated humans (40) and HIV infected patients  
88 (33), as well as the CD11c<sup>hi</sup> cells from SLE patients (18) and the CD11c<sup>hi</sup> DN2 cells from SLE patients  
89 (19) possess phenotypic and molecular characteristics of pre-ASCs. Both the CD11c<sup>hi</sup> B cells and the  
90 more narrowly defined DN2 subset from SLE patients differentiated into ASCs following stimulation (18,  
91 19). Moreover, the T-bet<sup>hi</sup> DN2 subset from SLE patients can produce autoAbs (19), suggesting that  
92 these cells can potentially contribute to disease.

93  
94 Given the fact that T-bet<sup>hi</sup> DN2 pre-ASCs produce autoAbs and correlate with disease severity in SLE  
95 patients (19), we set out to identify the signals that control formation of this population and their  
96 differentiation into ASCs. Consistent with the fact that SLE DN2 cells express high levels of T-bet, we  
97 show that expansion of the DN2 cells in SLE patients correlates with systemic concentrations of IFN $\gamma$  and  
98 IFN $\gamma$ -induced cytokines. We further demonstrate that activation of B<sub>N</sub> cells with IFN $\gamma$ -producing T cells or  
99 IFN $\gamma$  + TLR7/8 and BCR ligands induces formation of a T-bet<sup>hi</sup> pre-ASC population that is similar to the  
100 SLE T-bet<sup>hi</sup> DN2 subset. Importantly, we show that IFN $\gamma$  signals are not only required for formation of the  
101 pre-ASC population but also greatly augment ASC formation, at least in part by increasing IL-21R  
102 expression and responsiveness of the cells to IL-21. IFN $\gamma$  appears to enhance ASC differentiation by  
103 synergizing with BCR, IL-2 and TLR7/8 signals to promote global epigenetic changes, some of which  
104 result in greatly increased chromatin accessibility surrounding binding motifs for two key ASC  
105 commitment transcription factors, BLIMP1 and IRF4. Finally, and consistent with our hypothesis that IFN $\gamma$   
106 signals poise B cells to differentiate, we identified IFN $\gamma$ -dependent differentially accessible regions  
107 (DARs) within the *IL21R* and *PRDM1* (BLIMP1) loci. These DARs are also present in the SLE patient  
108 DN2 cells, suggesting that IFN $\gamma$  signals might contribute to the epigenetic changes seen in the SLE T-  
109 bet<sup>hi</sup> DN2 pre-ASC population and may be critical for the formation of these likely pathogenic pre-ASCs.  
110

## 111 RESULTS

112

113 **T-bet is highly expressed by expanded ASC precursors in SLE patients.** Recent studies (18, 19)  
114 identified and characterized B cells that are expanded in a fraction of SLE patients, including an  
115 IgD<sup>neg</sup>CD27<sup>neg</sup> B cell subset (referred to as double negative B cells or B<sub>DN</sub> cells) and a CD19<sup>hi</sup>CD11c<sup>hi</sup>  
116 subset (referred to as age associated B cells or ABCs). These two populations, which are heterogeneous  
117 and overlapping (18, 19), were reported to contain B cells expressing the IFN $\gamma$ -induced transcription  
118 factor, T-bet. This was of interest to us as we (Figure 1-figure supplement 1) and others (23, 24) showed  
119 that B cell intrinsic expression of T-bet is required for the development of autoAb-mediated immunity in  
120 SLE mouse models. Consistent with this, our studies in SLE patients (19) indicated that a subpopulation  
121 of cells within the B<sub>DN</sub> population, namely the CXCR5<sup>neg</sup>CD11c<sup>hi</sup> (DN2) subset, exhibited characteristics  
122 of pre-antibody secreting cells (pre-ASCs). We further showed that expansion of this subpopulation  
123 correlated strongly with disease activity in SLE patients (19). Given these findings, we hypothesized that  
124 T-bet would be expressed by this expanded population of pre-ASCs in the SLE patients and that  
125 expansion of these T-bet expressing B cells in SLE patients would correlate with autoAb titers in these  
126 individuals. To test this hypothesis, we first measured T-bet levels in total B cells (non-ASCs),  
127 IgD<sup>+</sup>CD27<sup>neg</sup> naïve (B<sub>N</sub>), IgD<sup>neg</sup>CD27<sup>+</sup> memory (B<sub>SW</sub>), IgD<sup>+</sup>CD27<sup>+</sup> unswitched memory (B<sub>U</sub>) and B<sub>DN</sub> cell  
128 subsets isolated from peripheral blood of healthy donors (HD) and SLE patients (Fig. 1a). We observed  
129 an expansion of T-bet<sup>hi</sup> B cells within the total B cell compartment as well as in all SLE B cell subsets  
130 compared to HD controls (Fig. 1b). However, T-bet<sup>hi</sup> B cells were particularly prevalent within the SLE  
131 B<sub>DN</sub> compartment and correlated precisely with the frequency of B<sub>DN</sub> cells present in these patients (Fig.  
132 1c). Since the B<sub>DN</sub> population is heterogeneous (19) and can be subdivided into memory CXCR5<sup>+</sup>CD11c<sup>lo</sup>  
133 B<sub>DN</sub> cells (DN1 subset) and the effector CD11c<sup>hi</sup>CXCR5<sup>neg</sup> DN2 subset (Fig. 1d), we asked whether the  
134 T-bet was specifically expressed by the DN1 or DN2 subset. We found that the T-bet<sup>hi</sup> B cells were  
135 exclusively contained within the CD11c<sup>hi</sup>CXCR5<sup>neg</sup> DN2 subpopulation (Fig. 1e). Moreover, consistent  
136 with what has been reported for the SLE DN2 cells (19), the SLE T-bet<sup>hi</sup> B cells were uniformly  
137 CD19<sup>hi</sup>FcRL5<sup>+</sup>CD23<sup>neg</sup> (Fig. 1f). These data therefore indicated that the T-bet<sup>hi</sup> B<sub>DN</sub> subset and the  
138 previously described DN2 pre-ASC subset represent equivalent populations in SLE patients. Consistent  
139 with this conclusion, two transcription factors that are required for ASC differentiation (41), Blimp1 and  
140 IRF4, are expressed at intermediate levels in T-bet<sup>hi</sup> B<sub>DN</sub> cells from SLE patients relative to CD27<sup>hi</sup>CD38<sup>hi</sup>  
141 ASCs and T-bet<sup>lo</sup> B cells (Fig. 1g-i). In addition, we observed a strong positive correlation between the  
142 frequency of T-bet<sup>hi</sup> B<sub>DN</sub> cells and anti-Smith autoAb levels in our cohort of SLE patients (Fig. 1j). Thus,  
143 the T-bet<sup>hi</sup> B<sub>DN</sub> subset, which we now refer to as the SLE T-bet<sup>hi</sup> DN2 subset, exhibits phenotypic  
144 characteristics of pre-ASCs and are most expanded in patients with the highest autoAb titers.

145

146 **Expansion of T-bet<sup>hi</sup> DN2 cells correlates with systemic IFN $\gamma$  levels in SLE patients.** Since we

147 previously showed that T-bet expression is induced by IFN $\gamma$  in B cells (42), we hypothesized that the  
148 expansion of the T-bet<sup>hi</sup> DN2 pre-ASC subset in SLE patients would be associated with IFN $\gamma$  levels in  
149 these patients. To test this possibility, we measured 15 cytokines in plasma from the SLE patients.  
150 Consistent with our hypothesis, we observed a significant positive correlation between IFN $\gamma$ , as well as  
151 the IFN $\gamma$ -induced cytokines CXCL10, IL-6 and TNF $\alpha$ , and the frequency of T-bet<sup>hi</sup> DN2 cells in these  
152 individuals (Fig. 1k-l). These data therefore indicated that the T-bet<sup>hi</sup> DN2 pre-ASC population is most  
153 expanded in SLE patients who also exhibit elevated expression of IFN $\gamma$  and IFN $\gamma$ -driven inflammatory  
154 cytokines.

155

156 **IFN $\gamma$ -producing Th1 cells promote development of T-bet<sup>hi</sup> B<sub>DN</sub> cells.** Recent experiments from our  
157 lab revealed that mouse B cells that are activated in the presence of IFN $\gamma$ -producing T cells differentiate  
158 into ASCs in an IFN $\gamma$  and T-bet dependent fashion (43). Since human T-bet<sup>hi</sup> DN2 pre-ASCs are  
159 expanded in SLE patients with higher systemic levels of IFN $\gamma$ , we predicted that the IFN $\gamma$  might drive the  
160 development of the human T-bet<sup>hi</sup> DN2 pre-ASC population. To begin testing this prediction, we  
161 developed an *in vitro* B cell/T cell mixed lymphocyte reaction (MLR) paired co-culture system (Fig. 2a)  
162 containing B<sub>N</sub> cells (Fig. 2b) purified from the peripheral blood or tonsil of one HD and highly polarized  
163 human Th1 and Th2 effectors (44), which were generated *in vitro* using purified naïve peripheral blood T  
164 cells isolated from a second unrelated HD. The Th1 cells expressed T-bet (Fig. 2c) and produced IFN $\gamma$   
165 and IL-8 following restimulation (Fig. 2d) while Th2 cells expressed GATA-3 (Fig. 2c) and produced  
166 elevated levels of IL-4, IL-5, and IL-13 (Fig. 2d). Since neither the Th1 nor Th2 cells expressed Bcl6 (not  
167 shown) or produced IL-21 following restimulation (Fig. 2e), we added IL-21 to the co-cultures to ensure  
168 optimal B<sub>N</sub> activation (45, 46) and included IL-2 to enhance the survival of the T effectors (47). After 6  
169 days in culture, both B cells and ASCs were detected in both cultures (Fig. 2f). Few of the HD B cells  
170 activated with IL-4 producing Th2 cells upregulated T-bet (<3%), while more than half of B cells activated  
171 in the presence of IFN $\gamma$ -producing Th1 cells expressed T-bet (Fig. 2f). Approximately 50% of the T-bet<sup>hi</sup>  
172 B cells present in the Be1 cultures downregulated IgD and these cells were  
173 CD27<sup>neg</sup>CD19<sup>hi</sup>CD11c<sup>+</sup>FcRL5<sup>+</sup>CD23<sup>neg</sup> (Fig. 2g). Therefore, activation of B<sub>N</sub> cells with Th1 cells and IL-  
174 21 + IL-2 resulted in the formation of a T-bet<sup>hi</sup> B<sub>DN</sub> population that was phenotypically similar to the SLE  
175 patient-derived T-bet<sup>hi</sup> DN2 cells.

176

177 **Differentiation of naïve B cells into ASCs is enhanced in the presence of Th1 cells.** Given that the  
178 Th1-induced T-bet<sup>hi</sup> B<sub>DN</sub> cells were phenotypically related to the previously characterized SLE patient T-  
179 bet<sup>hi</sup> DN2 pre-ASCs, we predicted that the *in vitro* generated T-bet<sup>hi</sup> B<sub>DN</sub> subset might represent a pre-  
180 ASC population. To test this hypothesis, we first enumerated CD38<sup>hi</sup>CD27<sup>hi</sup> ASCs in day 6 Be1 and Be2  
181 co-cultures. Although we detected ASCs in both co-cultures (Fig. 3a), we always found more ASCs in

182 the Be1 co-cultures (Fig. 3a), even across multiple independent experiments using B<sub>N</sub> and T effectors  
183 from different HD pairs (Fig. 3b). To address whether the increased ASC formation observed in the Be1  
184 co-cultures was limited to isotype switched or unswitched B cells, we measured the frequency of IgM and  
185 IgG-producing (Fig. 3c-d with isotype gating shown in Figure 3-figure supplement 1k) ASCs across  
186 multiple paired Be1 and Be2 co-cultures. Again, we found that ASCs, regardless of isotype, were greatly  
187 enriched in the Be1 co-cultures (Fig. 3c-d). These data therefore indicated that, while both Be1 and Be2  
188 co-cultures promote ASC formation, Be1 co-culture conditions appear to be highly conducive to ASC  
189 development.

190  
191 To determine whether the increased ASC formation in the Be1 cultures was due to increased proliferation,  
192 we set up paired Be1 and Be2 co-cultures with Cell Trace Violet (CTV)-labeled B<sub>N</sub> cells and monitored  
193 proliferation and ASC formation in the cultures. As shown in Figure 3e, the B cells proliferated in both  
194 cultures, with a similar frequency of B cells represented in each cell division. However, despite equivalent  
195 rates of proliferation, the frequency of CD27<sup>hi</sup>CD38<sup>hi</sup> ASCs was ~20-fold higher in the Be1 co-culture  
196 compared to the paired Be2 co-culture (Fig. 3f). In fact, 40% of the B cells that had divided at least 5  
197 times in the Be1 cultures were ASCs while <2% of the B cells that had divided ≥5 times were ASCs in  
198 the Be2 cultures (Fig. 3g). The same analysis was performed in an additional four independent paired  
199 Be1 and Be2 co-cultures (Fig. 3h-j and Figure 3-figure supplement 1a-i) and, while replicative response  
200 in each of the independent allo co-cultures was unique, we always observed equivalent proliferative rates  
201 between the Be1 and Be2 cells in the co-cultures and enhanced ASC formation in the Be1 cultures (mean  
202 18.35-fold and median 11.2-fold increase in percentage of ASCs in Be1 co-cultures). Importantly, the  
203 ASCs that were found in each co-culture exhibited the same proliferative history with 89% of the ASCs  
204 present in Be1 cultures having undergone ≥5 divisions and 88% of the ASCs present in Be2 cultures  
205 having divided ≥5 times (Figure 3-figure supplement 1j). Therefore, we conclude that the increased ASC  
206 formation in Be1 cultures compared to the Be2 cultures is not due to intrinsic differences in the  
207 proliferative rates of the cells in each culture but rather that a higher proportion of the Be1 cells at each  
208 cell division make the commitment to the ASC lineage.

209  
210 **T-bet<sup>hi</sup> B<sub>DN</sub> cells induced with Th1 cells and IL-21 are pre-ASCs.** Given the phenotypic similarities  
211 between the *in vitro* induced T-bet<sup>hi</sup> B<sub>DN</sub> cells and T-bet<sup>hi</sup> DN2 cells from SLE patients and the fact that  
212 the *in vitro* cultures containing T-bet<sup>hi</sup> B<sub>DN</sub> cells also efficiently formed ASCs, we predicted that the Tbet<sup>hi</sup>  
213 B<sub>DN</sub> cells found in the Th1/B<sub>N</sub> co-cultures were likely to be pre-ASCs. To test this, we first asked whether  
214 the *in vitro* generated Th1-induced T-bet<sup>hi</sup> B<sub>DN</sub> cells were transcriptionally related to T-bet<sup>hi</sup> DN2 pre-ASCs  
215 from SLE patients. We therefore sort-purified IgD<sup>neg</sup>CD27<sup>neg</sup> B<sub>DN</sub> cells (Fig. 4a) from three independent  
216 paired day 6 Be1 and Be2 co-cultures and performed RNA-seq analysis. We identified 427 differentially  
217 expressed genes (DEGs) between the B<sub>DN</sub> cells from the Be1 and Be2 co-cultures (Fig. 4b,

218 [Supplementary File 1](#)). Consistent with our data showing that T-bet was selectively upregulated in the B  
219 cells from Be1 co-cultures, we observed significantly higher levels of *TBX21* mRNA in the *in vitro* induced  
220 B<sub>DN</sub> Be1 cells compared to B<sub>DN</sub> Be2 cells ([Fig. 4c](#)). Next, we used Gene Set Enrichment Analysis (GSEA)  
221 to compare the transcriptomes of the *in vitro* generated B<sub>DN</sub> cells isolated from the Be1 and Be2 cultures  
222 with the transcriptome of the T-bet<sup>hi</sup> DN2 population isolated from SLE patients ((19), [Supplementary File](#)  
223 [2](#)). Consistent with our phenotyping data, the transcriptome of the T-bet expressing B<sub>DN</sub> Be1 cell subset  
224 was highly enriched relative to the B<sub>DN</sub> Be2 cells for genes that are differentially upregulated in the SLE-  
225 derived T-bet<sup>hi</sup> DN2 subset ([Fig. 4d](#)). Similarly, the transcriptome of the *in vitro* generated T-bet<sup>hi</sup> B<sub>DN</sub> Be1  
226 cells was enriched in genes that are upregulated in the CD11c<sup>+</sup> T-bet expressing ABCs (48) isolated from  
227 aged mice ([Fig. 4e-f](#)).

228  
229 Next, we used GSEA to compare the transcriptional profile of the *in vitro* generated B<sub>DN</sub> cells isolated  
230 from the Be1 and Be2 cultures with curated ASC transcriptome datasets (49, 50). Interestingly, the  
231 transcriptome of the *in vitro*-induced B<sub>DN</sub> Be1 population was significantly enriched in expression of genes  
232 that are upregulated in ASCs compared to B<sub>N</sub> cells ([Fig. 4g](#)), mature B cells ([Fig. 4h](#)) and B<sub>SW</sub> cells ([Fig.](#)  
233 [4i](#)). In addition, genes that are direct targets of IRF4 and upregulated in ASCs (51) were significantly  
234 enriched in the *in vitro* generated Be1 B<sub>DN</sub> cells relative to the Be2 B<sub>DN</sub> cells ([Fig. 4j](#)). Consistent with this  
235 finding, we observed that the Be1 T-bet<sup>hi</sup> B<sub>DN</sub> cells express intermediate levels of IRF4, when compared  
236 to the CD27<sup>hi</sup>CD38<sup>hi</sup> ASCs present and the IgD<sup>+</sup>CD27<sup>neg</sup> B cells that are present in the Be1 cultures ([Fig.](#)  
237 [4k-l](#)). Furthermore, when we performed the same experiment using CTV-labeled B<sub>N</sub> cells, it was clear  
238 that the IRF4 expression levels were tied to the proliferative history of the T-bet<sup>hi</sup> B<sub>DN</sub> cells ([Fig. 4m](#)) and  
239 that the Tbet<sup>hi</sup>IRF4<sup>int</sup> B<sub>DN</sub> subset was a potential precursor of the T-bet<sup>lo</sup>IRF4<sup>hi</sup> ASCs.

240  
241 To confirm that the Be1 T-bet<sup>hi</sup> B<sub>DN</sub> cells are functional pre-ASCs, we sort-purified the IgD<sup>neg</sup>CD27<sup>neg</sup> B<sub>DN</sub>  
242 cells from both Be1 and Be2 co-cultures, labeled the sorted subsets with CTV, incubated the cells for 18  
243 hrs in conditioned media and finally enumerated CD27<sup>hi</sup>CD38<sup>hi</sup> ASCs in the cultures. As expected, the  
244 sorted Be1 and Be2 B<sub>DN</sub> cells were activated with 47-65% of the cells undergoing one cell division within  
245 18 hrs ([Fig. 4n](#)). CD27<sup>hi</sup>CD38<sup>hi</sup> ASCs were only detected in proliferating cells ([Fig. 4n](#)), indicating that the  
246 sorted B<sub>DN</sub> cells include pre-ASCs that are poised to differentiate within one round of replication.  
247 Importantly, while both Be1 and Be2 B<sub>DN</sub> cells gave rise to ASCs, ASC development was significantly  
248 enhanced in cultures containing the sorted T-bet expressing Be1 B<sub>DN</sub> cells ([Fig. 4o](#)). Thus, activation of  
249 B<sub>N</sub> cells with Th1 cells and IL-21 + IL-2 gives rise to a population of T-bet<sup>hi</sup> B<sub>DN</sub> cells that are similar at a  
250 phenotypic, molecular and functional level to the T-bet<sup>hi</sup> DN2 pre-ASCs that are expanded in SLE patients  
251 (19).

252  
253 **Identification of predicted regulators of the T-bet<sup>hi</sup> B<sub>DN</sub> pre-ASC population.** Given the similarities



254 between the *in vitro* generated Th1-induced T-bet<sup>hi</sup> B<sub>DN</sub> subset and the T-bet<sup>hi</sup> DN2 pre-ASC population  
255 that is expanded in some SLE patients (19), we hypothesized that we could use the transcriptome data  
256 from our *in vitro* generated pre-ASCs to could be used to predict upstream molecular signals that might  
257 give rise to this these cells in SLE patients. We therefore analyzed the RNA-seq data from the Be1 and  
258 Be2 B<sub>DN</sub> cells using Ingenuity Pathway Analysis (IPA) to identify predicted upstream regulators that direct  
259 B<sub>N</sub> cells to develop into T-bet<sup>hi</sup> B<sub>DN</sub> pre-ASCs. Not unexpectedly, predicted upstream regulators of the *in*  
260 *vitro* generated Be1 B<sub>DN</sub> cells included type 1 and type 2 IFNs and the IFN-induced transcription factor  
261 STAT1 (Fig. 5a). Interestingly, and despite the fact that exogenous IL-2 + IL-21 and matched allogeneic  
262 T cells were included in both Be1 and Be2 cultures, Ag receptor signals, IL-2 and the IL-21 activated  
263 transcription factor STAT-3 were predicted to be upstream activators of the Be1 B<sub>DN</sub> cells but not the Be2  
264 B<sub>DN</sub> cells (Fig. 5a). In addition, both TLR7 and TLR9 were predicted as upstream regulators of the T-bet<sup>hi</sup>  
265 B<sub>DN</sub> Be1 cells (Fig. 5a). This was surprising, given that we did not add exogenous TLR ligands to the co-  
266 cultures, however, endogenous TLR ligands are known to be released by dying cells *in vitro* (52).  
267 Collectively, these data suggested that the T-bet<sup>hi</sup> B<sub>DN</sub> cells might be hyperresponsive to IL-2, IL-21 and/or  
268 TLR ligands, similar to what was reported for T-bet<sup>hi</sup> DN2 cells from SLE patients (19).

269  
270 **Transient BCR stimulation promotes ASC development from T-bet<sup>hi</sup> B<sub>DN</sub> pre-ASCs.** Using the  
271 predictions from the IPA analysis of the Be1 T-bet<sup>hi</sup> B<sub>DN</sub> cells we next asked whether we could induce the  
272 formation of the T-bet<sup>hi</sup> B<sub>DN</sub> pre-ASC population using fully defined stimuli. We therefore activated HD B<sub>N</sub>  
273 cells for 6 days with anti-Ig, cytokines (IFN $\gamma$ , IL-2, IL-21 and Baff) and the TLR7/8 ligand, R848 (Fig. 5b).  
274 Greater than 95% of the B cells activated with these defined stimuli were IgD<sup>neg</sup>CD27<sup>neg</sup> T-bet<sup>hi</sup>IRF4<sup>int</sup>  
275 (Fig. 5c). In addition, these cells expressed CD11c and FcRL5 but not CD21 and had begun  
276 downregulating CXCR5 (Fig. 5d) and were thus phenotypically similar to the SLE patient T-bet<sup>hi</sup> DN2  
277 cells (19). Importantly, we obtained similar results when we stimulated sort-purified T-bet<sup>lo</sup> B<sub>N</sub> cells from  
278 SLE patients with the same activation cocktail (Fig. 5e), suggesting that these defined stimuli are  
279 sufficient to activate T-bet<sup>lo</sup> B<sub>N</sub> cells, isolated from either HD or SLE patients, to develop into a population  
280 of T-bet<sup>hi</sup> B<sub>DN</sub> cells that are phenotypically similar to the SLE patient-derived T-bet<sup>hi</sup> DN2 population.

281  
282 Despite the fact that >95% of the HD or SLE B<sub>N</sub> cells activated with these defined stimuli developed into  
283 what phenotypically appeared to be T-bet<sup>hi</sup> B<sub>DN</sub> pre-ASCs (Fig. 5d-e), no CD38<sup>hi</sup>CD27<sup>hi</sup> ASCs were  
284 detected in either culture (Fig. 5f-g). This suggested to us that our cultures were either missing a stimulus  
285 that is required for the differentiation of the pre-ASCs into ASCs or that one of the factors in our defined  
286 stimulation cocktail prevents differentiation of T-bet<sup>hi</sup> B<sub>DN</sub> cells into ASCs. Since our original Th1/B<sub>N</sub> co-  
287 cultures did not contain anti-Ig, we examined whether removing anti-Ig or only providing it transiently  
288 would impact pre-ASC and ASC formation. We therefore stimulated CTV-labeled B<sub>N</sub> cells for six days  
289 with the complete activation cocktail (+,+) or removed the anti-Ig from the activation cocktail for the first

290 three days (-,+), last three days (+,-), or throughout the entire culture period (-,-) (Fig. 5h). T-bet<sup>hi</sup>IRF4<sup>int</sup>  
291 cells were easily detected by day 3 in the cultures that lacked anti-Ig for the first 3 days (Fig. 5i), indicating  
292 that early BCR signals are not obligate for the development of the pre-ASC population. However, the  
293 proliferative response of the B cells (Fig. 5j-k), cell recovery (Fig. 5l) and ASC development (Fig. 5m-n)  
294 was highly dependent on early but transient exposure to anti-Ig. Specifically, ASCs were detected when  
295 anti-Ig was present during the first three days of culture but were greatly reduced when anti-Ig was added  
296 late to the cultures or included for all 6 days (Fig. 5m-n). Moreover, early (day 0-3) but transient  
297 stimulation with anti-Ig resulted in more proliferation (Fig. 5j-k), better cell recovery (Fig. 5l) and maximal  
298 recovery of ASCs on day 6 (Fig. 5o) compared to all other conditions. To confirm that B<sub>N</sub> cells from SLE  
299 patients behaved similarly, we activated sort purified SLE T-bet<sup>lo</sup> B<sub>N</sub> cells with the same stimulation  
300 cocktail without any anti-Ig or included anti-Ig for the first 3 days of the culture or throughout the whole  
301 culture period. Again, ASC recovery was optimal when anti-Ig was included transiently during the first  
302 three days of the culture (Fig. 5p-q). Taken together, the data indicated that early and transient BCR  
303 ligation enhanced cell recovery, proliferation and ASC formation when B<sub>N</sub> cells from either HD or SLE  
304 patients were activated with R848, IFN $\gamma$ , IL-21, IL-2 and Baff, while sustained BCR stimulation  
305 suppressed ASC development (Fig. 5q).

306

307 **ASC development from T-bet<sup>hi</sup>IRF4<sup>int</sup> pre-ASCs is regulated by IFN $\gamma$ , TLR7 and IL-21.** Now that we  
308 had identified a set of defined stimulation conditions that induced the formation of T-bet<sup>hi</sup> B<sub>DN</sub> cells and  
309 ASCs, we next asked which signals were critical for the formation of the T-bet<sup>hi</sup> B<sub>DN</sub> subset and the  
310 development and maximal recovery of ASCs in the cultures. We therefore set up “all minus one cultures”  
311 by activating CTV-labeled B<sub>N</sub> cells for six days – three days in the presence of anti-Ig and three days  
312 without anti-Ig – while excluding one stimulus for all six days of the culture (Fig. 6a). As expected, when  
313 HD B<sub>N</sub> cells were activated for three days in the presence of anti-Ig and all cytokines + R848, >90% of  
314 the cells upregulated T-bet and IRF4 (Fig. 6b). Similar results were observed when the anti-Ig stimulated  
315 B<sub>N</sub> cells were activated for three days without R848, IL-21, BAFF or IL-2 (Fig. 6b). Thus, despite earlier  
316 studies using mouse B cells that showed that T-bet expression can be induced by TLR and IL-21 signals  
317 (53), these data show that, at least under this set of stimulation conditions, TLR and IL-21 are not obligate  
318 for upregulation of T-bet or IRF4. By contrast, when the cells were activated without IFN $\gamma$ , more than 80%  
319 of the cells were T-bet<sup>neg/lo</sup>. While this wasn't particularly surprising, given that T-bet is an IFN $\gamma$ -induced  
320 transcription factor (14), the cells also failed to upregulate IRF4 (Fig. 6b). Thus, IFN $\gamma$  signals are required  
321 for the establishment of the T-bet<sup>hi</sup>IRF4<sup>int</sup> pre-ASC population.

322

323 In agreement with our earlier experiments, we observed maximal cell proliferation (Fig. 6c-d), cell  
324 recovery (Fig. 6e) and ASC development (Fig. 6f-g) when B cells were activated with anti-Ig, R848 and  
325 cytokines for three days and then incubated an additional three days with the same stimuli minus anti-Ig.

326 Despite the known role for BAFF in mature B cell survival (54), eliminating BAFF from the cultures had  
327 only a modest impact on any of the measured parameters (Fig. 6c-g). Consistent with prior reports  
328 showing that ASC development from B<sub>N</sub> cells is dependent on IL-21 (45, 46), few ASCs, whether  
329 measured by frequency (Fig. 6f-g) or number (Fig. 6h), were present in the cultures lacking IL-21.  
330 Although similar frequencies of ASCs were found in cultures that lacked R848, IFN $\gamma$  or IL-2 (Fig. 6f-g),  
331 proliferation (Fig. 6c-d) and cell recovery (Fig. 6e), including recovery of ASCs on day 6 (Fig. 6h), were  
332 significantly impaired. In fact, total ASC recovery in cultures lacking R848 or IFN $\gamma$  was as low as that  
333 observed in the cultures lacking IL-21 (Fig. 6h). These data therefore indicated that BAFF is dispensable  
334 for the formation and recovery of pre-ASCs and ASCs. IL-2, while not absolutely essential, contributes  
335 significantly to ASC recovery. Finally, IFN $\gamma$ , R848 and IL-21 play critical but distinct roles in the formation  
336 of T-bet<sup>hi</sup>IRF4<sup>int</sup> pre-ASC population and in the development and recovery of ASCs (Fig. 6i).

337

338 **Temporal control of ASC development from T-bet<sup>hi</sup>IRF4<sup>int</sup> pre-ASCs by IFN $\gamma$ , TLR7 ligand and IL-**  
339 **21.** Our data indicated IFN $\gamma$  was required for the development of the T-bet<sup>hi</sup>IRF4<sup>int</sup> pre-ASCs and  
340 suggested that ASC formation from this pre-ASC population was promoted by IL-21 and repressed by  
341 sustained BCR signaling. Moreover, the data showed that IFN $\gamma$  and TLR7/8 signals were critically  
342 important for ASC recovery. Given these results, we postulated that IFN $\gamma$  signals would be more important  
343 early after activation (Days 0-3, priming phase) while TLR7/8 and IL-21 signals would be more critical  
344 later in the culture period (Days 4-6, expansion/differentiation phase). To test this hypothesis, we  
345 measured proliferation, cell recovery and the frequency and number of ASCs present in cultures  
346 containing CTV-labeled B<sub>N</sub> cells that were activated for three days in the presence of anti-Ig and three  
347 days without anti-Ig – while adding IFN $\gamma$  (Fig. 7a-h), R848 (Fig. 7i-p) or IL-21 (Fig. 7q-x) during the priming  
348 phase (+,-), during the expansion/differentiation phase (-,+), or throughout (+,+) the culture period.

349

350 As expected, eliminating IFN $\gamma$  from the cultures during the first 3 days (Fig. 7a) prevented formation of  
351 the T-bet<sup>hi</sup>IRF4<sup>int</sup> pre-ASC population (Fig. 7b). In addition, B<sub>N</sub> cells that did not receive an IFN $\gamma$  signal  
352 during the priming phase proliferated less over the 6 day culture period (Fig. 7c-d), resulting in minimal  
353 cell recovery on day 6 (Fig. 7e). By contrast, adding IFN $\gamma$  in the priming phase was sufficient to induce  
354 formation of the T-bet<sup>hi</sup>IRF4<sup>int</sup> pre-ASC population (Fig. 7b) and to promote proliferation and cell recovery  
355 measured on day 6 (Fig. 7c-e). Moreover, addition of IFN $\gamma$  only during the early priming phase resulted  
356 in similar frequencies (Fig. 7f-g) and numbers (Fig. 7h) of ASCs compared to cultures that contained IFN $\gamma$   
357 throughout the entire culture period.

358

359 Excluding R848 from the cultures during the first three days (Fig. 7i) had a minimal impact on pre-ASC  
360 formation (Fig. 7j) or the proliferative history (Fig. 7k-l) and differentiation potential (Fig. 7n-o) of the cells.

361 However, cell recovery on day 6 was significantly decreased when R848 was excluded during the priming  
362 phase (Fig. 7m), which impacted the number of ASCs recovered (Fig. 7p), suggesting that early R848  
363 signals likely enhances cell survival during the differentiation phase. When R848 was selectively  
364 excluded in the differentiation phase, proliferation was severely stunted (Fig. 7k-l), resulting in greatly  
365 reduced cell recovery (Fig. 7m) and ASC recovery (Fig. 7p) on day 6. These data therefore indicated that  
366 R848 plays both early and late roles in the development of ASCs with early TLR7/8 signals appearing to  
367 condition the B cells to survive during the later TLR7/8-dependent proliferative phase.

368  
369 When IL-21 was only included for the first three days of the culture (Fig. 7q), pre-ASCs formed normally  
370 (Fig. 7r) but proliferation (Fig. 7s-t) and cell recovery (Fig. 7u) on day 6 was extremely low. This resulted  
371 in an inability to detect (Fig. 7v-w) and recover ASCs on day 6 (Fig. 7x). By contrast, the proliferation  
372 (Fig. 7s-t) and recovery (Fig. 7u) of cells stimulated with IL-21 only during the late  
373 expansion/differentiation phase were not significantly different from cells that were stimulated for all six  
374 days in the presence of IL-21. Moreover, the frequency (Fig. 7v-w) and number (Fig. 7x) of ASCs  
375 recovered on day 6 were very similar, indicating that late IL-21 signals are sufficient to drive ASC  
376 formation. Collectively, the data show that while inclusion of IFN $\gamma$ , TLR7/8 ligand and IL-21 throughout  
377 the entire culture period promotes optimal ASC recovery, the window in which each stimulus was required  
378 was distinct with IFN $\gamma$  playing an important role in the priming phase, IL-21 signals contributing during  
379 the later expansion and differentiation phase of the response and R848 being important throughout the  
380 culture period (Fig. 7y). Importantly, the data also indicated that the combination of R848 and IL-21, even  
381 when included for all 6 days of the culture was not sufficient to induce ASC formation and recovery. Thus,  
382 IFN $\gamma$  signals appear to synergize with R848 and IL-21 signals to promote ASC formation.

383  
384 **IFN $\gamma$  synergizes with IL-2 to promote ASC recovery.** Our data indicated that IFN $\gamma$  signals play a non-  
385 redundant and critical role in the formation of the Tbet<sup>hi</sup>IRF4<sup>int</sup> B<sub>DN</sub> pre-ASC population *in vitro*, and is  
386 necessary for both the development and recovery of ASCs in the cultures, even when IL-21 and R848  
387 are present in the cultures. These data led us to hypothesize that IFN $\gamma$  signaling might program B cells  
388 to optimally respond to stimuli, like IL-21, IL-2 and TLR ligands, that promote B cell proliferation and  
389 differentiation. To test this hypothesis, we first addressed whether IFN $\gamma$  cooperates with IL-2 to promote  
390 ASC development. We activated HD B<sub>N</sub> cells with anti-Ig + R848 and then washed and incubated the  
391 cells for an additional 3 days with IL-21 + R848 (Be.0 conditions; Fig. 8a). Alternatively, we added IL-2  
392 (Be.IL2), IFN $\gamma$  (Be.IFN $\gamma$  conditions) or both IL-2 and IFN $\gamma$  (Be. $\gamma$ 2 conditions) to the cultures during the first  
393 three days (Fig. 8a) and then stimulated the cells for an additional 3 days with R848 + IL-21. As expected,  
394 from our earlier experiments, we recovered very few cells and no ASCs from the Be.0 cells on day 6  
395 (data not shown). When we examined the B cells from the Be.IFN $\gamma$ , Be.IL2 and Be. $\gamma$ 2 cultures we

396 observed that the B cells that were exposed to IFN $\gamma$  during the first 3 days proliferated more, regardless  
397 of whether we looked on day 3 (Fig. 8b-c) or day 6 (Fig. 8d-e). This effect was relatively modest at day 3  
398 as 20% of the Be.IL2 cells vs 42-53% of the Be.IFN $\gamma$  and Be. $\gamma$ 2 cells had divided once over 3 days (Fig.  
399 8b-c). Consistent with this, cell recovery on day 3 was only reduced by 20% in the Be.IL2 cultures (Fig.  
400 8f). However, by day 6 we observed a 4-fold reduction in cell recovery between the Be.IL2 and Be.IFN $\gamma$   
401 cultures (Fig. 8g) and a 7-fold reduction in cell recovery between Be.IL2 and Be. $\gamma$ 2 cultures (Fig. 8g).  
402 Moreover, while the fraction of ASCs present in all 3 cultures were not significantly different (Fig. 8h-i),  
403 the number of ASCs recovered in the Be.IL2 cultures was significantly lower (Fig. 8j) when compared to  
404 either the Be.IFN $\gamma$  or Be. $\gamma$ 2 cultures. Interestingly, the recovery of ASCs on day 6 was significantly better  
405 in the Be. $\gamma$ 2 cultures compared to the Be.IFN $\gamma$  or Be.IL2 cultures (Fig. 8j). Thus, while early IL-2 and IFN $\gamma$   
406 signals promote cell cycle entry by BCR and TLR7/8 activated B cells, only early IFN $\gamma$  signals effectively  
407 sustained the proliferative and differentiation potential of the B cells. Finally, since the combined total of  
408 ASCs recovered from the Be.IFN $\gamma$  and Be.IL2 cultures was less than that recovered from the Be. $\gamma$ 2  
409 cultures, the data suggested that IFN $\gamma$  likely cooperates with IL-2 to promote ASC recovery.

410

411 **IFN $\gamma$  synergizes with subthreshold TLR7/8 signals to promote ASC recovery.** Our earlier upstream  
412 regulator analysis of T-bet<sup>hi</sup> B<sub>DN</sub> cells from Th1 co-cultures indicated that the TLR signaling pathway was  
413 activated in these cells (Fig. 5a), even though we did not add TLR ligands to the cultures. This suggested  
414 that the T-bet<sup>hi</sup> B<sub>DN</sub> cells, which were activated in the presence of IFN $\gamma$ -producing Th1 cells, might be  
415 more responsive to the low levels of endogenous TLR ligands that are released by dying cells in culture  
416 (52). To test this possibility, we activated CTV-labeled HD B<sub>N</sub> cells with anti-Ig, IL-2 and increasing doses  
417 of R848 (0-10  $\mu$ g/ml) in the presence and absence of IFN $\gamma$  (10 ng/ml) for 3 days. We then washed the  
418 cells and re-cultured the cells for an additional 3 days with IL-21 and the same concentration of R848  
419 that the cells were exposed to during the priming phase. On day 6 we measured cell division and ASC  
420 formation. Consistent with our earlier experiments (Fig. 7), when R848 was not included in the cultures  
421 during the first 3 days the cells remained largely undivided even out to day 6 (Fig. 9a) and few ASCs  
422 were detected (Fig. 9b), regardless of whether the cells were exposed to IFN $\gamma$  during first three days. By  
423 contrast, when high dose R848 was included in the first three days, the cells proliferated efficiently with  
424 or without IFN $\gamma$  (Fig. 9a), although the presence of IFN $\gamma$  did increase the fraction of cells that had  
425 undergone 6+ cell divisions (Fig. 9a). Interestingly, when we activated B<sub>N</sub> cells with a 10-fold lower dose  
426 of TLR7/8 ligand (0.1  $\mu$ g/ml), we observed minimal proliferation in the cultures that did not include IFN $\gamma$   
427 ( $\leq$ 3% divided  $\geq$ 3 times) versus robust proliferation (63% divided  $\geq$ 3 times) in the cultures that contained  
428 IFN $\gamma$  (Fig. 9a). More striking, we observed that the frequency of ASCs in the cultures that were activated  
429 with low dose TLR ligand in the presence of IFN $\gamma$  was approximately 10-fold higher than that observed  
430 for the cultures that lacked IFN $\gamma$  (Fig. 9b). These data clearly demonstrate that exposure of B<sub>N</sub> cells IFN $\gamma$

431 during the initial priming phase allowed these cells to respond to a sub-optimal dose of R848 and to  
432 differentiate into ASCs.

433

434 To test whether the combination of TLR ligands and IFN $\gamma$  synergistically promoted ASC formation, we  
435 cultured HD B<sub>N</sub> cells with anti-Ig + IL-2 while cross-titrating in IFN $\gamma$  and R848. On day 3, we washed and  
436 recultured the cells for an additional 3 days with IL-21 plus the same concentration of R848 that was used  
437 in the priming phase. We then measured ASC formation in the cultures on day 6. As expected, when  
438 R848 was not included in the cultures, the frequency of ASC in the cultures was very low, regardless of  
439 the dose of IFN $\gamma$  included during the priming phase (Fig. 9c). However, when IFN $\gamma$  was present at 10  
440 ng/ml in the priming phase, the B cells responded to concentrations of R848 that were 100-1000 times  
441 lower (0.01  $\mu$ g/ml) than what is normally used to stimulate B cells (Fig. 9c). Moreover, when we examined  
442 the response of the B cells that were activated in the presence of a sub-optimal concentration of R848  
443 (0.1  $\mu$ g/ml), we observed a clear dose response to the IFN $\gamma$ , with increasing concentrations of IFN $\gamma$  giving  
444 rise to a higher frequency of ASCs in the cultures (Fig. 9c). These data therefore show that IFN $\gamma$  signaling  
445 confers human B cells with the capacity to respond to extremely low subthreshold concentrations of  
446 TLR7/8 ligands, which when combined with IL-21 signals results in their robust proliferation and  
447 differentiation into ASCs.

448

449 **IFN $\gamma$  programs IL-21R expression and responsiveness.** Our data showed that early IFN $\gamma$  signals  
450 synergize with TLR7/8 and IL-2 signals to poise the BCR-activated B cells to respond to proliferation and  
451 differentiation cues provided by subsequent exposure to IL-21 and R848. Given the important role for IL-  
452 21 in the commitment of human B cells to the ASC lineage (45, 46), we hypothesized that early IFN $\gamma$   
453 signals might regulate IL-21R expression and/or IL-21R signaling in the stimulated B cells. To test this  
454 hypothesis, we first measured IL-21R expression levels by day 3 and day 6 Be.0, Be.IL2, Be.IFN $\gamma$  and  
455 Be. $\gamma$ 2 cells (Fig. 9d). Although day 3 B cells from Be.IFN $\gamma$  and Be. $\gamma$ 2 cultures expressed slightly higher  
456 levels of IL-21R compared to B cells from Be.0 and Be.IL2 cultures (Fig. 9e), IL-21R expression was low  
457 in all groups at this timepoint. However, by day 6, IL-21R expression levels were significantly increased  
458 in the Be.IFN $\gamma$  and Be. $\gamma$ 2 cells relative to the Be.0 and Be.IL2 cells (Fig. 9f). Upregulation of the IL-21R  
459 by B cells from the Be.IFN $\gamma$  and Be. $\gamma$ 2 cultures was not linked to cell division as even the undivided cells  
460 in these day 6 cultures expressed high levels of IL-21R (Fig. 9g). Moreover, IL-21R expression levels  
461 were directly comparable between day 6 Be.IFN $\gamma$  and Be. $\gamma$ 2 cells (Fig. 9f), demonstrating that early IFN $\gamma$   
462 signals were necessary and sufficient to program upregulation of IL-21R.

463

464 To address whether early IFN $\gamma$  stimulation also increased responsiveness to IL-21, we generated day 3  
465 Be.0, Be.IFN $\gamma$ , Be.IL2 and Be. $\gamma$ 2 cells (Fig. 9h) and measured phospho-STAT3 levels in these cells under

466 basal conditions and following 20 min stimulation with IL-21. Day 3 basal levels of pSTAT3 were similar  
467 between the Be.0, Be.IL2 and Be.IFN $\gamma$  cells and modestly higher in the Be. $\gamma$ 2 cells (Fig. 9i). However,  
468 following a 20 min IL-21 stimulation pSTAT3 levels were increased by 2-fold in the B cells that were  
469 exposed to IFN $\gamma$  during the priming phase (Fig. 9j-k). More importantly, when Be.IL2 and Be. $\gamma$ 2 cells were  
470 washed on day 3 to remove IFN $\gamma$  and IL-2 and then recultured for 24 hrs in the presence of IL-21 and  
471 R848 (Fig. 9l), basal pSTAT3 levels were increased in the Be. $\gamma$ 2 cells relative to the Be.IL2 cells (Fig.  
472 9m). Similarly, pSTAT3 levels in the day 4 Be. $\gamma$ 2 cells were higher compared to Be.IL2 cells following a  
473 20 min restimulation with IL-21 (Fig. 9n-o). Thus, early IFN $\gamma$  stimulation, particularly when combined with  
474 IL-2, promoted increased IL21R expression and enhanced IL-21R signaling.

475

476 **Early IFN $\gamma$  signals alter the epigenetic landscape of activated B<sub>N</sub> cells and poise T-bet<sup>hi</sup> B<sub>DN</sub> cells**  
477 **to differentiate.** To address how IFN $\gamma$  signaling cooperates with IL-2 and TLR7/8 ligands to poise B cells  
478 to differentiate in response to IL-21, we considered the possibility that IFN $\gamma$  signaling might alter the  
479 epigenetic profile of the T-bet<sup>hi</sup> B<sub>DN</sub> B cells since T-bet is known to alter chromatin accessibility by  
480 recruiting chromatin-modifying enzymes to regulatory promoter and enhancer regions (14). To address  
481 this hypothesis, we performed ATAC-seq analysis on day 3 Be.0, Be.IL2, Be.IFN $\gamma$  and Be. $\gamma$ 2 cells and  
482 identified differentially accessible regions (DARs) that were assigned to different gene loci across the  
483 genome (Supplemental File 3). As expected, distinct sets of DARs were found in all 4 groups (Fig. 10a),  
484 however the Be. $\gamma$ 2 cells had the greatest number of DARs (Fig. 10a). Moreover, it appeared that the  
485 chromatin accessibility pattern in the Be. $\gamma$ 2 cells reflected cooperation or synergy between the IFN $\gamma$  and  
486 IL-2 signals (Fig. 10a). To determine whether specific transcription factor (TF) binding motifs were  
487 differentially enriched in the DAR of the Be.IL2, Be.IFN $\gamma$  and Be. $\gamma$ 2 genomes, enriched TF-binding motifs  
488 were identified in each cell population relative to the Be.0 cells (Supplementary File 4). Chromatin  
489 accessibility surrounding TFs binding motifs, like AP1, RUNX, PU.1 and NFAT, was greatly enriched in  
490 all 3 groups relative to the Be.0 cells (Fig. 10b). Accessibility around other TF binding motifs like, IRF1  
491 and T-bet, was enriched specifically in the B cells that were exposed to IFN $\gamma$ , while accessibility at STAT5  
492 binding motifs was enriched in IL-2 exposed B cells (Fig. 10b, Supplementary File 4). Interestingly,  
493 despite the fact that all 4 groups, including Be.0 cells, were exposed to high dose TLR7/8 ligand and anti-  
494 Ig, we observed enrichment in NF- $\kappa$ B p65 and NF- $\kappa$ B REL binding motifs within the Be.IL2, Be. $\gamma$  and  
495 Be. $\gamma$ 2 DAR relative to Be.0 cells (Fig. 10b). However, when we examined accessibility within the 100 bp  
496 surrounding the NF- $\kappa$ B binding motifs, it was clear that NF- $\kappa$ B binding sites were most accessible in the  
497 Be. $\gamma$ 2 cells compared to all other groups (Fig. 10c-d, Supplementary Files 4-5). This was also true when  
498 we examined accessibility surrounding STAT5 binding motifs and T-bet binding motifs (Fig. 10e-f,  
499 Supplementary Files 5). Thus, the combination of early IFN $\gamma$  and IL-2 signals in BCR and TLR7/8-

500 activated B<sub>N</sub> cells significantly and synergistically increased chromatin accessibility surrounding T-bet,  
501 STAT5 and NF-κB binding sites within the activated B cells.

502

503 Interestingly, chromatin accessibility surrounding the HOMER-defined IRF4 and BLIMP1 binding motif  
504 (55) was also enriched in the Be.γ2 cells (Fig. 10g-h, Supplementary Files 5). These data therefore  
505 suggested that these key ASC initiating TFs were already exerting epigenetic changes to the genome of  
506 the Be.γ2 cells, even before these cells were exposed to IL-21. Consistent with this finding, when we  
507 examined the *PRDM1* locus, we identified 4 DARs that were each more accessible in the Be.γ2 cells  
508 relative to the other cells (Fig. 10i). Interestingly, while none of these DAR contained a T-bet binding  
509 motif, each of these 4 DAR directly aligned with peaks previously identified in a published T-bet ChIP-  
510 seq analysis of GM12878 cells (56), suggesting that T-bet could be associated with TF complexes that  
511 bind to these regulatory regions. Moreover, 3 of the 4 PRDM1-associated DARs were also seen in T-  
512 bet<sup>hi</sup> DN2 cells purified from SLE patients (Fig. 10i), indicating that these DARs are present in the pre-  
513 ASC population found in SLE patients.

514

515 Finally, given our data showing that IFN<sub>γ</sub> and IL-2 enhanced expression of IL-21R and potentiated  
516 signaling through this receptor, we examined the 2 DAR assigned to the *IL21R* locus of the day 3 cells  
517 (Fig. 10j). One of the DAR contained two putative T-bet binding motifs and was directly aligned with a T-  
518 bet ChIP-seq peak from GM12878 cells (56) (Fig. 10j). This DAR was only observed in the cells that  
519 were exposed to IFN<sub>γ</sub> and was most enriched in the Be.γ2 population. Interestingly, we identified the  
520 same DAR in the SLE patient T-bet<sup>hi</sup> DN2 cells (Fig. 10j), which are reported to be highly responsive to  
521 IL-21 (19). Taken together, the data suggested that early IFN<sub>γ</sub> signals synergize with BCR, TLR and IL-  
522 2 signals to induce global changes in chromatin accessibility and promote increased TF binding at T-bet,  
523 NF-κB, STAT5, BLIMP1 and IRF4 binding sites as well as chromatin remodeling at the *PRDM1* and  
524 *IL21R* loci.

525

526 **SLE T-bet<sup>hi</sup> DN2 cells differentiate rapidly into ASCs.** Previous data from our group showed that the  
527 T-bet<sup>hi</sup> DN2 cells from SLE patients are pre-ASCs (19) but that these cells are not memory cells and, like  
528 B<sub>N</sub> cells (46), are highly dependent on IL-21 signals to differentiate. Given our data showing that the  
529 DARs found in the *PRDM1* and *IL21R* loci of the day 3 T-bet<sup>hi</sup>IRF4<sup>int</sup>-expressing Be.γ2 cells were also  
530 conserved in the T-bet<sup>hi</sup> DN2 cells from SLE patients, we hypothesized that stimulation of the SLE DN2  
531 cells with IL-21, IL-2 and TLR7/8 ligand would result in rapid differentiation into ASCs. To test this  
532 hypothesis, we enumerated IgG-producing ASCs after sort-purifying SLE patient-derived T-bet<sup>lo</sup> B<sub>N</sub> cells,  
533 T-bet<sup>lo</sup> memory B cells (T-bet<sup>lo</sup> B<sub>DN</sub> (DN1 memory cells) and T-bet<sup>lo</sup> B<sub>SW</sub>) and T-bet<sup>hi</sup> DN2 cells, (Fig. 10k-  
534 m) and then stimulating the cells with R848, IFN<sub>γ</sub>, IL-21 and IL-2 for 2.5 days. As expected, the two



535 memory B cell subsets efficiently formed ASCs in this short timeframe (Fig. 10n), while B<sub>N</sub> cells failed to  
536 differentiate (Fig. 10n). However, ASCs were easily identified in the day 2.5 T-bet<sup>hi</sup> DN2 cultures (Fig.  
537 10n) and ASC recovery was at least 50-fold higher in T-bet<sup>hi</sup> DN2 cell cultures compared to the B<sub>N</sub> cultures  
538 and only 2-3 times less than that seen with the memory B cell populations (Fig. 10n). Thus, these data  
539 are consistent with the interpretation that the expanded population of T-bet<sup>hi</sup> DN2 cells present in some  
540 SLE patients likely represent a discrete population of B<sub>N</sub>-derived pre-ASCs that received prior  
541 programming signals from TLR, IFN $\gamma$  and antigen signals and are poised to differentiate into ASCs upon  
542 downregulation of the BCR signaling cascade and exposure to IL-21. The relevance of these findings to  
543 pathogenic and protective B cells responses are discussed.

544

## 545 Discussion

546 Here we show that activation of human naïve B ( $B_N$ ) cells with allogeneic  $IFN\gamma$ -producing Th1 cells  
547 induces formation of a T-bet<sup>hi</sup>IRF4<sup>int</sup> IgD<sup>neg</sup>CD27<sup>neg</sup> ( $B_{DN}$ ) population that is transcriptionally and  
548 phenotypically very similar to the T-bet expressing CD11c<sup>hi</sup>CXCR5<sup>lo</sup>  $B_{DN}$  (referred to as DN2 cells) subset  
549 found in SLE patients (19) and the CD11c<sup>hi</sup> Age-Associated B cells (ABCs) that accumulate in aged and  
550 autoimmune mice and humans (18, 27). The *in vitro* generated T-bet<sup>hi</sup>IRF4<sup>int</sup>  $B_{DN}$  cells are transcriptionally  
551 poised to become ASCs as they express a number of ASC-specific genes, including genes that are direct  
552 targets of the ASC commitment transcription factor IRF4. Moreover, a significant fraction (up to 40%) of  
553 sorted T-bet<sup>hi</sup>IRF4<sup>int</sup>  $B_{DN}$  cells differentiate into ASCs following a single cell division. The presence of the  
554 T-bet<sup>hi</sup>IRF4<sup>int</sup>  $B_{DN}$  pre-ASCs, which were found in the Th1/ $B_N$  co-cultures but not in Th2/ $B_N$  co-cultures,  
555 positively correlates with ASC formation in the cultures, suggesting that one or more signals provided by  
556 Th1 cells enhance ASC development and recovery. Our data show that one of the key Th1-derived  
557 signals that promotes ASC development is  $IFN\gamma$ .

558  
559 Prior mouse studies provide hints that  $IFN\gamma$  signals can enhance ASC responses. For example, excess  
560  $IFN\gamma$  produced by Tfh1-like CD4 T cells from autoimmune mice is associated with increased germinal  
561 center (GC) responses and autoAb production (57) and B cell intrinsic expression of  $IFN\gamma$ R and the  $IFN\gamma$ -  
562 activated transcription factor, STAT1 (20, 21), is necessary for the development of autoAbs in some SLE  
563 models. Consistent with these results, multiple reports indicate that  $IFN\gamma$ R signaling may be dysregulated  
564 in patients with autoAb-mediated disease, particularly those with SLE (9). For example, prior studies  
565 show that the transcriptome of PBMCs from some SLE patients is enriched in  $IFN\gamma$ -induced genes (10,  
566 11) and other publications reveal that mRNA and protein levels of T-bet, a known  $IFN\gamma$ -induced  
567 transcription factor (14), are elevated in T (8) and B cells (17-19) from SLE patients. Moreover, patients  
568 with active disease are more likely to exhibit a skewed “Th1-like” profile (8, 16) as measured by  
569 determining the ratios of T-bet to GATA-3 transcripts or  $IFN\gamma$  to IL-4 transcripts. Finally, elevated serum  
570  $IFN\gamma$  can be observed years before the onset of clinical disease in many patients (12, 13).

571  
572 Despite all of the indirect data suggesting a role for  $IFN\gamma$  signaling in human B cell autoAb responses,  
573 surprisingly little has been done to address how, at a mechanistic level,  $IFN\gamma$  signaling might shape B cell  
574 Ab responses in either mice or humans. This is particularly true for human B cells as earlier *in vitro*  
575 experiments with  $IFN\gamma$ -stimulated human B cells revealed only very modest effects on activation and  
576 differentiation (58-60) and reports examining vaccine responses in STAT1 deficient patients (61, 62)  
577 indicated that these individuals were competent to produce Abs in response to at least some vaccines.  
578 These data, which argue that  $IFN\gamma$  and STAT1 signaling are not obligate for human B cell Ab responses,  
579 agree with our *in vitro* studies showing that B cells can differentiate in the absence of  $IFN\gamma$ -induced

580 signals. In fact, the frequency of ASCs that we detect in our co-cultures containing Th2 cells and B<sub>N</sub> cells  
581 plus IL-21 and IL-21 is similar (~5%) to that reported previously for human B<sub>N</sub> cells activated with CD40L,  
582 IL-2 and IL-21 (63). Our novel finding is that B cell intrinsic IFN $\gamma$  signals can greatly augment B<sub>N</sub> ASC  
583 responses by enhancing proliferation and differentiation induced by TLR7/8 ligands and IL-21. Indeed,  
584 we routinely recovered 4-10 fold more ASCs in the B<sub>N</sub> cultures that contain IFN $\gamma$  or IFN $\gamma$ -producing T  
585 cells compared to cultures that lack IFN $\gamma$ . Thus, IFN $\gamma$  signaling has the potential to drive ASC  
586 development in settings, like autoimmunity and viral infection, where type 1 inflammatory cytokines and  
587 TLR ligands are present.

588  
589 Our data show that increased recovery of ASCs in the IFN $\gamma$ -containing cultures is dependent on IFN $\gamma$   
590 signals that are delivered in conjunction with IL-2 and BCR + TLR7/8 ligands during the initial activation  
591 of B<sub>N</sub> cells. The co-activation of B<sub>N</sub> cells with IFN $\gamma$  and IL-2 + BCR + TLR7/8 ligands results in IFN $\gamma$ -  
592 dependent remodeling of the chromatin and the formation of the T-bet<sup>hi</sup>IRF4<sup>int</sup> pre-ASC subset. These  
593 early IFN $\gamma$ -dependent signals are required for subsequent proliferation and differentiation following  
594 stimulation with IL-21 and TLR7/8 ligand. IFN $\gamma$  is not, in and of itself, a B cell mitogen and has, in fact,  
595 been reported to induce apoptosis of human B cells (64, 65). However, we find that IFN $\gamma$  synergizes with  
596 TLR7/8 ligand signals to promote multiple rounds of B cell proliferation – an important prerequisite of  
597 ASC differentiation (66). Although *in vitro* experiments using human B cells show that IFN $\gamma$  can synergize  
598 with TLR7 and CD40 signals to promote upregulation of Bcl6 and the acquisition of a germinal center-  
599 like phenotype (21), there are no reports of IFN $\gamma$  and TLR7/8 signals cooperating to promote human B  
600 cell proliferation or differentiation into ASCs. By contrast, it is well appreciated that IFN $\alpha$ -directed signals  
601 can enhance TLR7-mediated human B cell proliferation and differentiation (67, 68). Given that there is  
602 considerable overlap between genes regulated by IFN $\alpha$  and IFN $\gamma$  (9), it is possible that IFN $\alpha$  and IFN $\gamma$   
603 may augment TLR7 signaling in human B cells by similar mechanisms.

604  
605 Our *in vitro* data suggest at least three ways in which early IFN $\gamma$  priming signals promote subsequent IL-  
606 21-dependent ASC differentiation. First, we show that IFN $\gamma$  signals, particularly when combined with IL-  
607 2, promote global epigenetic alterations in chromatin accessibility of BCR + TLR7/8 ligand activated B<sub>N</sub>  
608 cells. These epigenetic changes are associated with increased chromatin accessibility surrounding NF-  
609  $\kappa$ B, STAT5 and T-bet binding sites. While it is not particularly surprising that IFN $\gamma$  signaling induces  
610 increased T-bet expression and alterations in chromatin accessibility around T-bet binding sites (see e.g.  
611 (69)), the finding that accessibility surrounding NF- $\kappa$ B and STAT5 binding motifs is also initiated in an  
612 IFN $\gamma$ -dependent manner in B cells suggests that IFN $\gamma$  likely augments TLR- and IL-2-dependent  
613 activation of NF- $\kappa$ B and STAT5, thereby allowing these transcription factors to reshape the B cell  
614 epigenome to favor robust B cell proliferation and differentiation. This result is consistent with data

615 examining CD8 T cells that showed that IL-2R/STAT5 signaling is important for expression of BLIMP1  
616 and that BLIMP1 and T-bet cooperate to induce effector cell differentiation (70). Second, we show that  
617 IFN $\gamma$  promotes commitment to the ASC lineage by regulating two key ASC transcription factors (41), IRF4  
618 and BLIMP1. Indeed, our data suggest that IFN $\gamma$  promotes remodeling of the B cell epigenome to an ASC  
619 permissive state by: (i) regulating chromatin accessibility surrounding IRF4 and BLIMP1 binding sites  
620 within regulatory regions in the genome of the activated B<sub>N</sub> cells; (ii) promoting chromatin accessibility  
621 within the *PRDM1* (BLIMP1) locus; and (iii) inducing IRF4 expression by the activated B<sub>N</sub> cells. Finally,  
622 we demonstrate that IFN $\gamma$  signals alter chromatin accessibility within the *IL21R* locus of the activated B<sub>N</sub>  
623 cells and that this change in accessibility is associated with IFN $\gamma$ -dependent, increased expression of the  
624 IL-21R by the activated B<sub>N</sub> cells and with increased responsiveness of these cells to IL-21 as measured  
625 by phosphorylation of STAT3. While the important role for IL-21 in human B cell differentiation is well  
626 appreciated (45, 46), this is the first time, to our knowledge, that IFN $\gamma$  signals have been shown to poise  
627 human B<sub>N</sub> cells to respond to subsequent IL-21 signals.

628

629 We show that IFN $\gamma$  signaling is necessary for upregulation of T-bet by B<sub>N</sub> cells and changes in chromatin  
630 accessibility surrounding T-bet binding motifs. Given the known role for T-bet in controlling the  
631 recruitment of chromatin modifying enzymes like Jmjd3 H3K27 demethylases and Set7/9 H3K4  
632 methyltransferases (14) to DNA, it is possible that the IFN $\gamma$ -induced changes in chromatin accessibility,  
633 may be due, at least in part, to T-bet. Importantly, T-bet binding motifs are found in the IFN $\gamma$ -dependent  
634 differentially accessible region (DAR) that is present in the *IL21R* locus of IFN $\gamma$ -activated human B cells.  
635 Moreover, this IFN $\gamma$ -dependent, T-bet motif containing DAR in the *IL21R* locus maps to a known site of  
636 T-bet binding in B cells, as determined by T-bet ChIP-seq (56). Similarly, the DARs that we identified in  
637 the *PRDM1* locus of the BCR, TLR7/8, IFN $\gamma$  and IL-2 activated B<sub>N</sub> cells also align with T-bet binding sites  
638 identified by ChIP-seq in B cells (56). While it is tempting to speculate that T-bet may directly promote  
639 expression of *PRDM1*, it is reported that IL-2R-activated STAT5, and not T-bet, which is responsible for  
640 inducing BLIMP1 in CD8 T cells (70). Therefore, it is possible that upregulation of *PRDM1* in B cells is  
641 also controlled by STAT5 and that T-bet's key role is in regulating *IL21R* expression levels.

642

643 The IFN $\gamma$ -induced T-bet<sup>hi</sup>IRF4<sup>int</sup> pre-ASC population that we identified in our *in vitro* studies is very similar  
644 at phenotypic, molecular and functional levels to the T-bet<sup>hi</sup> DN2 subset that is expanded in SLE patients.  
645 Since the expansion of the T-bet<sup>hi</sup> DN2 cells in SLE patients correlates with systemic levels of IFN $\gamma$  and  
646 IFN $\gamma$ -induced cytokines, we think it likely that these cells arise in an IFN $\gamma$ -dependent fashion in the  
647 patients and more importantly, that these cells have undergone IFN $\gamma$ -dependent epigenetic programming.  
648 In support of this possibility, we demonstrate that the IFN $\gamma$ -directed changes in chromatin accessibility  
649 within the *IL21R* and *PRDM1* loci seen in the *in vitro* generated T-bet<sup>hi</sup>IRF4<sup>int</sup> pre-ASCs are also found in

650 T-bet<sup>hi</sup> DN2 cells isolated from SLE patients. Moreover, we show that B<sub>N</sub> cells from SLE patients can,  
651 when activated in the presence of BCR and TLR ligands plus IFN $\gamma$  and IL-2, develop into pre-ASCs that  
652 are very similar to the DN2 subset. Together, these results suggest that the SLE T-bet<sup>hi</sup> DN2 cells are  
653 likely to represent antigen-activated, IFN $\gamma$ -programmed primary effectors rather than atypical memory B  
654 cells (29). This hypothesis is consistent with published data (18, 19) showing that T-bet<sup>hi</sup> DN2 cells, like  
655 B<sub>N</sub> cells (71), require IL-21-driven STAT3 signals to differentiate and with our data showing that SLE  
656 patient T-bet<sup>hi</sup> DN2 cells, unlike B<sub>N</sub> cells, rapidly differentiate into ASCs in the absence of BCR signaling.  
657 Thus, our data suggest a model in which B<sub>N</sub> cells from SLE patients are activated in the autoimmune  
658 microenvironment by autoantigen, endogenous TLR ligands and IFN $\gamma$  and then go on to receive IL-21  
659 differentiation signals, presumably delivered by T cells. While these interactions could take place in  
660 primary germinal center reactions, our results are also consistent with data from mouse SLE models  
661 showing that autoAb-producing ASCs can develop in a TLR-dependent and T cell-driven manner outside  
662 of the germinal center within extrafollicular sites (72). Intriguingly, recent data from autoimmune patients  
663 show that IL-21 and IFN $\gamma$  co-producing Th cells (TpH cells) are localized in the perifollicular region of  
664 secondary lymphoid tissues in autoimmune patients (73).

665

666 One of our key findings is that IFN $\gamma$ -augmented ASC formation and recovery is highly reliant on TLR7/8  
667 activation by its RNA and RNA/protein ligands, which are derived from viral pathogens and dead and  
668 dying cells (3). Signaling through TLR7 is known to be important in SLE as prior studies reveal that SNPs  
669 in the human *TLR7* locus (74) and overexpression of TLR7 in mice (75) are associated with increased  
670 SLE susceptibility while deletion of TLR7 protects mice from the development of SLE (76). Our data show  
671 that deletion of the IFN $\gamma$ -inducible transcription factor T-bet in B lineage cells prevents autoAb responses  
672 in a mouse model (75) of TLR7-dependent SLE. Moreover, our data shows that B cell intrinsic IFN $\gamma$   
673 signaling induces a TLR7/8 hyperresponsive state in human B cells. This finding did not appear to be  
674 due to IFN $\gamma$ -dependent changes in the expression of TLR7 by the B cells (data not shown). Rather, we  
675 found that IFN $\gamma$ -exposed B<sub>N</sub> cells can respond and differentiate into ASCs when exposed to 100-fold  
676 lower concentration of TLR7/8 ligands than normally used to activate B cells. Given that we observed  
677 that even low levels of IFN $\gamma$  are sufficient to synergize with suboptimal concentrations of TLR7/8 ligands,  
678 we predict that B cells from autoimmune patients with detectable systemic levels IFN $\gamma$  will be highly  
679 sensitive to the presence of endogenous and exogenously derived TLR7 ligands. In support of this  
680 hypothesis, phosphorylation of MapK and Erk is increased in TLR7/8-stimulated SLE T-bet<sup>hi</sup> DN2 cells  
681 (19) and we found that even relatively low concentrations of IFN $\gamma$  in our co-cultures containing Th2 and  
682 B<sub>N</sub> cells was sufficient to induce increased ASC recovery in the cultures (not shown). Thus, we predict  
683 that TLR7-driven ASC responses are likely to be exacerbated in individuals with IFN $\gamma$ -associated  
684 inflammatory disease.

685

686 Our data showing that IFN $\gamma$  enhances TLR7/8 signaling in B cells suggest that SLE patients who have  
687 higher systemic levels of IFN $\gamma$  and expansion of the T-bet<sup>hi</sup> DN2 population are likely to have more severe  
688 disease. Consistent with this, we (Fig. 1 and (19)) and others (18) show that the size of this population  
689 correlates with autoAb titers and with disease activity in SLE patients. Interestingly, prior reports  
690 demonstrate that the T-bet<sup>hi</sup> DN2 cells and T-bet<sup>hi</sup> CD11c<sup>hi</sup> ABCs are most expanded in African American  
691 SLE patients and in patients with higher disease activity (18, 19). Similarly, we found that the patients in  
692 our cohort with the most elevated levels of IFN $\gamma$  and the largest expansion of the T-bet<sup>hi</sup> DN2 cells were  
693 all African American while Caucasian patients were uniformly low for both circulating T-bet<sup>hi</sup> DN2 cells  
694 and systemic IFN $\gamma$  (data not shown). However, it is important to note that T-bet<sup>hi</sup> DN2 cells are unlikely  
695 to represent a purely “pathogenic” population as we also identified an inducible population of vaccine-  
696 specific T-bet<sup>hi</sup> DN2 cells in healthy individuals who were immunized with inactivated influenza virus (data  
697 not shown). Similarly, others have reported a T-bet expressing effector switched memory subset  
698 (CD27<sup>+</sup>CD21<sup>lo</sup>) with pre-ASC attributes, which is induced following vaccination or infection (33, 40). Thus,  
699 we speculate that the T-bet<sup>hi</sup> primary effector and memory B cell subsets, which are found in HD and  
700 autoimmune patients in the settings of acute and chronic inflammation driven by vaccination, infection,  
701 autoimmunity and aging, are formed in an IFN $\gamma$ -dependent manner and likely represent a pool of pre-  
702 ASCs that are poised to differentiate.

703

704 In summary, we demonstrate that IFN $\gamma$  is critical for the formation of a T-bet<sup>hi</sup>IRF4<sup>int</sup> pre-ASC population  
705 that is remarkably similar to the T-bet<sup>hi</sup> DN2 cells that accumulate in SLE patients who present with high  
706 autoAb titers, elevated disease activity and increased systemic levels of IFN $\gamma$ . We show that IFN $\gamma$  signals,  
707 particularly when combined with IL-2 and TLR7/8 + BCR ligands, initiate epigenetic reprogramming of  
708 human B cells – changes which poise the activated B<sub>N</sub> cells to respond to IL-21 and fully commit to the  
709 ASC lineage. Based on these results, we predict that blocking IFN $\gamma$  signaling in SLE patients should  
710 curtail development of T-bet<sup>hi</sup> DN2 pre-ASCs, which may result in decreased autoAb production and  
711 reduced disease activity. Interestingly, and in opposition to our hypothesis, results from a phase I trial  
712 examining IFN $\gamma$  blockade in SLE patients did not reveal a therapeutic benefit (77). However, no African  
713 Americans SLE patients with nephritis were included in the study (77) and, given the data showing that  
714 T-bet<sup>hi</sup> DN2 cells are most expanded in African American patients with severe disease (18, 19) and our  
715 data suggesting that these cells develop in an IFN $\gamma$ -dependent manner, we propose that future studies  
716 evaluating the efficacy of IFN $\gamma$  blockade in SLE patients should be focused specifically on those patients  
717 who present with elevated IFN $\gamma$  levels and significant expansion of the T-bet expressing DN2 pre-ASC  
718 population.

719

720 **Materials and Methods**

721

722 **Key Resources Table**

| Reagent type (species) or resource | Designation                                                                         | Source or reference                    | Identifiers       | Additional information |
|------------------------------------|-------------------------------------------------------------------------------------|----------------------------------------|-------------------|------------------------|
| <b>Commercial Assays or Kits</b>   |                                                                                     |                                        |                   |                        |
| commercial assay or kit            | Human Anti-SM igG ELISA Kit                                                         | Alpha Diagnostic International         | RRID:3300-100-SMG |                        |
| commercial assay or kit            | Milliplex MAP Human Cytokine/Chemokine Magnetic Bead Panel                          | Millipore                              | RRID:HCYTOMAG-60K |                        |
| commercial assay or kit            | Milliplex MAP Human Th17 Magnetic Bead Panel                                        | Millipore                              | RRID:HTH17MAG-14K |                        |
| commercial assay or kit            | Fixable Aqua Dead Cells Stain Kit                                                   | Life Technologies                      | RRID:34966        |                        |
| commercial assay or kit            | CellTrace Violet                                                                    | Invitrogen by Thermo Fisher Scientific | RRID:C34557       |                        |
| commercial assay or kit            | Transcription Factor PhosphoPlus Buffer Set                                         | BD Pharmigen                           | RRID:565575       |                        |
| commercial assay or kit            | Foxp3/Transcription Factor Staining Buffer Set                                      | eBioscience                            | RRID:00-5523-00   |                        |
| commercial assay or kit            | EasySep Human Naïve B Cell Enrichment Set                                           | STEMCELL Technologies                  | RRID:19254        |                        |
| commercial assay or kit            | EasySep Human Naïve CD4+ T Cell Isolation Kit                                       | STEMCELL Technologies                  | RRID:19555        |                        |
| commercial assay or kit            | Ainti-IgD Microbeads human                                                          | Miltenyi Biotec                        | RRID:130-103-775  |                        |
| commercial assay or kit            | HA, Sterile Clear Plates 0.45microm Surfactant-Free, Mixed Cellulose Ester Membrane | Millipore                              | RRID:MAHAS4510    |                        |
| <b>Cytokines For Culture</b>       |                                                                                     |                                        |                   |                        |
| peptide, recombinant protein       | Recombinant Human IFN-gamma                                                         | R&D                                    | RRID:285-IF       | 20 ng/ml               |
| peptide, recombinant protein       | Recombinant Human IL4                                                               | R&D                                    | RRID:204-IL       | 20 ng/ml               |

|                                                     |                                                    |                     |                 |          |
|-----------------------------------------------------|----------------------------------------------------|---------------------|-----------------|----------|
| peptide, recombinant protein                        | Recombinant Human IL12                             | R&D                 | RRID:219-IL     | 1 ng/ml  |
| peptide, recombinant protein                        | Recombinant Human IL21                             | Peprotech           | RRID:200-21     | 10 ng/ml |
| peptide, recombinant protein                        | Recombinant Human Baff                             | Peprotech           | RRID:310-13     | 10 ng/ml |
| peptide, recombinant protein                        | Recombinant Human IL2                              | Peprotech           | RRID:200-02     | 50 U/ml  |
| <b>Chemical Compounds/Drugs For Culture or Flow</b> |                                                    |                     |                 |          |
| chemical compound, drug                             | R848                                               | InvivoGen           | RRID:tlrl-r848  | 5 mg/ml  |
| chemical compound, drug                             | Iscove's DMEM, 1X                                  | Corning Mediatech   | RRID:10-016-CV  |          |
| chemical compound, drug                             | RPMI-1640                                          | Lonza               | RRID:12-702F    |          |
| chemical compound, drug                             | MEM Nonessential Amino Acids                       | Corning Mediatech   | RRID:25-025-CI  |          |
| chemical compound, drug                             | Sodium Pyruvate 100mM Solution                     | GE Life sciences    | RRID:SH30239.01 |          |
| chemical compound, drug                             | Penicillin Streptomycin Solution                   | Corning             | RRID:30-002-CI  |          |
| chemical compound, drug                             | Gentamicin                                         | Gibco               | RRID:15750-060  |          |
| chemical compound, drug                             | 7-amino-AMD                                        | Calbiochem          | RRID:129935     |          |
| chemical compound, drug                             | Fluoresbrite Carboxylate YG 10 microm Microspheres | Polysciences        | RRID:18142      |          |
| chemical compound, drug                             | DPBS, 1X                                           | Corning Mediatech   | RRID:21-031-CV  |          |
| chemical compound, drug                             | EDTA                                               | UltraPure 0.5M EDTA | RRID:15575-038  |          |
| chemical compound, drug                             | HEPES Buffer 1M Solution                           | Corning Mediatech   | RRID:25-060-CI  |          |
| <b>Chemical Compounds/Drugs For ELISPOT</b>         |                                                    |                     |                 |          |
| chemical compound, drug                             | BCIP/NBT Alkaline Phosphatase Substrate/membrane   | Moss, Inc           | RRID:NBTM-1000  |          |
| <b>Antibodies For Culture</b>                       |                                                    |                     |                 |          |
| antibody                                            | Purified anti-human CD3 (mouse IgG1)               | Biolegend           | RRID:300414     | 5 mg/ml  |
| antibody                                            | Purified anti-human CD28 (mouse IgG1)              | Biolegend           | RRID:302914     | 5 mg/ml  |
| antibody                                            | Human IL-12 Antibody (goat IgG)                    | R&D                 | RRID:AB-219-NA  | 10 mg/ml |



|                               |                                                                                                                 |                        |                  |          |
|-------------------------------|-----------------------------------------------------------------------------------------------------------------|------------------------|------------------|----------|
| antibody                      | Human IFN-gamma Antibody (goat IgG)                                                                             | R&D                    | RRID:AB-285-NA   | 10 mg/ml |
| antibody                      | Human IL-4 Antibody (goat IgG)                                                                                  | R&D                    | RRID:AB-204-NA   | 10 mg/ml |
| antibody                      | AffiniPure F(ab') <sub>2</sub> Fragment Goat Anti-Human IgM, Fc $\mu$ fragment specific                         | Jackson ImmunoResearch | RRID:109-006-129 | 5 mg/ml  |
| antibody                      | AffiniPure F(ab') <sub>2</sub> Fragment Goat Anti-Human IgG, F(ab') <sub>2</sub> fragment specific              | Jackson ImmunoResearch | RRID:109-006-097 | 5 mg/ml  |
| antibody                      | AffiniPure F(ab') <sub>2</sub> Fragment Goat Anti-Human Serum IgA, $\alpha$ chain specific                      | Jackson ImmunoResearch | RRID:109-006-011 | 5 mg/ml  |
| <b>Antibodies For ELISPOT</b> |                                                                                                                 |                        |                  |          |
| antibody                      | AffiniPure Goat Anti-Human IgG (H+L)                                                                            | Jackson ImmunoResearch | RRID:109-005-088 | 2 mg/ml  |
| antibody                      | Alkaline Phosphatase AffinitiPure F(ab') <sub>2</sub> Fragment Goat, Anti-Human IgG, Fc-gamma Fragment Specific | Jackson ImmunoResearch | RRID:109-056-098 | (1:1000) |
| <b>Others For Culture</b>     |                                                                                                                 |                        |                  |          |
| other                         | Human Serum AB                                                                                                  | GemCell                | RRID:100-512     |          |
| other                         | Fetal Bovine Serum                                                                                              | Biowest                | RRID:S1690       |          |
| <b>Antibodies For Flow</b>    |                                                                                                                 |                        |                  |          |
| antibody                      | Fitc Mouse Anti-Human <b>CD3</b> (clone <b>HIT3a</b> )                                                          | BD Biosciences         | RRID:555339      | (1:200)  |
| antibody                      | PercP/Cy5.5 Mouse Anti-Human <b>CD3</b> (clone <b>OKT3</b> )                                                    | eBioscience            | RRID:45-0037-71  | (1:200)  |
| antibody                      | Fitc Mouse Anti-Human <b>CD4</b> (clone <b>OKT4</b> )                                                           | eBioscience            | RRID:11-0048-80  | (1:400)  |
| antibody                      | PE Mouse Anti-Human <b>CD4</b> (clone <b>OKT4</b> )                                                             | Biologend              | RRID:317410      | (1:200)  |
| antibody                      | PercP/Cy5.5 Mouse Anti-Human <b>CD4</b> (clone <b>OKT4</b> )                                                    | eBioscience            | RRID:45-0048-42  | (1:200)  |
| antibody                      | BV510 Mouse Anti-Human <b>CD4</b> (clone <b>OKT4</b> )                                                          | Biologend              | RRID:317444      | (1:100)  |

|          |                                                                 |               |                  |         |
|----------|-----------------------------------------------------------------|---------------|------------------|---------|
| antibody | Fitc Mouse Anti-Human <b>CD11c</b> (clone <b>Bu15</b> )         | Biolegend     | RRID:337214      | (1:200) |
| antibody | PE Mouse Anti-Human <b>CD11c</b> (clone <b>Bu15</b> )           | Biolegend     | RRID:337205      | (1:400) |
| antibody | PercP/Cy5.5 Mouse Anti-Human <b>CD14</b> (clone <b>HCD14</b> )  | Biolegend     | RRID:325621      | (1:200) |
| antibody | Fitc Mouse Anti-Human <b>CD19</b> (clone <b>LT19</b> )          | Miltenyi      | RRID:302256      | (1:100) |
| antibody | PE Mouse Anti-Human <b>CD19</b> (clone <b>HIB19</b> )           | Biolegend     | RRID:302208      | (1:200) |
| antibody | PercP/Cy5.5 Mouse Anti-Human <b>CD19</b> (clone <b>HIB19</b> )  | Biolegend     | RRID:302230      | (1:100) |
| antibody | APC Mouse Anti-Human <b>CD19</b> (clone <b>HIB19</b> )          | BD Pharmingen | RRID:555415      | (1:200) |
| antibody | APC-H7 Mouse Anti-Human <b>CD19</b> (clone <b>HIB19</b> )       | eBioscience   | RRID:560727      | (1:100) |
| antibody | BV421 Mouse Anti-Human <b>CD19</b> (clone <b>HIB19</b> )        | Biolegend     | RRID:302234      | (1:200) |
| antibody | V500 Mouse Anti-Human <b>CD19</b> (clone <b>HIB19</b> )         | BD Horizon    | RRID:561121      | (1:100) |
| antibody | PercP/Cy5.5 Mouse Anti-Human <b>CD21</b> (clone <b>Bu32</b> )   | Biolegend     | RRID:354908      | (1:100) |
| antibody | Fitc Mouse Anti-Human <b>CD23</b> (clone <b>M-L23.4</b> )       | Miltenyi      | RRID:130-099-365 | (1:100) |
| antibody | PE Mouse Anti-Human <b>CD23</b> (clone <b>EBVCS-5</b> )         | Biolegend     | RRID:338507      | (1:200) |
| antibody | APC Mouse Anti-Human <b>CD23</b> (clone <b>M-L233</b> )         | BD Pharmingen | RRID:558690      | (1:200) |
| antibody | Fitc Mouse Anti-Human <b>CD27</b> (clone <b>M-T271</b> )        | Biolegend     | RRID:356404      | (1:100) |
| antibody | PercP/Cy5.5 Mouse Anti-Human <b>CD27</b> (clone <b>M-T271</b> ) | Biolegend     | RRID:356408      | (1:100) |

|          |                                                                  |             |                  |          |
|----------|------------------------------------------------------------------|-------------|------------------|----------|
| antibody | APC Mouse Anti-Human <b>CD27</b> (clone <b>M-T271</b> )          | Biolegend   | RRID:356410      | (1:200)  |
| antibody | APC-H7 Mouse Anti-Human <b>CD27</b> (clone <b>M-T271</b> )       | eBioscience | RRID:560222      | (1:100)  |
| antibody | BV421 Mouse Anti-Human <b>CD27</b> (clone <b>M-T271</b> )        | Biolegend   | RRID:356418      | (1:200)  |
| antibody | PE/Cy7 Mouse Anti-Human <b>CD38</b> (clone <b>HIT2</b> )         | eBioscience | RRID:25-0389-42  | (1:1200) |
| antibody | PercP/Cy5.5 Mouse Anti-Human <b>CD56</b> (clone <b>5.IH11</b> )  | Biolegend   | RRID:362505      | (1:100)  |
| antibody | PE Mouse Anti-Human <b>FcRL5</b> (clone <b>509F6</b> )           | Biolegend   | RRID:340304      | (1:200)  |
| antibody | eFluor660 Mouse Anti-Human <b>FcRL5</b> (clone <b>509F6</b> )    | eBioscience | RRID:50-3078-42  | (1:200)  |
| antibody | APC Mouse Anti-Human <b>FcRL5</b> (clone <b>509F6</b> )          | eBioscience | RRID:340306      | (1:200)  |
| antibody | PE Mouse Anti-Human <b>CXCR3</b> (clone <b>CEW33D</b> )          | eBioscience | RRID:12-1839-42  | (1:200)  |
| antibody | PE Mouse Anti-Human <b>CXCR3</b> (clone <b>49801</b> )           | R&D         | RRID:FAB160P     | (1:200)  |
| antibody | Fitc Mouse Anti-Human <b>CXCR5</b> (clone <b>J252D4</b> )        | Biolegend   | RRID:356914      | (1:100)  |
| antibody | PE Mouse Anti-Human <b>CXCR5</b> (clone <b>J252D4</b> )          | Biolegend   | RRID:356904      | (1:200)  |
| antibody | PercP-Cy5.5 Mouse Anti-Human <b>CXCR5</b> (clone <b>J252D4</b> ) | Biolegend   | RRID:356910      | (1:100)  |
| antibody | APC Mouse Anti-Human <b>CXCR5</b> (clone <b>J252D4</b> )         | Biolegend   | RRID:356907      | (1:200)  |
| antibody | BV421 Mouse Anti-Human <b>CXCR5</b> (clone <b>J252D4</b> )       | Biolegend   | RRID:356920      | (1:200)  |
| antibody | Fitc Mouse Anti-Human <b>IgD</b> (clone <b>IgD26</b> )           | Miltenyi    | RRID:130-099-633 | (1:100)  |

|          |                                                                   |               |                  |         |
|----------|-------------------------------------------------------------------|---------------|------------------|---------|
| antibody | Fitc Mouse Anti-Human <b>IgD</b> (clone <b>IA6-2</b> )            | BD Pharmingen | RRID:555778      | (1:100) |
| antibody | BV421 Mouse Anti-Human <b>IgD</b> (clone <b>IA6-2</b> )           | Biolegend     | RRID:348226      | (1:200) |
| antibody | BV510 Mouse Anti-Human <b>IgD</b> (clone <b>IA6-2</b> )           | BD Horizon    | RRID:348226      | (1:100) |
| antibody | APC Mouse Anti-Human <b>IgM</b> (clone <b>MHM-88</b> )            | Biolegend     | RRID:314509      | (1:200) |
| antibody | Fitc Mouse Anti-Human <b>IgG</b> (clone <b>IS11-3B2.2.3</b> )     | Miltenyi      | RRID:130-099-229 | (1:200) |
| antibody | PE Mouse Anti-Human <b>IgG</b> (clone <b>IS11-3B2.2.3</b> )       | Miltenyi      | RRID:130-099-201 | (1:200) |
| antibody | PE Mouse Anti-Human <b>IgA(1)</b> (clone <b>IS11-8E10</b> )       | Miltenyi      | RRID:130-099-108 | (1:200) |
| antibody | PE Mouse Anti-Human <b>IgA(2)</b> (clone <b>IS11-21E11</b> )      | Miltenyi      | RRID:130-100-316 | (1:200) |
| antibody | Fitc Mouse Anti-Human/Mouse <b>T-bet</b> (clone <b>4B10</b> )     | Biolegend     | RRID:644812      | (1:100) |
| antibody | APC Mouse Anti-Human/Mouse <b>T-bet</b> (clone <b>4B10</b> )      | Biolegend     | RRID:644814      | (1:100) |
| antibody | AF488 Mouse Anti-Human/Mouse <b>GATA</b> (clone <b>L50-823</b> )  | BD Pharmingen | RRID:560163      | (1:100) |
| antibody | PE Rat Anti-Human/Mouse <b>Blimp-1</b> (clone <b>6D3</b> )        | BD Pharmingen | RRID:564702      | (1:200) |
| antibody | PE Rat Anti-Human/Mouse <b>IRF4</b> (clone <b>IRF4.3E4</b> )      | Biolegend     | RRID:646403      | (1:600) |
| antibody | APC Mouse Anti-Human <b>IL21</b> (clone <b>3A3-N2</b> )           | Biolegend     | RRID:513007      | (1:100) |
| antibody | APC Mouse Anti-Human <b>IL21R</b> (clone <b>2G1-K12</b> )         | Biolegend     | RRID:347807      | (1:50)  |
| antibody | BV421 Mouse Anti-Human/Mouse <b>pSTAT3</b> (clone <b>13A3-1</b> ) | Biolegend     | RRID:651009      | (1:100) |

724 **Human Subjects and samples.** The UAB and Emory Human Subjects Institutional Review Board  
725 approved all study protocols for HD (UAB) and SLE patients (UAB and Emory). All subjects gave written  
726 informed consent for participation and provided peripheral blood for analysis. SLE patients were  
727 recruited in collaboration with the outpatient facilities of the Division of Rheumatology and Clinical  
728 Immunology at UAB or the Division of Rheumatology at Emory. UAB and Emory SLE patients met a  
729 minimum of three ACR criteria for the classification of SLE. HDs were self-identified and recruited through  
730 the UAB Center for Clinical and Translational Science and the Alabama Vaccine Research Center  
731 (AVCR). The UAB Comprehensive Cancer Center Tissue Procurement Core Facility provided remnant  
732 tonsil tissue samples from patients undergoing routine tonsillectomies.

733

734 **Lymphocyte and plasma isolation.** Peripheral blood (PB) from human subjects was collected in K2-  
735 EDTA tubes (BD Bioscience). Human tonsil tissue was dissected, digested for 30 min at 37°C with DNase  
736 (150 U/ml, Sigma) and collagenase (1.25 mg/ml, Sigma), and then passed through a 70µm cell strainer  
737 (Falcon). Human PBMCs and plasma from blood samples and low-density tonsil mononuclear cells were  
738 separated by density gradient centrifugation over Lymphocyte Separation Medium (CellGro). Red blood  
739 cells were lysed with Ammonium Chloride Solution (StemCell). Plasma was fractionated in aliquots and  
740 stored at -80°C. Human PBMCs and tonsil mononuclear cells were either used immediately or were  
741 cryopreserved at -150°C.

742

743 **Human lymphocyte purification.** Naïve CD4<sup>+</sup> T cells and CD19<sup>+</sup> B cells were isolated from human  
744 PBMCs or tonsils using EasySep™ enrichment kits (StemCell). B<sub>N</sub> cells were then positively selected  
745 using anti-IgD microbeads (Miltenyi). B cell subsets were sort-purified from PBMCs and tonsils as  
746 described in text.

747

748 **Generation of Th1 and Th2 cells.** Polarized CD4<sup>+</sup> effector T cells were generated by activating purified  
749 HD naïve CD4 T cells with plate-bound anti-CD3 (UCHT1) and anti-CD28 (CD28.2) (both 5µg/ml,  
750 Biologend) in the presence of IL-2 (50U/ml), IL-12 (1ng/ml) and anti-IL4 (10µg/ml) (Th1 conditions) or IL-  
751 2 (50U/ml), IL-4 (20ng/ml), anti-IL12 (10µg/ml) and anti-IFNγ (10µg/ml) (Th2 conditions). Cells were  
752 transferred into fresh media on day 3 and IL-2 was added, as needed. Cells were re-activated every 7  
753 days using the same cultures conditions for 3 rounds of polarization. All cytokines and Abs except IL-2  
754 (Peprotech) were purchased from R&D and T cell polarizing media contained Iscove's DMEM  
755 supplemented with penicillin (200µg/ml), streptomycin (200µg/ml), gentamicin (40µg/ml), 10% FBS and  
756 5% human serum blood type AB.

757

758 **T/B co-cultures.** Purified B cell subsets from HD or SLE patients were co-cultured in B cell media in the  
759 presence of IL-2 (50U/ml) ± IL-21 (10ng/ml) with allogeneic *in vitro* generated Th1 or Th2 effectors

760 (0.6x10<sup>6</sup> cells/ml, ratio 5B:1T) for 5-6 days, as indicated. B cell media contained Iscove's DMEM  
761 supplemented with penicillin (200µg/ml), streptomycin (200µg/ml), gentamicin (40µg/ml), 10% FBS, and  
762 insulin (5µg/ml; Santa Cruz Biotechnology).

763

764 **B cell activation with defined stimuli.** Purified B cell subsets isolated from the tonsil or blood of HD or  
765 SLE patients were cultured (1x10<sup>6</sup> cells/ml) for 3 days with 5µg/ml anti-Ig (Jackson ImmunoResearch),  
766 5µg/ml R848 (InvivoGen), 50U/ml IL-2, 10ng/ml Baff, 10ng/ml IL-21 (Peprotech) and 20ng/ml IFN $\gamma$  (R&D)  
767 (Step 1). Cells were either directly analyzed or washed and recultured (2x10<sup>5</sup> cells/ml) for an additional  
768 3 days with the same stimuli (Step 2). The number of ASCs and total cells recovered in cultures on day  
769 6 were determined and then normalized based on cell input. In some experiments, anti-Ig, R848, IL-21,  
770 IL-2, IFN $\gamma$  or Baff were omitted from the cultures during Step 1, or Step 2 or both steps. In other  
771 experiments, the concentration of R848 in Step 1 and Step 2 and/or the concentration of IFN $\gamma$  in Step1  
772 was varied, as indicated in the text. In some experiments, B cell subsets isolated from blood of SLE  
773 patients and HD were stimulated for 2.5-6 days with R848 and IL-21, IL-2, Baff and IFN $\gamma$ .

774

775 **STAT3 phosphorylation assays.** HD B<sub>N</sub> cells were cultured with 5µg/ml anti-Ig and 5µg/ml R848 alone  
776 (Be.0) or in combination with IFN $\gamma$  (Be.IFN $\gamma$ ), IL2 (Be.IL2), or IL2 plus IFN $\gamma$  (Be. $\gamma$ 2) and analyzed on day  
777 3 or were washed and recultured in the presence of IL21 and R848 for one additional day and analyzed  
778 on day 4. On day 3 or 4, cells were washed and restimulated with medium alone or with IL21 (10ng/ml)  
779 for 20 min at 37°C. The cells were fixed and permeabilized with BD Transcription Factor Phospho Buffer  
780 Set and intracellular staining with anti phospho-STAT3 was performed.

781

782 ***In vitro* B cell proliferation.** Purified B cell subsets (1-5x10<sup>6</sup> cells/ml) were stained for 10 min at 37°C  
783 with PBS diluted CellTrace™ Violet (Molecular Probes, ThermoFisher). The cells were washed and either  
784 used in T effector co-culture experiments or were cultured in the presence of defined stimuli.

785

786 ***In vitro* ASC differentiation.** B<sub>N</sub> cells were co-cultured with *in vitro* generated Th1 or Th2 cells plus IL-2  
787 and IL-21. On day 6 of the co-culture B<sub>DN</sub> cells from both cultures were sort-purified and then cultured in  
788 0.22µM-filtered conditioned media (media collected from the original T/B co-cultures). ASCs were  
789 enumerated after 18 hrs by flow cytometry.

790

791 **Cytokine measurements.** Th1 and Th2 cells were restimulated with platebound anti-CD3 and anti-CD28  
792 (both 5µg/ml). Cytokine levels in restimulated T cell cultures and SLE patient plasma samples was  
793 measured using Milliplex® MAG Human Cytokine/Chemokine Immunoassays (Millipore).

794

795 **ELISPOT.** Serial diluted B cells were transferred directly to anti-IgG (Jackson ImmunoResearch) coated  
796 ELISPOT plates (Millipore) for 6 hrs. Bound Ab was detected with alkaline phosphatase-conjugated anti-  
797 human IgG (Jackson ImmunoResearch) followed by development with alkaline phosphatase substrate  
798 (Moss, Inc). ELISPOTs were visualized using a CTL ELISPOT reader. The number of spots detected per  
799 well (following correction for non-specific background) was calculated.

800

801 **Anti-SMITH ELISAs.** Anti-Smith IgG autoantibodies in plasma from SLE patients and healthy donors  
802 were detected using the enzymatic immunoassay kit (Alpha Diagnostic) according to the manufacturer  
803 protocol.

804

805 **Flow Cytometry.** Single cell suspensions were blocked with 10 µg/ml FcR blocking mAb 2.4G2 (mouse  
806 cells) or with 2% human serum or human FcR blocking reagent (Miltenyi) (human cells) and then stained  
807 with fluorochrome-conjugated Abs. 7AAD or LIVE/DEAD® Fixable Dead Cell Stain Kits (Molecular  
808 Probes/ThermoFisher) were used to identify live cells. For intracellular staining, cells were stained with  
809 Abs specific for cell surface markers, fixed with formalin solution (neutral buffered, 10%; Sigma) and  
810 permeabilized with 0.1% IGEPAL (Sigma) in the presence of Abs. Alternatively, the transcription factor  
811 and phospho-transcription factor staining buffers (eBioscience) were used. Stained cells were analyzed  
812 using a FACSCanto II (BD Bioscience). Cells were sort-purified with a FACSARIA (BD Biosciences)  
813 located in the UAB Comprehensive Flow Cytometry Core. Analysis was performed using FlowJo v9.9.3  
814 and FlowJo v10.2.

815

816 **RNA-seq library preparation and analysis.** RNA samples were isolated from TRIzol (FisherThermo)  
817 treated sort-purified day 6 Be1 and Be2 IgD<sup>neg</sup>CD27<sup>neg</sup> B cells. 300 ng of total RNA from three biological  
818 replicates per B cell subset was used as input for the KAPA stranded mRNA-seq Kit with mRNA capture  
819 beads (KAPA Biosystems). Libraries were assessed for quality on a bioanalyzer, pooled, and sequenced  
820 using 50 bp paired-end chemistry on a HiSeq2500. Sequencing reads were mapped to the hg19 version  
821 of the human genome using TopHat with the default settings and the hg19 UCSC KnownGene table as  
822 a reference transcriptome. For each gene, the overlap of reads in exons was summarized using the  
823 GenomicRanges package in R/Bioconductor. Genes that contained 2 or more reads in at least 3 samples  
824 were deemed expressed (11598 of 23056) and used as input for edgeR to identify differentially expressed  
825 genes (DEGs). *P*-values were false-discovery rate (FDR) corrected using the Benjamini-Hochberg  
826 method and genes with a FDR of <0.05 were considered significant. Expression data was normalized to  
827 reads per kilobase per million mapped reads (FPKM). Data processing and visualization scripts are  
828 available (78). All RNA-seq data is available from the GEO database under the accession GSE95282.  
829 See also [Supplementary File 1](#).

830

831 **ATAC-seq preparation and analysis.** ATAC-seq data generated from the SLE B cell subsets was  
832 previously reported (19). ATAC-seq analysis on *in vitro* generated B cell was performed on 10,000 Be.0,  
833 Be.IFN $\gamma$ , Be.IL2 or Be. $\gamma$ 2 cells as previously described (79, 80). Sorted cells were resuspended in 25  $\mu$ l  
834 tagmentation reaction buffer (2.5  $\mu$ l Tn5, 1x Tagment DNA Buffer, 0.2% Digitonin) and incubated for 1 hr  
835 at 37°C. Cells were lysed with 25  $\mu$ l 2x Lysis Buffer (300 mM NaCl, 100 mM EDTA, 0.6% SDS, 1.6  $\mu$ g  
836 Proteinase-K) for 30 min at 40°C, low molecular weight DNA was purified by size-selection with SPRI-  
837 beads (Agencourt), and then PCR amplified using Nextera primers with 2x HiFi Polymerase Master Mix  
838 (KAPA Biosystems). Amplified, low molecular weight DNA was isolated using a second SPRI-bead size  
839 selection. Libraries were sequenced using a 50bp paired-end run at the NYU Genome Technology  
840 Center. Raw sequencing reads were mapped to the hg19 version of the human genome using Bowtie  
841 (81) with the default settings. Duplicate reads were marked using the Picard Tools MarkDuplicates  
842 function (<http://broadinstitute.github.io/picard/>) and eliminated from downstream analyses. Enriched  
843 accessible peaks were identified using MACS2 (82) with the default settings. Differentially accessible  
844 regions were identified using edgeR v3.18.1 (83) and a generalized linear model. Read counts for all  
845 peaks were annotated for each sample from the bam file using the Genomic Ranges (84) R/Bioconductor  
846 package and normalized to reads per million (rpm) as previously described (80). Peaks with a greater  
847 than 2-fold change and FDR < 0.05 between comparisons were termed significant. Genomic and motif  
848 annotations were computed for ATAC-seq peaks using the HOMER (55) `annotatePeaks.pl` script. The  
849 `findMotifsGenome.pl` function of HOMER v4.8.2 (55) was used to identify motifs enriched in DAR and the  
850 'de novo' output was used for downstream analysis. To generate motif footprints, the motifs occurring in  
851 peaks were annotated with the HOMER v4.8.2 `annotatePeaks.pl` function (55) using the options '-size  
852 given'. The read depth at the motif and surrounding sequence was computed using the GenomicRanges  
853 v1.22.4 (84) package and custom scripts in R/Bioconductor. All other analyses and data display were  
854 performed using R/Bioconductor with custom scripts (78). ATAC-seq data has been deposited in the  
855 NCBI GEO database under accession number GSE119726. See also [Supplementary Files 3-5](#) for  
856 complete list of DARs and for analysis of TF motif enrichment in the ATAC-seq dataset.

857

858 **GSEA.** For gene set enrichment analysis samples were submitted to the GSEA program  
859 (<http://software.broadinstitute.org/gsea/index.jsp>). For the comparison of interest (i.e., B<sub>DN</sub> Be1 and B<sub>DN</sub>  
860 Be2 cells), all detected genes were ranked by multiplying the  $-\log_{10}$  of the P-value from edgeR by the  
861 sign of the fold change and used as input for the GSEA Preranked analysis. The custom gene set  
862 defining genes upregulated in SLE T-bet<sup>hi</sup> B<sub>DN</sub> relative to other B cell subsets were derived from (19) and  
863 are listed in [Supplementary File 2](#).

864

865 **Ingenuity Pathway Analysis (IPA).** IPA upstream regulator analysis ((85), Qiagen, Redwood City CA)  
866 was performed using the  $\log_2$  fold-change in gene expression between genes that were significantly



867 differentially expressed (FDR < 0.05) in B<sub>DN</sub> Be1 and B<sub>DN</sub> Be2 cells. Upstream regulators with an  
868 activation z-score of  $\geq 2$  or  $\leq -2$  were considered to be activated or inhibited in B<sub>DN</sub> Be1 cells. Overlap *P*-  
869 value (between the regulator's downstream target list and the DEG list was based on Fisher's exact test.  
870

871 **Statistical Analysis.** Comparisons between two groups were performed with the Student's *t* test for  
872 normally distributed variables and the Mann-Whitney test for non-normally distributed variables. The one-  
873 way ANOVA test was used to compare mean values of three or more groups and the Kruskal-Wallis  
874 nonparametric test was used to compare medians. Strength and direction of association between two  
875 variables measures was performed using the D'Agostino-Pearson normality test followed by Pearson's  
876 or Spearman's correlation test. Data were considered significant when  $P \leq 0.05$ . Analysis of the data  
877 was done using the GraphPad Prism version 7.0a software (GraphPad). See [Supplementary File 6](#) for  
878 all statistical comparisons.

879  
880 **Mice and bone marrow chimeras.** All experimental animals were bred and maintained in the UAB  
881 animal facilities. All procedures involving animals were approved by the UAB Institutional Animal Care  
882 and Use Committee and were conducted in accordance with the principles outlined by the National  
883 Research Council. B6.SB-Yaa/J.B6;129S-Fcgr2b<sup>tm1Tk</sup>/J (Yaa.Fcgr2b<sup>-/-</sup>) (75) (obtained by permission  
884 from Dr. Sylvia Bolland (NIH)) were intercrossed with B6.129S2-Ighm<sup>tm1Cgn</sup>/J ( $\mu$ MT) or B6.129S6-  
885 Tbx21<sup>tm1Glm</sup>/J (Tbx21<sup>-/-</sup>) mice (both strains obtained from Jackson Laboratory) to produce B cell deficient  
886 (Yaa.Fcgr2b<sup>-/-</sup>. $\mu$ MT) or T-bet deficient (Yaa.Fcgr2b<sup>-/-</sup>.Tbx21<sup>-/-</sup>) lupus-prone mice. To generate bone  
887 marrow chimeras,  $\mu$ MT recipient mice were irradiated with 950 Rads from a high-energy X-ray source,  
888 delivered in a split dose 4 hrs apart. Recipients were reconstituted ( $10^7$  total BM cells) with 80%  
889 Yaa.Fcgr2b<sup>-/-</sup>. $\mu$ MT BM + 20% Yaa.Fcgr2b<sup>-/-</sup>.Tbx21<sup>-/-</sup> BM (B-YFT chimeras) or with 80% Yaa.Fcgr2b<sup>-/-</sup> BM  
890 + 20% Yaa.Fcgr2b<sup>-/-</sup>.Tbx21<sup>-/-</sup> BM (20%Control chimeras).

891  
892 **Mouse ANA detection and imaging.** Antinuclear antibodies (ANA) were detected by an indirect  
893 immunofluorescence assay using HEp-2 cells. Fixed HEp-2-coated microscope slides (Kallestad®,  
894 BioRad) were blocked, incubated with serum diluted 1:100 and stained with anti-IgG-FITC (Southern  
895 Biotech) (10  $\mu$ g/ml). Slides were mounted with SlowFade® Gold Antifade Mountant with DAPI  
896 (ThermoFisher) and imaged. Anti-nuclear staining was quantitated as the mean fluorescence intensity  
897 (MFI) of IgG-FITC over DAPI-staining areas (nuclei) using NIS-Elements AR software (Nikon). Data are  
898 presented as log nuclear IgG MFI normalized by subtracting the MFI of negative control serum from B6  
899 mice. ANA images were collected using a Nikon Eclipse Ti inverted microscope and recorded with a  
900 Clara interline CCD camera (Andor). The images were taken with a 20X (immunofluorescence) objective  
901 for 200-400X final magnification. Images were collected using NIS Elements software, scale bars were  
902 added and images were saved as high-resolution JPEGs. JPEG images were imported into Canvas Ver

903 12 software and were resized, cropped with the identical settings applied to all immunofluorescence  
904 images from the same experiment. Final images presented at 600-650 dpi (ANA).

905

906 **Urinary Albumin to Creatinine Ratio (UACR).** Albumin concentrations in urine samples, collected from  
907 live or euthanized mice, were measured using the Mouse Albumin ELISA Quantitation Set (Bethyl Labs)  
908 according to manufacturer's protocol using a mouse reference serum as an albumin standard. To  
909 normalize for urine concentration, urinary creatinine was measured by liquid chromatography-mass  
910 spectrometry in the UAB/UCSD O'Brien Core Center for Acute Kidney Injury Research. The UACR was  
911 calculated as  $\mu\text{g/ml}$  albumin divided by  $\text{mg/ml}$  creatinine and is reported as  $\mu\text{g}$  albumin/ $\text{mg}$  creatinine.

912

913

914 **Acknowledgements.**

915 We thank Thomas Scott Simpler, Uma Mudunuru, Holly Bachus, Fen Zhou, Betty Mousseau, Enid Keyser  
916 and Dr. Ji Young Hwang for technical support; Drs. Ann Marshak-Rothstein (Univ. Massachusetts),  
917 Randall Davis (UAB) and Paul Rennert for providing mice, antibodies and cell lines and Stephanie  
918 Ledbetter, Neva Gardner, Ellen Sowell and Catrena Johnson for assistance with recruitment and  
919 consenting of healthy and vaccinated subjects. We acknowledge the Tissue Procurement Facility of the  
920 NCI-supported UAB Comprehensive Cancer Center for providing remnant tonsil tissue; the Alabama  
921 Vaccine Research Clinic, the UAB RADAR biorepository and the UAB CCTS (UL1 TR001417) for  
922 assistance in procuring human samples; the UAB Animal Resources Program Comparative Pathology  
923 Laboratory for preparation of histology slides and the UAB/UCSD O'Brien Core Center for Acute Kidney  
924 Injury Research (NIH 1P30 DK 079337) for assistance with murine urine creatinine measurements.  
925 Funding for the work was provided by the US National Institutes of Health (NIH): P01 AI078907 and R01  
926 AI110508 (to FEL), R01 AI123733 (to JMB and CDS), U19 AI109962 (to F.E.L. and T.D.R.), P01 AI  
927 125180 (to I.S., F.E.L., JMB and CDS) and R37AI049660-11 and U19 Autoimmunity Centers of  
928 Excellence AI110483 (to I.S.). S.L.S. was partially supported by the UAB Medical Scientist Training  
929 Program NIGMS T32GM008361; A.N. received pilot grant support from the UAB AMC21 Immunology  
930 Autoimmunity and Transplantation strategic initiative and M.I.D. received support from NIAMS K23  
931 AR062100. The UAB CCTS informatics core (T.P.) receives support from the National Center for  
932 Advancing Translational Sciences of the National Institutes of Health under award  
933 number UL1TR001417. NIH P30 AR048311 and P30 AI027767 provided support for the UAB  
934 consolidated flow cytometry core, G20RR022807-01 provided support for the UAB Animal Resources  
935 Program X-irradiator and 5UM1CA183728 provided funding for acquisition of human tonsil tissue.

936

937 **References**

938

- 939 1. Tsokos GC, Lo MS, Costa Reis P, Sullivan KE. New insights into the immunopathogenesis of  
940 systemic lupus erythematosus. *Nat Rev Rheumatol*.2016;12:716-730.
- 941
- 942 2. Gatto M, Iaccarino L, Ghirardello A, Punzi L, Doria A. Clinical and pathologic considerations of  
943 the qualitative and quantitative aspects of lupus nephritogenic autoantibodies: A comprehensive review.  
944 *J Autoimmun*.2016;69:1-11.
- 945
- 946 3. Avalos AM, Busconi L, Marshak-Rothstein A. Regulation of autoreactive B cell responses to  
947 endogenous TLR ligands. *Autoimmunity*.2010;43:76-83.
- 948
- 949 4. Sanz I. Rationale for B cell targeting in SLE. *Semin Immunopathol*.2014;36:365-375.
- 950
- 951 5. Apostolidis SA, Lieberman LA, Kis-Toth K, Crispin JC, Tsokos GC. The dysregulation of cytokine  
952 networks in systemic lupus erythematosus. *J Interferon Cytokine Res*.2011;31:769-779.
- 953
- 954 6. Obermoser G, Pascual V. The interferon-alpha signature of systemic lupus erythematosus.  
955 *Lupus*.2010;19:1012-1019.
- 956
- 957 7. Csiszar A, Nagy G, Gergely P, Pozsonyi T, Pocsik E. Increased interferon-gamma (IFN-gamma),  
958 IL-10 and decreased IL-4 mRNA expression in peripheral blood mononuclear cells (PBMC) from patients  
959 with systemic lupus erythematosus (SLE). *Clin Exp Immunol*.2000;122:464-470.
- 960
- 961 8. Harigai M, Kawamoto M, Hara M, et al. Excessive production of IFN-gamma in patients with  
962 systemic lupus erythematosus and its contribution to induction of B lymphocyte stimulator/B cell-  
963 activating factor/TNF ligand superfamily-13B. *Journal of immunology (Baltimore, Md :  
964 1950)*.2008;181:2211-2219.
- 965
- 966 9. Pollard KM, Cauvi DM, Toomey CB, Morris KV, Kono DH. Interferon-gamma and systemic  
967 autoimmunity. *Discov Med*.2013;16:123-131.
- 968
- 969 10. Chiche L, Jourde-Chiche N, Whalen E, et al. Modular transcriptional repertoire analyses of adults  
970 with systemic lupus erythematosus reveal distinct type I and type II interferon signatures. *Arthritis  
971 Rheumatol*.2014;66:1583-1595.
- 972
- 973 11. Welcher AA, Boedigheimer M, Kivitz AJ, et al. Blockade of interferon-gamma normalizes  
974 interferon-regulated gene expression and serum CXCL10 levels in patients with systemic lupus  
975 erythematosus. *Arthritis Rheumatol*.2015;67:2713-2722.
- 976
- 977 12. Munroe ME, Lu R, Zhao YD, et al. Altered type II interferon precedes autoantibody accrual and  
978 elevated type I interferon activity prior to systemic lupus erythematosus classification. *Ann Rheum  
979 Dis*.2016;75:2014-2021.
- 980
- 981 13. Lu R, Munroe ME, Guthridge JM, et al. Dysregulation of innate and adaptive serum mediators  
982 precedes systemic lupus erythematosus classification and improves prognostic accuracy of  
983 autoantibodies. *J Autoimmun*.2016;74:182-193.
- 984
- 985 14. Miller SA, Weinmann AS. Molecular mechanisms by which T-bet regulates T-helper cell  
986 commitment. *Immunol Rev*.2010;238:233-246.

- 987  
988 15. Nicholas MW, Dooley MA, Hogan SL, et al. A novel subset of memory B cells is enriched in  
989 autoreactivity and correlates with adverse outcomes in SLE. *Clinical immunology (Orlando, Fla)*.2008;126:189-201.  
990  
991  
992 16. Lit LC, Wong CK, Li EK, et al. Elevated gene expression of Th1/Th2 associated transcription  
993 factors is correlated with disease activity in patients with systemic lupus erythematosus. *J*  
994 *Rheumatol*.2007;34:89-96.  
995  
996 17. Wu O, Chen GP, Chen H, et al. The expressions of Toll-like receptor 9 and T-bet in circulating B  
997 and T cells in newly diagnosed, untreated systemic lupus erythematosus and correlations with disease  
998 activity and laboratory data in a Chinese population. *Immunobiology*.2009;214:392-402.  
999  
1000 18. Wang S, Wang J, Kumar V, et al. IL-21 drives expansion and plasma cell differentiation of  
1001 autoreactive CD11c(hi)T-bet(+) B cells in SLE. *Nature communications*.2018;9:1758.  
1002  
1003 19. Jenks SA, Cashman KS, Zumaquero E, et al. Distinct Effector B Cells Induced by Unregulated  
1004 Toll-like Receptor 7 Contribute to Pathogenic Responses in Systemic Lupus Erythematosus.  
1005 *Immunity*.2018;49:725-739 e726.  
1006  
1007 20. Domeier PP, Chodisetti SB, Soni C, et al. IFN-gamma receptor and STAT1 signaling in B cells  
1008 are central to spontaneous germinal center formation and autoimmunity. *The Journal of experimental*  
1009 *medicine*.2016;213:715-732.  
1010  
1011 21. Jackson SW, Jacobs HM, Arkatkar T, et al. B cell IFN-gamma receptor signaling promotes  
1012 autoimmune germinal centers via cell-intrinsic induction of BCL-6. *The Journal of experimental*  
1013 *medicine*.2016;213:733-750.  
1014  
1015 22. Thibault DL, Chu AD, Graham KL, et al. IRF9 and STAT1 are required for IgG autoantibody  
1016 production and B cell expression of TLR7 in mice. *The Journal of clinical investigation*.2008;118:1417-  
1017 1426.  
1018  
1019 23. Rubtsova K, Rubtsov AV, Thurman JM, et al. B cells expressing the transcription factor T-bet  
1020 drive lupus-like autoimmunity. *The Journal of clinical investigation*.2017;127:1392-1404.  
1021  
1022 24. Liu Y, Zhou S, Qian J, et al. T-bet(+)CD11c(+) B cells are critical for antichromatin immunoglobulin  
1023 G production in the development of lupus. *Arthritis research & therapy*.2017;19:225.  
1024  
1025 25. Du SW, Arkatkar T, Jacobs HM, Rawlings DJ, Jackson SW. Generation of functional murine  
1026 CD11c(+) age-associated B cells in the absence of B cell T-bet expression. *Eur J Immunol*.2019;49:170-  
1027 178.  
1028  
1029 26. Karnell JL, Kumar V, Wang J, et al. Role of CD11c(+) T-bet(+) B cells in human health and  
1030 disease. *Cellular immunology*.2017;321:40-45.  
1031  
1032 27. Rubtsov AV, Marrack P, Rubtsova K. T-bet expressing B cells - Novel target for autoimmune  
1033 therapies? *Cellular immunology*.2017;321:35-39.  
1034  
1035 28. Wei C, Anolik J, Cappione A, et al. A new population of cells lacking expression of CD27  
1036 represents a notable component of the B cell memory compartment in systemic lupus erythematosus.  
1037 *Journal of immunology (Baltimore, Md : 1950)*.2007;178:6624-6633.

- 1038  
1039 29. Portugal S, Obeng-Adjei N, Moir S, Crompton PD, Pierce SK. Atypical memory B cells in human  
1040 chronic infectious diseases: An interim report. *Cellular immunology*.2017;321:18-25.  
1041  
1042 30. Ehrhardt GR, Hsu JT, Gartland L, et al. Expression of the immunoregulatory molecule FcRH4  
1043 defines a distinctive tissue-based population of memory B cells. *The Journal of experimental*  
1044 *medicine*.2005;202:783-791.  
1045  
1046 31. Moir S, Ho J, Malaspina A, et al. Evidence for HIV-associated B cell exhaustion in a dysfunctional  
1047 memory B cell compartment in HIV-infected viremic individuals. *The Journal of experimental*  
1048 *medicine*.2008;205:1797-1805.  
1049  
1050 32. Weiss GE, Crompton PD, Li S, et al. Atypical memory B cells are greatly expanded in individuals  
1051 living in a malaria-endemic area. *Journal of immunology (Baltimore, Md : 1950)*.2009;183:2176-2182.  
1052  
1053 33. Knox JJ, Buggert M, Kardava L, et al. T-bet+ B cells are induced by human viral infections and  
1054 dominate the HIV gp140 response. *JCI insight*.2017;2.  
1055  
1056 34. Colonna-Romano G, Bulati M, Aquino A, et al. A double-negative (IgD-CD27-) B cell population  
1057 is increased in the peripheral blood of elderly people. *Mech Ageing Dev*.2009;130:681-690.  
1058  
1059 35. Frasca D, Diaz A, Romero M, Blomberg BB. Human peripheral late/exhausted memory B cells  
1060 express a senescent-associated secretory phenotype and preferentially utilize metabolic signaling  
1061 pathways. *Experimental gerontology*.2017;87:113-120.  
1062  
1063 36. Naradikian MS, Hao Y, Cancro MP. Age-associated B cells: key mediators of both protective and  
1064 autoreactive humoral responses. *Immunol Rev*.2016;269:118-129.  
1065  
1066 37. Illingworth J, Butler NS, Roetynck S, et al. Chronic exposure to *Plasmodium falciparum* is  
1067 associated with phenotypic evidence of B and T cell exhaustion. *Journal of immunology (Baltimore, Md :*  
1068 *1950)*.2013;190:1038-1047.  
1069  
1070 38. Portugal S, Tipton CM, Sohn H, et al. Malaria-associated atypical memory B cells exhibit markedly  
1071 reduced B cell receptor signaling and effector function. *eLife*.2015;4.  
1072  
1073 39. Sullivan RT, Kim CC, Fontana MF, et al. FCRL5 Delineates Functionally Impaired Memory B Cells  
1074 Associated with *Plasmodium falciparum* Exposure. *PLoS pathogens*.2015;11:e1004894.  
1075  
1076 40. Lau D, Lan LY, Andrews SF, et al. Low CD21 expression defines a population of recent germinal  
1077 center graduates primed for plasma cell differentiation. *Sci Immunol*.2017;2.  
1078  
1079 41. Nutt SL, Hodgkin PD, Tarlinton DM, Corcoran LM. The generation of antibody-secreting plasma  
1080 cells. *Nat Rev Immunol*.2015;15:160-171.  
1081  
1082 42. Harris DP, Goodrich S, Gerth AJ, Peng SL, Lund FE. Regulation of IFN-gamma production by B  
1083 effector 1 cells: essential roles for T-bet and the IFN-gamma receptor. *Journal of immunology (Baltimore,*  
1084 *Md : 1950)*.2005;174:6781-6790.  
1085  
1086 43. Stone SL, Peel J, Scharer CD, et al. T-bet promotes antibody secreting cell differentiation by  
1087 preventing establishment of an IFN $\gamma$  inflammatory feedforward loop in B cells. *Immunity*.2019;in press.  
1088

- 1089 44. Zhu J, Yamane H, Paul WE. Differentiation of effector CD4 T cell populations. *Annu Rev*  
1090 *Immunol.*2010;28:445-489.
- 1091
- 1092 45. Ettinger R, Kuchen S, Lipsky PE. The role of IL-21 in regulating B-cell function in health and  
1093 disease. *Immunol Rev.*2008;223:60-86.
- 1094
- 1095 46. Tangye SG. Advances in IL-21 biology - enhancing our understanding of human disease. *Curr*  
1096 *Opin Immunol.*2015;34:107-115.
- 1097
- 1098 47. Rochman Y, Spolski R, Leonard WJ. New insights into the regulation of T cells by gamma(c)  
1099 family cytokines. *Nat Rev Immunol.*2009;9:480-490.
- 1100
- 1101 48. Russell Knode LM, Naradikian MS, Myles A, et al. Age-Associated B Cells Express a Diverse  
1102 Repertoire of VH and Vkappa Genes with Somatic Hypermutation. *Journal of immunology (Baltimore,*  
1103 *Md : 1950).*2017;198:1921-1927.
- 1104
- 1105 49. Abbas AR, Baldwin D, Ma Y, et al. Immune response in silico (IRIS): immune-specific genes  
1106 identified from a compendium of microarray expression data. *Genes Immun.*2005;6:319-331.
- 1107
- 1108 50. Tarte K, Zhan F, De Vos J, Klein B, Shaughnessy J, Jr. Gene expression profiling of plasma cells  
1109 and plasmablasts: toward a better understanding of the late stages of B-cell differentiation.  
1110 *Blood.*2003;102:592-600.
- 1111
- 1112 51. Shaffer AL, Emre NC, Lamy L, et al. IRF4 addiction in multiple myeloma. *Nature.*2008;454:226-  
1113 231.
- 1114
- 1115 52. Sindhava VJ, Oropallo MA, Moody K, et al. A TLR9-dependent checkpoint governs B cell  
1116 responses to DNA-containing antigens. *The Journal of clinical investigation.*2017;127:1651-1663.
- 1117
- 1118 53. Naradikian MS, Myles A, Beiting DP, et al. Cutting Edge: IL-4, IL-21, and IFN-gamma Interact To  
1119 Govern T-bet and CD11c Expression in TLR-Activated B Cells. *Journal of immunology (Baltimore, Md :*  
1120 *1950).*2016.
- 1121
- 1122 54. Mackay F, Schneider P, Rennert P, Browning J. BAFF AND APRIL: a tutorial on B cell survival.  
1123 *Annu Rev Immunol.*2003;21:231-264.
- 1124
- 1125 55. Heinz S, Benner C, Spann N, et al. Simple combinations of lineage-determining transcription  
1126 factors prime cis-regulatory elements required for macrophage and B cell identities. *Mol*  
1127 *Cell.*2010;38:576-589.
- 1128
- 1129 56. Consortium EP. An integrated encyclopedia of DNA elements in the human genome.  
1130 *Nature.*2012;489:57-74.
- 1131
- 1132 57. Lee SK, Silva DG, Martin JL, et al. Interferon-gamma excess leads to pathogenic accumulation  
1133 of follicular helper T cells and germinal centers. *Immunity.*2012;37:880-892.
- 1134
- 1135 58. Nakagawa T, Hirano T, Nakagawa N, Yoshizaki K, Kishimoto T. Effect of recombinant IL 2 and  
1136 gamma-IFN on proliferation and differentiation of human B cells. *Journal of immunology (Baltimore, Md*  
1137 *: 1950).*1985;134:959-966.
- 1138

- 1139 59. Splawski JB, Jelinek DF, Lipsky PE. Immunomodulatory role of IL-4 on the secretion of Ig by  
1140 human B cells. *Journal of immunology* (Baltimore, Md : 1950).1989;142:1569-1575.  
1141
- 1142 60. Rousset F, Garcia E, Banchereau J. Cytokine-induced proliferation and immunoglobulin  
1143 production of human B lymphocytes triggered through their CD40 antigen. *The Journal of experimental*  
1144 *medicine*.1991;173:705-710.  
1145
- 1146 61. Chaggier A, Kong XF, Boisson-Dupuis S, et al. A partial form of recessive STAT1 deficiency in  
1147 humans. *The Journal of clinical investigation*.2009;119:1502-1514.  
1148
- 1149 62. Chaggier A, Wynn RF, Jouanguy E, et al. Human complete Stat-1 deficiency is associated with  
1150 defective type I and II IFN responses in vitro but immunity to some low virulence viruses in vivo. *Journal*  
1151 *of immunology* (Baltimore, Md : 1950).2006;176:5078-5083.  
1152
- 1153 63. Berglund LJ, Avery DT, Ma CS, et al. IL-21 signalling via STAT3 primes human naive B cells to  
1154 respond to IL-2 to enhance their differentiation into plasmablasts. *Blood*.2013;122:3940-3950.  
1155
- 1156 64. Bernabei P, Coccia EM, Rigamonti L, et al. Interferon-gamma receptor 2 expression as the  
1157 deciding factor in human T, B, and myeloid cell proliferation or death. *J Leukoc Biol*.2001;70:950-960.  
1158
- 1159 65. Sammicheli S, Dang VP, Ruffin N, et al. IL-7 promotes CD95-induced apoptosis in B cells via the  
1160 IFN-gamma/STAT1 pathway. *PloS one*.2011;6:e28629.  
1161
- 1162 66. Tangye SG, Avery DT, Hodgkin PD. A division-linked mechanism for the rapid generation of Ig-  
1163 secreting cells from human memory B cells. *Journal of immunology* (Baltimore, Md : 1950).2003;170:261-  
1164 269.  
1165
- 1166 67. Jego G, Palucka AK, Blanck JP, et al. Plasmacytoid dendritic cells induce plasma cell  
1167 differentiation through type I interferon and interleukin 6. *Immunity*.2003;19:225-234.  
1168
- 1169 68. Bekeredjian-Ding IB, Wagner M, Hornung V, et al. Plasmacytoid dendritic cells control TLR7  
1170 sensitivity of naive B cells via type I IFN. *Journal of immunology* (Baltimore, Md : 1950).2005;174:4043-  
1171 4050.  
1172
- 1173 69. Iwata S, Mikami Y, Sun HW, et al. The Transcription Factor T-bet Limits Amplification of Type I  
1174 IFN Transcriptome and Circuitry in T Helper 1 Cells. *Immunity*.2017;46:983-991 e984.  
1175
- 1176 70. Xin A, Masson F, Liao Y, et al. A molecular threshold for effector CD8(+) T cell differentiation  
1177 controlled by transcription factors Blimp-1 and T-bet. *Nat Immunol*.2016;17:422-432.  
1178
- 1179 71. Deenick EK, Avery DT, Chan A, et al. Naive and memory human B cells have distinct  
1180 requirements for STAT3 activation to differentiate into antibody-secreting plasma cells. *The Journal of*  
1181 *experimental medicine*.2013;210:2739-2753.  
1182
- 1183 72. Sweet RA, Ols ML, Cullen JL, et al. Facultative role for T cells in extrafollicular Toll-like receptor-  
1184 dependent autoreactive B-cell responses in vivo. *Proc Natl Acad Sci U S A*.2011;108:7932-7937.  
1185
- 1186 73. Rao DA, Gurish MF, Marshall JL, et al. Pathologically expanded peripheral T helper cell subset  
1187 drives B cells in rheumatoid arthritis. *Nature*.2017;542:110-114.  
1188



- 1189 74. Lee YH, Choi SJ, Ji JD, Song GG. Association between toll-like receptor polymorphisms and  
1190 systemic lupus erythematosus: a meta-analysis update. *Lupus*.2016;25:593-601.  
1191
- 1192 75. Pisitkun P, Deane JA, Difilippantonio MJ, et al. Autoreactive B cell responses to RNA-related  
1193 antigens due to TLR7 gene duplication. *Science*.2006;312:1669-1672.  
1194
- 1195 76. Christensen SR, Shupe J, Nickerson K, et al. Toll-like receptor 7 and TLR9 dictate autoantibody  
1196 specificity and have opposing inflammatory and regulatory roles in a murine model of lupus.  
1197 *Immunity*.2006;25:417-428.  
1198
- 1199 77. Boedigheimer MJ, Martin DA, Amoura Z, et al. Safety, pharmacokinetics and pharmacodynamics  
1200 of AMG 811, an anti-interferon-gamma monoclonal antibody, in SLE subjects without or with lupus  
1201 nephritis. *Lupus Sci Med*.2017;4:e000226.  
1202
- 1203 78. <https://github.com/cdschar>.  
1204
- 1205 79. Corces MR, Trevino AE, Hamilton EG, et al. An improved ATAC-seq protocol reduces background  
1206 and enables interrogation of frozen tissues. *Nat Methods*.2017;14:959-962.  
1207
- 1208 80. Scharer CD, Blalock EL, Barwick BG, et al. ATAC-seq on biobanked specimens defines a unique  
1209 chromatin accessibility structure in naive SLE B cells. *Sci Rep*.2016;6:27030.  
1210
- 1211 81. Langmead B, Trapnell C, Pop M, Salzberg SL. Ultrafast and memory-efficient alignment of short  
1212 DNA sequences to the human genome. *Genome Biol*.2009;10:R25.  
1213
- 1214 82. Zhang Y, Liu T, Meyer CA, et al. Model-based analysis of ChIP-Seq (MACS). *Genome*  
1215 *Biol*.2008;9:R137.  
1216
- 1217 83. Robinson MD, McCarthy DJ, Smyth GK. edgeR: a Bioconductor package for differential  
1218 expression analysis of digital gene expression data. *Bioinformatics*.2010;26:139-140.  
1219
- 1220 84. Lawrence M, Huber W, Pages H, et al. Software for computing and annotating genomic ranges.  
1221 *PLoS Comput Biol*.2013;9:e1003118.  
1222
- 1223 85. Kramer A, Green J, Pollard J, Jr., Tugendreich S. Causal analysis approaches in Ingenuity  
1224 Pathway Analysis. *Bioinformatics*.2014;30:523-530.  
1225  
1226  
1227

1228 **Figure Legends**

1229  
1230 **Figure 1. Expansion of the T-bet<sup>hi</sup> DN2 subset in SLE patients correlates with systemic**  
1231 **inflammatory cytokine levels. (a-c)** Analysis of T-bet<sup>hi</sup> B cells in peripheral blood B cell subsets from  
1232 healthy donor (HD) and SLE patients. Gating strategy to identify ASCs, B cells (non-ASCs) (**a, left**) and  
1233 B cell subsets (**a, right**), including naïve IgD<sup>+</sup>CD27<sup>neg</sup> (B<sub>N</sub>), switched memory IgD<sup>neg</sup>CD27<sup>+</sup> (B<sub>SW</sub>)  
1234 unswitched memory IgD<sup>+</sup>CD27<sup>+</sup> (B<sub>U</sub>) and double negative IgD<sup>neg</sup>CD27<sup>neg</sup> (B<sub>DN</sub>) cells, from the peripheral  
1235 blood of HD and SLE patients. Frequency of T-bet<sup>hi</sup> B cells (**b**) within the total B cell (B<sub>T</sub>) compartment  
1236 and each B cell subset with representative flow plot showing T-bet expression in total SLE B cells.  
1237 Correlation analysis (**c**) comparing frequencies of B<sub>DN</sub> cells to T-bet<sup>hi</sup> B cells in each patient. n= 20 HD  
1238 (**b**) and 40 SLE patients (**b-c**).

1239 (**d-e**) T-bet expression by SLE patient B<sub>DN</sub> cells. Subdivision of the SLE B<sub>DN</sub> population (**d**) into  
1240 CXCR5<sup>+</sup>CD11c<sup>lo</sup> DN1 and T-bet<sup>hi</sup> CXCR5<sup>neg</sup>CD11c<sup>hi</sup> DN2 populations with T-bet expression levels (**e**) in  
1241 each subset shown as a histogram. Data include representative flow plots from a single patient (**d-e**) and  
1242 the frequency of DN2 cells (**e**) within the B<sub>DN</sub> subset of 16 SLE patients.

1243 (**f**) Phenotypic characterization of T-bet<sup>hi</sup> B cells in SLE patients. Expression of CD19, CD11c, FcRL5,  
1244 CD23 and CXCR5 by T-bet<sup>hi</sup> B cells from a representative SLE patient.

1245 (**g-i**) *Ex vivo* isolated SLE T-bet<sup>hi</sup> B<sub>DN</sub> cells resemble pre-ASCs. SLE patient B cells (n=3 independent  
1246 donors) were subdivided as shown in (**g**) into CD27<sup>hi</sup>CD38<sup>hi</sup> ASCs, T-bet<sup>hi</sup> B<sub>DN</sub> cells and T-bet<sup>lo</sup> B cells  
1247 and analyzed by flow cytometry for expression of BLIMP1 (**h**) and IRF4 (**i**). Representative flow plots and  
1248 mean fluorescence intensity (MFI) expression of BLIMP1 and IRF4 in each population are shown.

1249 (**j**) Correlation analysis between frequency of circulating T-bet<sup>hi</sup> B<sub>DN</sub> cells and anti-Smith autoAb titers in  
1250 SLE patients. n= 18 SLE patients.

1251 (**k-l**) Correlation (**k**) between plasma cytokine levels and frequency of T-bet<sup>hi</sup> B<sub>DN</sub> cells in SLE patient  
1252 peripheral blood. Plasma concentration of IFN<sub>γ</sub>, CXCL10 and TNF<sub>α</sub> (**l**) in HD (blue symbols) and SLE  
1253 patients (red symbols). SLE samples were subdivided into patients with <0.5% (circles) or >0.5%  
1254 (triangles) T-bet<sup>hi</sup> B<sub>DN</sub> cells within the total B cells. n= 5 HD and 16 SLE patients.

1255 Individual human subjects in each analysis are represented by a symbol. Horizontal black lines represent  
1256 the mean (**d** and **l** (CXCL10, TNF<sub>α</sub>) or median (**b**, **l** (IFN<sub>γ</sub>)) within the group. Statistical analyses were  
1257 performed using a Student's t test (**l** (CXCL10 and TNF<sub>α</sub>)), non-parametric Mann-Whitney test (**b** and **l**  
1258 (IFN<sub>γ</sub>)), a one way paired T test (**h-i**), Spearman Correlation test (**j-k**) or Pearson Correlation test (**c**).  
1259 Correlation *P* and *r* values listed in the figure. *P* values \* ≤0.05, \*\*<0.01, \*\*\*<0.001.

1260  
1261 **Figure 2. Th1 cells promote the formation of T-bet<sup>hi</sup> IgD<sup>neg</sup>CD27<sup>neg</sup> B<sub>DN</sub> cells from B<sub>N</sub> precursors.**  
1262 (**a-e**) Description of B/T co-cultures. Cartoon (**a**) describing setup of Be1 (B<sub>N</sub> + Th1 cells) and Be2 (B<sub>N</sub> +  
1263 Th2 cells) co-cultures. Paired Be1 and Be2 co-cultures contain Th1 or Th2 effectors generated from the

1264 same HD, B<sub>N</sub> cells from a second allogeneic HD and exogenous IL-21 and IL-2. Purification strategy (**b**)  
1265 for B<sub>N</sub> cells (red gate) from tonsil and blood and characterization of *in vitro* polarized Th1 and Th2 cells  
1266 (**c-e**). T-bet and GATA-3 expression (**c**) in Th1 (solid line) and Th2 (dotted line) cells restimulated for 6  
1267 hr with plate-bound anti-CD3 and anti-CD28. Cytokine levels (**d**) in supernatants from restimulated (ST)  
1268 or non-restimulated (nil) Th1 (black circles) and Th2 cells (open circles) from 5 independent experiments  
1269 with the gray bars representing the mean of all experiments. Dotted line indicates maximal measurable  
1270 levels of the cytokine in the assay. IL-21 production (**e**) by restimulated Th1 and Th2 cells.  
1271 (**f-g**) Development of T-bet<sup>hi</sup> B<sub>DN</sub> cells in B<sub>N</sub>/Th1 co-cultures. Flow cytometric analysis showing T-bet  
1272 expression (**f**) on gated HD B cells from day 6 Be1 and Be2 co-cultures. Phenotyping (**g**) of day 6 B cell-  
1273 gated Be1 cells showing T-bet expression in combination with other surface markers. Statistical analyses  
1274 (**d**) were performed using One-way ANOVA comparing the mean of the non-restimulated to restimulated  
1275 cells. *P* values \* $<0.05$ , \*\* $<0.01$ , \*\*\* $<0.001$ , \*\*\*\* $<0.0001$ .

1276

1277 **Figure 3. ASC development from B<sub>N</sub> precursors is enhanced in Th1 containing co-cultures.**

1278 (**a-d**) ASC development in HD Be1 and Be2 co-cultures showing representative flow plots (**a**) and  
1279 frequencies (**b**) of CD38<sup>hi</sup>CD27<sup>hi</sup> ASCs in CD19<sup>+/lo</sup>-gated B lineage cells from day 6 paired Be1 and Be2  
1280 co-cultures. Frequencies of IgM<sup>+</sup> (**c**) or IgG<sup>+</sup> (**d**) ASCs in each day 6 paired co-culture. Gating strategy to  
1281 identify IgG<sup>+</sup> and IgM<sup>+</sup> ASCs shown in [Figure 3-figure supplement 1](#).

1282 (**e-j**) Proliferation analysis of B cells in paired day 6 HD Be1 and Be2 co-cultures. Co-cultures generated  
1283 with purified CTV-labeled HD B<sub>N</sub> cells and allogeneic Th1 or Th2 cells + IL-21 and IL-2. B lineage cells  
1284 gated as CD19<sup>+/lo</sup> (includes both ASCs and non-ASC B cells). ASCs identified as CD27<sup>hi</sup>CD38<sup>hi</sup> (**f**) or  
1285 CD38<sup>hi</sup>IRF4<sup>hi</sup> (**i**). Data reported as the proportion of total CD19<sup>+/lo</sup> B lineage cells (**e, h**) in each cell division  
1286 or the fraction of cells within each cell division that are ASCs (**g, j**). Data from 3 additional independent  
1287 B<sub>N</sub>/Th1 co-cultures can be found in [Figure 3-figure supplement 1](#).

1288 Analyses in **b-d** performed on 15 (**b**), 8 (**c**) or 6 (**d**) independent paired Be1 and Be2 co-cultures. Analysis  
1289 in **e-j** are from two independent paired co-cultures and are representative of >5 independent experiments  
1290 (See [Figure 3-figure supplement 1](#)).

1291 Statistical analyses were performed using a non-parametric Wilcoxon paired t test (**b**) or paired Student's  
1292 t test (**c-d**). *P* values \* $<0.05$ , \*\* $<0.01$ , \*\*\*\* $<0.0001$ .

1293

1294 **Figure 4. Th1-induced T-bet<sup>hi</sup> B<sub>DN</sub> cells are pre-ASCs.** (**a-j**) Transcriptome analysis of *in vitro* generated  
1295 IgD<sup>neg</sup>CD27<sup>neg</sup> T-bet<sup>hi</sup> B<sub>DN</sub> cells. RNA-seq analysis performed on IgD<sup>neg</sup>CD27<sup>neg</sup> B<sub>DN</sub> cells (gating in panel  
1296 **a**) that were sort-purified from day 6 HD Be1 and Be2 co-cultures. (n=3 samples/subset derived from 3  
1297 independent paired co-culture experiments). Heat map (**b**), showing 427 differentially expressed genes  
1298 (DEGs) based on FDR < 0.05. T-bet mRNA expression levels (**c**) in IgD<sup>neg</sup>CD27<sup>neg</sup> B<sub>DN</sub> cells from day 6  
1299 Be1 and Be2 co-cultures. Gene Set Enrichment Analysis (GSEA, panels **d-j**) comparing transcriptome

1300 profile of *in vitro* generated B<sub>DN</sub> cells from Be1 and Be2 co-cultures with published DEGs identified in  
1301 different B cell subsets. Data are reported as Enrichment Score (ES) plotted against the ranked B<sub>DN</sub> Be1  
1302 and Be2 gene list (n = 11598). DEG lists used for GSEA include: DEGs that are upregulated in sort-  
1303 purified SLE patient-derived T-bet<sup>hi</sup> B<sub>DN</sub> cells (CD19<sup>hi</sup>IgD<sup>neg</sup>CD27<sup>neg</sup>CXCR5<sup>neg</sup>IgG<sup>+</sup>) compared to other  
1304 SLE patient-derived mature B cell subsets (**d**, (19)); DEGs that are upregulated in CD11c<sup>hi</sup> ABCs isolated  
1305 from aged mice (48) compared to follicular B cells isolated from young (**e**) or aged (**f**) mice; DEGs that  
1306 are upregulated in human plasma cells (ASCs) relative to: B<sub>N</sub> cells (**g**, (49)), total B cells (**h**, (50)) or B<sub>SW</sub>  
1307 cells (**i**, (49)); and IRF4 target genes (**j**, (51)) that are upregulated in ASCs relative to B cells. Nominal *P*  
1308 value for GSEA is shown.

1309 (**k-m**) IgD<sup>neg</sup>CD27<sup>neg</sup> T-bet<sup>hi</sup> B<sub>DN</sub> cells express intermediate levels of IRF4 and are actively proliferating.  
1310 Gating strategy (**k**) to identify CD27<sup>hi</sup>CD38<sup>hi</sup> ASCs, IgD<sup>+</sup>CD27<sup>neg</sup> B cells and IgD<sup>neg</sup>CD27<sup>neg</sup> B<sub>DN</sub> cells in  
1311 day 6 Be1 co-cultures generated from unlabeled (**k-l**) or CTV-labeled (**m**) HD B<sub>N</sub> cells. Expression of T-  
1312 bet and IRF4 (**l-m**) by ASCs (blue), IgD<sup>+</sup>CD27<sup>neg</sup> B cells (green) and IgD<sup>neg</sup>CD27<sup>neg</sup> B<sub>DN</sub> cells (red) from  
1313 day 6 Be1 co-cultures. Proliferation profile of T-bet<sup>lo</sup>IRF4<sup>neg</sup> (Pop-A), T-bet<sup>hi</sup>IRF4<sup>lo/int</sup> (Pop-B), T-  
1314 bet<sup>hi</sup>IRF4<sup>int/hi</sup> (Pop-C) and T-bet<sup>lo</sup>IRF4<sup>hi</sup> (Pop-D) subsets shown.

1315 (**n-o**) IgD<sup>neg</sup>CD27<sup>neg</sup> B<sub>DN</sub> Be1 cells rapidly differentiate into ASCs. IgD<sup>neg</sup>CD27<sup>neg</sup> B<sub>DN</sub> cells from day 6 HD  
1316 Be1 and Be2 cultures were sort-purified, CTV labeled and incubated overnight (18 hrs) in conditioned  
1317 medium. Enumeration of ASCs (CD19<sup>lo</sup>CD38<sup>hi</sup>CD27<sup>+</sup>) in the undivided cells (Division 0 (D0)) and the cells  
1318 that divided one time (Division 1 (D1)). Representative flow plots (**n**) showing the frequency of cells in D0  
1319 or D1 in each culture and the frequency of CD19<sup>lo</sup>CD38<sup>hi</sup>CD27<sup>+</sup> ASCs present in the D0 or D1 fraction.  
1320 Panel (**o**) reports frequency of ASCs within the cultures from 3 independent experiments.

1321 Statistical analysis performed with unpaired (**c**) or paired (**o**) Students t test. Nominal *P* values (**d-j**) for  
1322 GSEA are shown. *P* values \* $<0.05$ , \*\* $<0.01$ . See [Supplementary File 1](#) for complete B<sub>DN</sub> Be1 and Be2  
1323 RNA-seq data set and [Supplementary File 2](#) for SLE patient-derived T-bet<sup>hi</sup> B<sub>DN</sub> DEG list.

1324

1325 **Figure 5. Early but transient BCR signals promote ASC differentiation from T-bet<sup>hi</sup> B<sub>DN</sub> pre-ASCs.**

1326 (**a**) Ingenuity Pathway Analysis (IPA) based on 427 DEG with FDR  $< .05$  (allowing both direct and indirect  
1327 interactions) to identify predicted upstream regulators of the HD B<sub>DN</sub> Be1 transcriptome. The predicted  
1328 activation state (z-score of B<sub>DN</sub> Be1 over B<sub>DN</sub> Be2) of each regulator/signaling pathway is shown as bar  
1329 color (orange, activated; blue, inhibited) with predicted upstream regulators sorted in order of significance  
1330 (overlap *P* value). Regulators are shown that have an overlap *P*-value  $< 0.00001$ .

1331 (**b-g**) IPA-identified stimuli induce development of T-bet<sup>hi</sup>IRF4<sup>int</sup> B<sub>DN</sub> pre-ASC-like cells from HD and SLE  
1332 B<sub>N</sub> cells. Cartoon (**b**) depicting *in vitro* stimulation conditions to activate purified B<sub>N</sub> cells from HD (**c-d**, **f**)  
1333 and SLE patients (**e,g**) with cytokines (IL-2, Baff, IL-21, IFN $\gamma$ ), anti-Ig and R848 for 6 days. Phenotypic  
1334 characterization of day 6 activated cells showing IRF4 and T-bet expression (**c**) on HD IgD<sup>neg</sup>CD27<sup>neg</sup>  
1335 B<sub>DN</sub> cells. Phenotypic analysis of T-bet<sup>hi</sup> B<sub>DN</sub> cells in day 6 cultures containing B<sub>N</sub> cells from HD (**d**) or

1336 SLE (e) patients. Enumeration of ASCs in day 6 cultures containing B<sub>N</sub> cells from HD (f) or SLE (g)  
1337 patients.  
1338 (h-o) ASC generation from HD B<sub>DN</sub> cells requires early but transient BCR activation. CTV-labeled HD B<sub>N</sub>  
1339 cells were activated for 3 days with R848, cytokines (IFN<sub>γ</sub>, IL-2, IL-21, Baff) ± anti-Ig (Step 1) and then  
1340 washed and recultured for an additional 3 days with the same stimuli ± anti-Ig (Step 2) (h). Cells were  
1341 analyzed by flow cytometry on days 3 (i) and 6 (j-o). T-bet and IRF4 expression (i) on day 3 by R848  
1342 and cytokine cocktail activated B cells exposed (+) or not (-) to anti-Ig over the first 3 days. CTV dilution  
1343 and cell division (j-k), cell recovery (l), ASC frequencies (m-n) and ASC recovery (o) on day 6 in cultures  
1344 that were not exposed to anti-Ig during steps 1 and 2 (-,-); were exposed to anti-Ig throughout steps 1  
1345 and 2 (+,+); were exposed to anti-Ig only in step 1 (+,-); or were exposed to anti-Ig only in step 2 (-,+).  
1346 Representative flow panels showing CTV dilution (j) with quantitation showing % of cells in each cell  
1347 division (k) and cell recovery (l). Representative flow panels showing % ASCs (m) with quantitation  
1348 showing % ASCs (n) and ASC recovery (o).  
1349 (p-q) ASC generation from SLE B<sub>N</sub> cells requires early but transient BCR activation. CTV-labeled SLE T-  
1350 bet<sup>lo</sup> B<sub>N</sub> cells were sort-purified and cultured for 6 days as described in (h). Data are shown as the  
1351 frequency of CD27<sup>hi</sup>CD38<sup>hi</sup> ASCs (p) and ASC recovery (q) in cultures containing anti-Ig for the indicated  
1352 time ((+), (+), (-,-) or (+,-)).  
1353 Summary of data (r) showing that ASC development from T-bet<sup>hi</sup>IRF4<sup>int</sup> B<sub>DN</sub> population requires removal  
1354 of anti-Ig from the cultures between days 3-6.  
1355 RNA-seq IPA analysis was performed on n=3 samples/subset derived from 3 independent paired co-  
1356 culture experiments. Data in c-o are representative of ≥3 experiments. The percentage of cells in each  
1357 division, the frequency of ASCs and cell recovery (total and ASCs) are shown as the mean ± SD of  
1358 cultures containing purified B<sub>N</sub> cells from 3 independent donors. Data shown in (p-q) are from a single  
1359 SLE individual and are representative of 2 independent experiments. Statistical analyses (l, n, o, q) were  
1360 performed using one-way ANOVA with Tukey's multiple comparison test. *P* values \*<0.05, \*\*<0.01,  
1361 \*\*\*<0.001, \*\*\*\*<0.0001.  
1362  
1363 **Figure 6. Development of T-bet<sup>hi</sup>IRF4<sup>int</sup> B<sub>DN</sub> pre-ASCs and ASCs is controlled by IFN<sub>γ</sub>, R848, IL-2**  
1364 **and IL-21.** CTV-labeled HD B<sub>N</sub> cells were activated with anti-Ig + cytokine cocktail (IFN<sub>γ</sub>, IL-2, IL-21,  
1365 Baff) and R848 for 3 days (Step 1) and then cultured for an additional 3 days (Step 2) with cytokine  
1366 cocktail and R848 ("ALL" condition). Alternatively, individual stimuli (as indicated) were excluded from  
1367 the cultures for all 6 days (a). Cells were analyzed by flow cytometry on days 3 (b) and 6 (c-h). T-bet  
1368 and IRF4 expression (b) on day 3 in "ALL" cultures or cultures lacking the indicated stimulus.  
1369 Representative flow panels showing CTV dilution (c) with quantitation showing % of cells in each cell  
1370 division (d) and cell recovery (e). Representative flow panels showing % ASCs (f) with quantitation  
1371 showing % ASCs (g) and ASC recovery (h). Summary of data (i) showing that development of the T-

1372  $\text{bet}^{\text{hi}}\text{IRF4}^{\text{int}} \text{B}_{\text{DN}}$  pre-ASC population requires  $\text{IFN}\gamma$  and that recovery of ASCs in the cultures on day 6 is  
1373 dependent on  $\text{IFN}\gamma$ , IL-2, IL-21 and R848.  
1374 Plots depicting CTV dilution,  $\text{T-bet}^{\text{hi}}\text{IRF4}^{\text{int}}$  pre-ASCs and  $\text{CD27}^{\text{hi}}\text{CD38}^{\text{hi}}$  ASCs in each culture are  
1375 representative of  $\geq 3$  experiments. The percentage of cells in each division, the frequency of ASCs and  
1376 cell recovery (total and ASCs) are shown as the mean  $\pm$  SD of cultures containing purified  $\text{B}_{\text{N}}$  cells from  
1377 3 independent healthy donors. All statistical analyses were performed using one-way ANOVA with  
1378 Tukey's multiple comparison test.  $P$  values \* $<0.05$ , \*\* $<0.01$ , \*\*\* $<0.001$ , \*\*\*\* $<0.0001$ .  
1379

1380 **Figure 7. Temporally distinct regulation of  $\text{T-bet}^{\text{hi}}\text{IRF4}^{\text{int}}$  pre-ASC and ASC development by  $\text{IFN}\gamma$ ,  
1381 **TLR7 ligand and IL21.** CTV-labeled HD  $\text{B}_{\text{N}}$  cells were activated for 3 days with anti-Ig, R848, IL-21 and  
1382  $\text{IFN}\gamma$  (Step 1), washed and then re-cultured for 3 days with R848,  $\text{IFN}\gamma$ , and IL-21 (Step 2, +,+ condition).  
1383 Alternatively, individual stimuli were included in Step 1 only (+,- condition) or in Step 2 only (-,+ condition).  
1384 **(a-h)** Cells from cultures containing  $\text{IFN}\gamma$  in Step 1, Step 2 or both steps **(a)** were analyzed by flow  
1385 cytometry on days 3 **(b)** and 6 **(c-h)**. T-bet and IRF4 expression **(b)** on day 3. CTV dilution and cell  
1386 division **(c-d)**, cell recovery **(e)**, ASC frequencies **(f-g)** and ASC recovery **(h)** by day 6 B cells.  
1387 **(i-p)** Cells from cultures containing R848 in Step 1, Step 2 or both steps **(i)** were analyzed by flow  
1388 cytometry on days 3 **(j)** and 6 **(k-p)**. T-bet and IRF4 expression **(j)** on day 3. CTV dilution and cell division  
1389 **(k-l)**, cell recovery **(m)**, ASC frequencies **(n-o)** and ASC recovery **(p)** by day 6 B cells.  
1390 **(q-x)** Cells from cultures containing IL-21 in Step 1, Step 2 or both steps **(q)** were analyzed by flow  
1391 cytometry on days 3 **(r)** and 6 **(s-x)**. T-bet and IRF4 expression **(r)** on day 3. CTV dilution and cell division  
1392 **(s-t)**, cell recovery **(u)**, ASC frequencies **(v-w)** and ASC recovery **(x)** by day 6 B cells.  
1393 **(y)** Summary of data showing that ASC development and recovery from  $\text{T-bet}^{\text{hi}}\text{IRF4}^{\text{int}} \text{B}_{\text{DN}}$  pre-ASCs  
1394 requires early “priming” signals  $\text{IFN}\gamma$  and R848 and late proliferation/differentiation signals from R848 and  
1395 IL-21.**

1396 Flow cytometry plots, depicting CTV dilution,  $\text{T-bet}^{\text{hi}}\text{IRF4}^{\text{int}}$  pre-ASCs and  $\text{CD27}^{\text{hi}}\text{CD38}^{\text{hi}}$  ASCs in each  
1397 culture, are representative of  $\geq 3$  experiments. The percentage of cells in each division, the frequency of  
1398 ASCs and cell recovery (total and ASCs) are shown as the mean  $\pm$  SD of cultures containing purified  $\text{B}_{\text{N}}$   
1399 cells from 3 independent healthy donors. All statistical analyses were performed using Student's T test.  
1400  $P$  values \* $<0.05$ , \*\* $<0.01$ , \*\*\* $<0.001$ , \*\*\*\* $<0.0001$ . TFTC = Too few to count.

1401  
1402 **Figure 8. IL-2 signals cooperate with  $\text{IFN}\gamma$  to enhance ASC recovery from stimulated  $\text{B}_{\text{N}}$  cells.**  
1403 Cartoon **(a)** depicting CTV-labeled HD  $\text{B}_{\text{N}}$  cell cultures activated for 3 days (Step 1) with anti-Ig and R848  
1404 alone (Be.0) or in combination with:  $\text{IFN}\gamma$  (Be. $\text{IFN}\gamma$ ), IL-2 (Be.IL2) or both  $\text{IFN}\gamma$  + IL-2 (Be. $\gamma$ 2) and then  
1405 washed and recultured for an additional 3 days (Step 2) with R848 and IL-21. Representative CTV dilution  
1406 plots and enumeration of cell division within the cultures on days 3 **(b-c)** and 6 **(d-e)**. Total cell recovery

1407 on days 3 (**f**) and 6 (**g**). ASC frequencies (**h-i**) and ASC recovery (**j**) in day 6 cultures.  
1408 Flow cytometry plots depicting CTV dilution and CD27<sup>hi</sup>CD38<sup>hi</sup> ASCs in each culture are representative  
1409 of  $\geq 3$  experiments. The percentage of cells in each division, the frequency of ASCs and cell recovery  
1410 (total and ASCs) are shown as the mean  $\pm$  SD of cultures containing purified B<sub>N</sub> cells from 2 independent  
1411 healthy donors. All statistical analyses were performed using one-way ANOVA with Tukey's multiple  
1412 comparison test. *P* values \* $<0.05$ , \*\* $<0.01$ , \*\*\* $<0.001$ , \*\*\*\* $<0.0001$ .

1413  
1414 **Figure 9. IFN $\gamma$  signaling enhances B cell responses to TLR7/8 ligands and IL-21.** (**a-c**) IFN $\gamma$   
1415 synergizes with subthreshold doses of TLR7/8 ligand to induce proliferation and differentiation of B<sub>N</sub> cells.  
1416 CTV-labeled HD B<sub>N</sub> cells were activated for 3 days (Step 1) with anti-Ig, IL-2, and R848 in the presence  
1417 or absence of IFN $\gamma$  (10ng/ml). Cells were washed and re-cultured for 3 additional days (Step 2) with IL-  
1418 21 and the same concentration of R848 that was used in Step 1. B cell division on day 6 (**a**) in cultures  
1419 that were activated with (green circles) or without (orange circles) IFN $\gamma$  in the presence of no R848  
1420 (0 $\mu$ g/ml, **left panel**), low dose R848 (0.1  $\mu$ g/ml, **center panel**) and high dose R848 (10  $\mu$ g/ml, **right**  
1421 **panel**). The frequency of CD38<sup>hi</sup>CD27<sup>hi</sup> ASCs (**b**) present in each culture condition on day 6 is shown.  
1422 (**c**) CTV-labeled naïve B cells were activated for 3 days with anti-Ig, IL-2 and normally non-stimulatory  
1423 doses of R848 (0-0.1 $\mu$ g/ml) in combination with different concentrations of IFN $\gamma$  (0-10ng/ml). Cells were  
1424 washed and re-cultured for 3 additional days with IL-21 and the same concentration of R848 used in Step  
1425 1. The frequency of ASCs in the indicated cultures on day 6 is reported.

1426 (**d-g**) Early IFN $\gamma$  signals control IL-21R expression levels. Cartoon (**d**) depicting culture conditions to  
1427 generate Be.0, Be.IFN $\gamma$ , Be.IL2 and Be. $\gamma$ 2 cells from CTV-labeled HD B<sub>N</sub> cells. IL-21R expression was  
1428 measured on day 3 (**e**) and day 6 (**f-g**) and reported as MFI.

1429 (**h-o**) Early IFN $\gamma$  signals control IL-21R signaling. Day 3 (**i-k**) or Day 4 (**m-o**) Be.0, Be.IFN $\gamma$ , Be.IL2 and  
1430 Be. $\gamma$ 2 cells were generated from HD B<sub>N</sub> cells as shown in the cartoons (**h,i**). Representative pSTAT3  
1431 expression levels in cells under basal conditions (no restimulation, **i,m**) or following 20 min IL-21  
1432 restimulation (**j,m**). Data are reported as Mean Fluorescence Intensity of pSTAT3 on day 3 (**k**) and day  
1433 4 (**o**).

1434 Flow cytometry plots depicting IL21R expression and pSTAT3 levels in B cells from the indicated cultures  
1435 are representative of  $\geq 2$  experiments. Data in **a-c** are representative of 2 independent experiments with  
1436 (**c**) showing the mean  $\pm$  SD of experimental replicates. Data in **o** and **k** are from 2 (**o**) or 3 (**k**) independent  
1437 donors and are shown as mean  $\pm$  SD. Statistical analyses were performed using one-way ANOVA with  
1438 Tukey's multiple comparison test (**k,o**).

1439  
1440 **Figure 10. IFN $\gamma$  signaling enhance chromatin accessibility and prepares BCR and TLR activated B**  
1441 **cells to differentiate.** (**a-j**) Analysis of chromatin accessibility in IFN $\gamma$ -activated B cells. Cartoon (**a, left**)

1442 depicting generation of day 3 Be.0, Be.IFN $\gamma$ , Be.IL2 and Be. $\gamma$ 2 cells from HD B<sub>N</sub> cells. Heatmap (**a, right**)  
1443 of ATAC-seq data ([Supplementary File 3](#)) from the four B cell subsets showing 15,917 differentially  
1444 accessible regions (DAR) based on FDR<0.05.

1445 (**b**) Heatmap depicting enrichment of accessible transcription factor motifs in day 3 Be.IFN $\gamma$ , Be.IL2 and  
1446 Be. $\gamma$ 2 subsets generated from HD B<sub>N</sub> cells. Data are shown as normalized motif enrichment within each  
1447 subset relative to Be.0 cells. Motif grouping (indicated on left) showing transcription factors that are  
1448 enriched for accessibility in 1 subset, 2 subsets or all 3 subsets. [See Supplementary File 4](#) for complete  
1449 results of Homer *de novo* Motif Results.

1450 (**c-h**) Chromatin accessibility for NF- $\kappa$ B p65 (**c**), NF- $\kappa$ B REL (**d**), STAT5 (**e**), T-bet (**f**), IRF4 (**g**) and  
1451 BLIMP1 (**h**) in day 3 B cell subsets. Data represented as box and whisker plots, which report reads per  
1452 million (rpm) in the 100bp surrounding the transcription factor binding motifs, or histograms, which show  
1453 accessibility at the indicated motif and for the indicated surrounding sequence. *P* values provided in  
1454 [Supplementary File 5](#); Be. $\gamma$ 2 is significantly different from all other B cell subsets in all analyses ( $P<2.2$   
1455  $\times 10^{-16}$ ).

1456 (**i-j**) Genome plot showing chromatin accessibility for the *PRMD1* (**i**) and *IL21R* (**j**) loci in day 3 Be.0,  
1457 Be.IFN $\gamma$ , Be.IL2 and Be. $\gamma$ 2 cells generated from HD B<sub>N</sub> cells. DAR are shown and consensus T-bet, IRF4  
1458 and STAT5 binding motifs within DARs are indicated. DAR are aligned with previously reported T-bet  
1459 binding sites (assessed by ChIP, (56)) and with ATAC-seq data derived from B cell subsets purified from  
1460 SLE patients (19). Data reported in rpm.

1461 (**k-n**) SLE patient T-bet<sup>hi</sup> B<sub>DN</sub> cells rapidly differentiate in ASCs. Sort purification strategy (**k-m**) to isolate  
1462 SLE B cell subsets. Peripheral blood CD19<sup>+lo</sup> B lineage cells from SLE patients were subdivided into  
1463 CD27<sup>hi</sup>CD38<sup>hi</sup> ASCs and non-ASC B cells (see [Fig. 1g](#)) that were then further subdivided into  
1464 CD11c<sup>hi</sup>CXCR5<sup>neg</sup> and CD11c<sup>lo</sup>CXCR5<sup>+</sup> cells (**k**, right panel). T-bet<sup>hi</sup> B cells were highly enriched (99%)  
1465 within the CD11c<sup>hi</sup>CXCR5<sup>neg</sup> fraction (**l**) while T-bet<sup>lo/neg</sup> cells were contained exclusively within the  
1466 CD11c<sup>lo</sup>CXCR5<sup>+</sup> fraction (**l**). The CD11c<sup>hi</sup>CXCR5<sup>lo</sup> (T-bet<sup>hi</sup>) and CD11c<sup>neg</sup>CXCR5<sup>+</sup> (T-bet<sup>lo</sup>) B cells were  
1467 further subdivided (**m**) based on expression of IgD and CD27 and sort-purified as T-bet<sup>lo</sup> B<sub>N</sub> cells (black  
1468 gate, CD11c<sup>lo</sup>CXCR5<sup>+</sup>IgD<sup>+</sup>CD27<sup>neg</sup>), T-bet<sup>lo</sup> B<sub>DN</sub> cells (purple gate, CD11c<sup>lo</sup>CXCR5<sup>+</sup>IgD<sup>neg</sup>CD27<sup>neg</sup>, also  
1469 referred to as DN1 cells (19)), T-bet<sup>lo</sup> B<sub>SW</sub> cells (green gate, CD11c<sup>lo</sup>CXCR5<sup>+</sup>IgD<sup>neg</sup>CD27<sup>+</sup>) and T-bet<sup>hi</sup>  
1470 B<sub>DN</sub> cells (red gate, CD11c<sup>hi</sup>CXCR5<sup>neg</sup>IgD<sup>neg</sup>CD27<sup>neg</sup>, also referred to as DN2 cells (19)). Purified SLE B  
1471 cell subsets were stimulated with cytokines (IFN $\gamma$ , IL-21, IL-2, Baff) and R848 for 2.5 days then counted  
1472 and transferred to anti-IgG ELISPOT plates for 6 hrs. The frequency of IgG ASCs (**n**) derived from each  
1473 B cell subset is shown.

1474 ATAC-seq analysis was performed on 3 independent experimental samples/group over 2 experiments.  
1475 Box plots show 1<sup>st</sup> and 3<sup>rd</sup> quartile range (box) and upper and lower range (whisker) of 2 samples/group.  
1476 Data reported in (**n**) are representative of 3 independent experiments using B cells sorted from 3 different



1477 SLE donors. *P* values for enrichment of transcription factor binding motifs (**c-h**) are provided in  
1478 [Supplementary File 5](#). Statistical analysis in (**n**) was performed with unpaired ANOVA on triplicate  
1479 experimental replicates. *P* values \* $<0.05$ , \*\* $<0.01$ , \*\*\* $<0.001$ , \*\*\*\* $<0.0001$ .

1480

1481

1482 **Supplemental Figures and Files**

1483

1484 **Figure 1-figure supplement 1. Development of SLE in TLR7-overexpressing mice requires T-bet<sup>+</sup>**

1485 **B cells.** Cartoon (a) depicting generation of SLE-prone bone marrow *Yaa.Fcgr2b<sup>-/-</sup>* chimeras lacking T-

1486 bet in all B lineage cells or in 20% of all hematopoietic cells. To generate *Yaa.Fcgr2b<sup>-/-</sup>* mice with selective

1487 deletion of T-bet in B cells (B:YFT), we reconstituted lethally irradiated B cell deficient  $\mu$ MT mice with a

1488 mixture of 80% B cell deficient *Yaa.Fcgr2b<sup>-/-</sup>*. $\mu$ MT BM + 20% *Yaa.Fcgr2b<sup>-/-</sup>.Tbx21<sup>-/-</sup>* BM (B-YFT chimeras).

1489 In these chimeras all hematopoietic cells, including B cells, will carry the autoimmune loci (*Yaa.Fcgr2b<sup>-/-</sup>*

1490 ). Furthermore, all B cells (100%) and ~20% of cells in all other hematopoietic cells in these animals will

1491 be T-bet deficient (*Tbx21<sup>-/-</sup>*). For controls (20%Control), we reconstituted irradiated  $\mu$ MT hosts with 80%

1492 *Yaa.Fcgr2b<sup>-/-</sup>* BM + 20% *Yaa.Fcgr2b<sup>-/-</sup>.Tbx21<sup>-/-</sup>* (20%Control). In these chimeras all hematopoietic cells,

1493 including B cells, will carry the autoimmune loci (*Yaa.Fcgr2b<sup>-/-</sup>*). In addition, 20% of all hematopoietic

1494 cells, including B cells, will be T-bet deficient. Flow cytometry analysis (b) showing T-bet expression by

1495 B cells isolated from the cervical lymph node (cLN) of a representative B:YFT and 20% control mouse at

1496 35 weeks post-bone marrow reconstitution. (c) Representative images and quantification of anti-nuclear

1497 antibodies (ANAs) in serum from chimeras at 24 weeks post-transplant. (d) Kidney function reported as

1498 the urinary albumin:creatinine ratio (UACR) in individual chimeras at 24 weeks post-transplant. (e)

1499 Mantel-Cox survival curve of chimeras up to 35 weeks post-transplant.

1500 Representative data shown as mean  $\pm$  SD from 1 of 2 independent experiments with 7-10 mice per group.

1501 Statistical analyses were performed using a Student's t test (c-d) and Mantel-Cox survival test (e).

1502

1503 **Figure 3-figure supplement 1. ASC formation is enhanced in co-cultures containing**

1504 **B<sub>N</sub> and Th1 cells (Be1 co-cultures) relative to co-cultures containing B<sub>N</sub> and Th2 cells (Be2 co-**

1505 **cultures).** (a-j) Proliferation analysis of ASCs and B cells in 3 independent paired day 5-6 Be1 and Be2

1506 co-cultures. Co-cultures generated with purified CTV-labeled HD B<sub>N</sub> cells and allogeneic Th1 or Th2 cells

1507 + IL-21 and IL-2. B lineage cells gated as CD19<sup>+lo</sup>, which includes both CD19<sup>lo</sup>CD38<sup>hi</sup> ASCs and non-

1508 ASC B cells (see panels d-f for representative flow plots). Data reported as the proportion of total CD19<sup>+lo</sup>

1509 B lineage cells (a-c) in each cell division or the fraction of cells within each cell division that are ASCs (g-

1510 i). Proliferation history of ASCs in Be1 and Be2 cultures (j) reports the fraction of ASCs from the Be1 and

1511 Be2 co-cultures (shown in panel c, f, i) that are in division 5, 6 and 7. Although there is a 10-fold reduction

1512 in ASCs in Be2 co-cultures, the ASCs that are present in the Be2 co-cultures have divided the same

1513 number of times as the ASCs in the Be1 co-cultures.

1514 (k) Gating strategy to identify unswitched and isotype switched ASCs in Be1 and Be2 co-cultures.

1515 Representative flow plots showing intracellular IgM, IgA and IgG staining on ASC-gated cells (from panel

1516 f) in paired Be1 and Be2 co-cultures. Data are reported as the frequency of intracellular IgM, IgG or IgA

1517 expressing CD38<sup>hi</sup>CD19<sup>lo</sup> ASCs within either the total CD19<sup>+lo</sup> B lineage compartment (black font) or

1518 within the total ASCs (bold purple font).

1519

1520 **Supplementary File 1. RNA-seq analysis of *in vitro* generated IgD<sup>neg</sup>CD27<sup>neg</sup> B<sub>DN</sub> Be1 and Be2 cells.**

1521 RNA-seq analysis of sorted IgD<sup>neg</sup>CD27<sup>neg</sup> B<sub>DN</sub> Be1 and Be2 cells isolated from Th1/B<sub>N</sub> and Th2/B<sub>N</sub> co-  
1522 cultures. Data are shown as rpk values from 3 independent Be1 and Be2 co-cultures that were set up  
1523 with donor-matched sets of allogeneic B<sub>N</sub> cells and *in vitro* polarized Th1 or Th2 cells. Log2 fold change  
1524 (Be1/Be2), *P* and FDR values reported.

1525

1526 **Supplementary File 2. Up DEG list from T-bet expressing B<sub>DN</sub> cells from SLE patients.** RNA-seq

1527 analysis was previously performed (19) on sort-purified T-bet<sup>hi</sup>-expressing IgD<sup>neg</sup>CD27<sup>neg</sup>IgG<sup>+</sup>CXCR5<sup>neg</sup>  
1528 B cells from HD and SLE patients (DN2 cells). The DN2 Up DEG list is defined as genes that are  
1529 significantly upregulated in SLE and HD DN2 cells relative to at least one other B cell subset (B<sub>N</sub>, B<sub>SW</sub> or  
1530 CXCR5-expressing (T-bet<sup>lo</sup>) DN1 cells).

1531

1532 **Supplementary File 3. ATAC-seq data set from day 3 Be.0, Be.IFN<sub>γ</sub>, Be.IL2 and Be.γ2 B cell**

1533 **subsets.** HD B<sub>N</sub> cells were activated for 3 days with anti-Ig and R848 alone (Be.0) or in combination with:  
1534 IFN<sub>γ</sub> (Be.IFN<sub>γ</sub>), IL-2 (Be.IL2) or both IFN<sub>γ</sub> + IL-2 (Be.γ2). ATAC-seq analysis was performed on DNA  
1535 isolated from each B cell subset. Table includes all identified differentially accessible regions (DAR) with  
1536 fold change and FDR *q* values for each comparison. N=2 independent samples/group.

1537

1538 **Supplementary File 4. Transcription factor motif enrichment in ATAC-seq DAR.** To identify

1539 transcription factor binding motifs that are enriched in DARs identified in the ATAC-seq data set (See  
1540 [Supplementary File 3](#)), the findMotifsGenome.pl function of HOMER v4.8.2 with the 'de novo' output were  
1541 used for analysis. DARs analyzed are upregulated in Be.IFN<sub>γ</sub> over Be.0, Be.IL-2 over Be.0 and Be.γ2  
1542 over Be.0 (separate tabs). Table includes the list of transcription factors binding motifs, which are sorted  
1543 in rank order according to *P* value.

1544

1545 **Supplementary File 5. P values for ATAC-seq motif enrichment comparisons.** *P* values for

1546 chromatin accessibility at transcription factor consensus DNA binding motifs (T-bet, IRF4, BLIMP1, NF-  
1547 kB p65 and NF-kB REL) in ATAC-seq data. Comparisons include two-sided Student's t-test comparisons  
1548 with data from day 3 Be.0, Be.IFN<sub>γ</sub>, Be.IL2 and Be.γ2 cells.

1549

1550 **Supplementary File 6. Complete statistical information for all data presented in this manuscript.**

1551

1552

1553

**Figure 1**

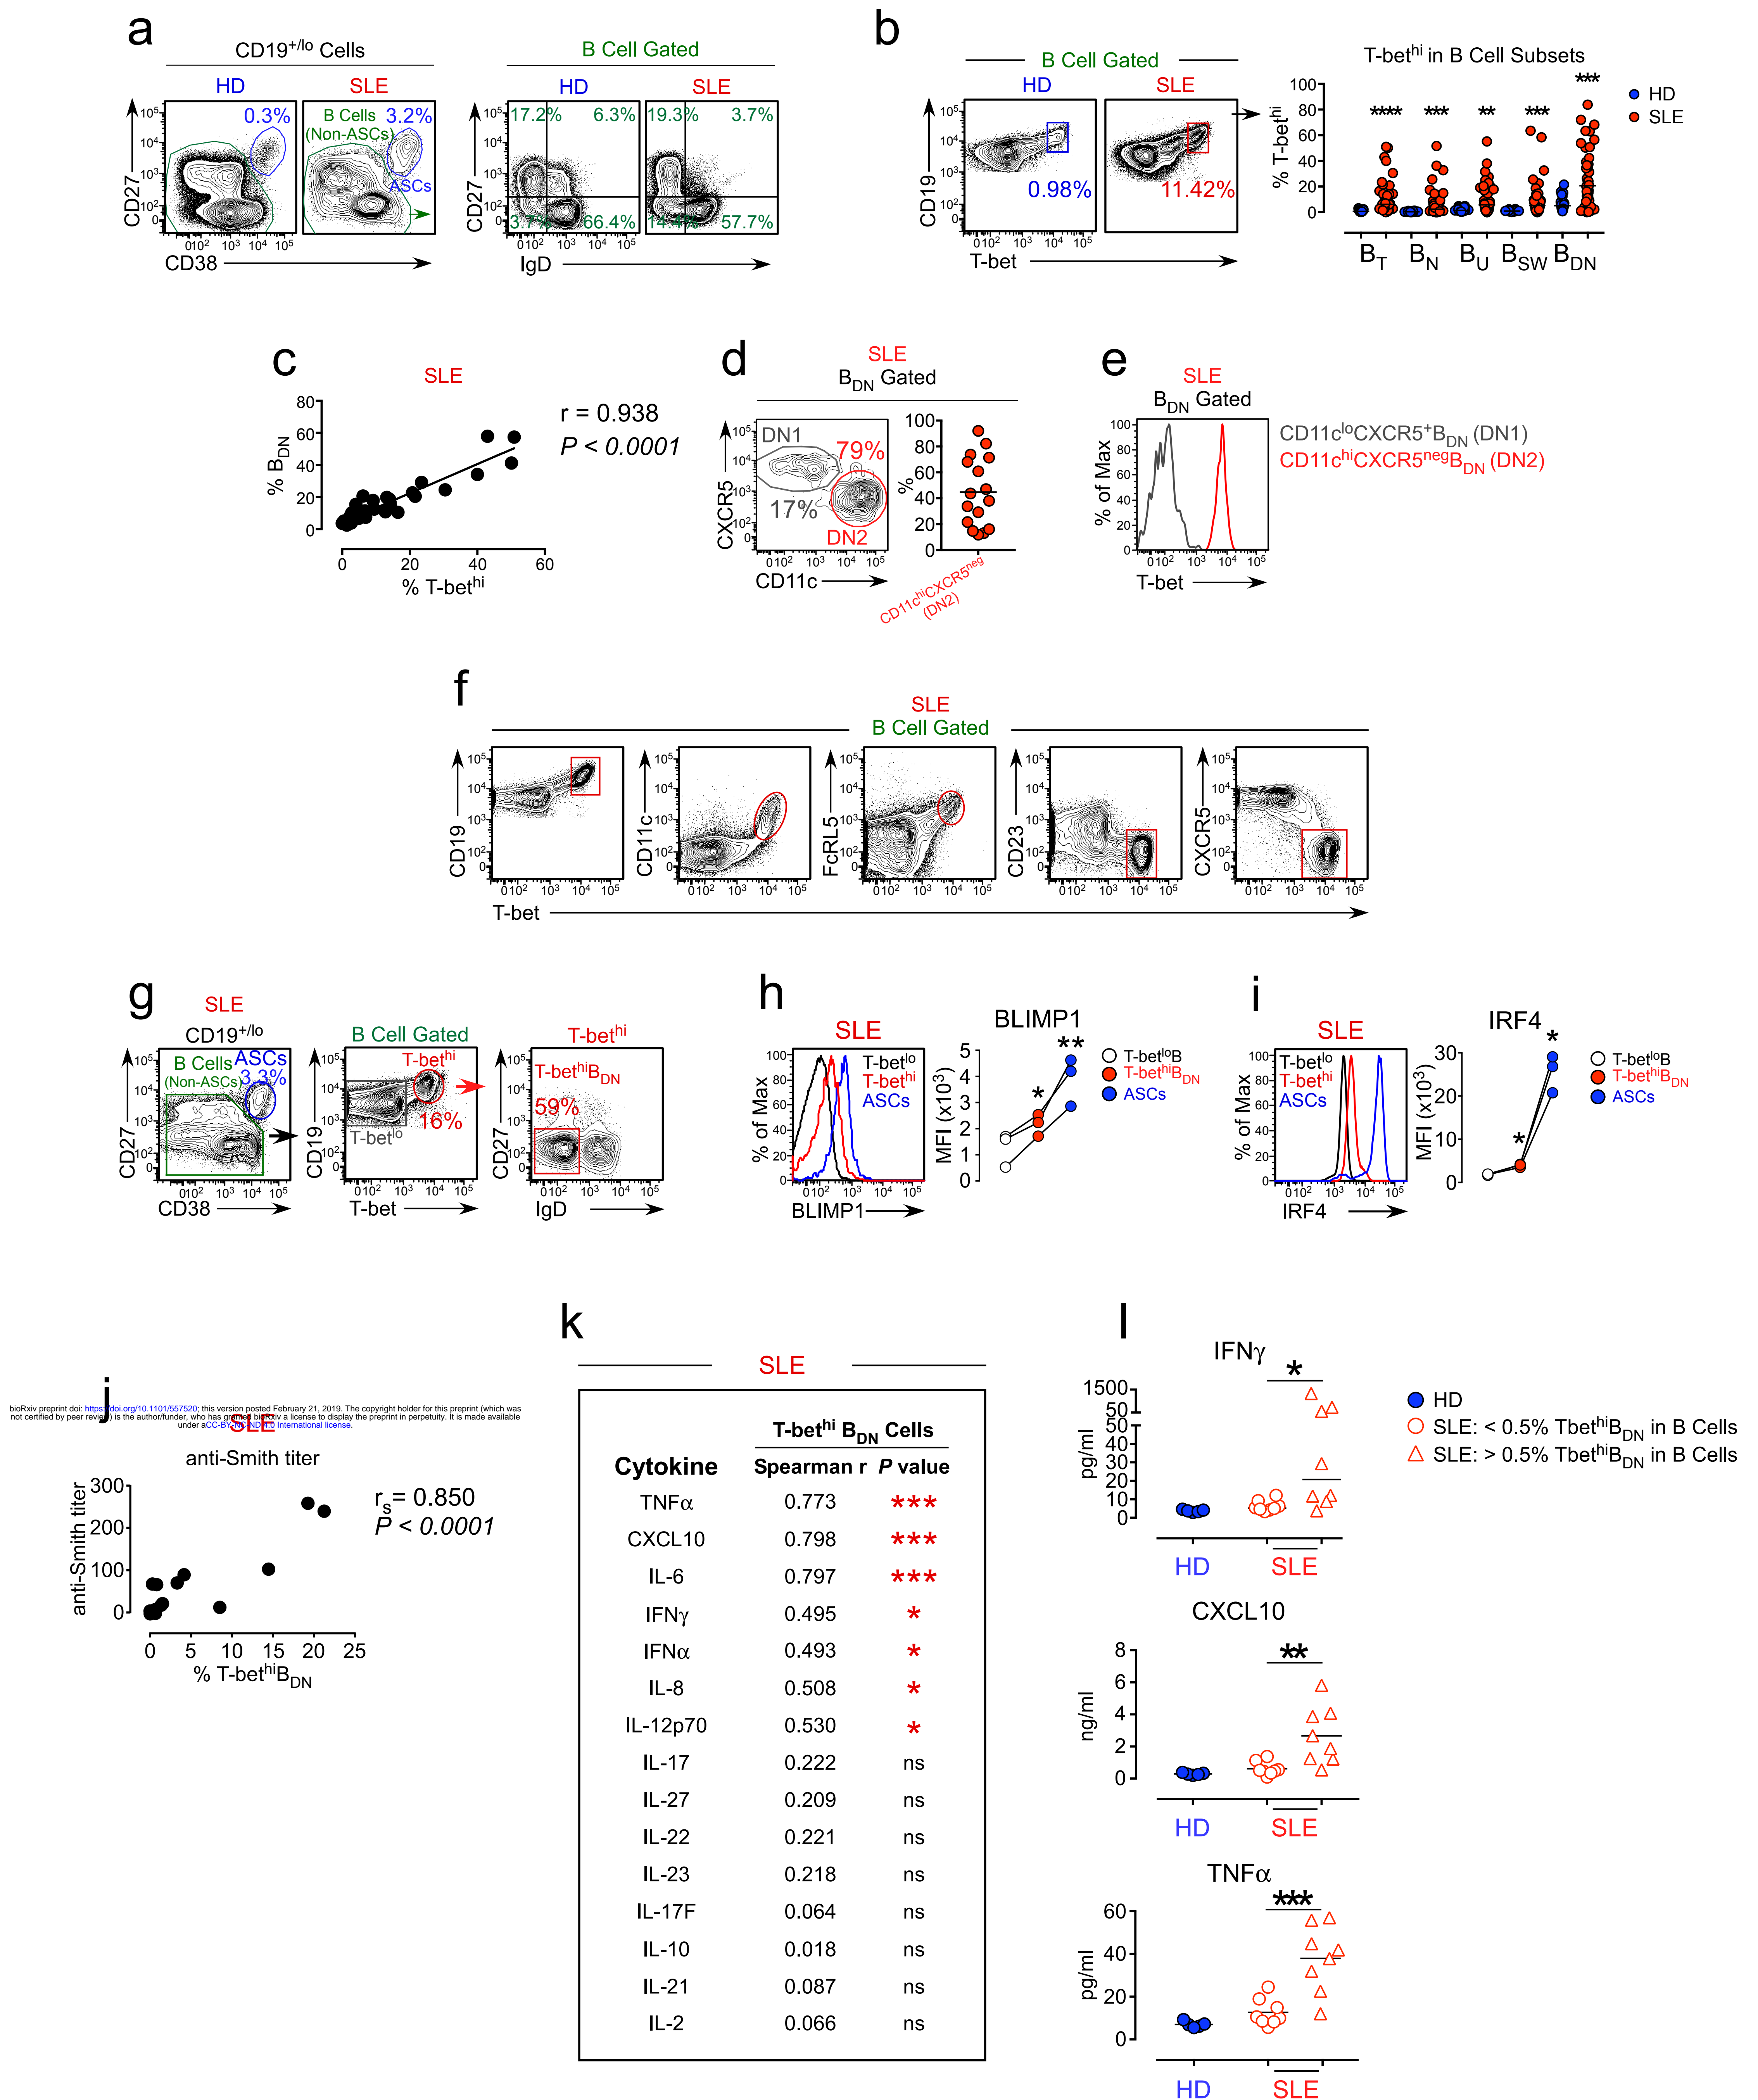

**Figure 2**

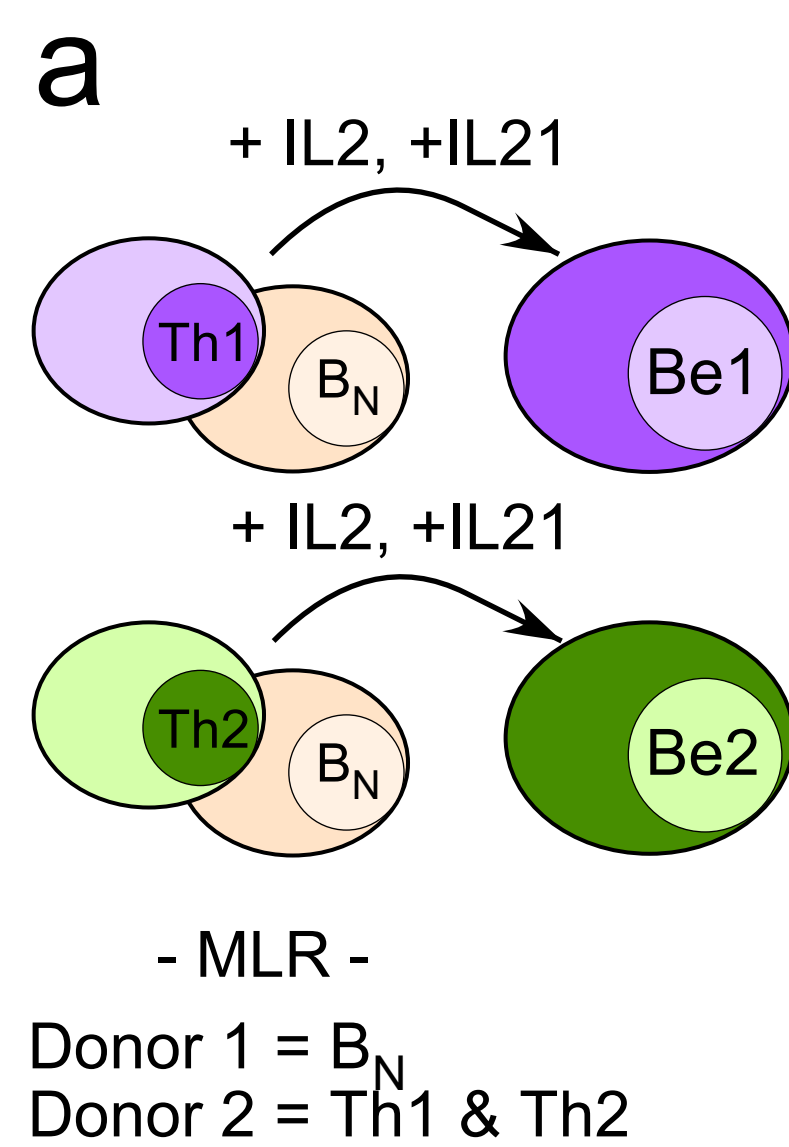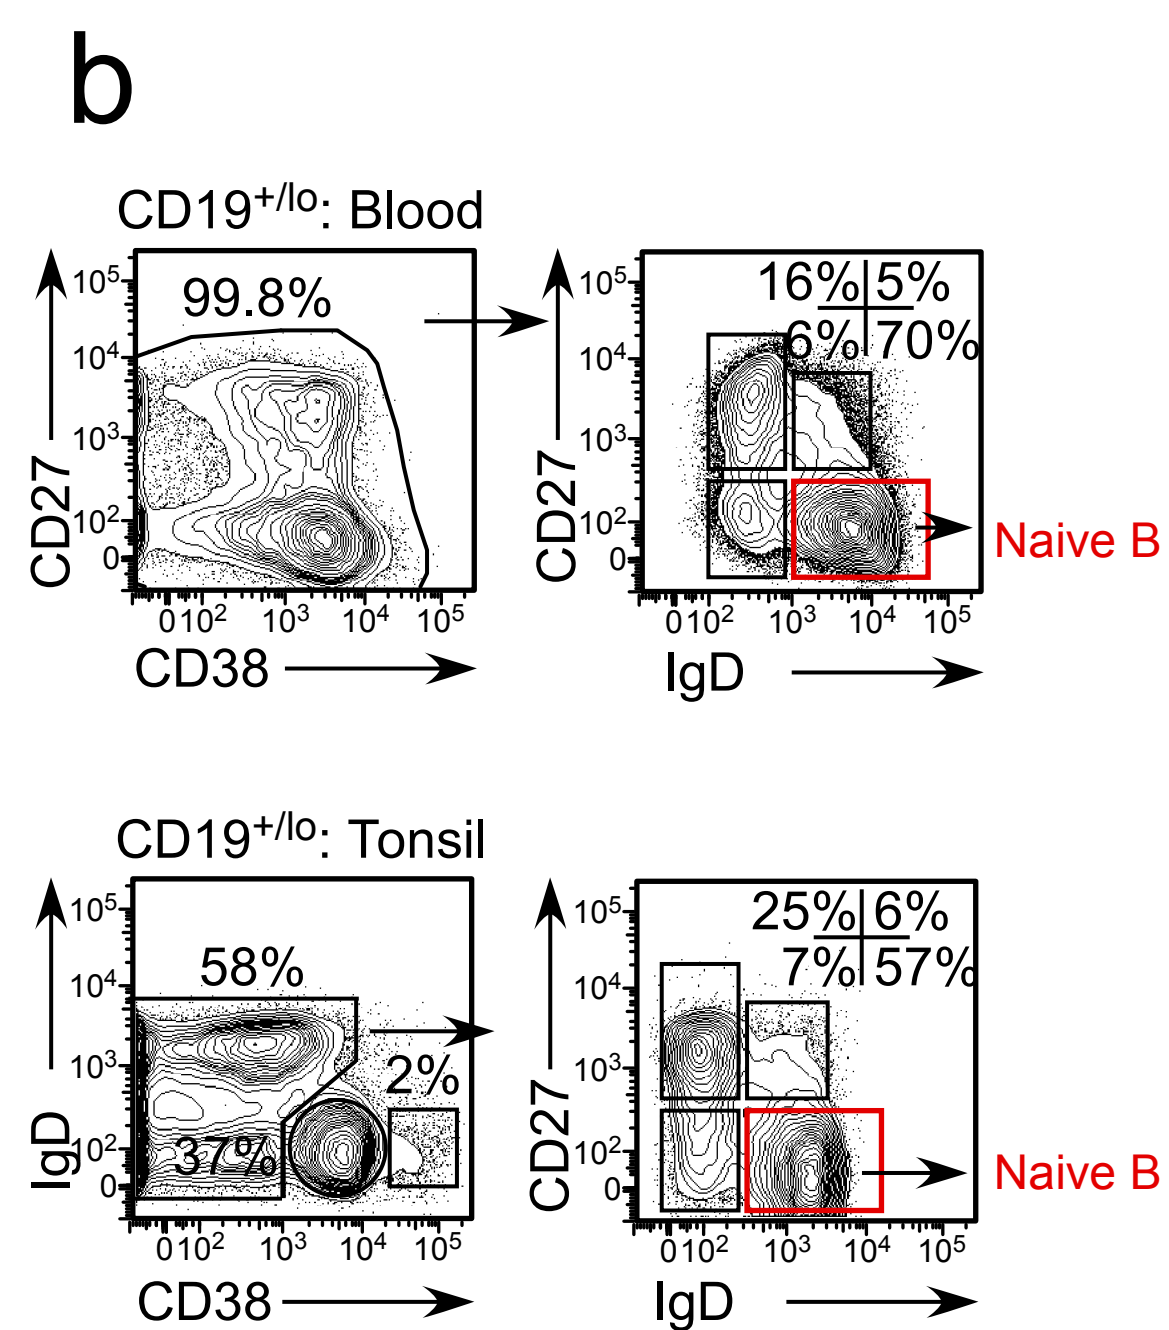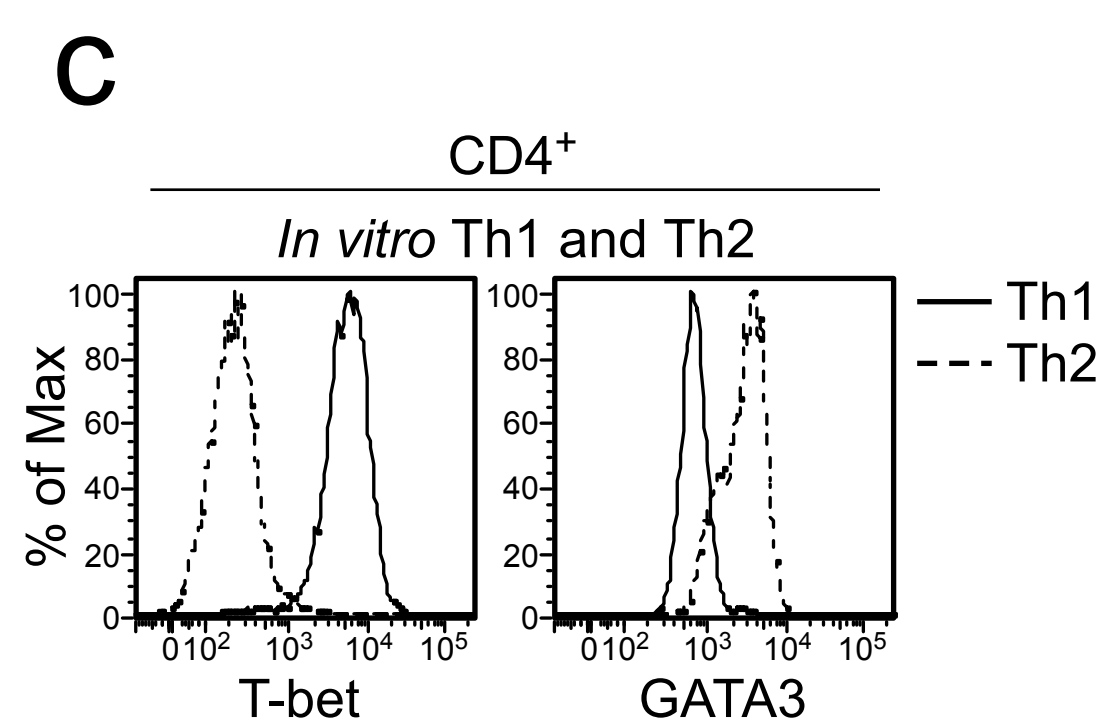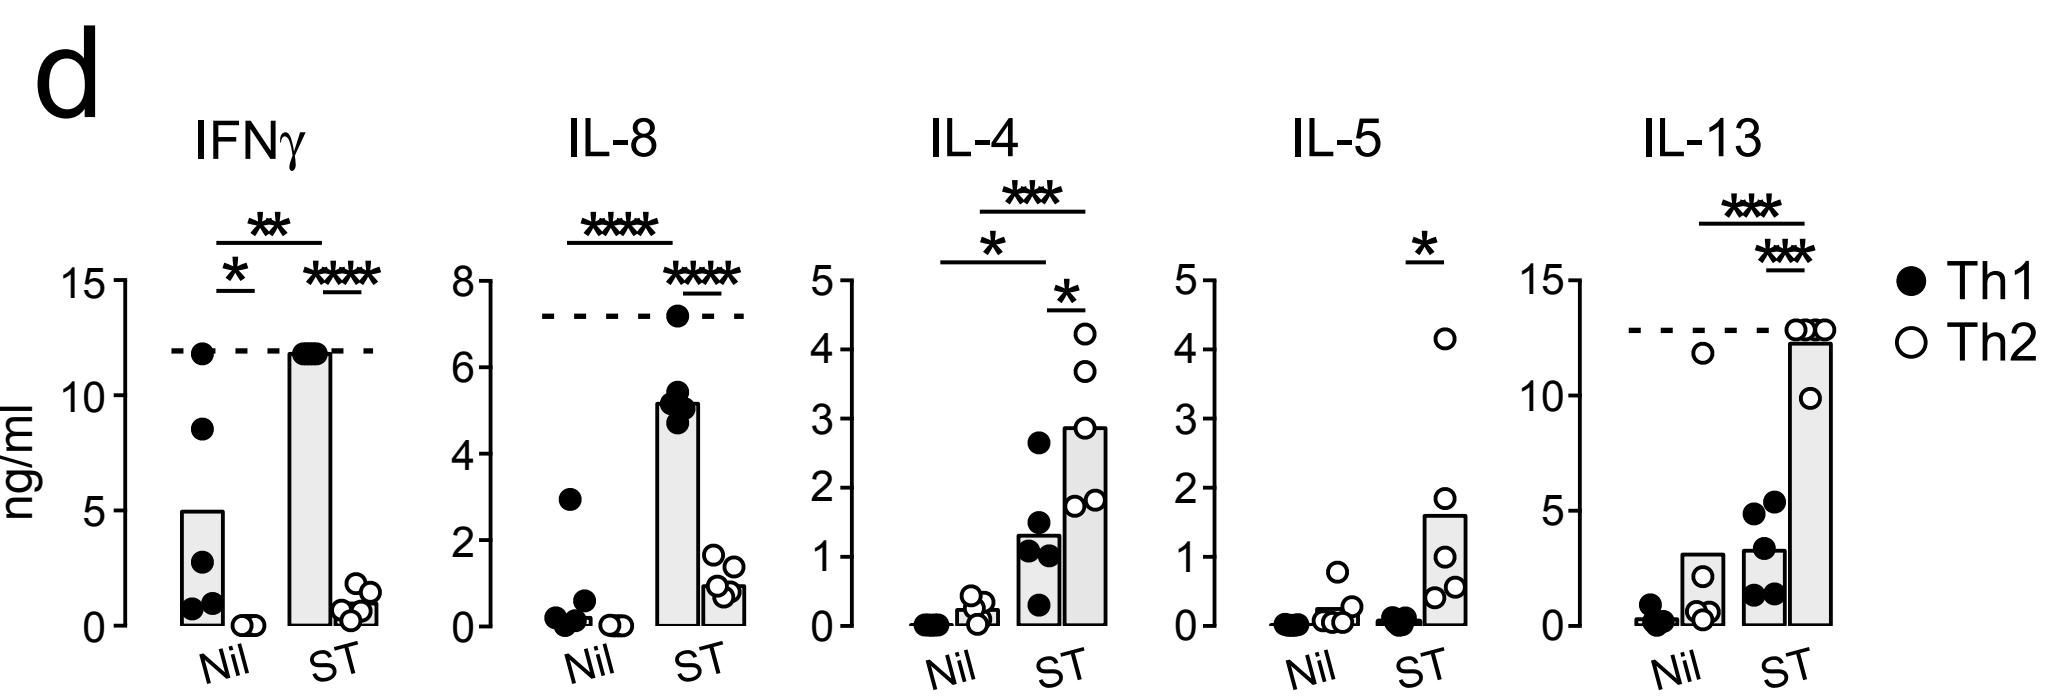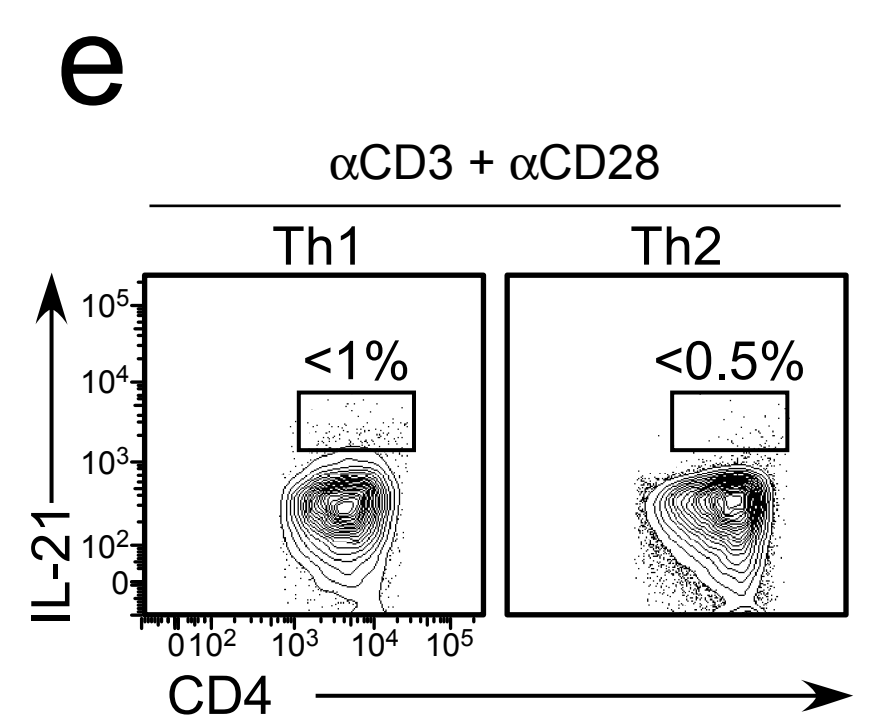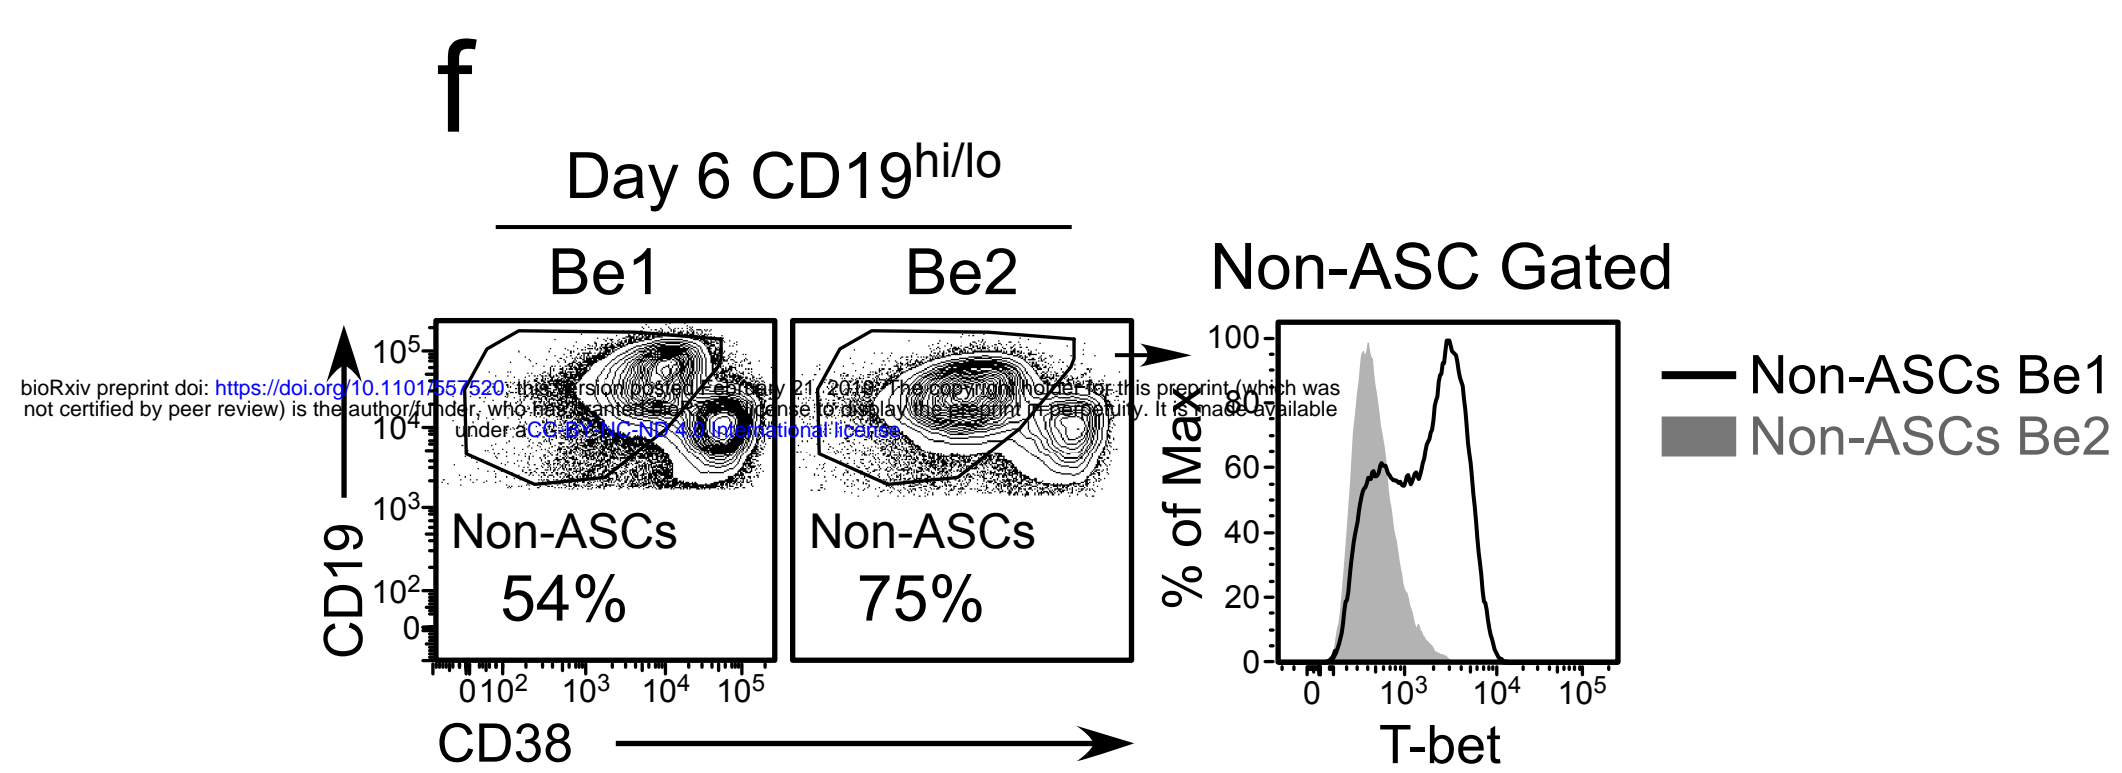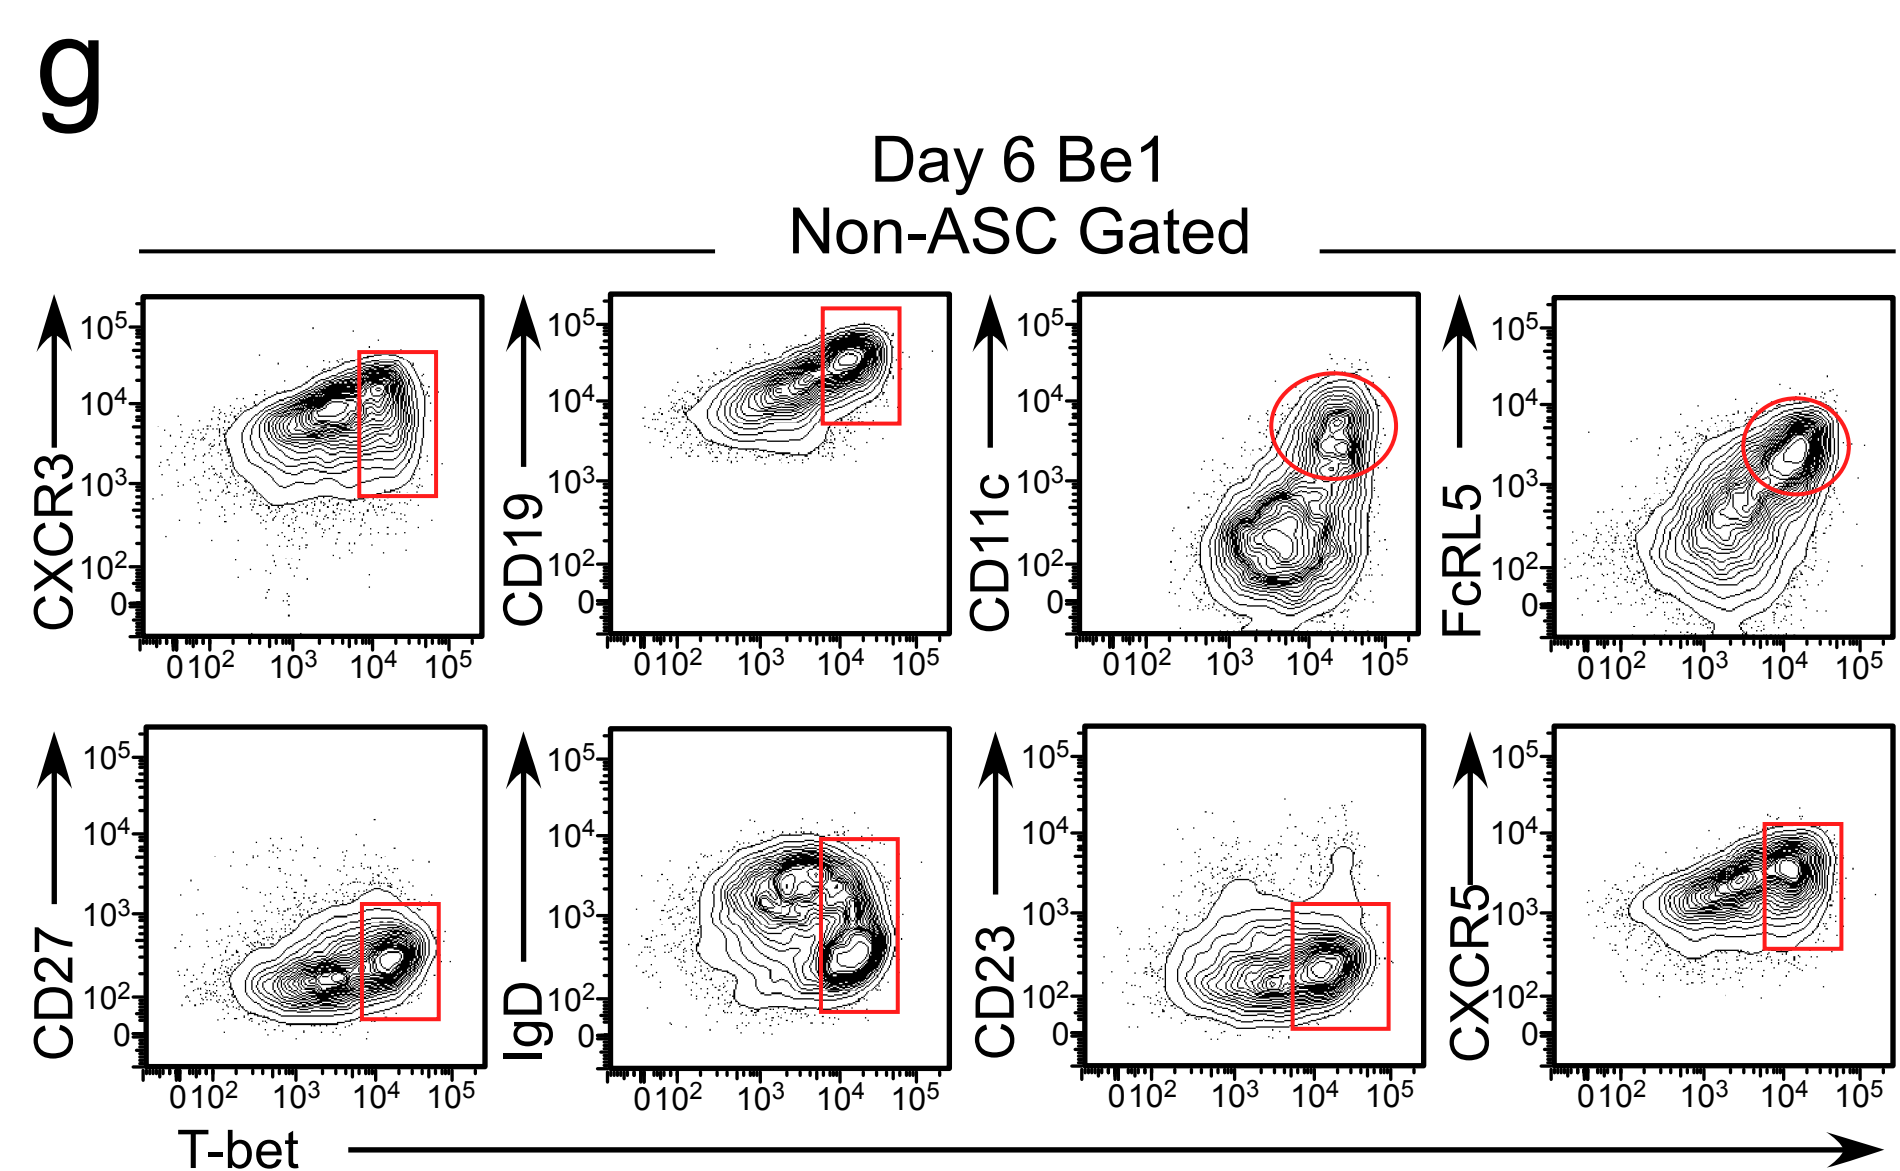

**Figure 3**

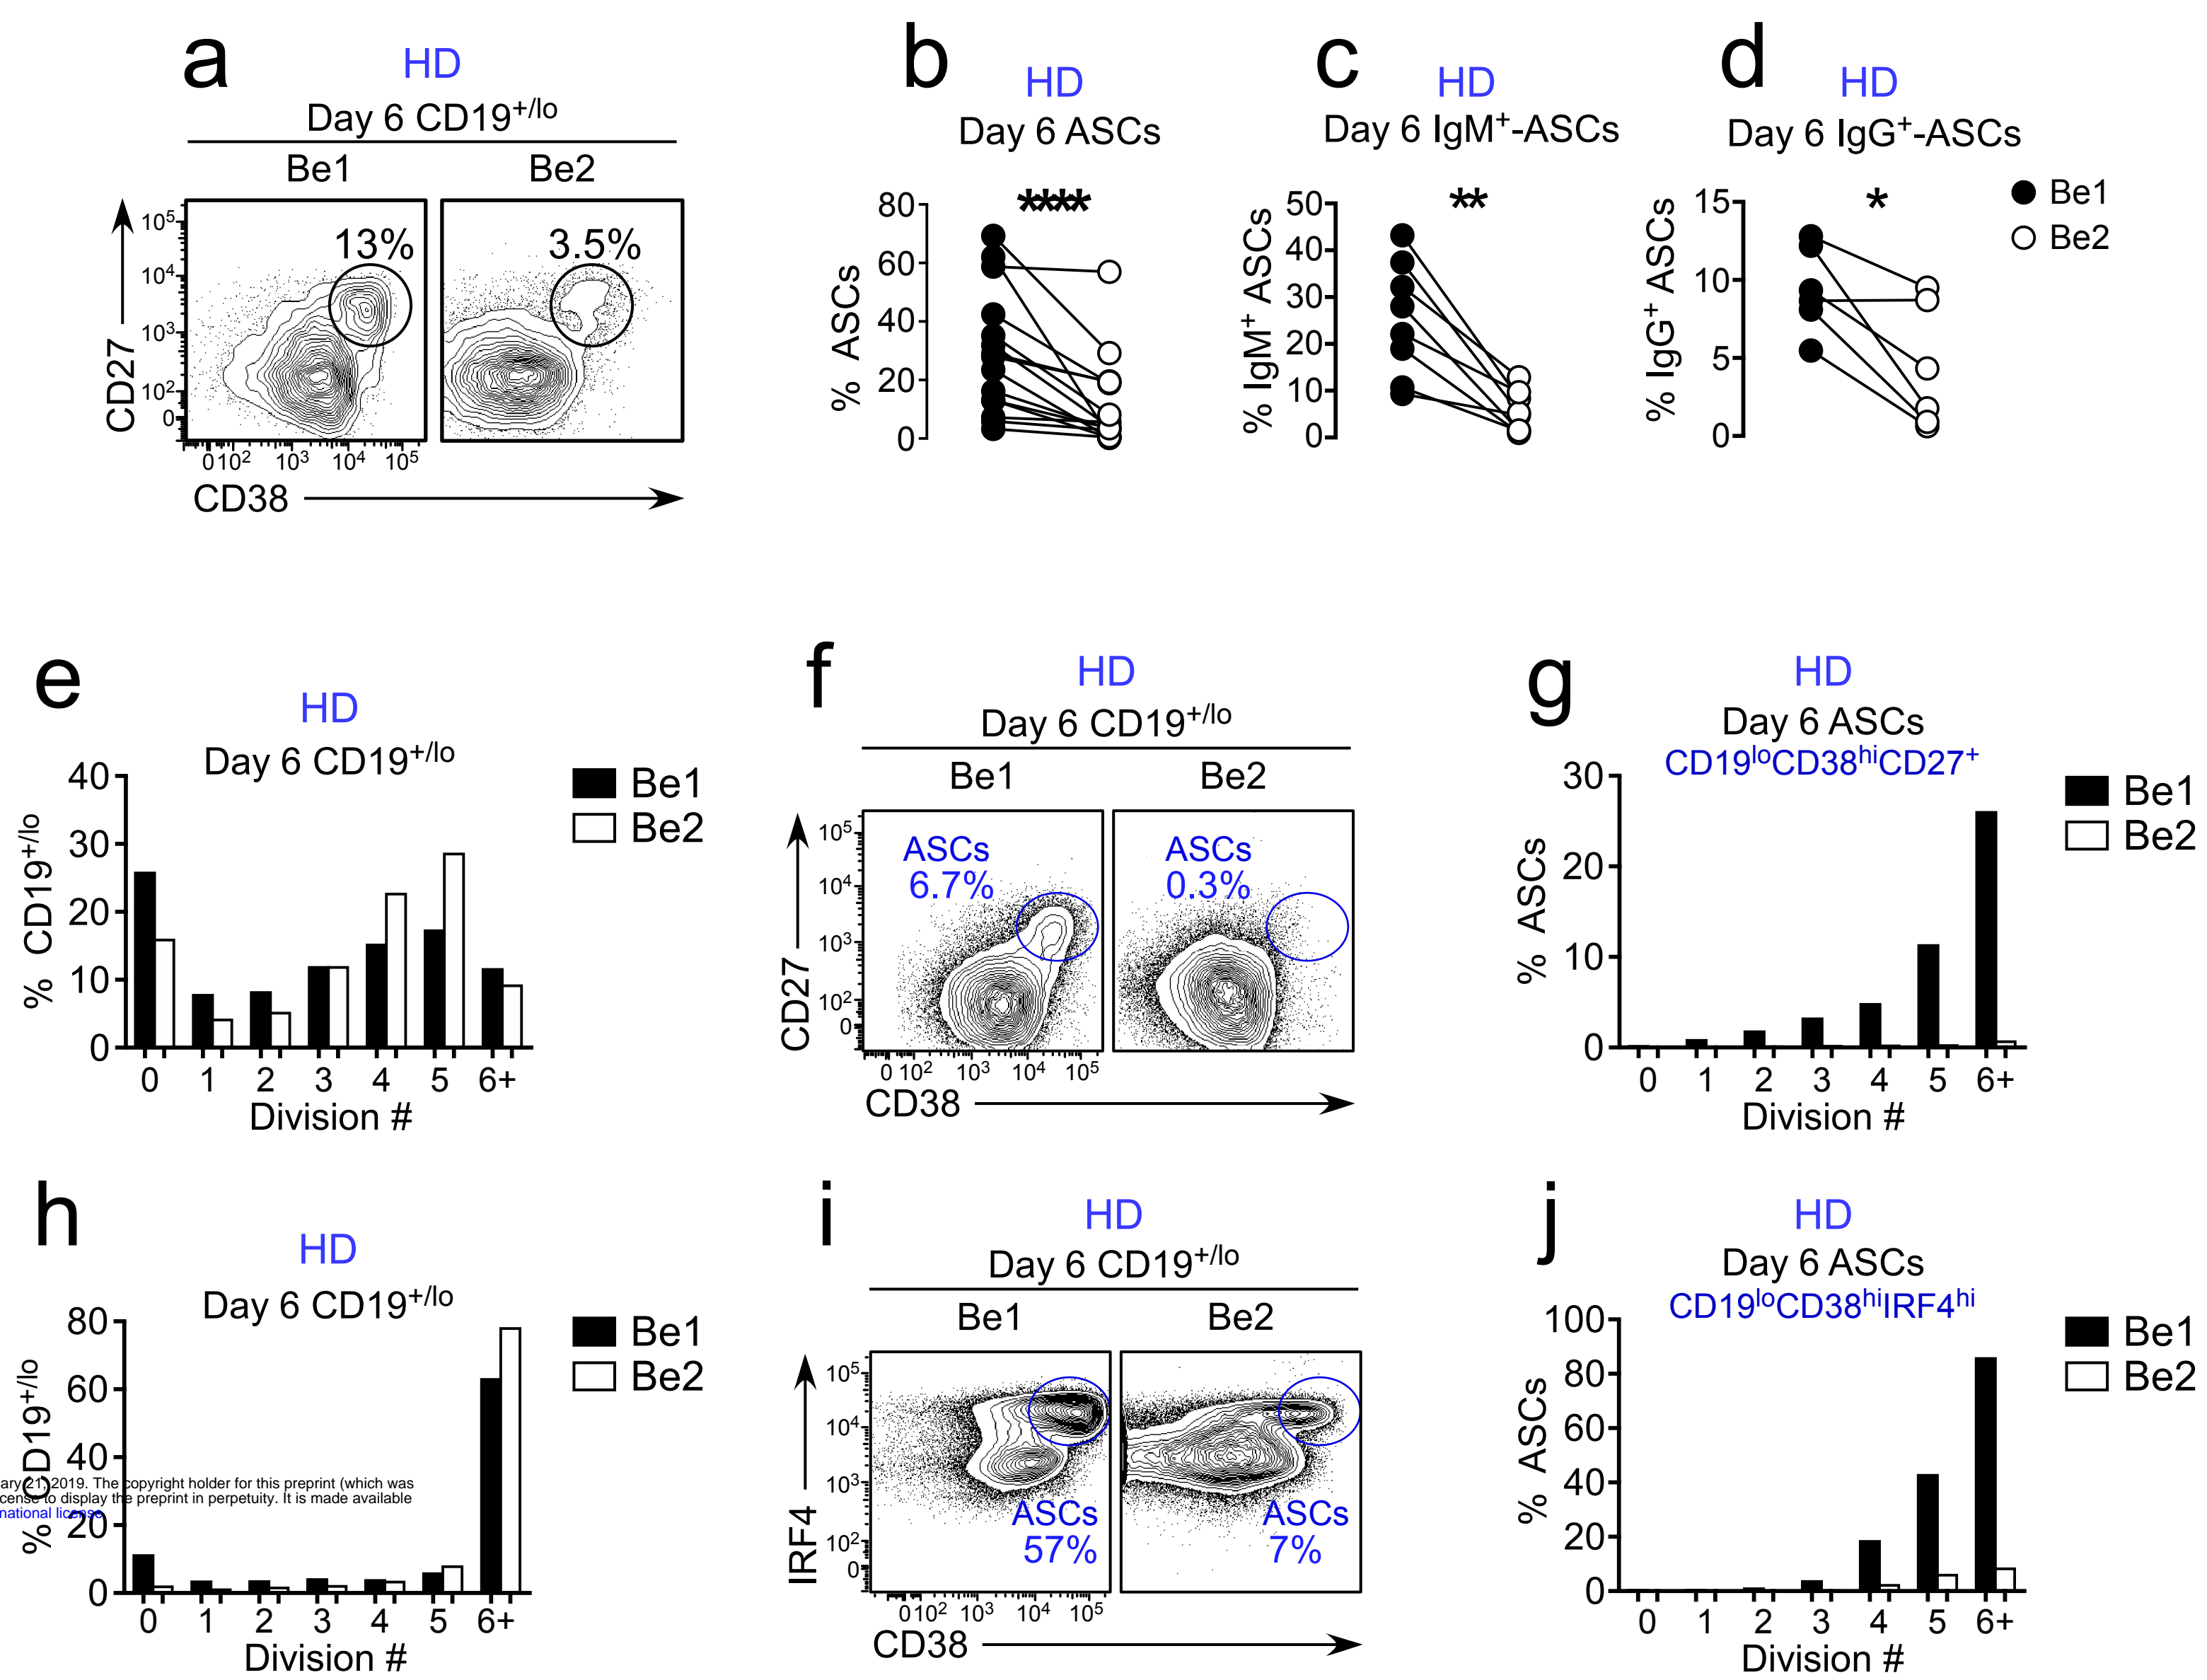

**Figure 4**

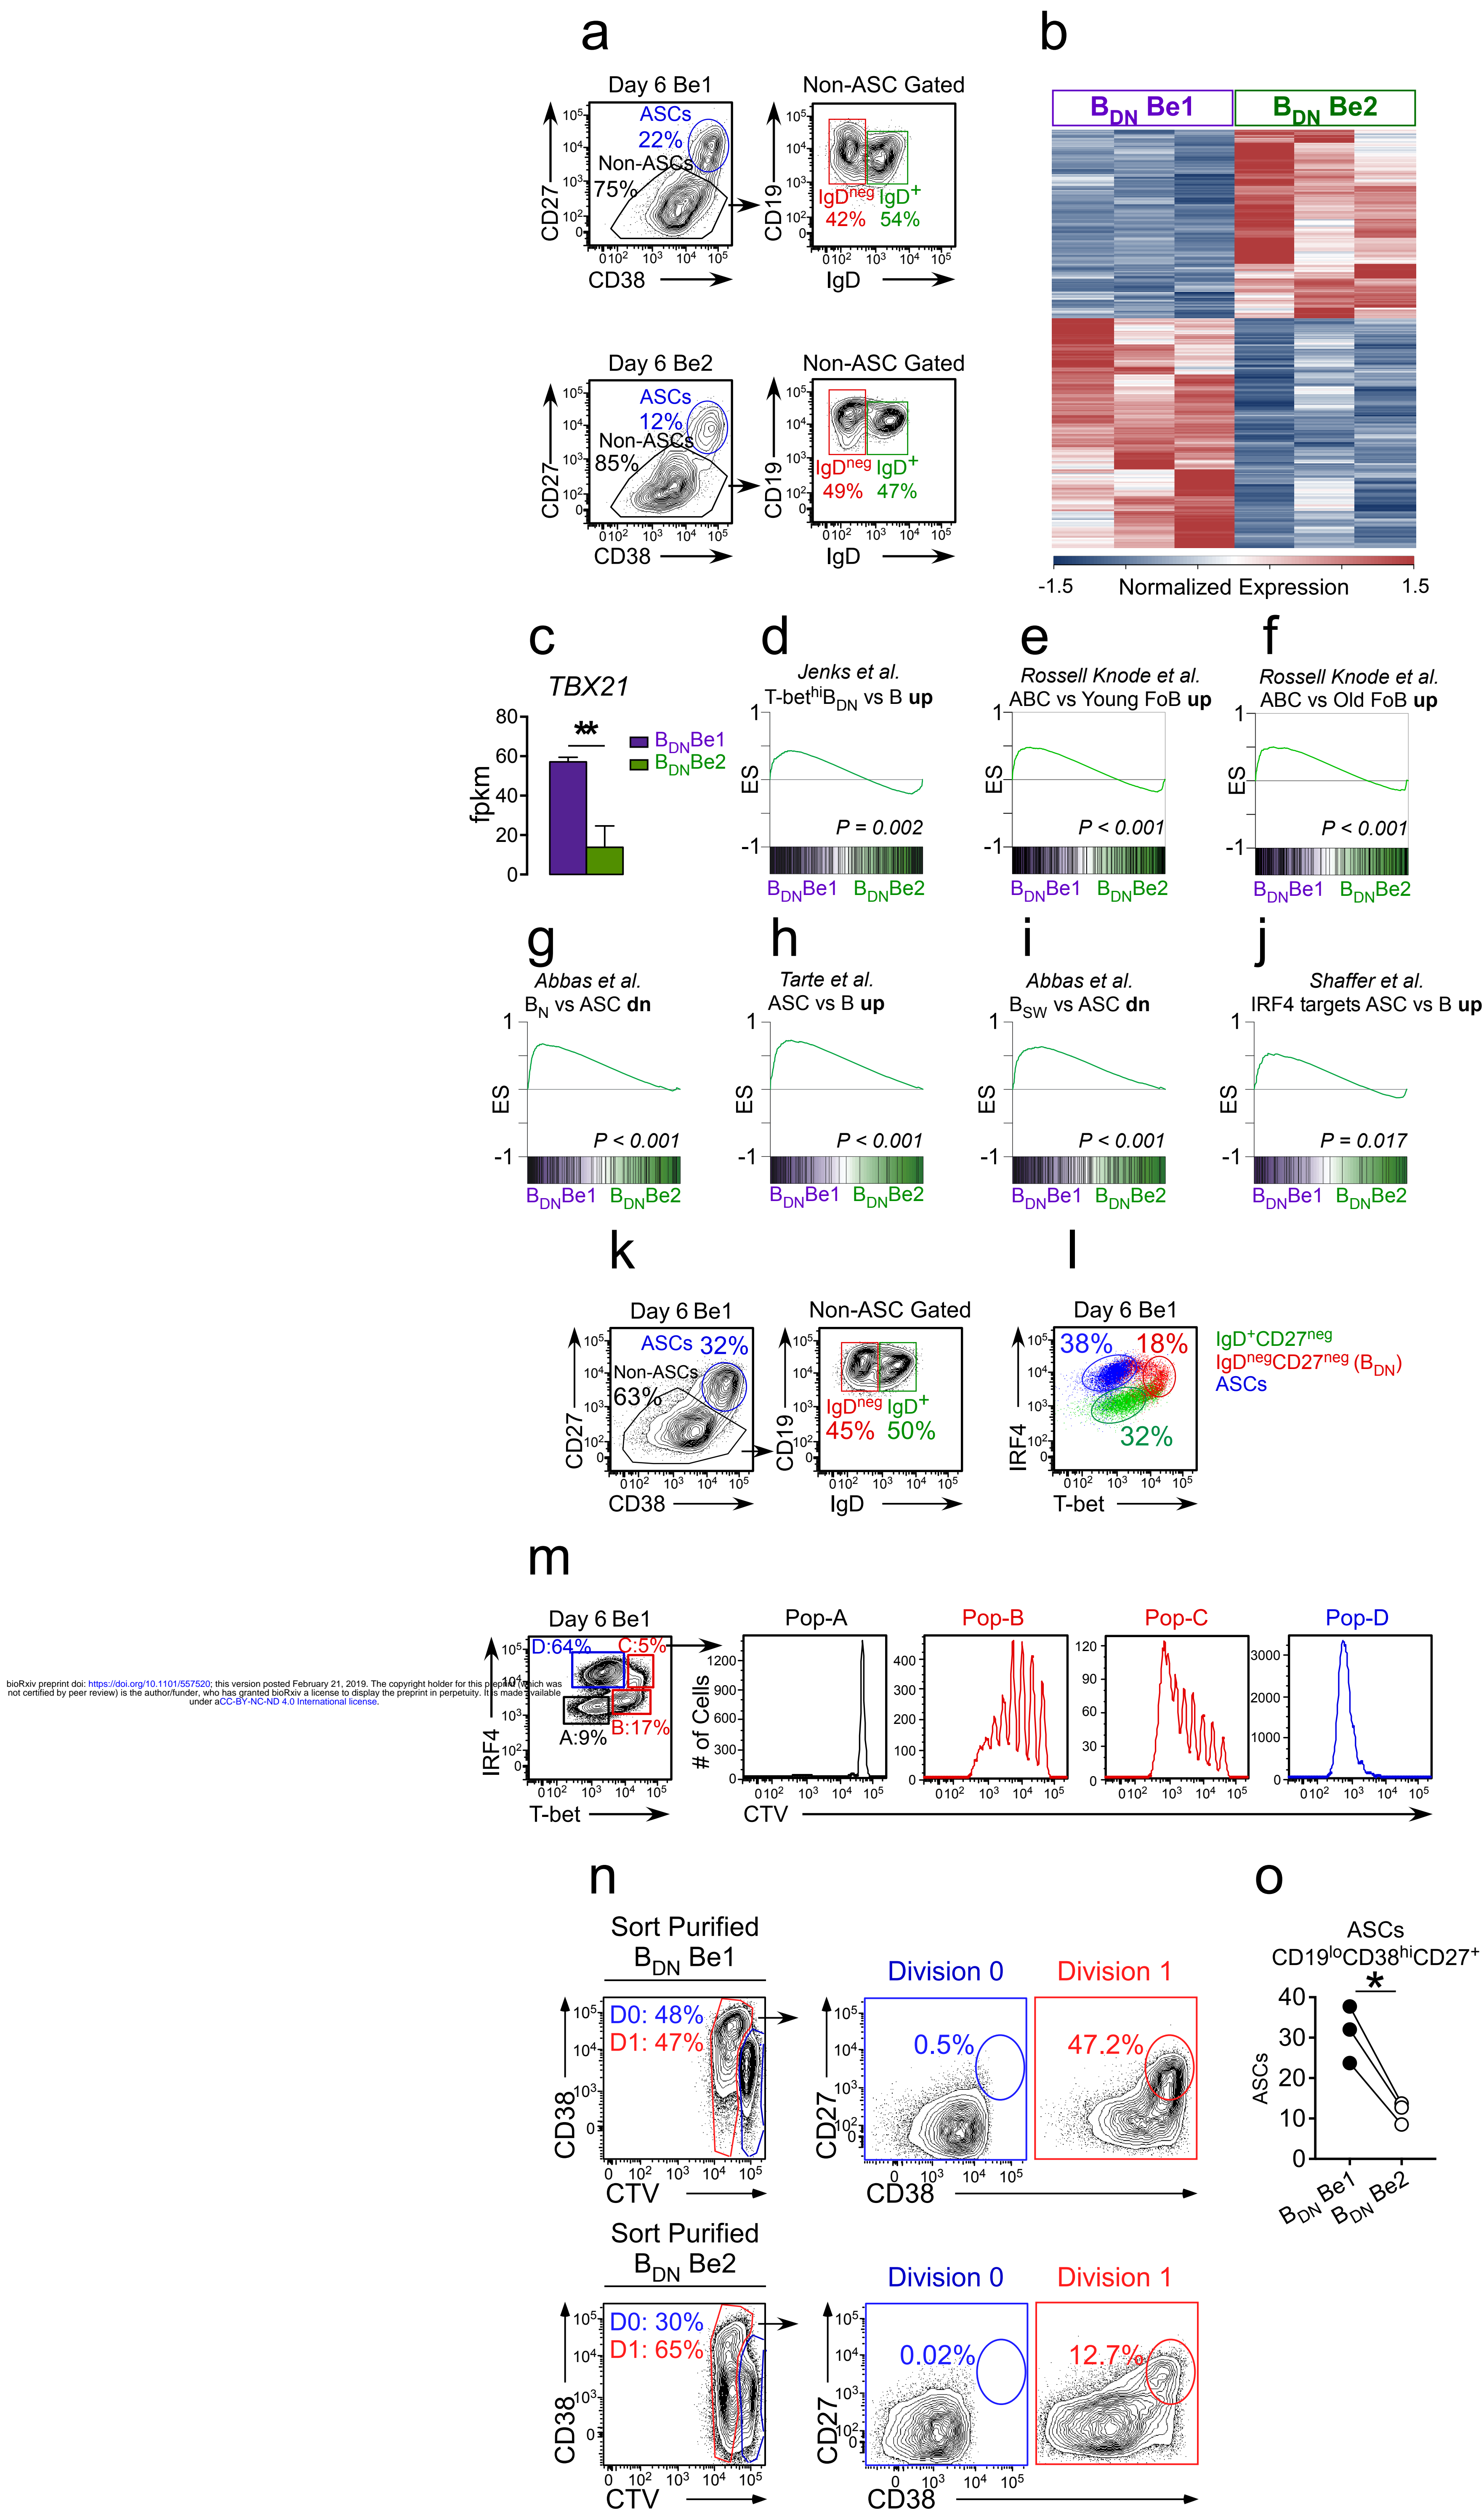

**Figure 5**

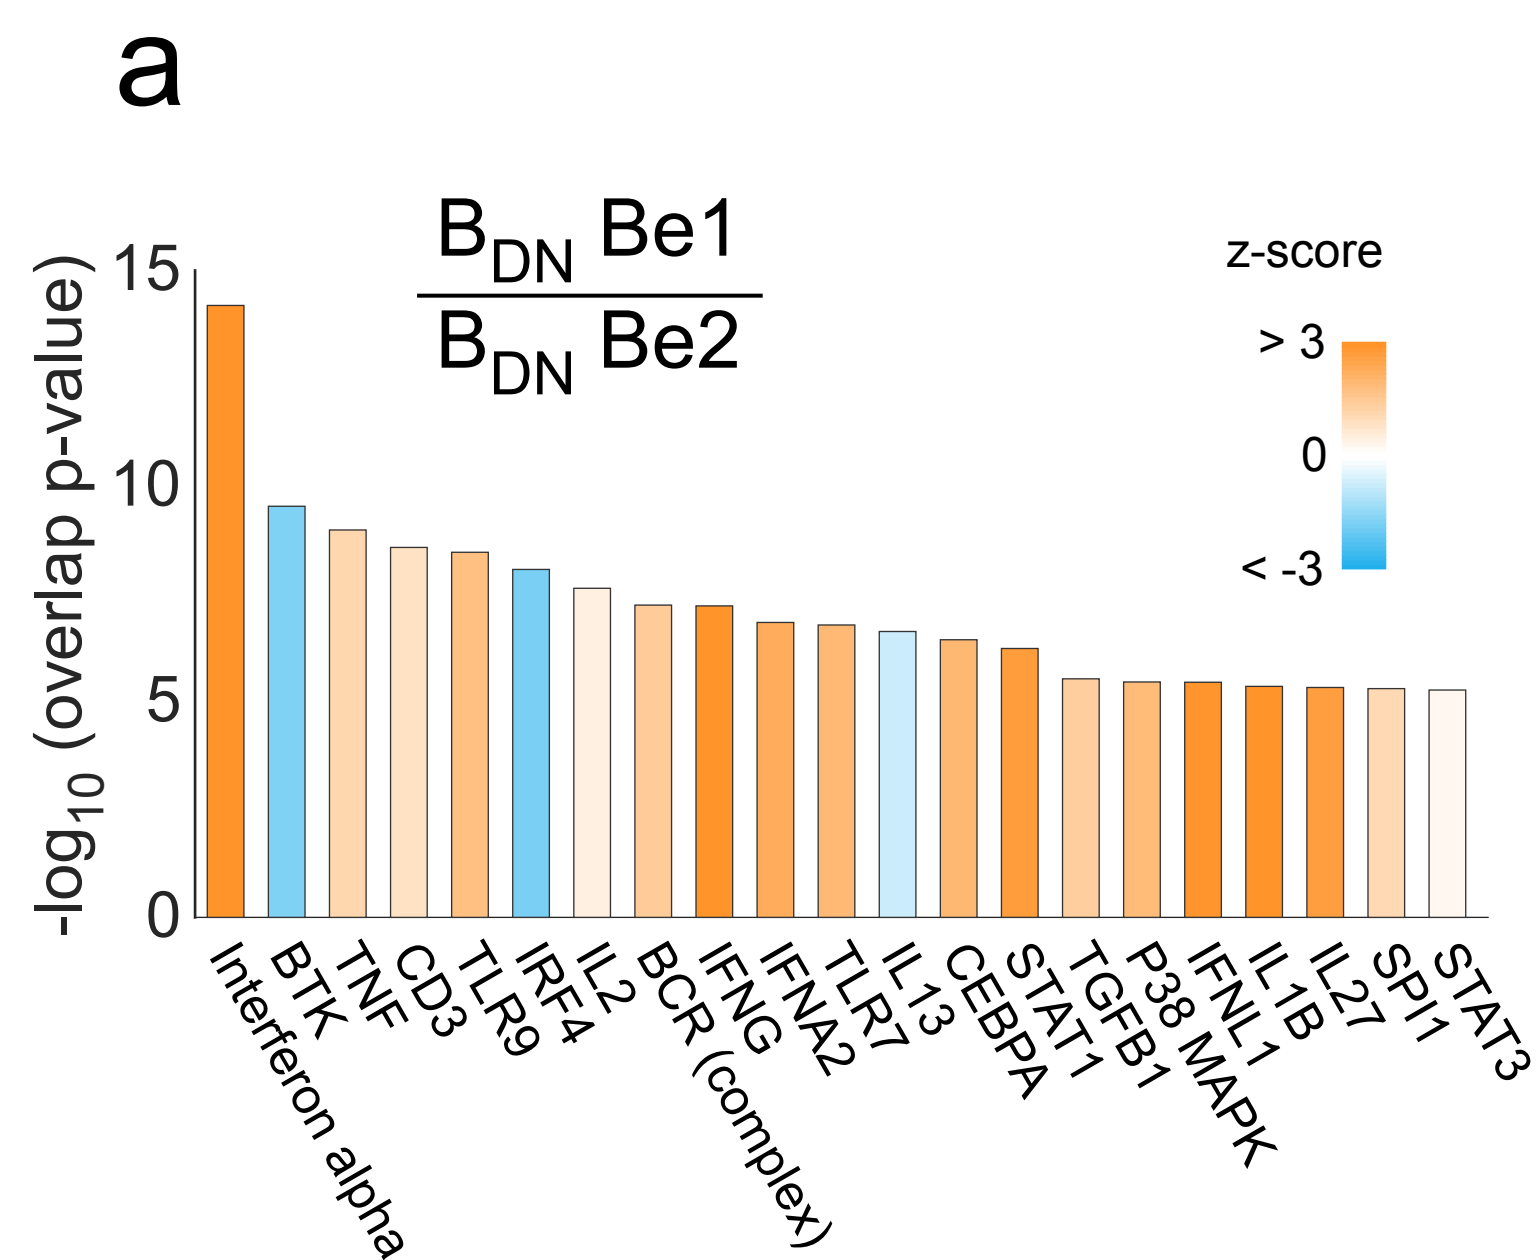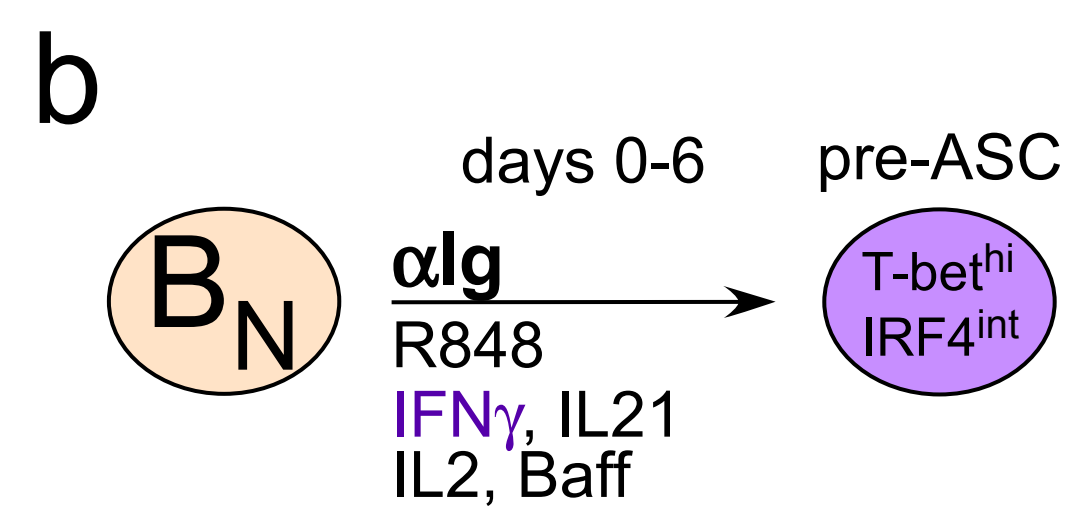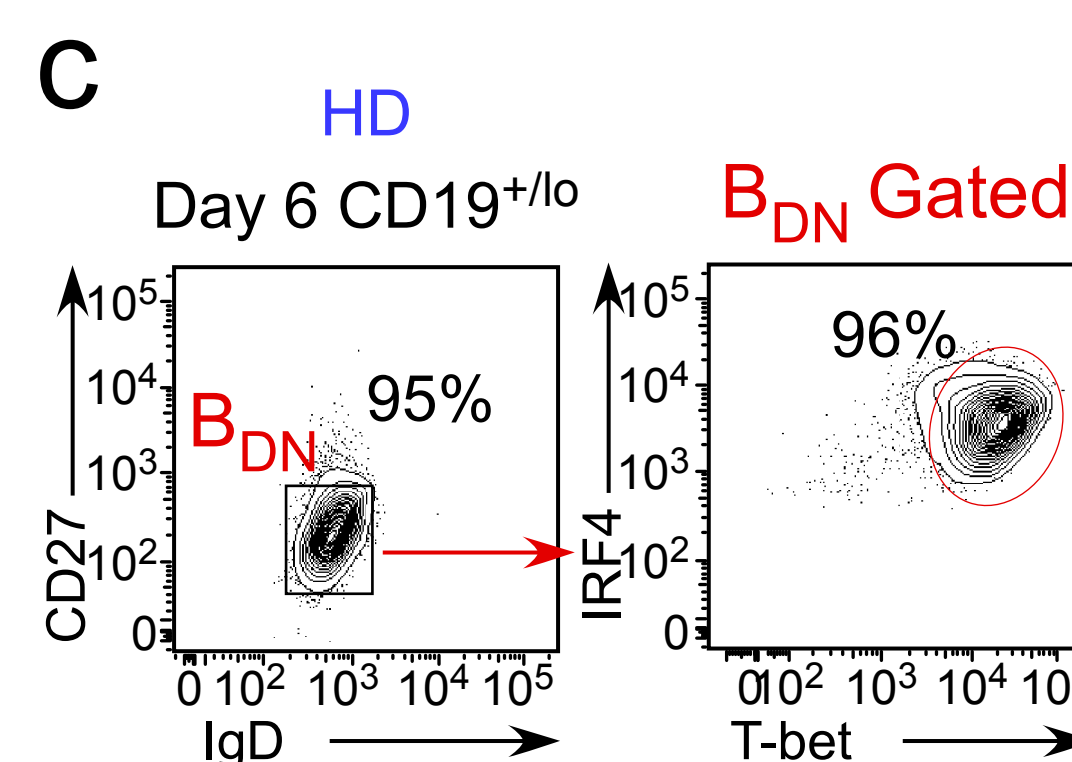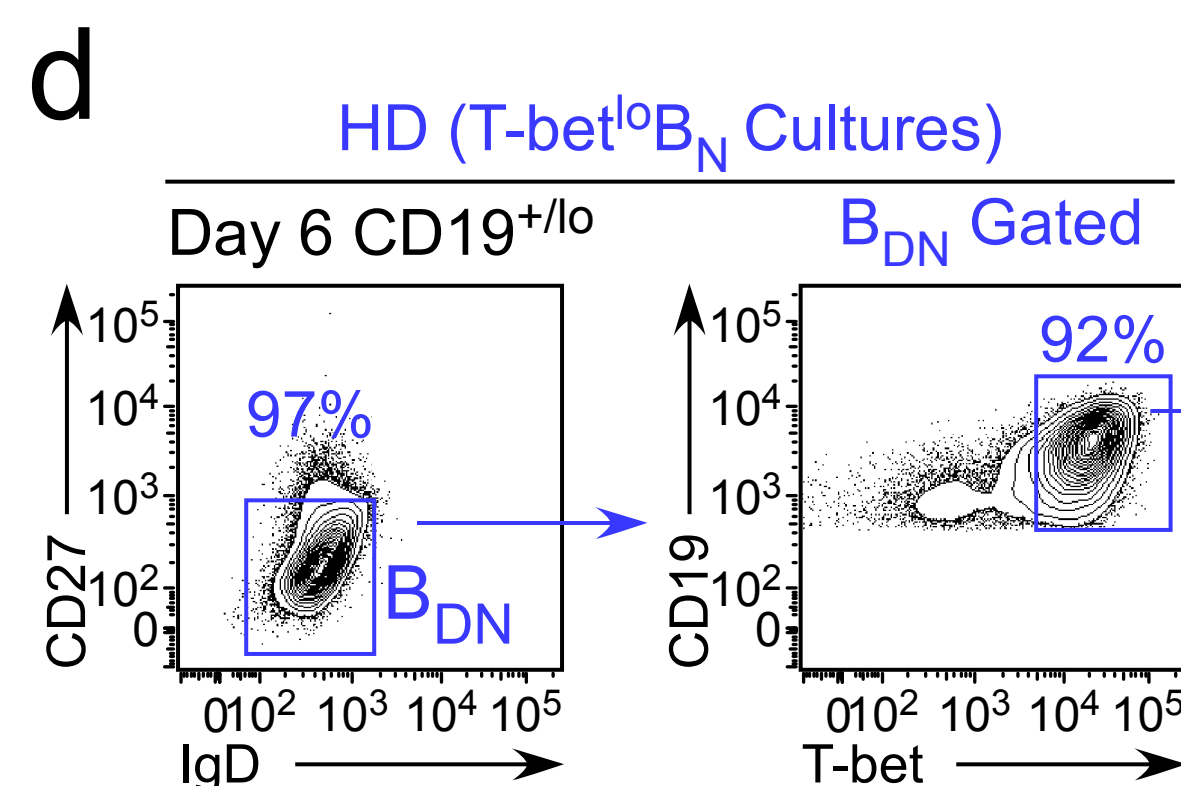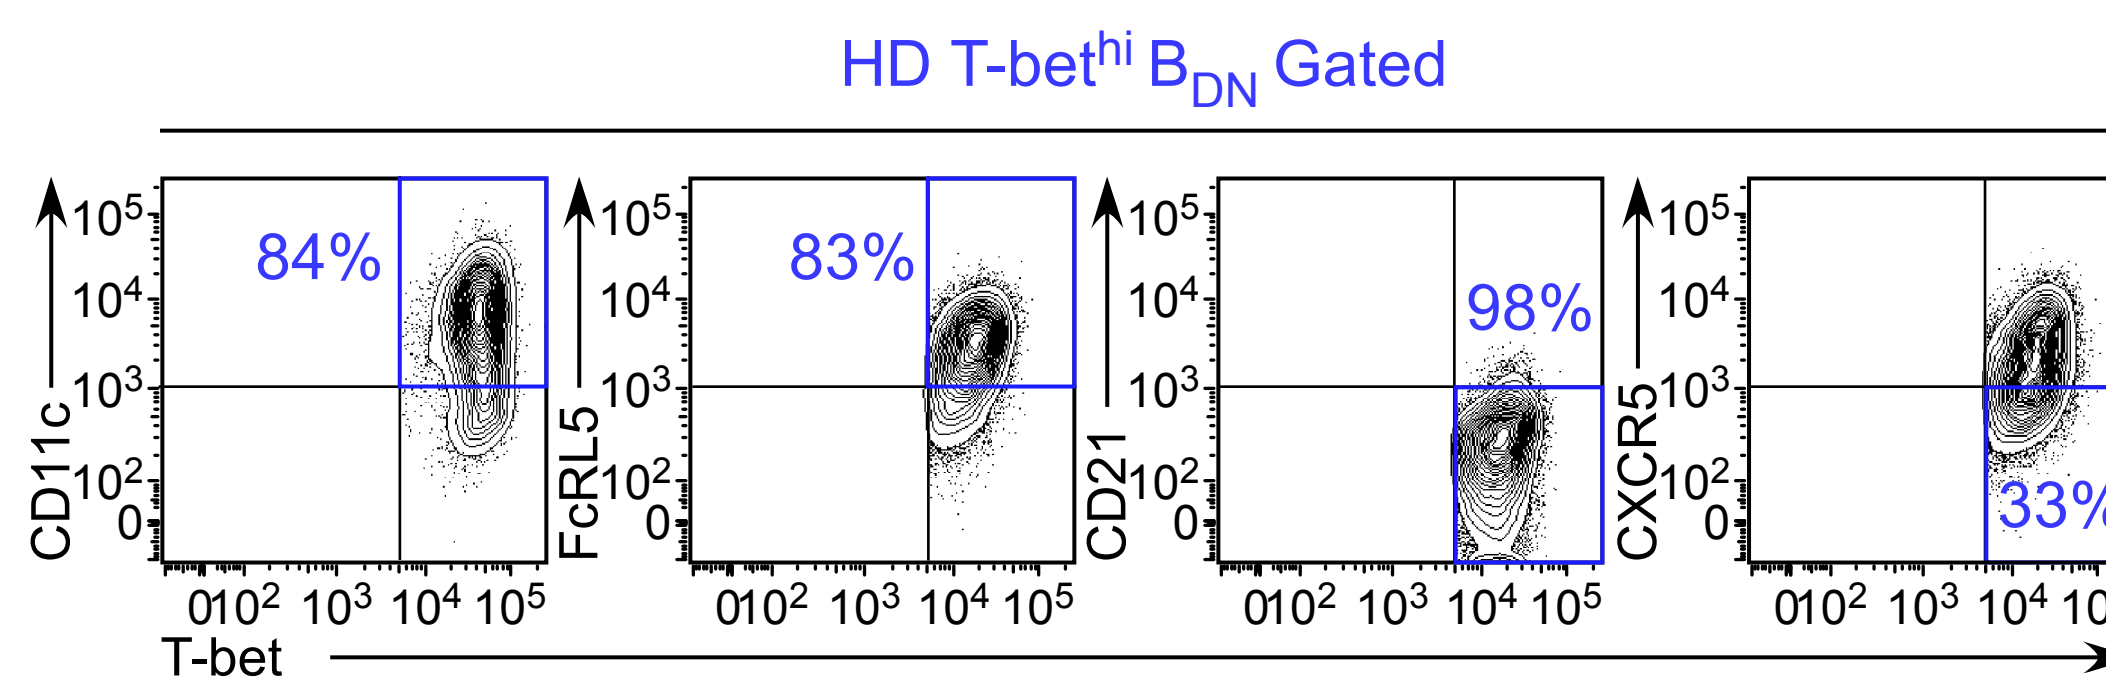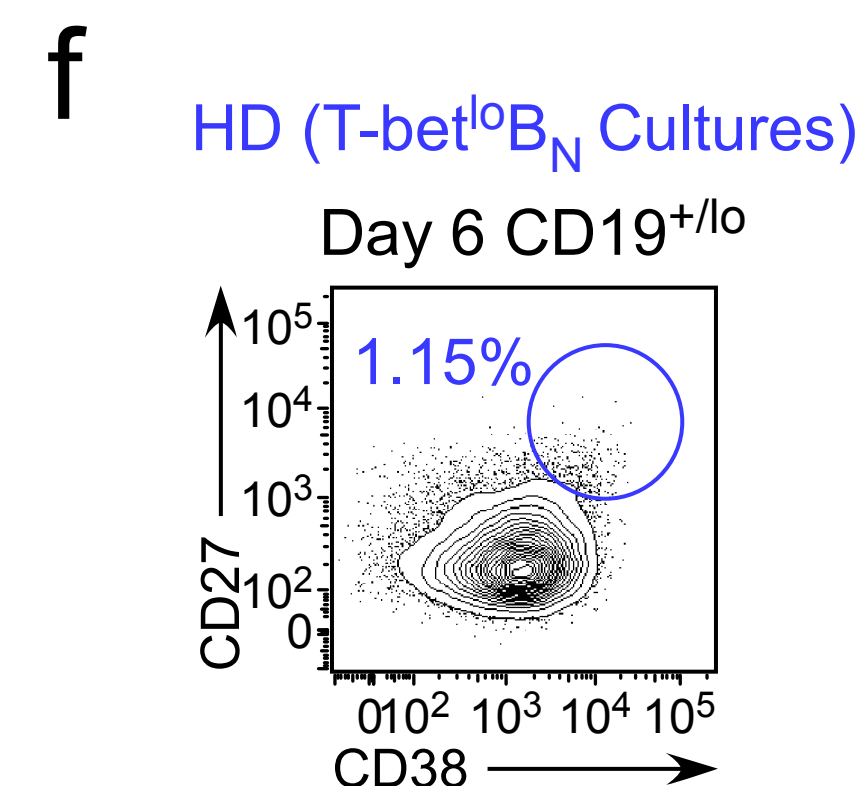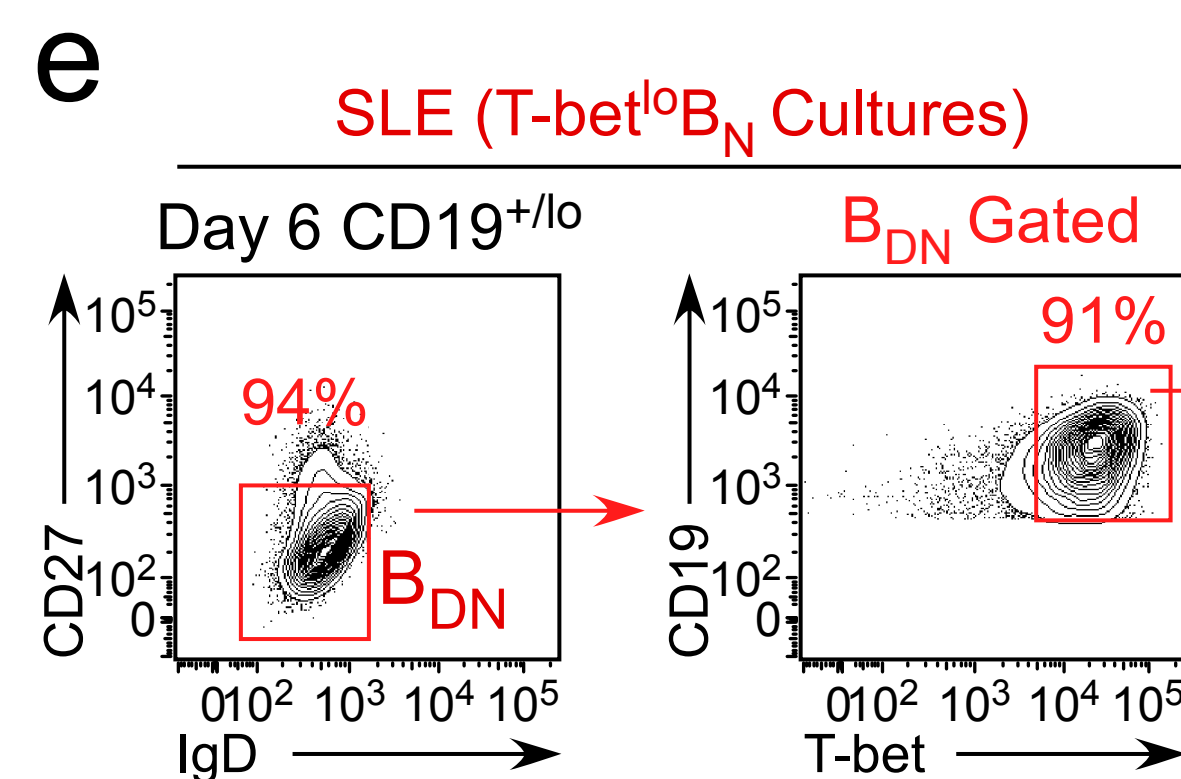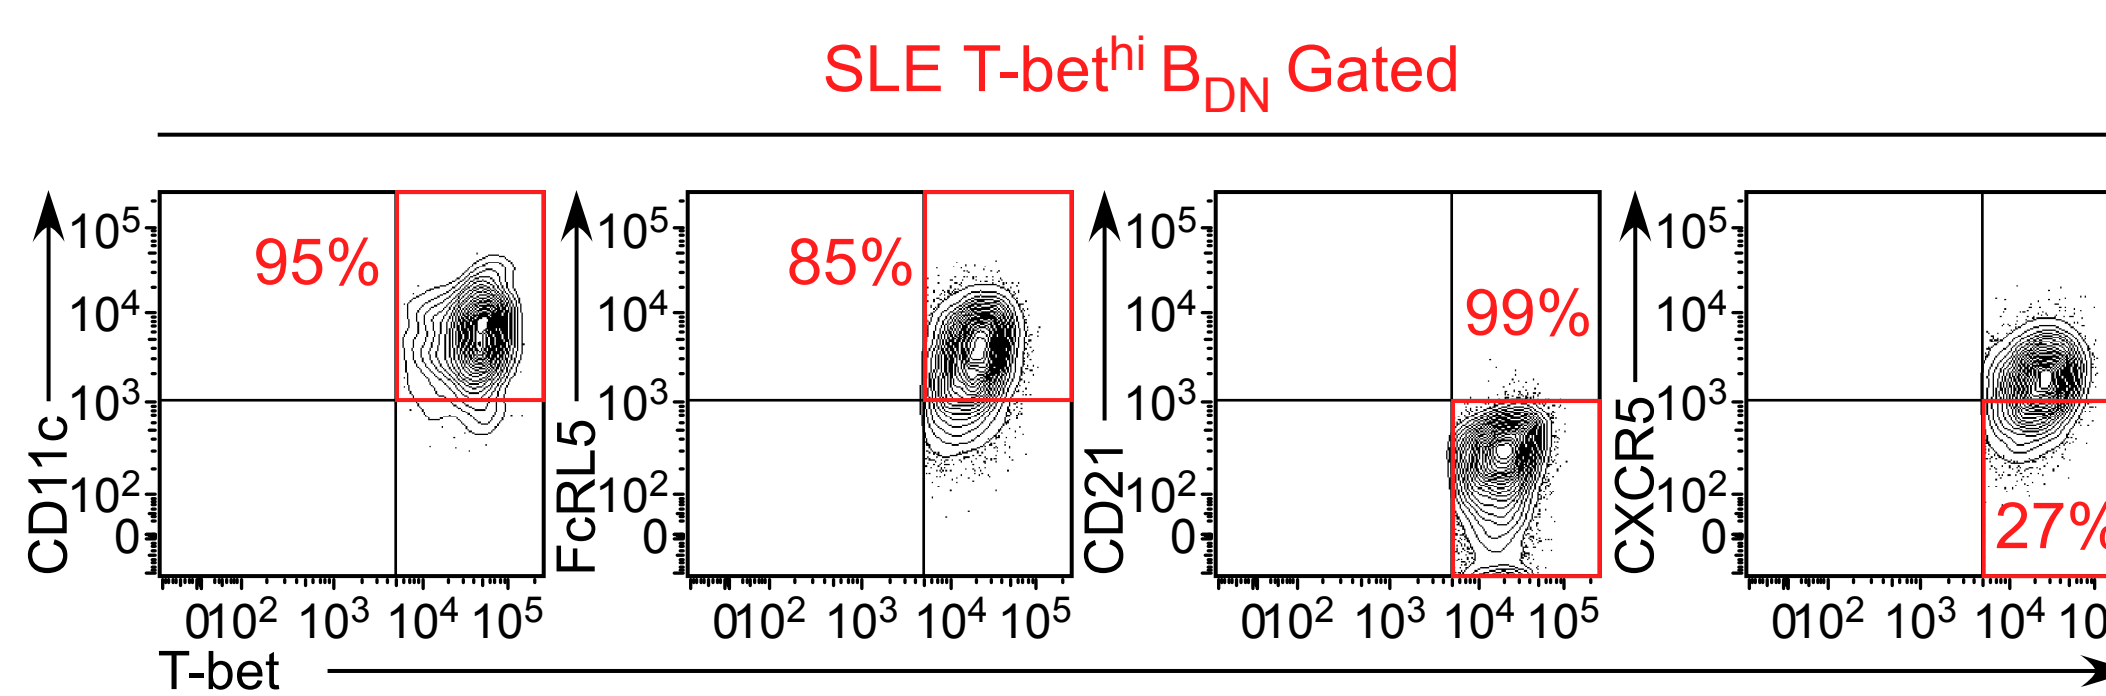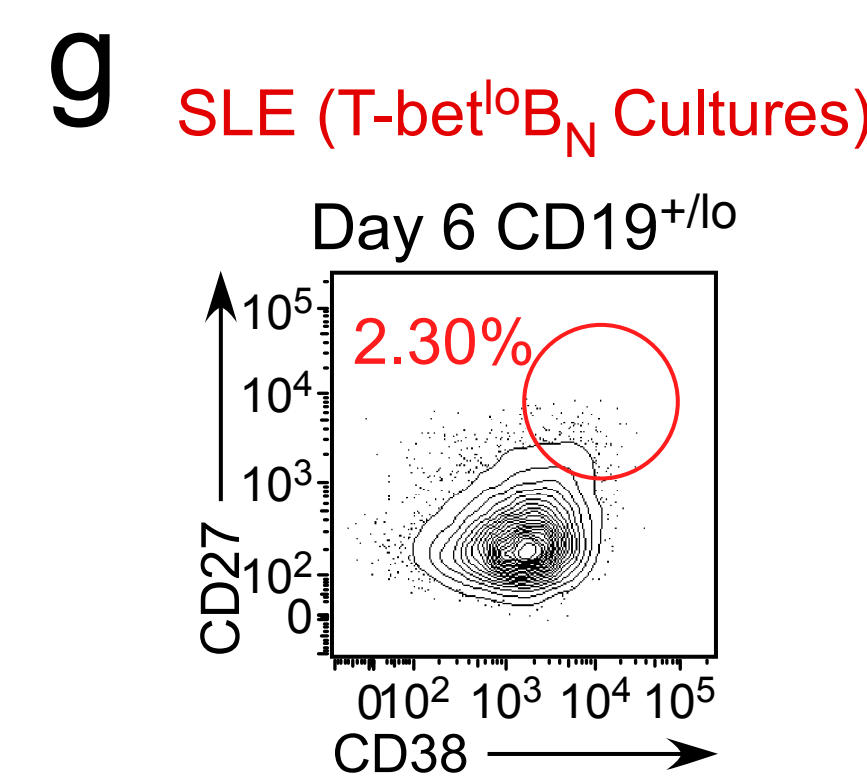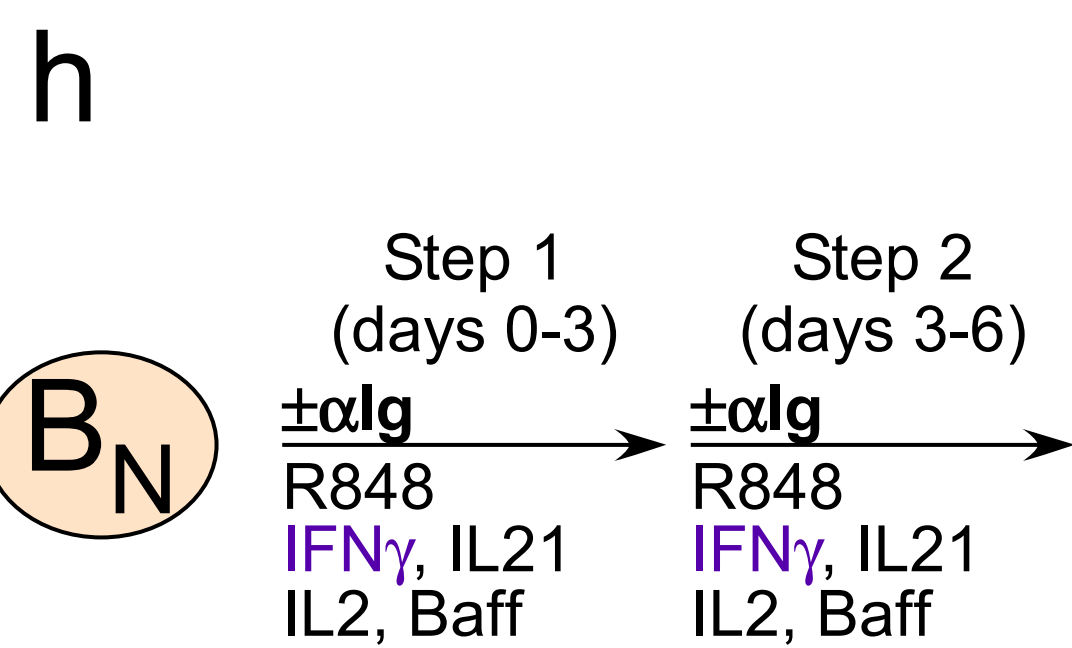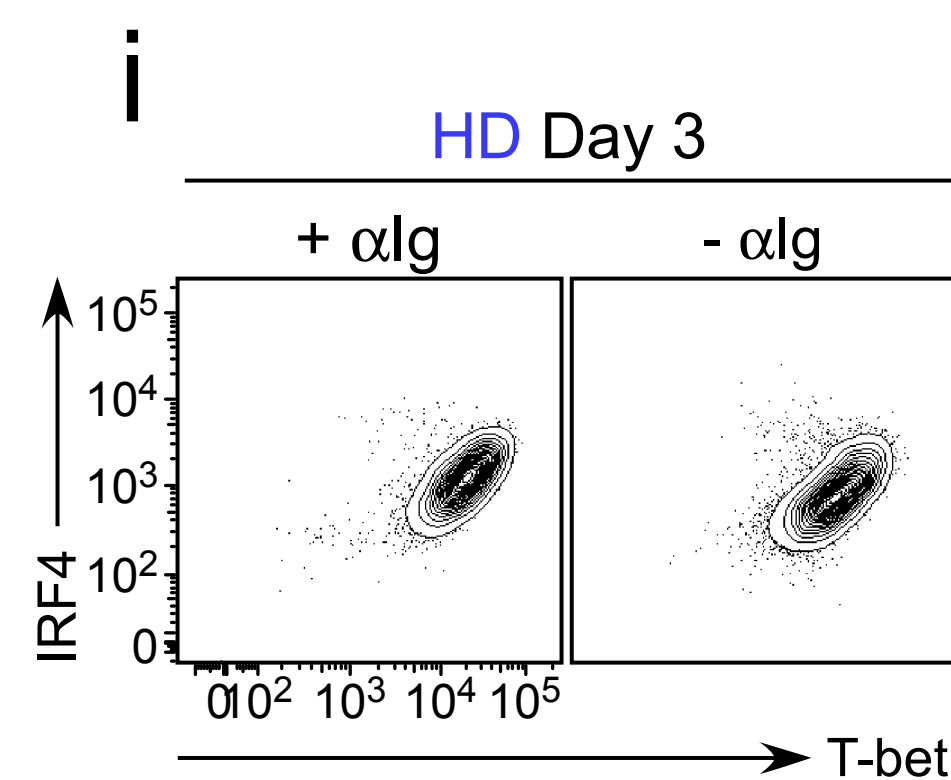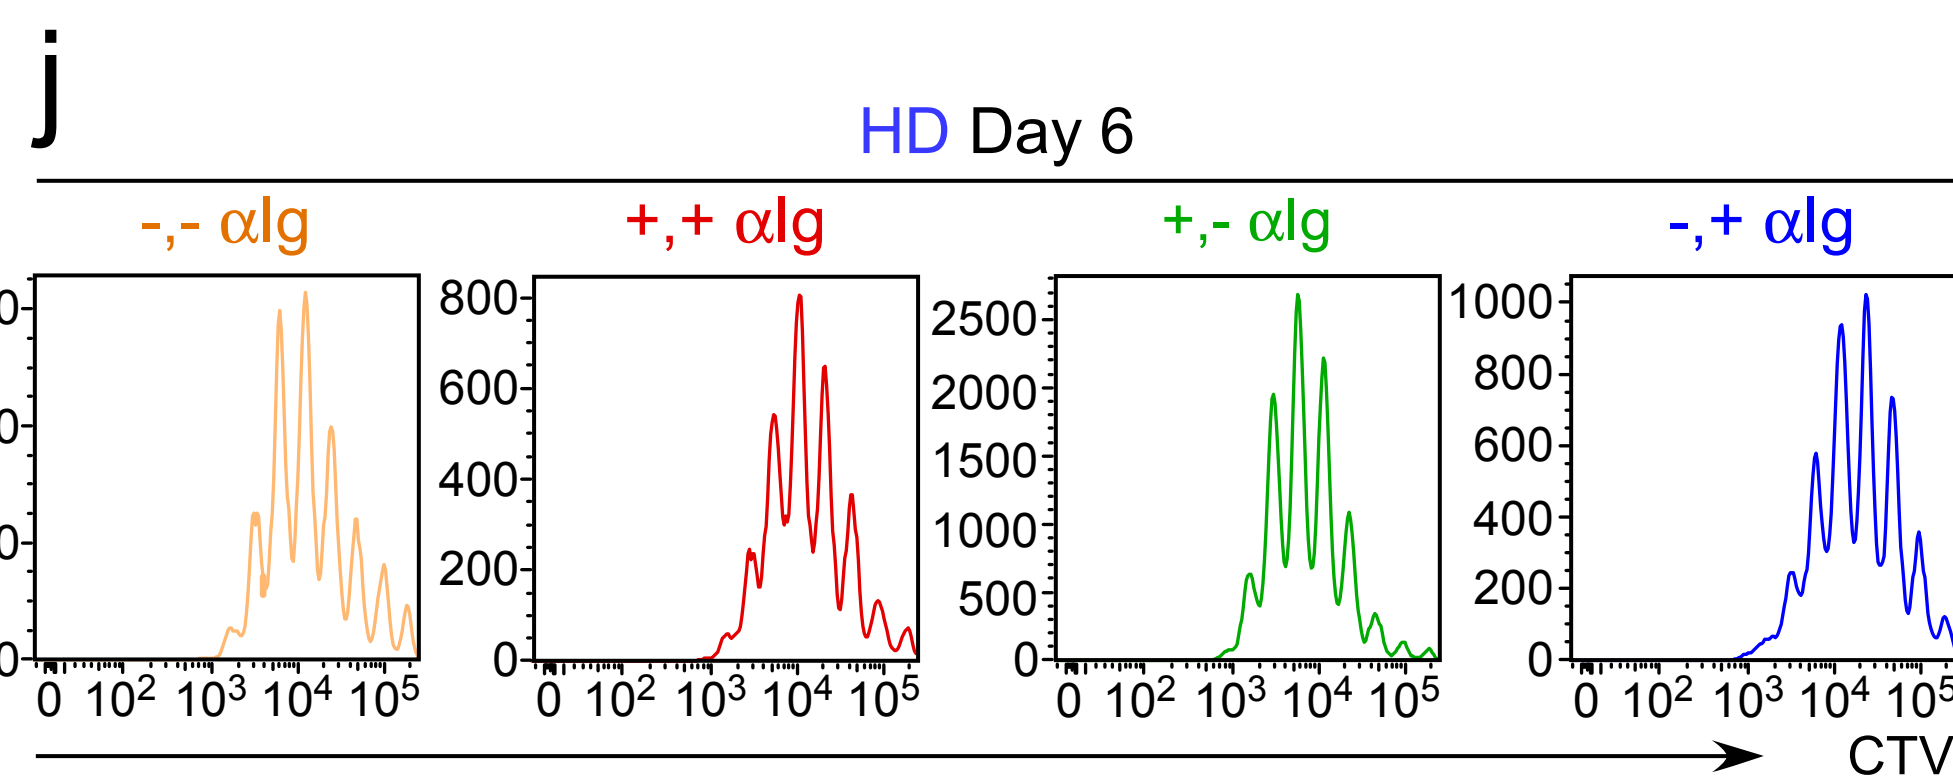

bioRxiv preprint doi: <https://doi.org/10.1101/557520>; this version posted February 21, 2019. The copyright holder for this preprint (which was not certified by peer review) is the author/funder, who has granted bioRxiv a license to display the preprint in perpetuity. It is made available under aCC-BY-NC-ND 4.0 International license.

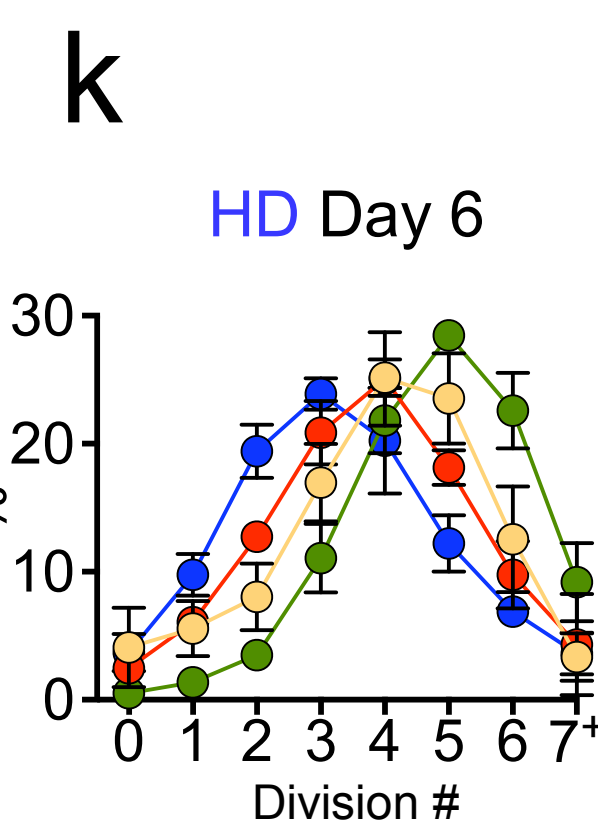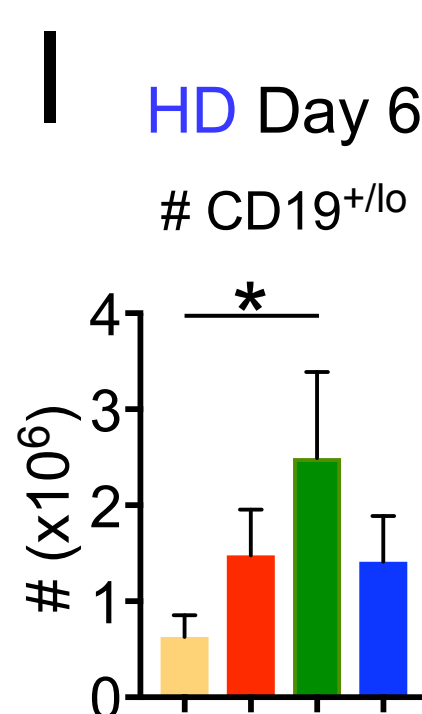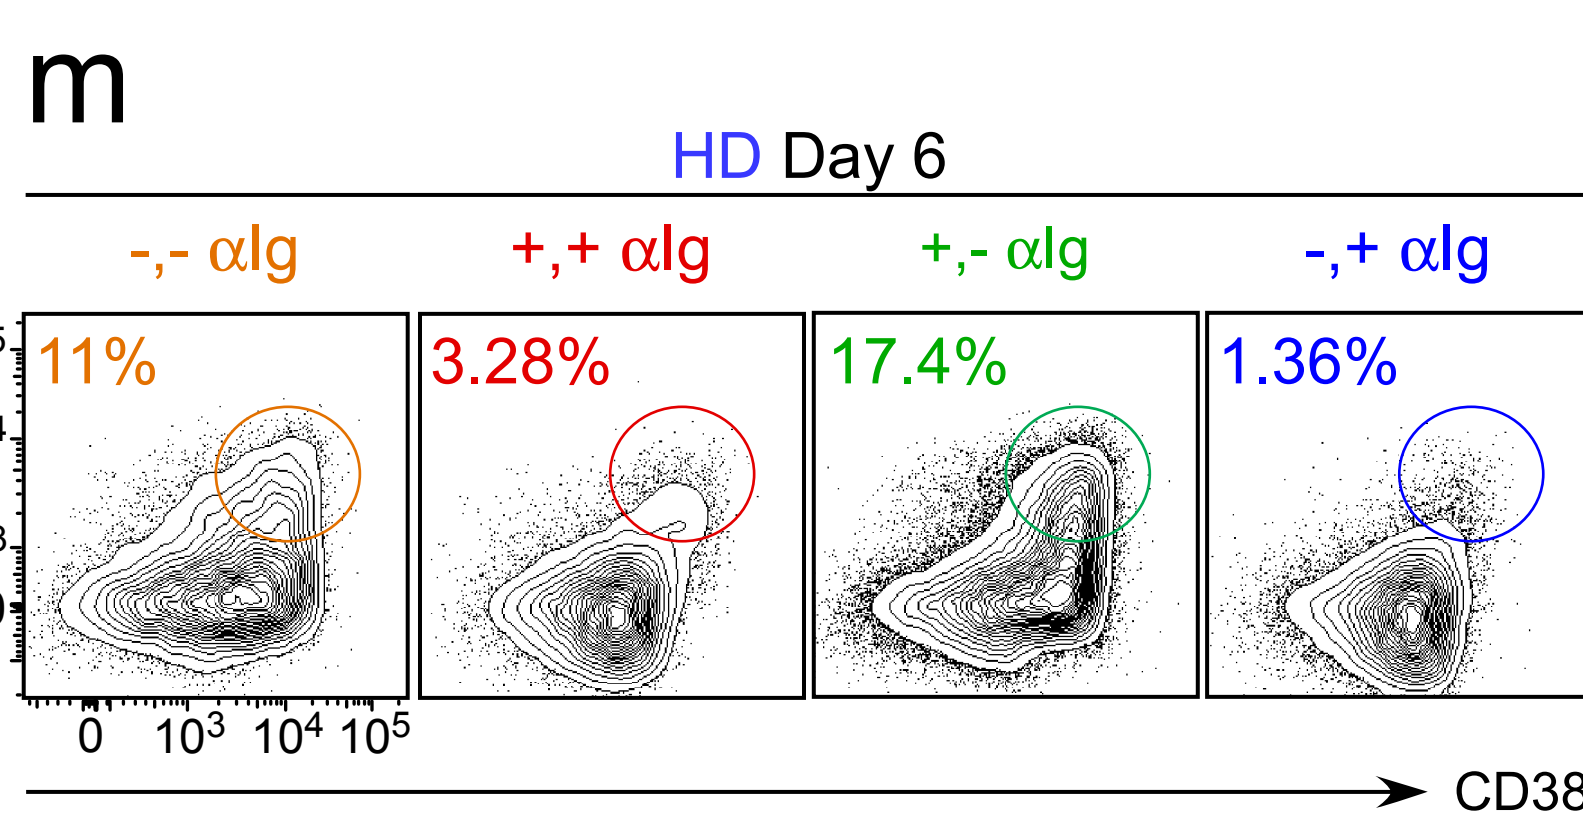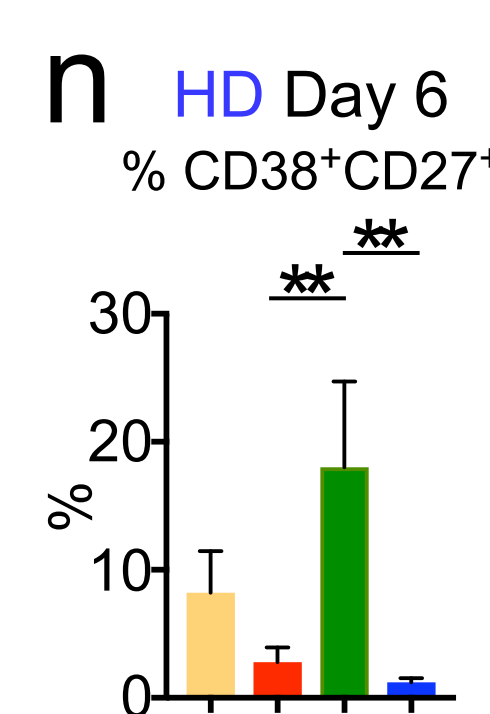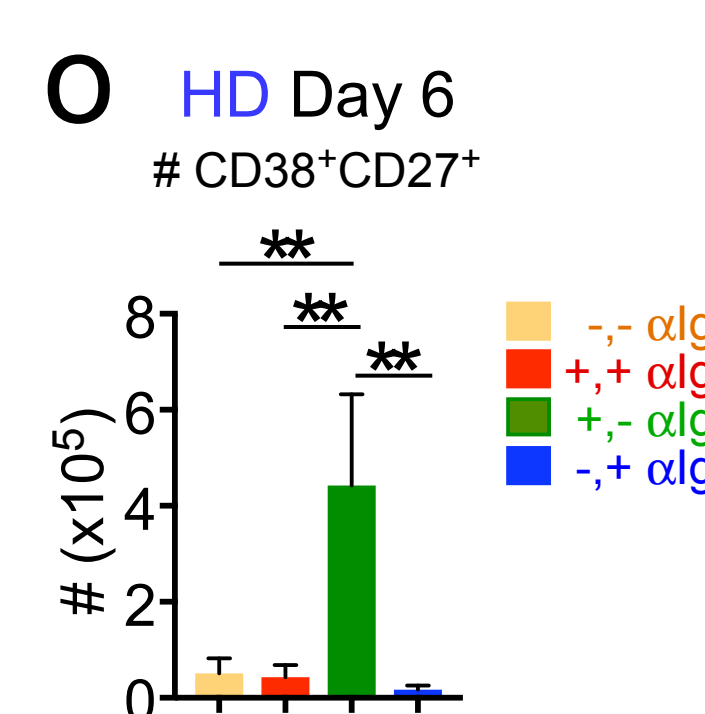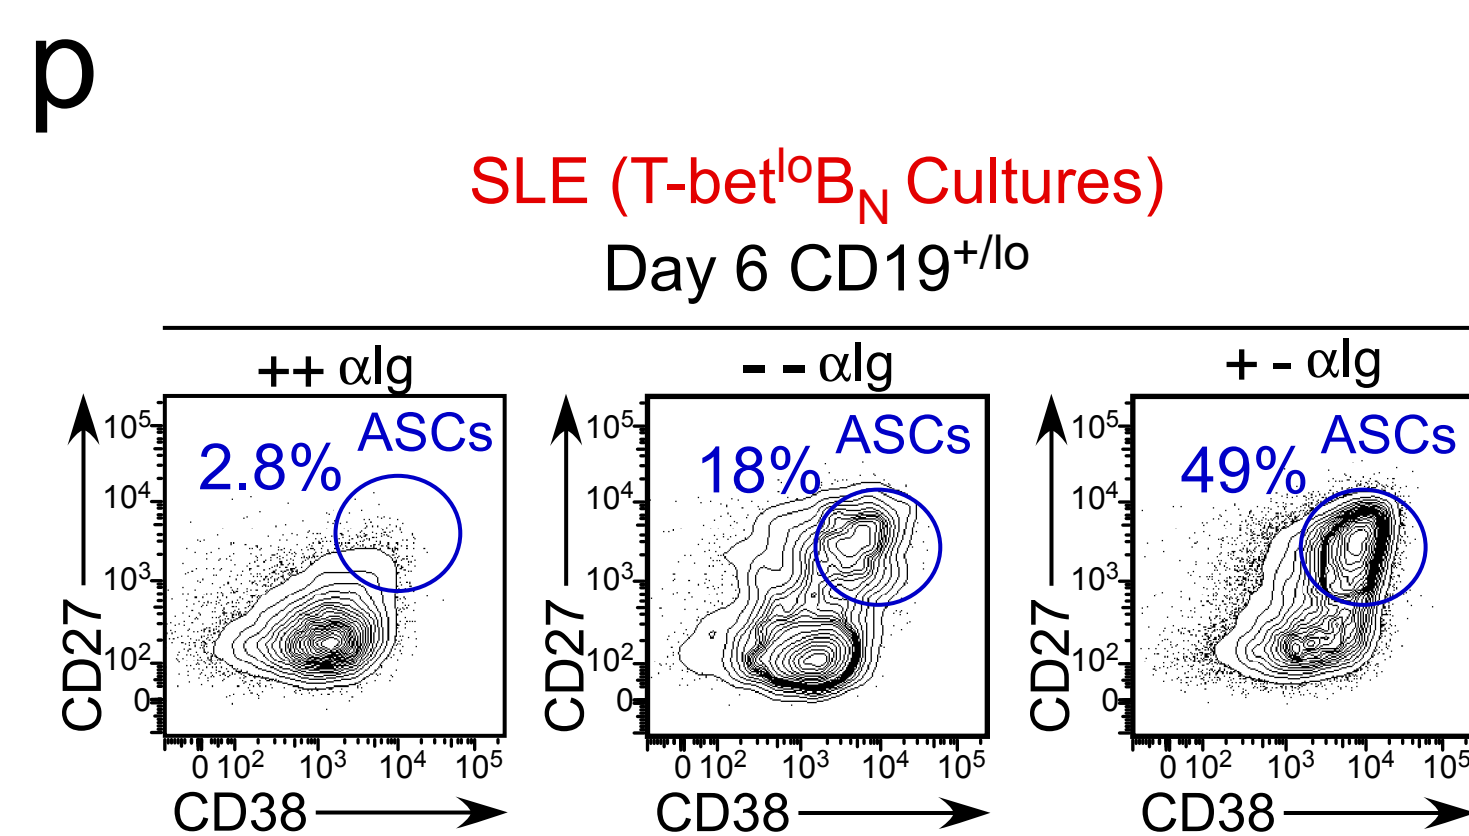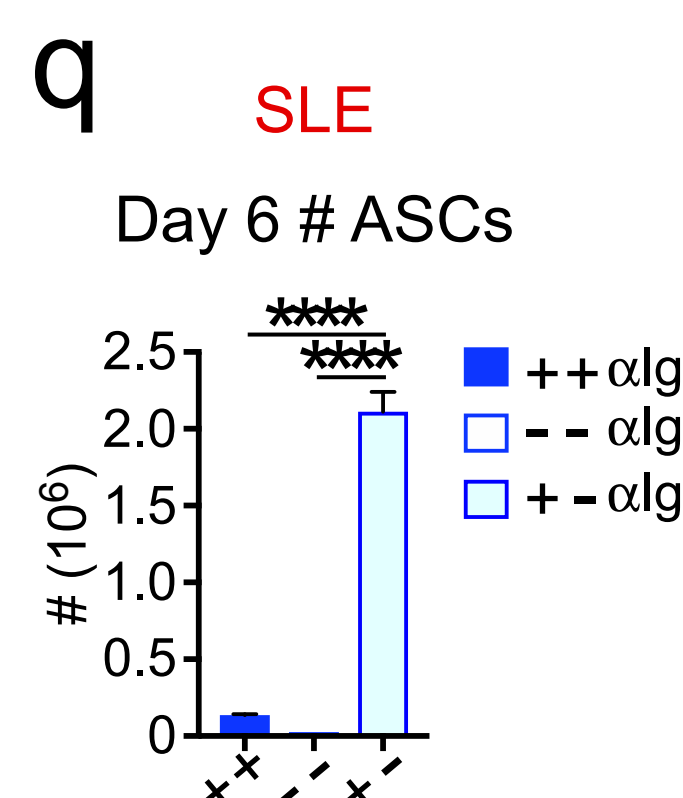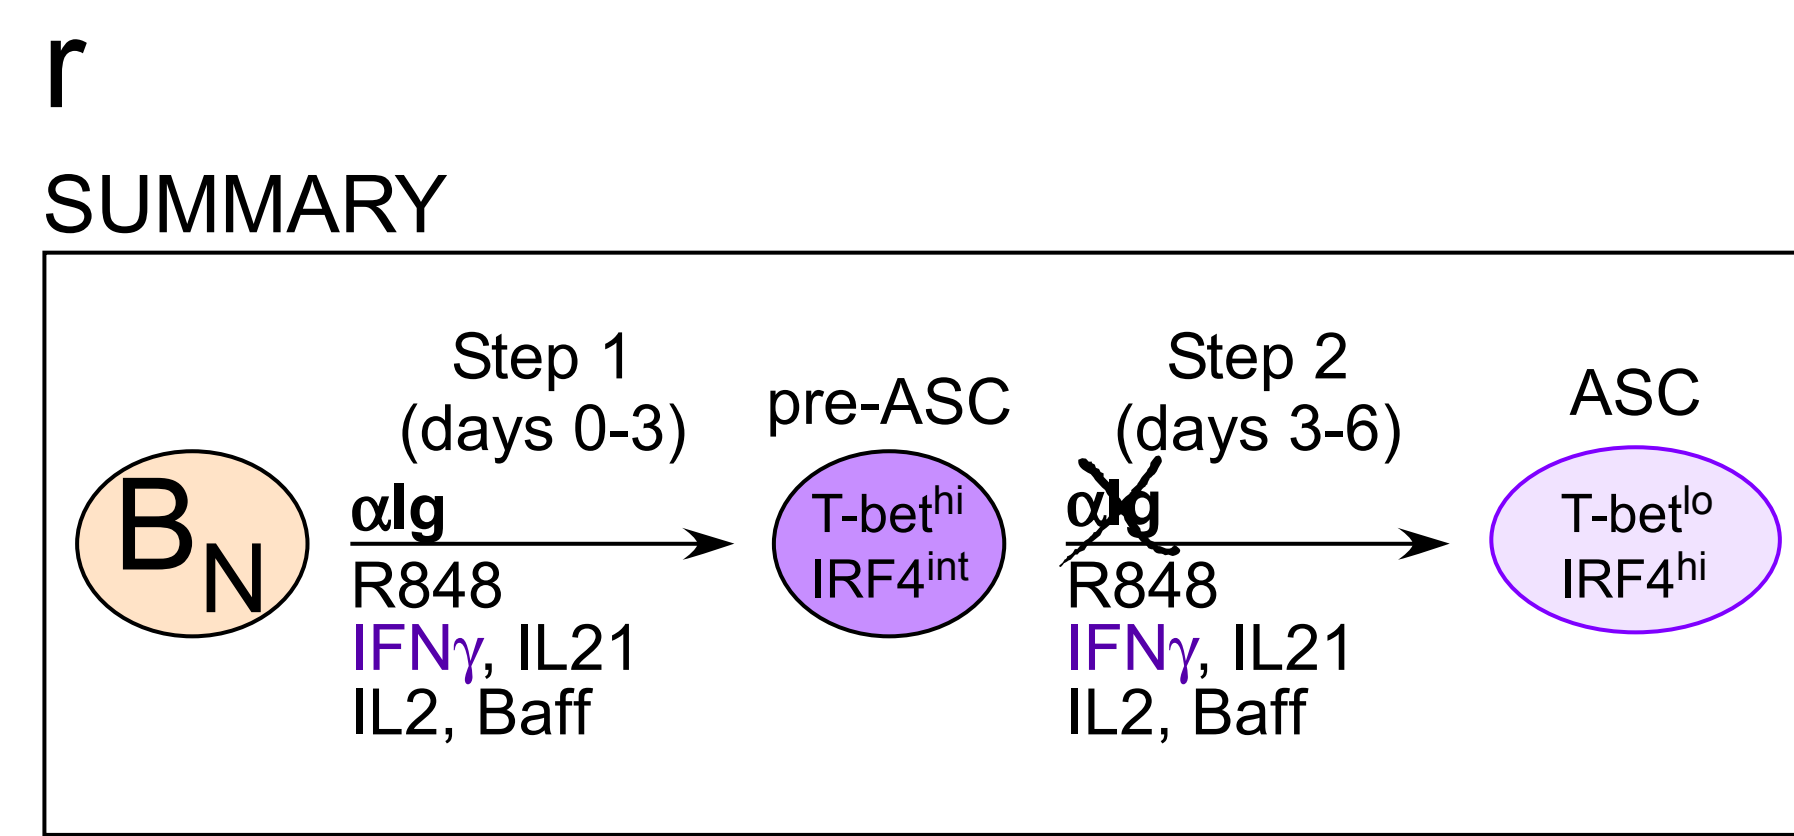



**Figure 6**

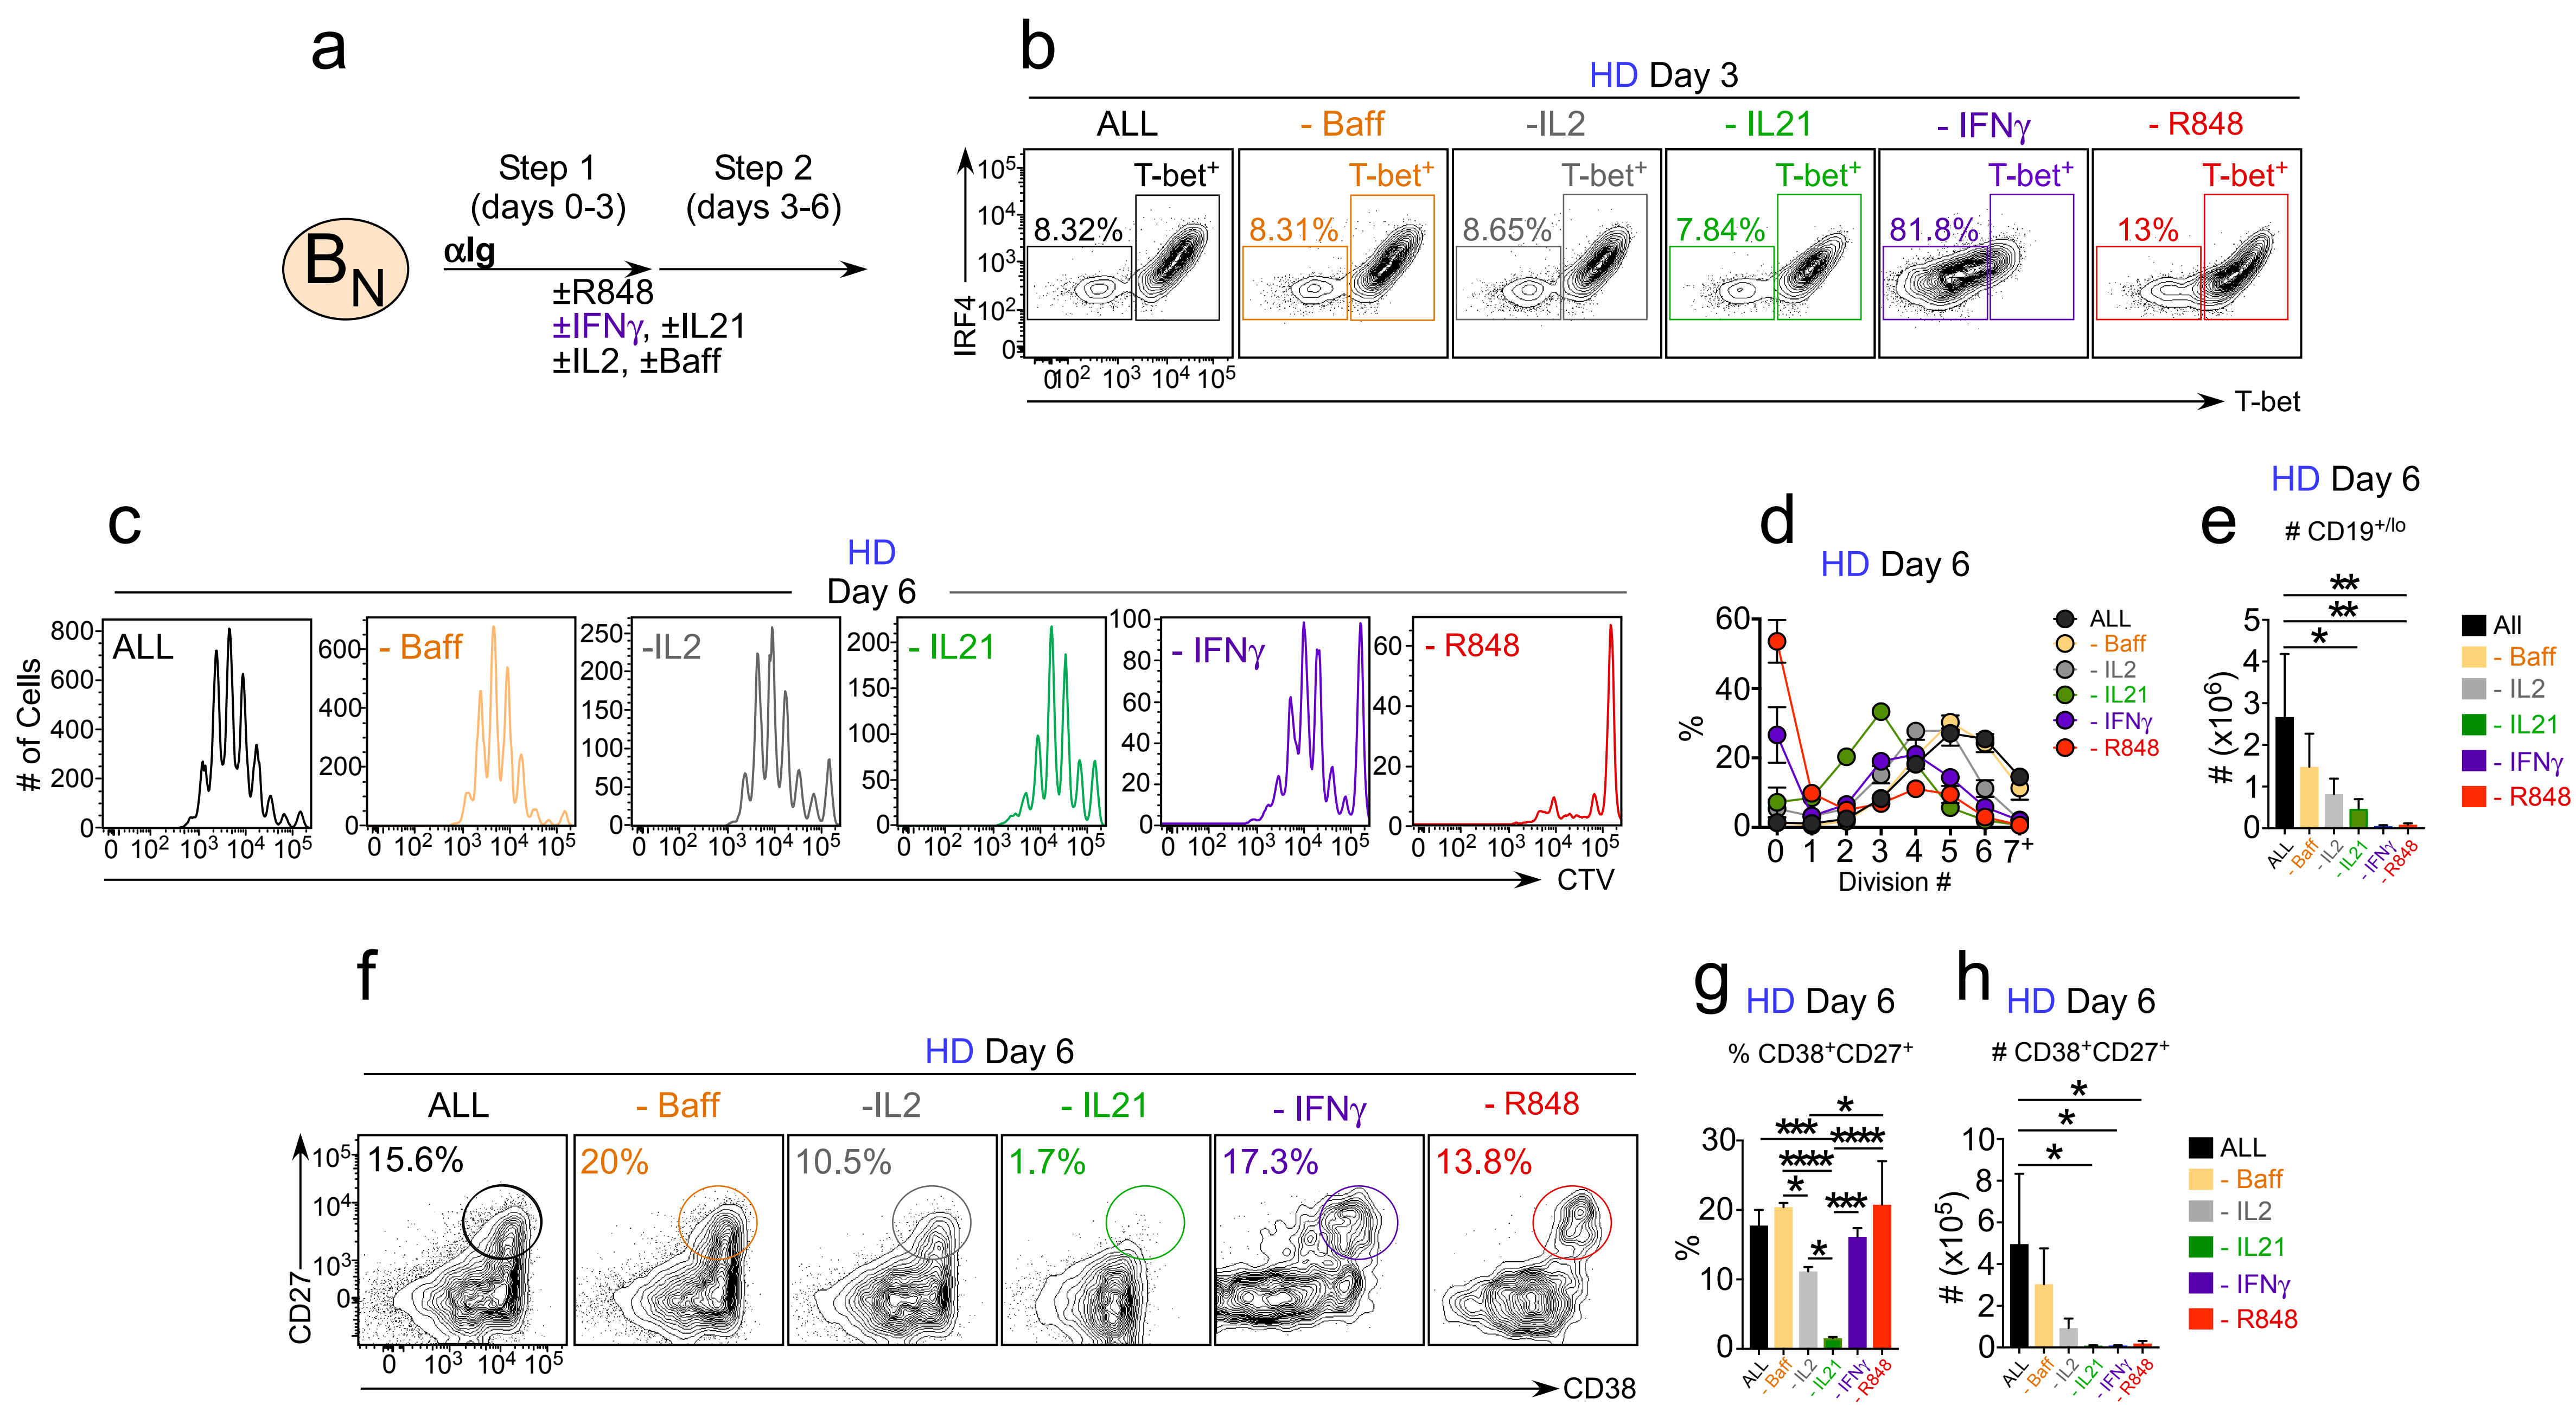

bioRxiv preprint doi: <https://doi.org/10.1101/557520>; this version posted February 21, 2019. The copyright holder for this preprint (which was not certified by peer review) is the author/funder, who has granted bioRxiv a license to display the preprint in perpetuity. It is made available under aCC-BY-NC-ND 4.0 International license.

**i**

**SUMMARY**

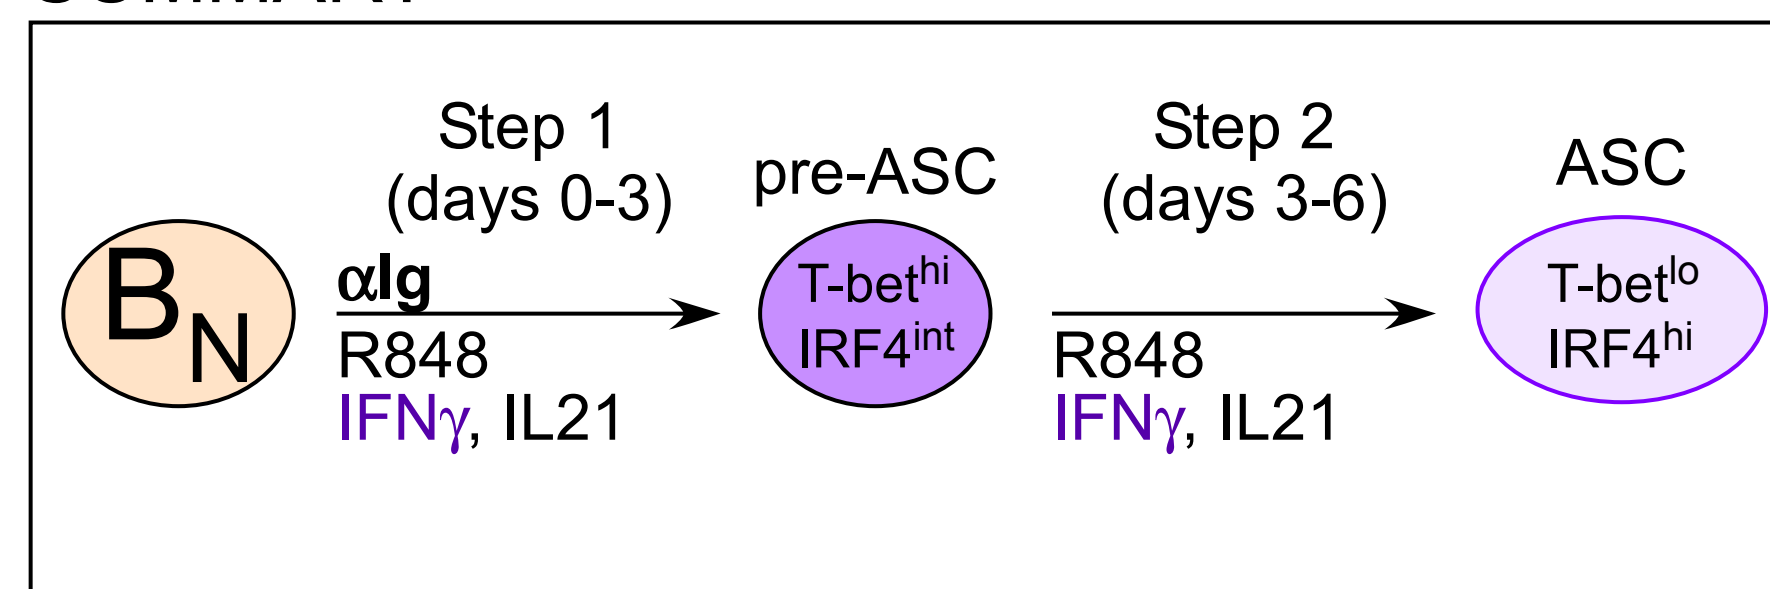

**Figure 7**

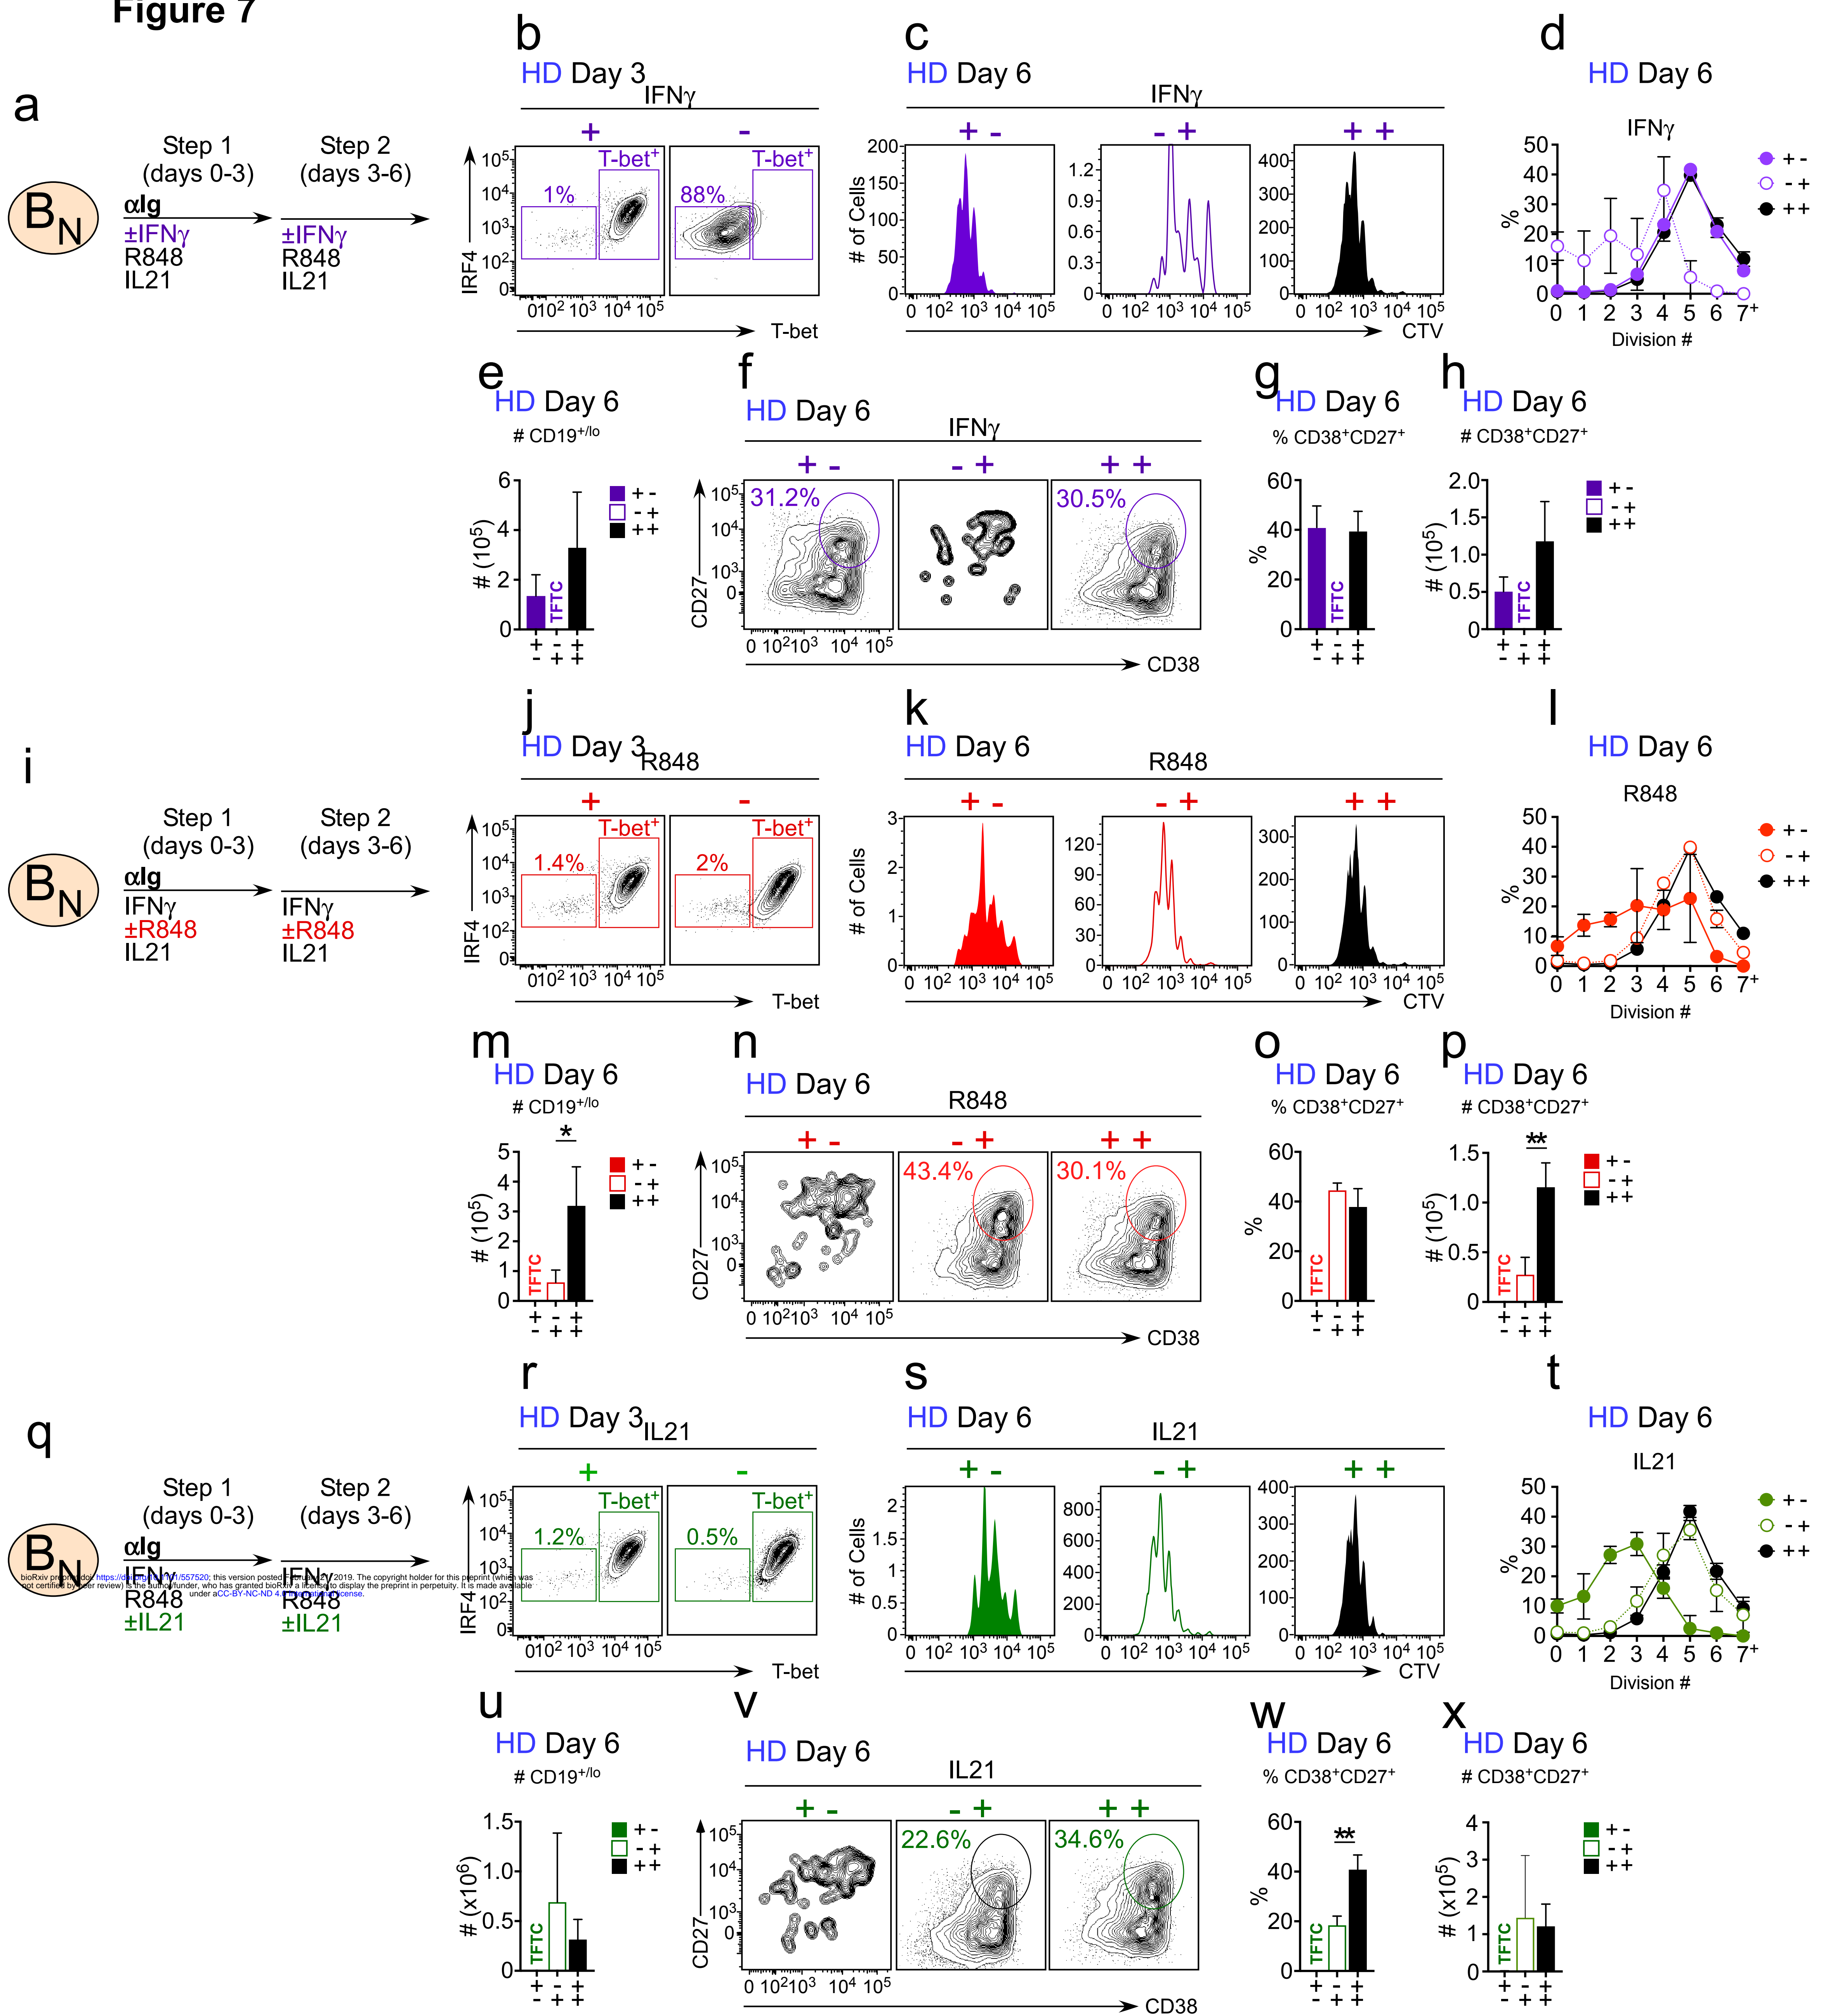

**y**  
SUMMARY

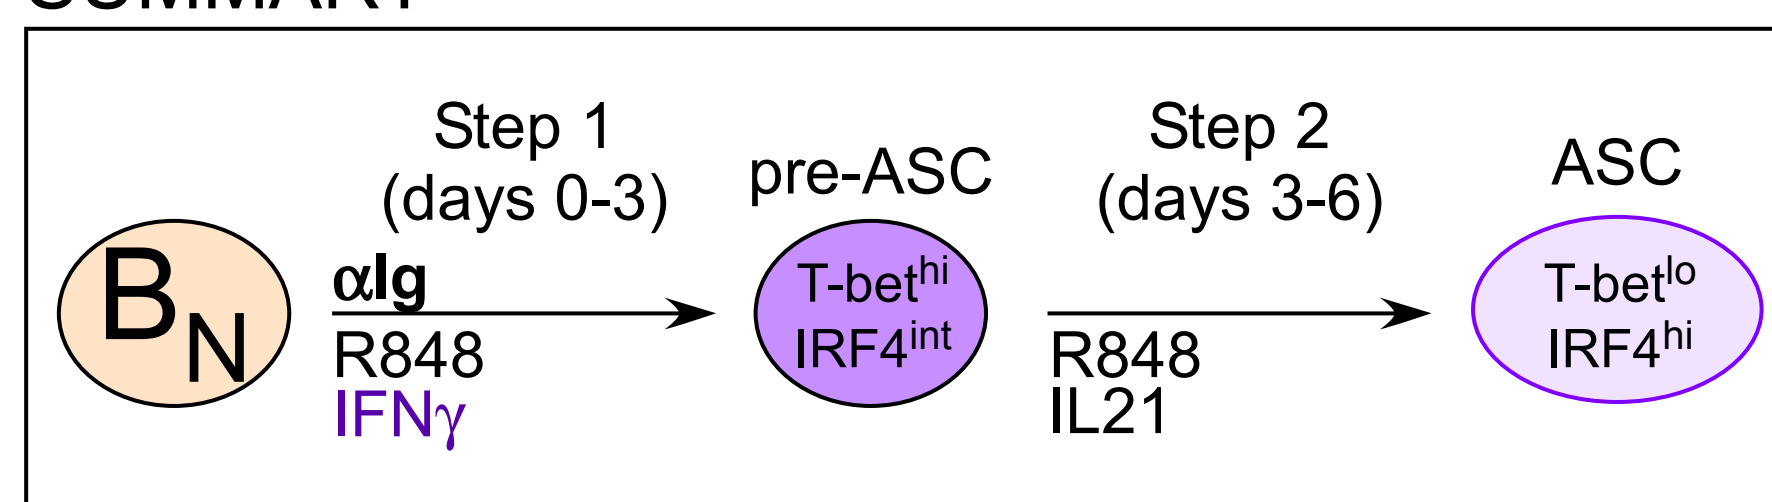

**Figure 8**

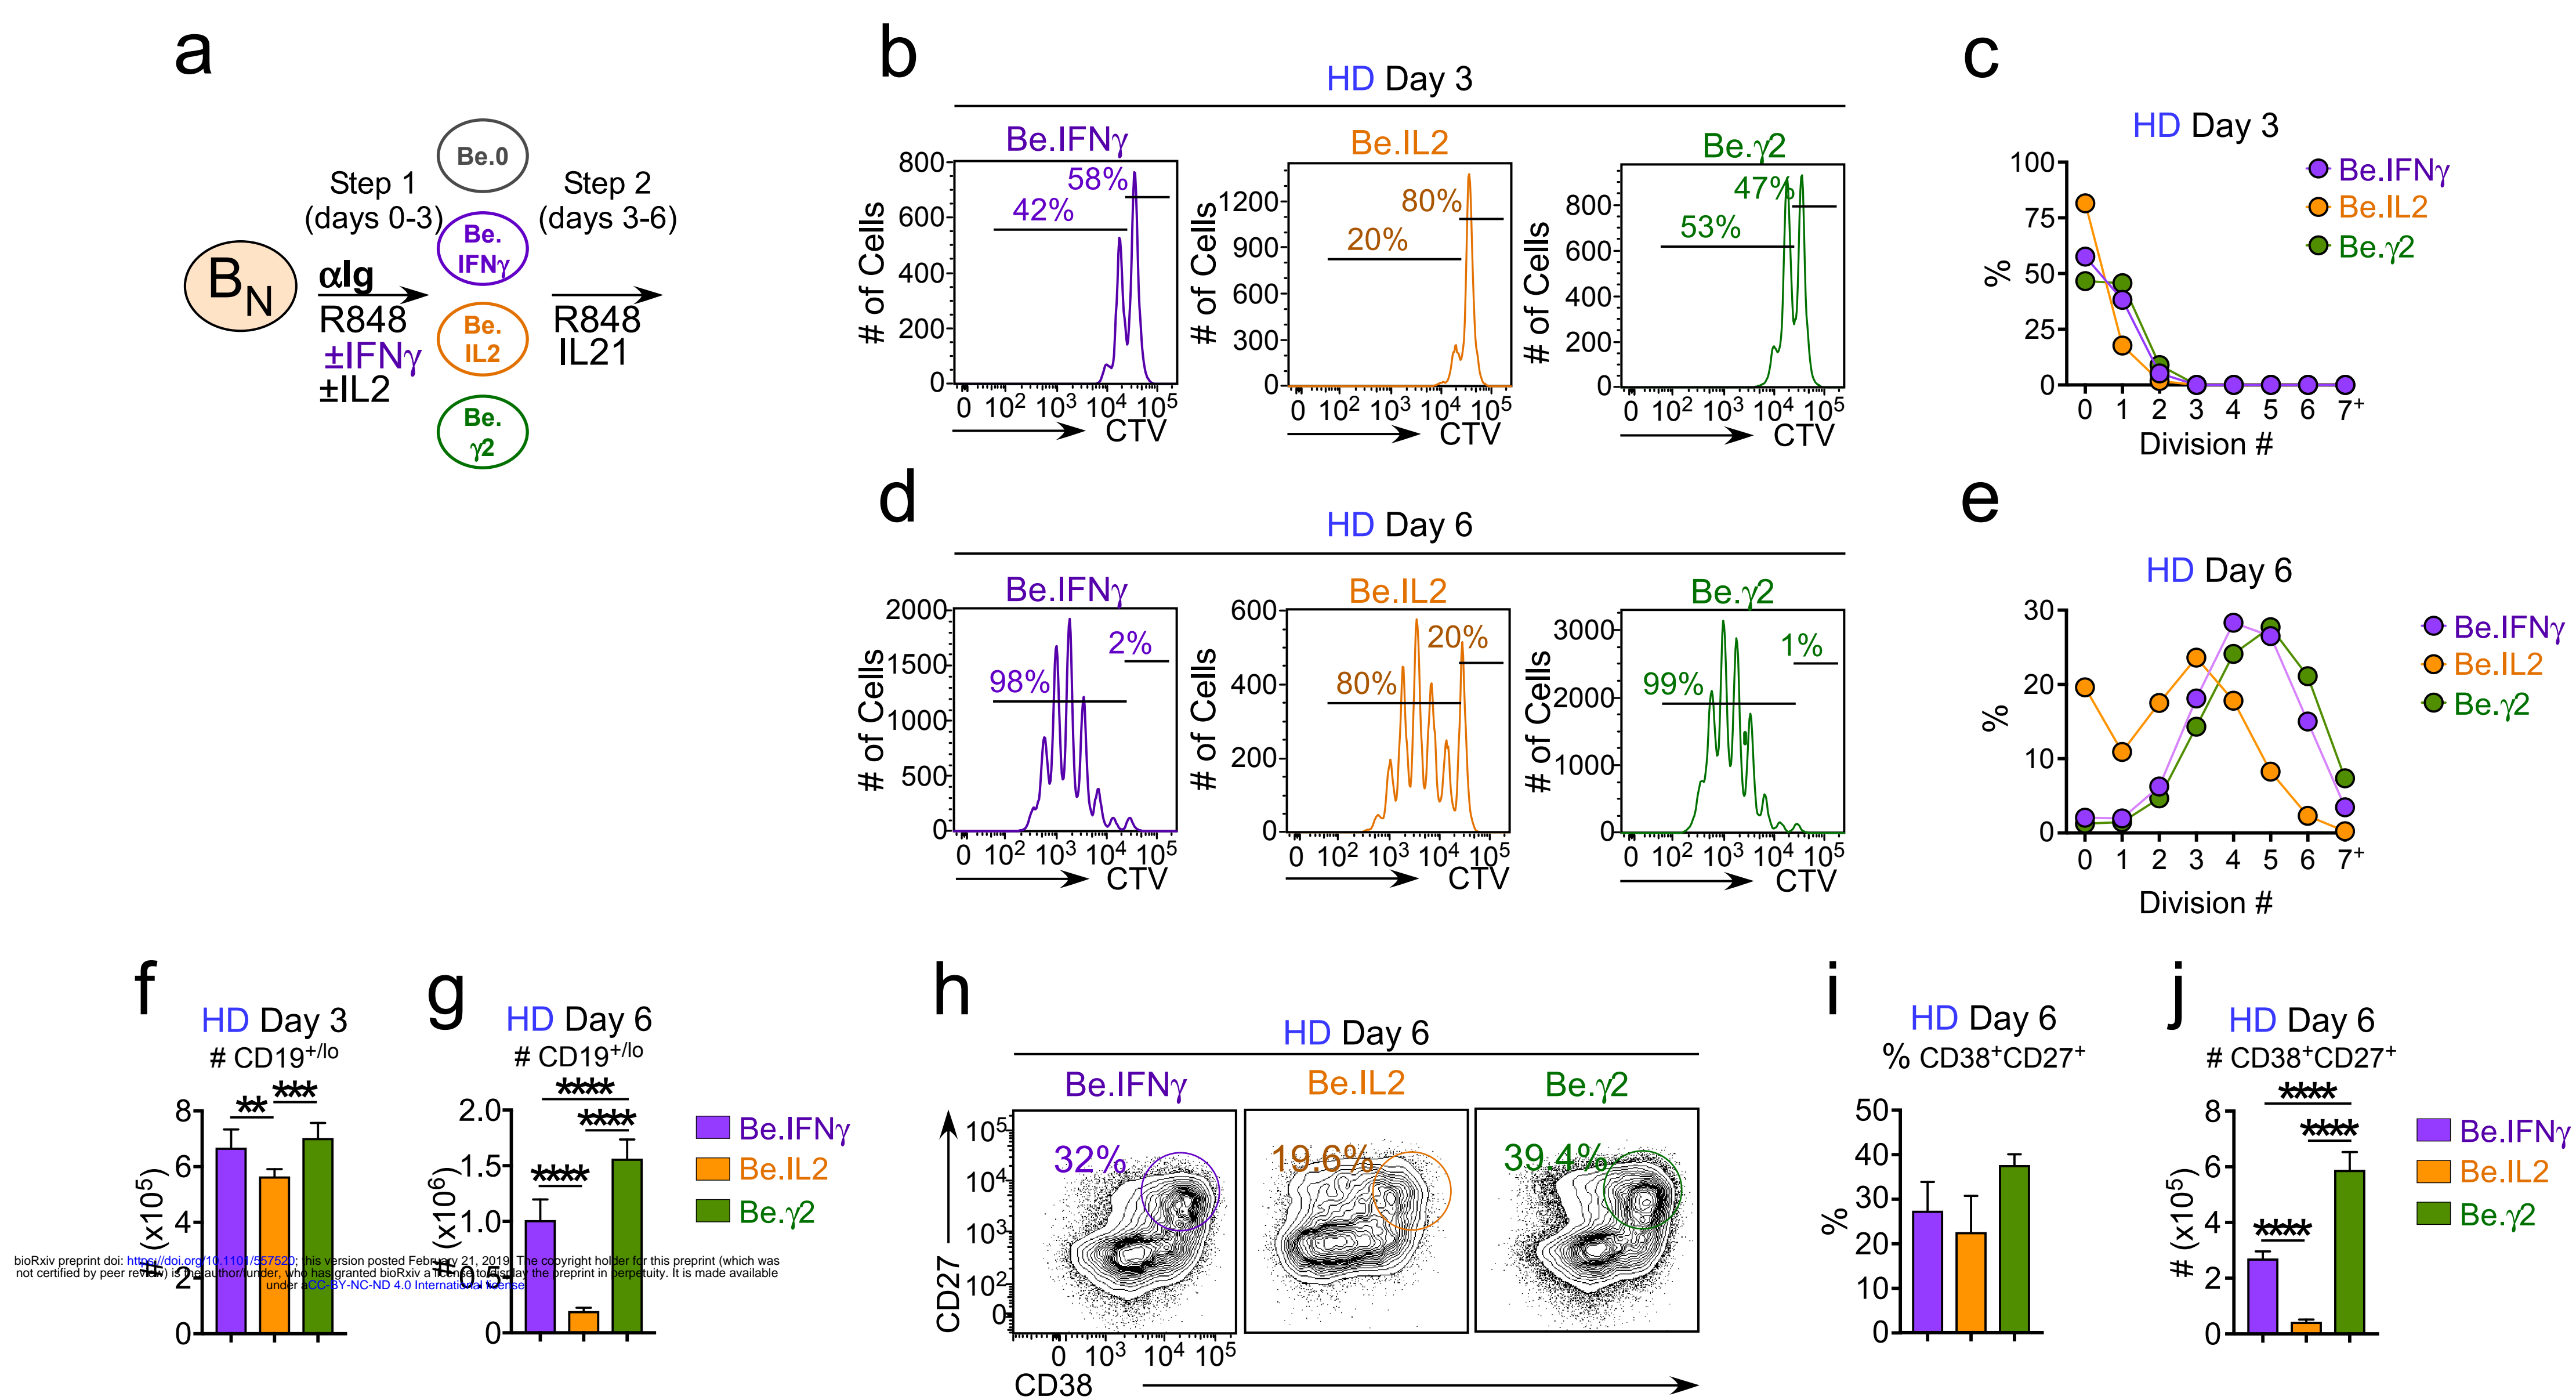

**Figure 9**

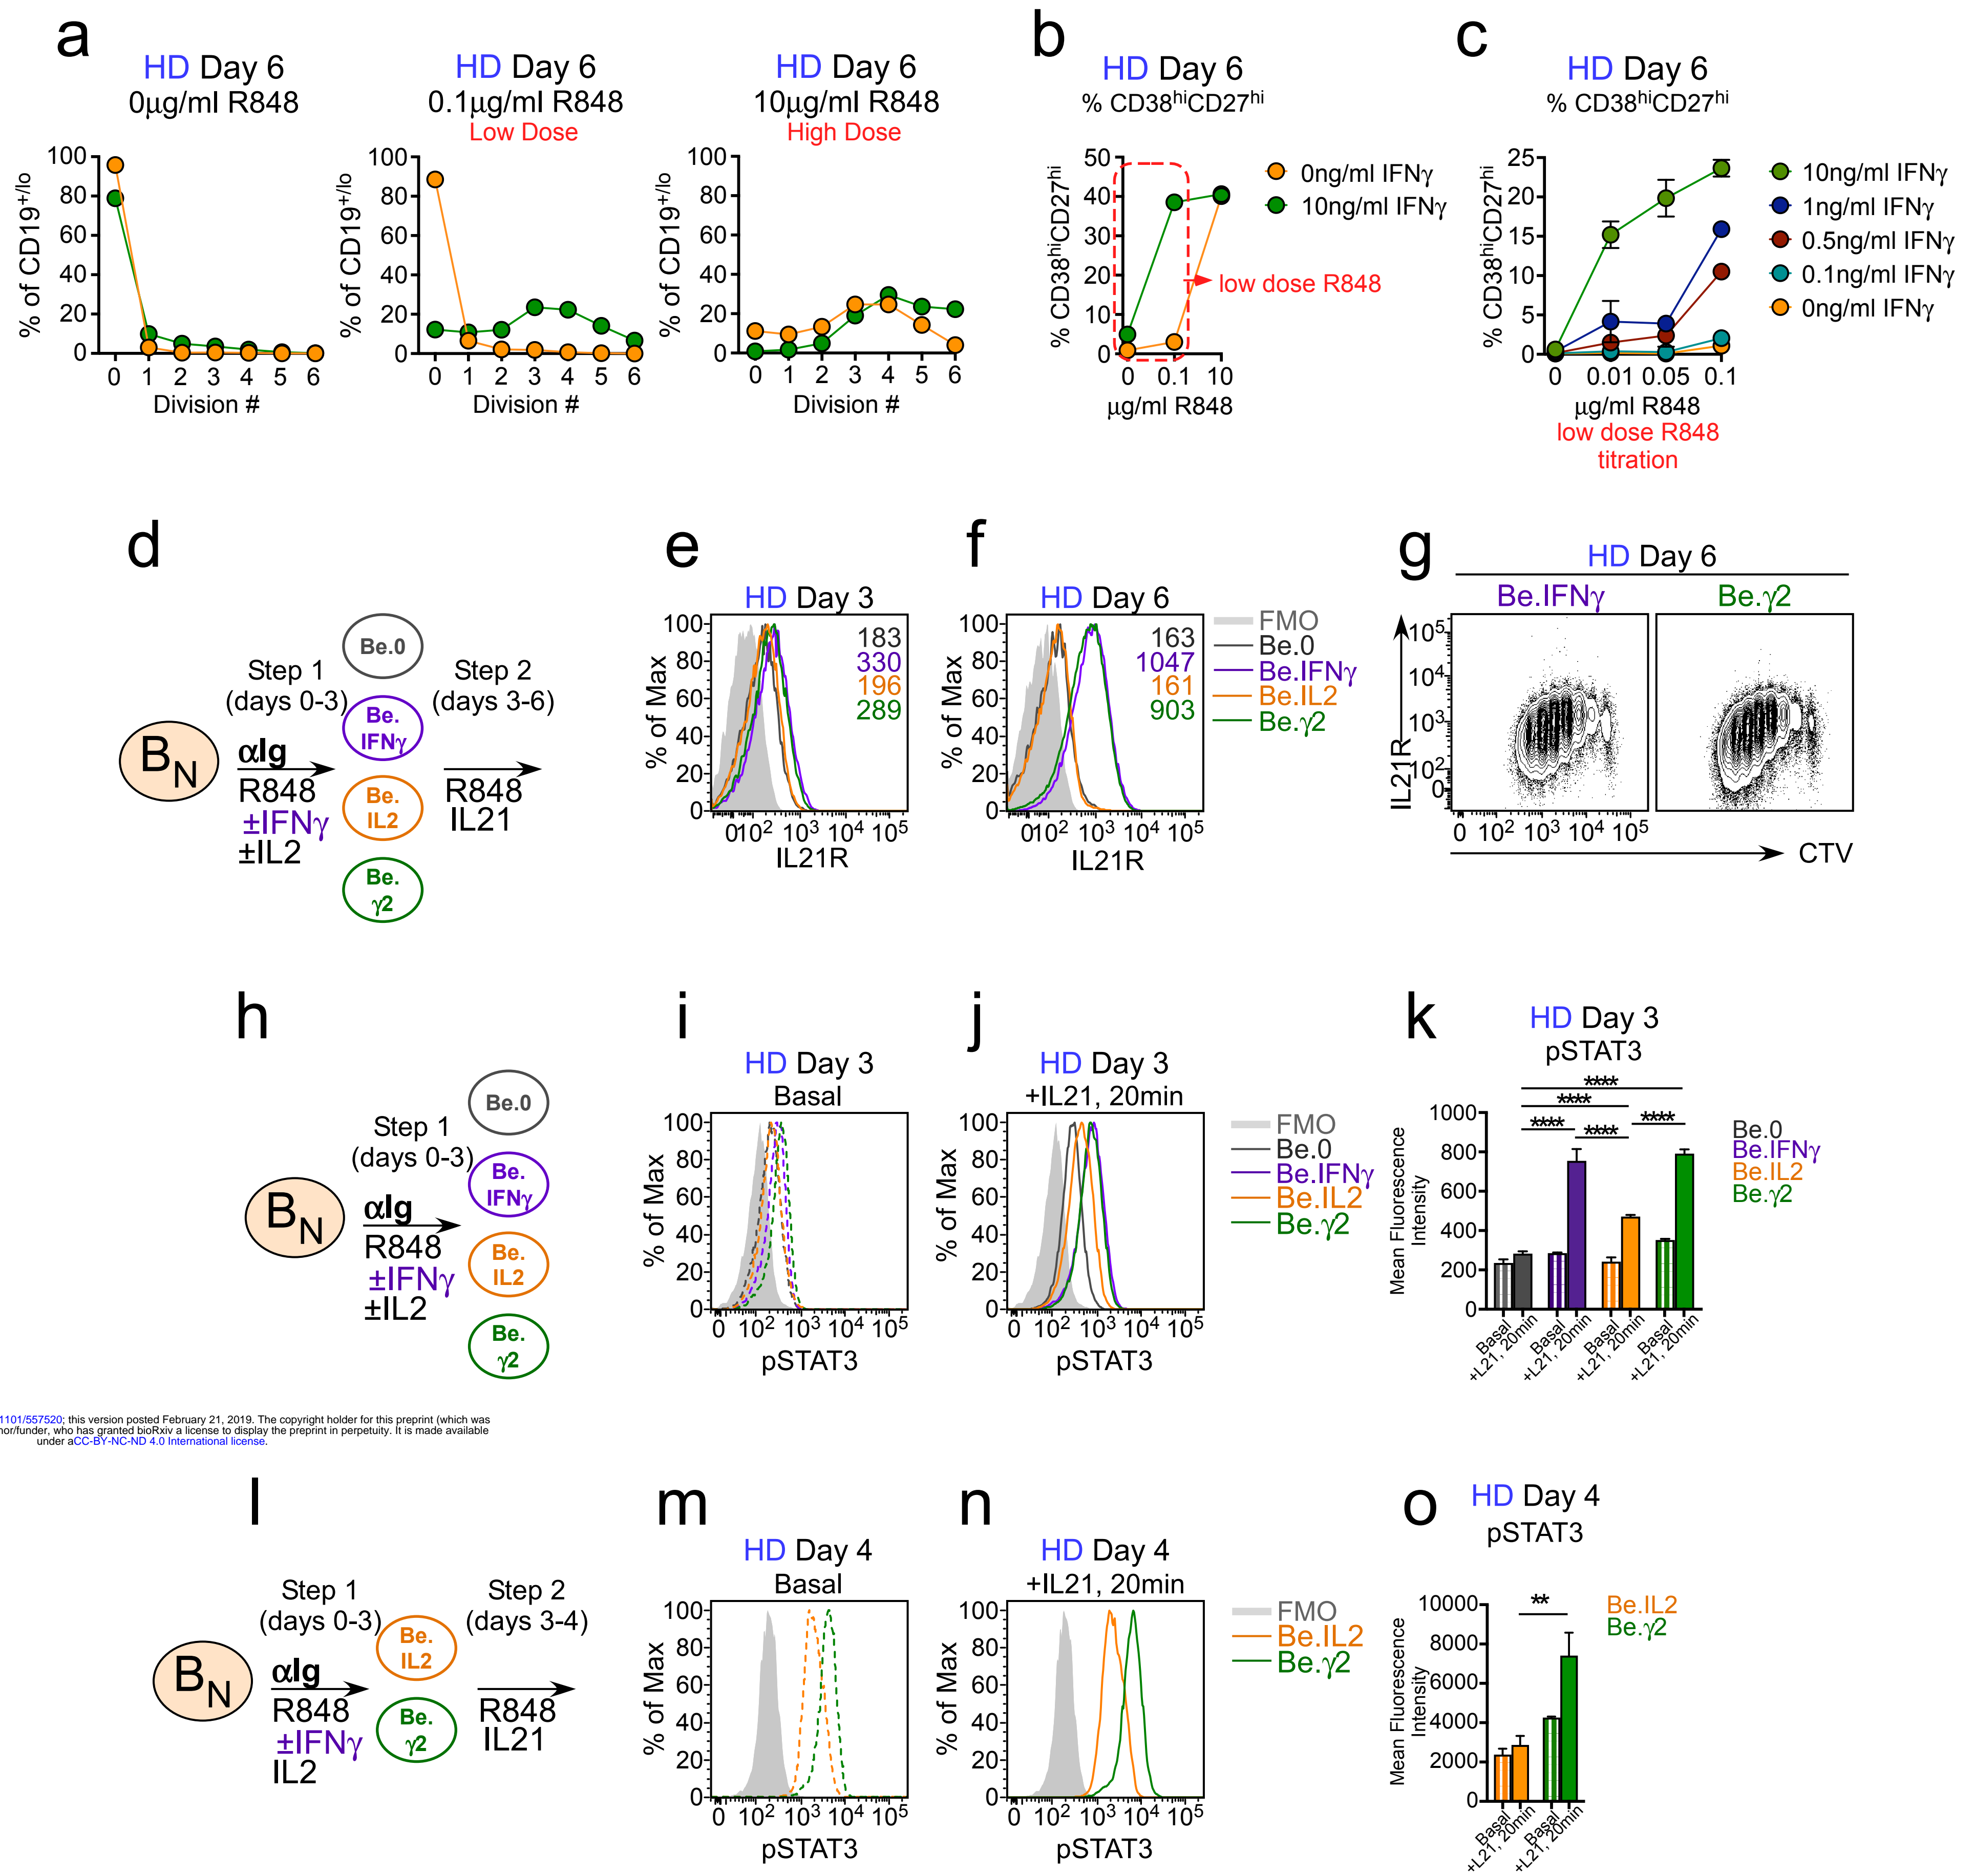

**Figure 10**

**a**

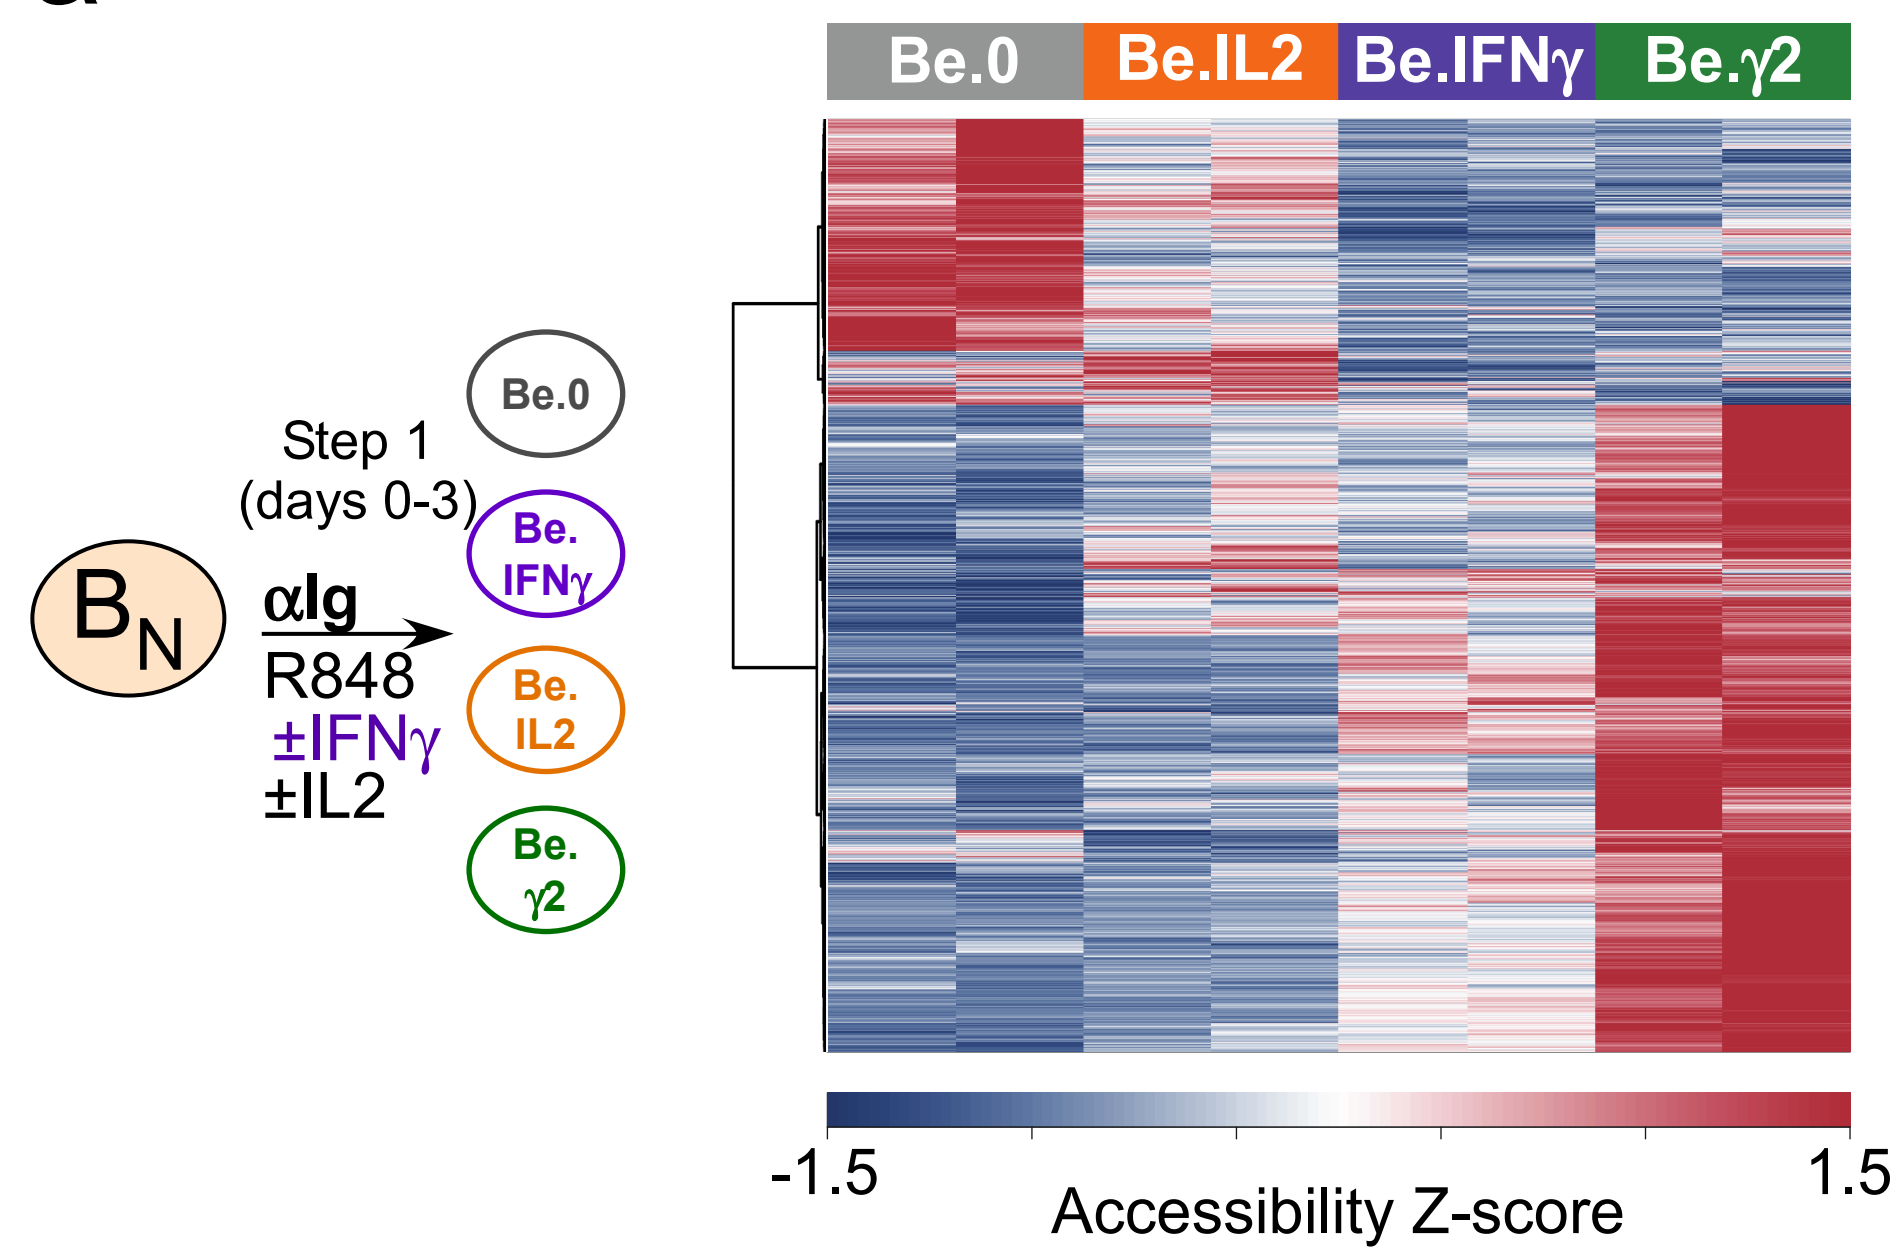

**b**

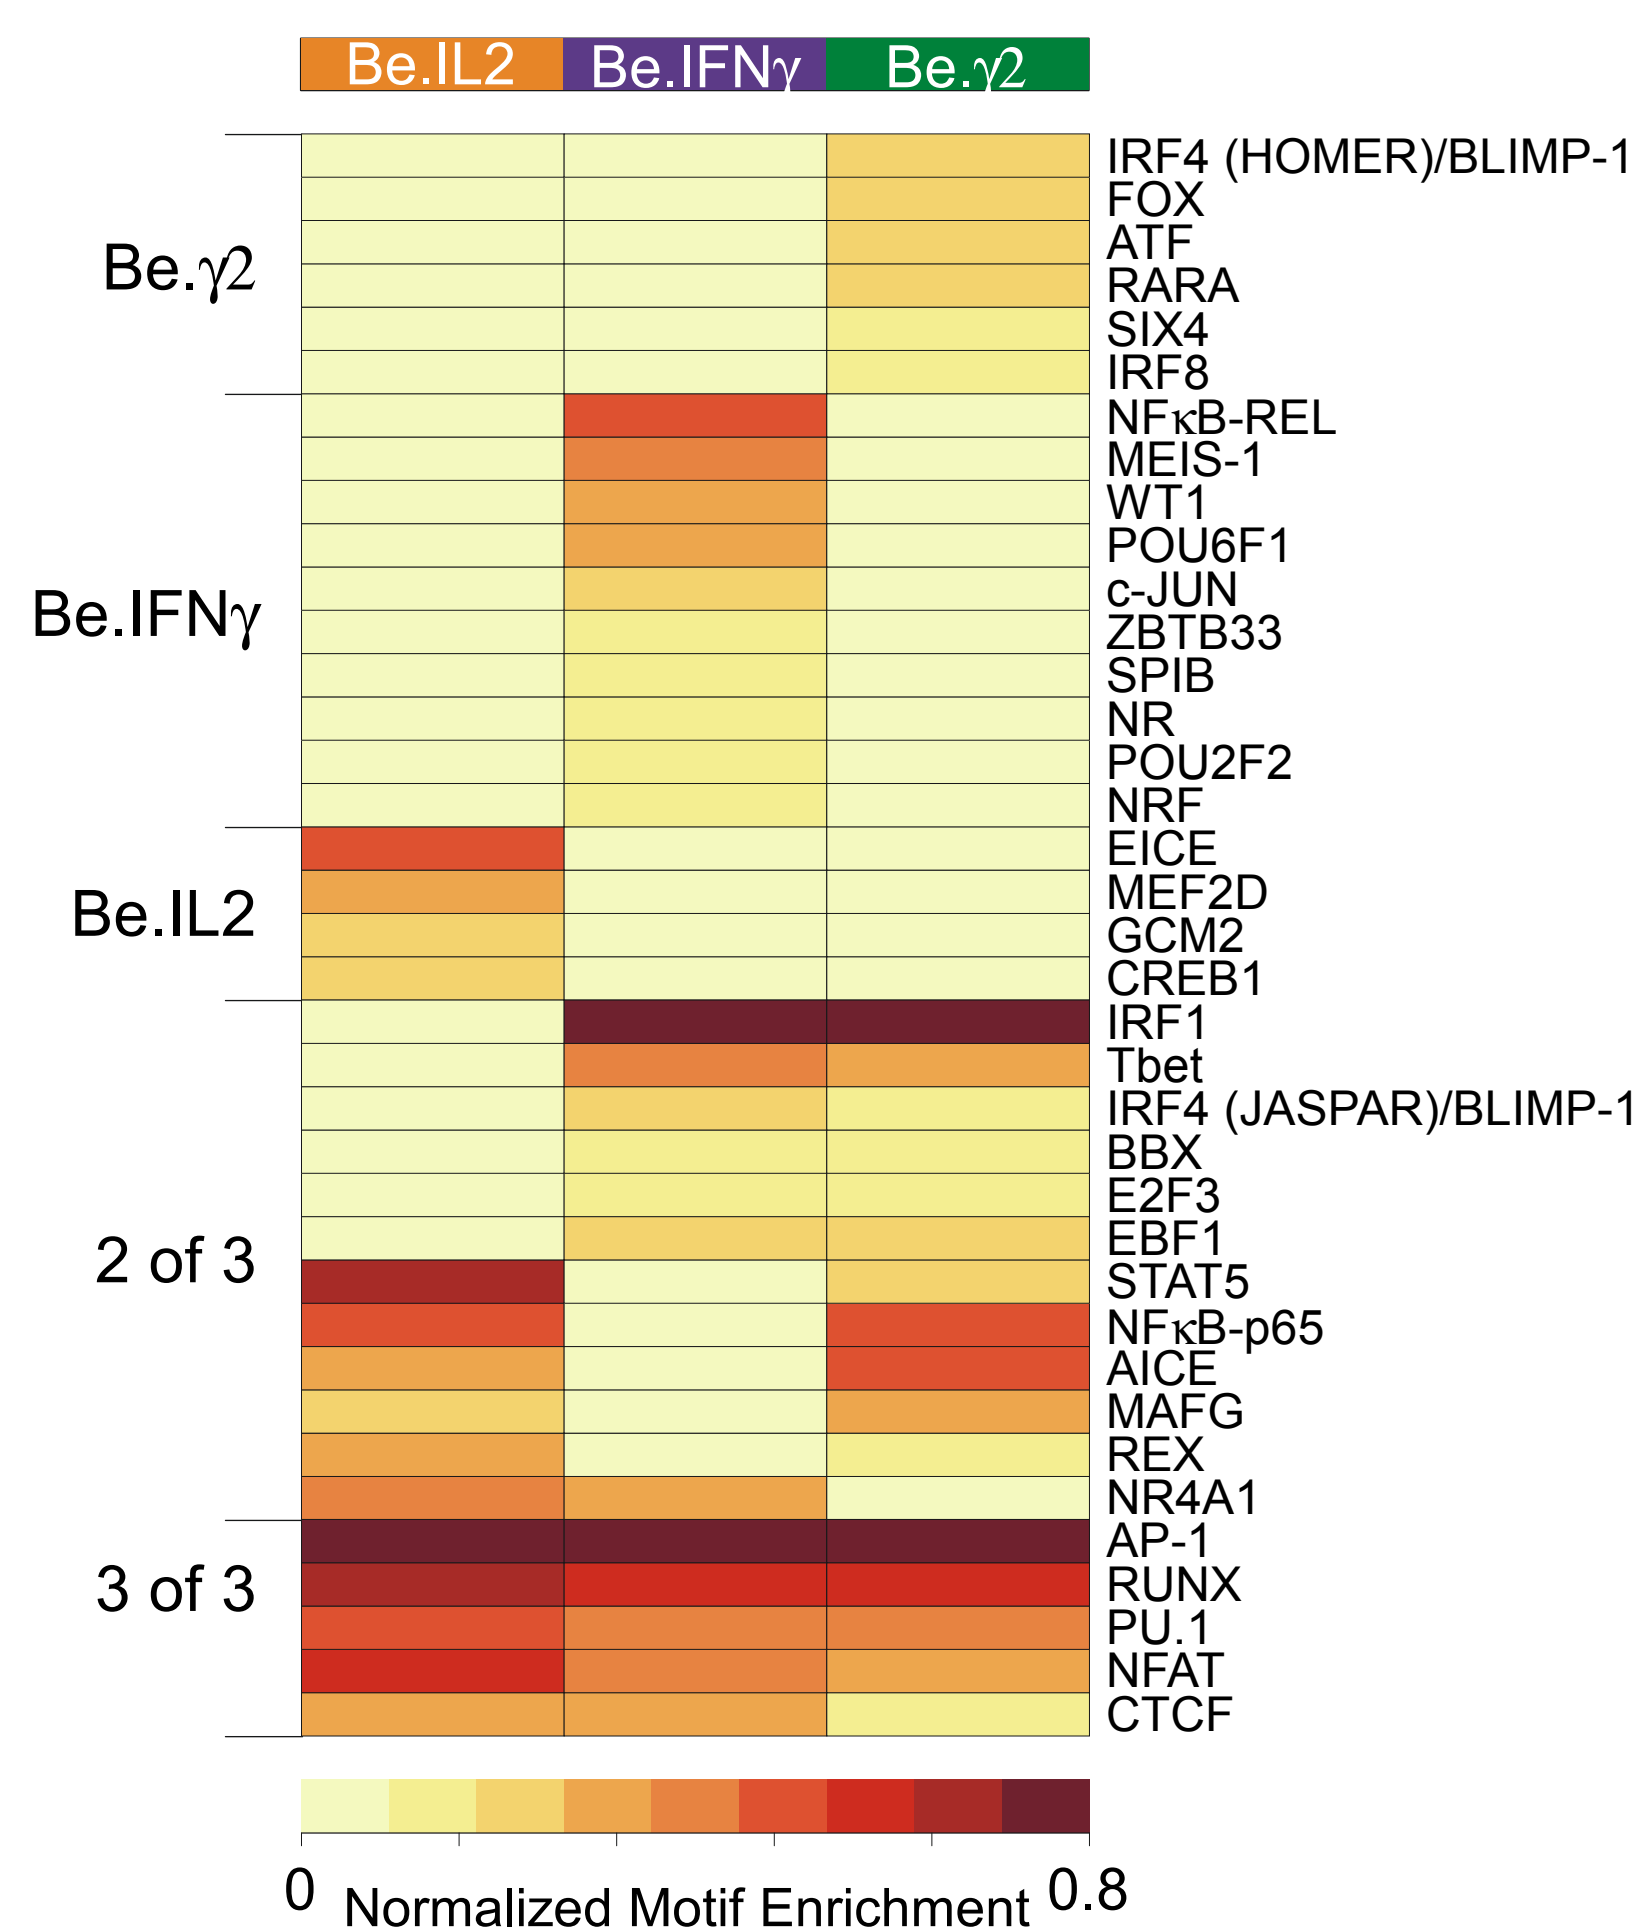

**c**

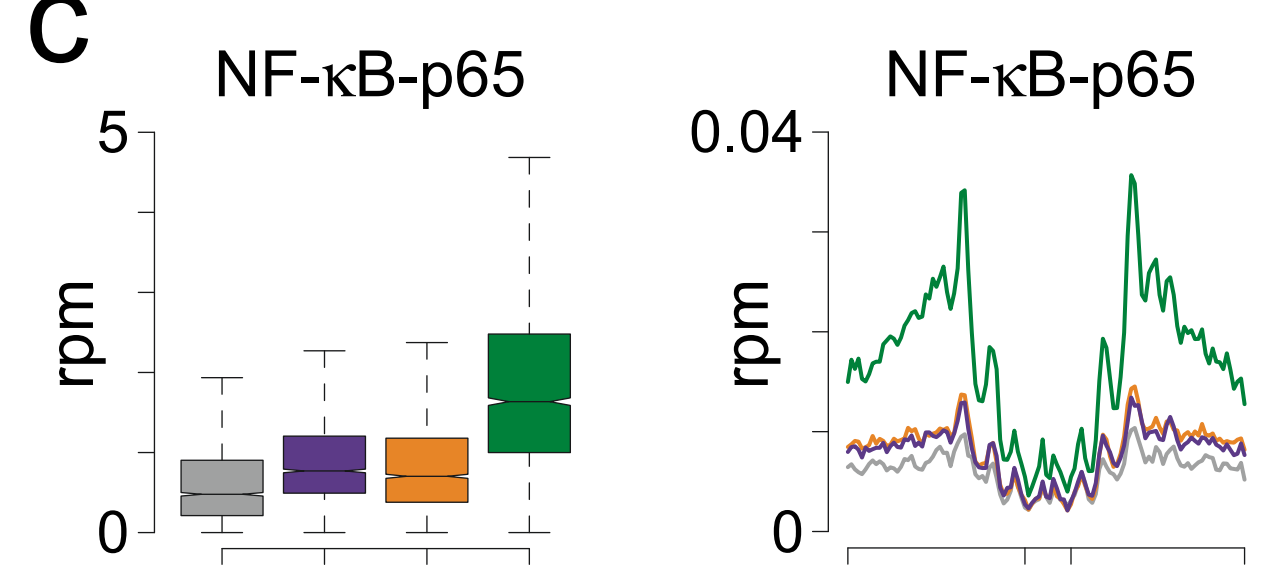

**d**

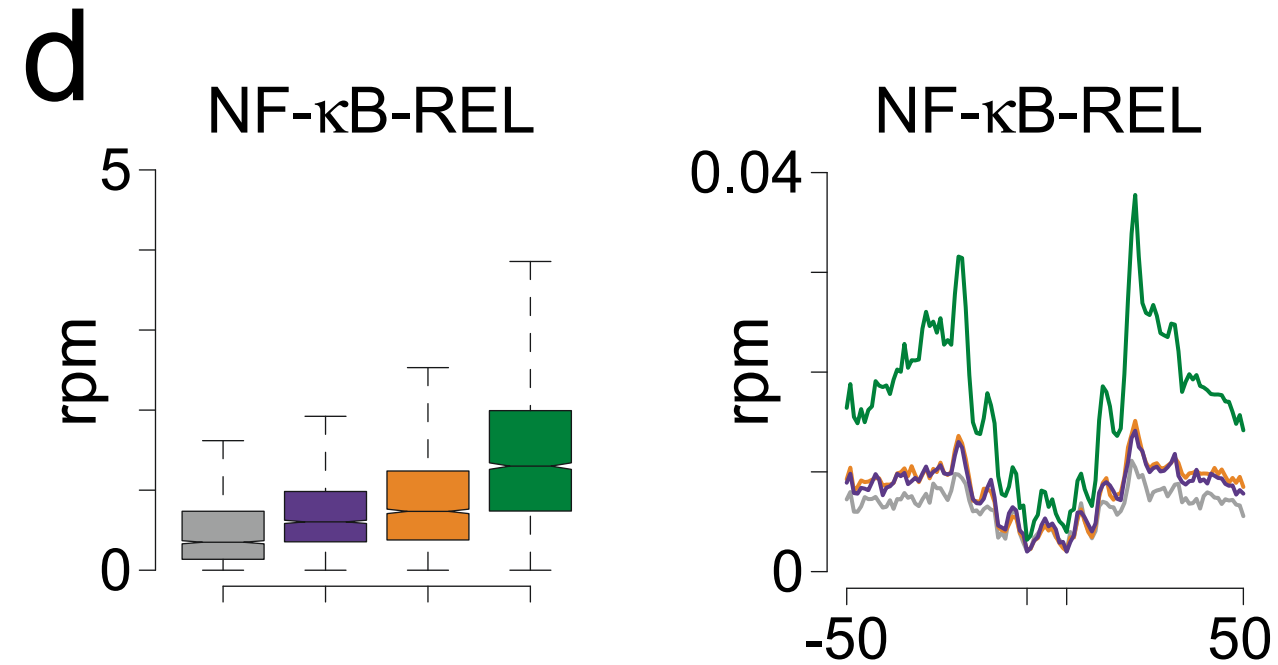

**e**

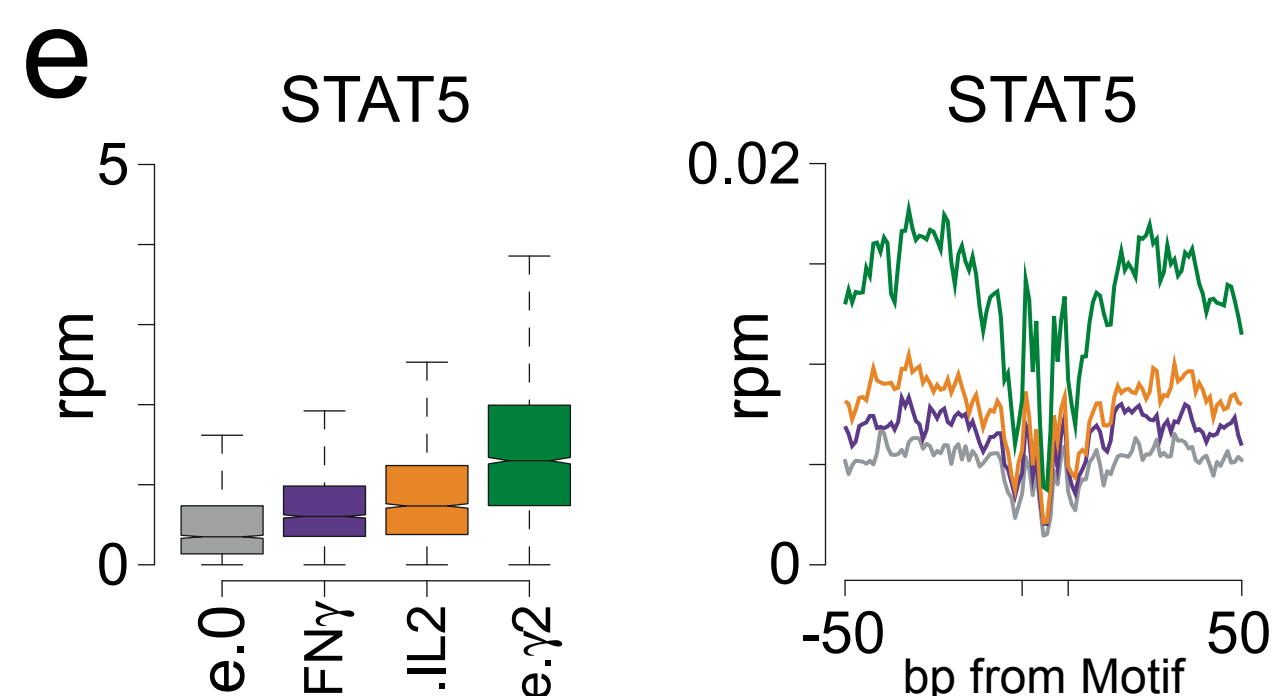

**f**

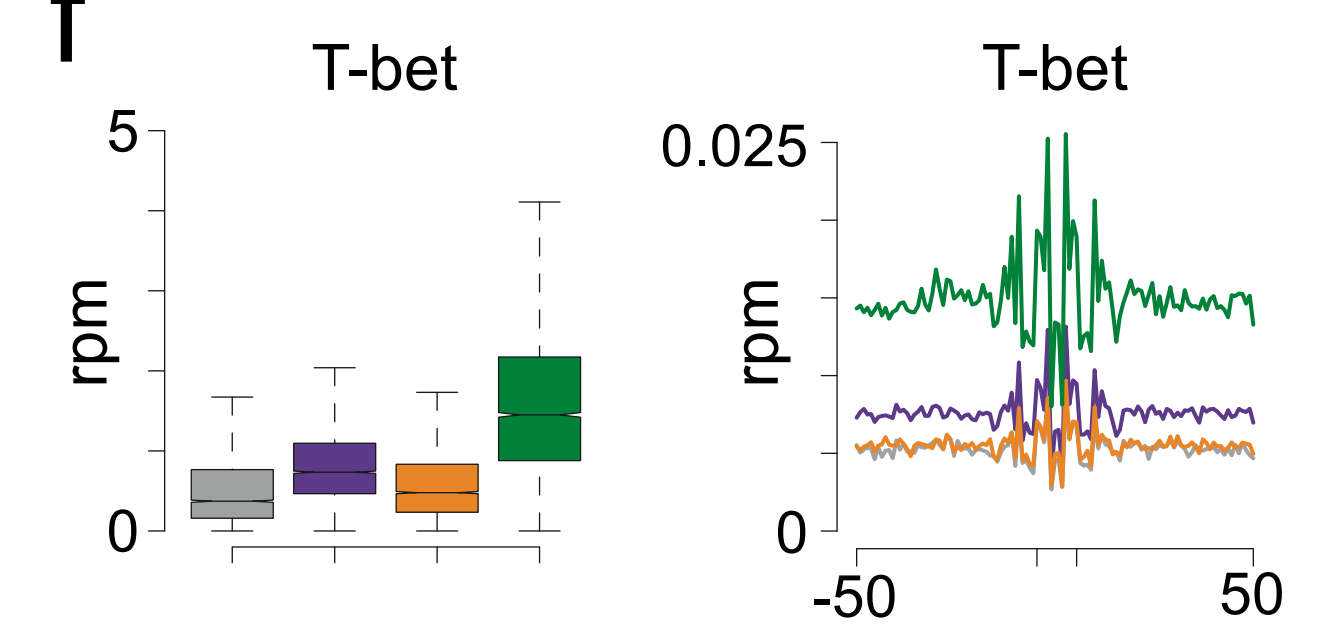

**g**

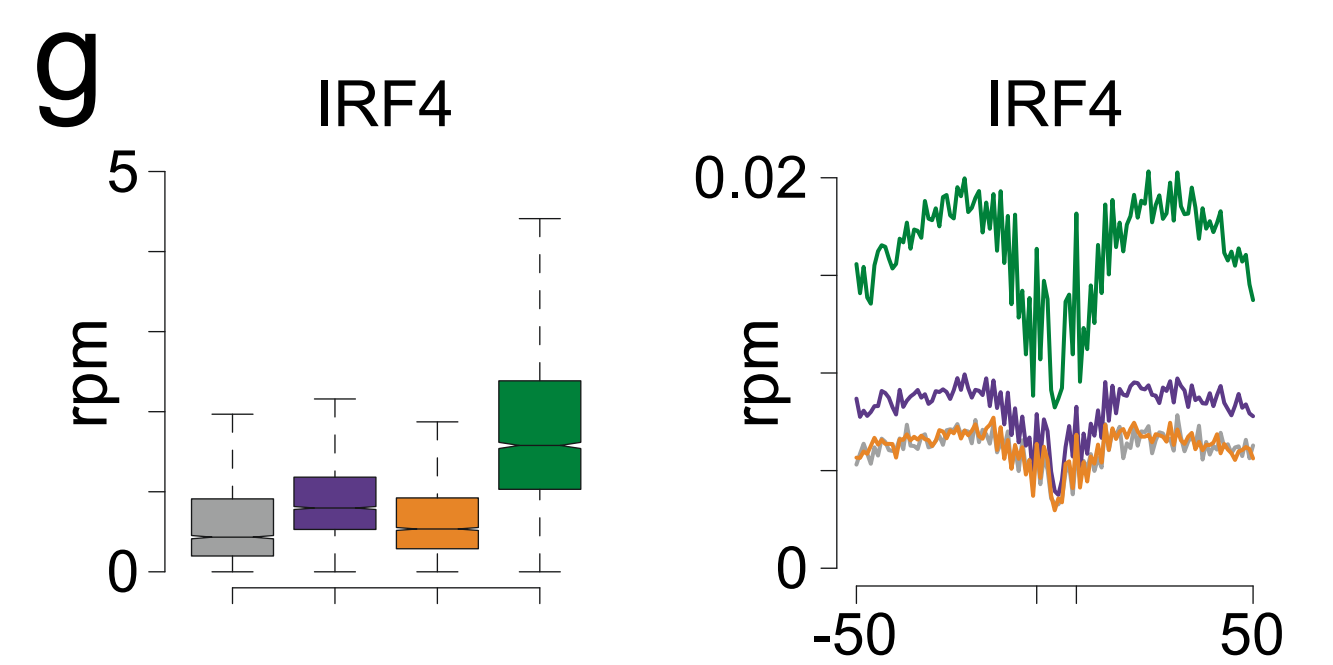

**h**

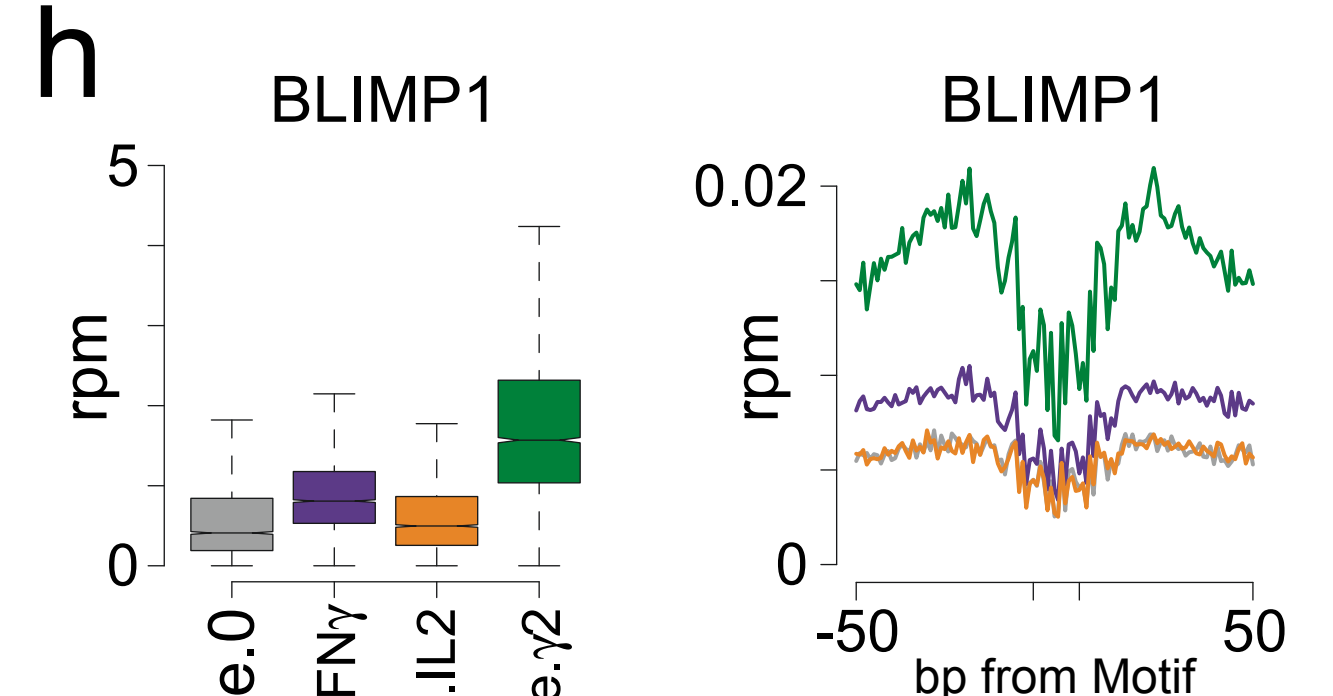

**i**

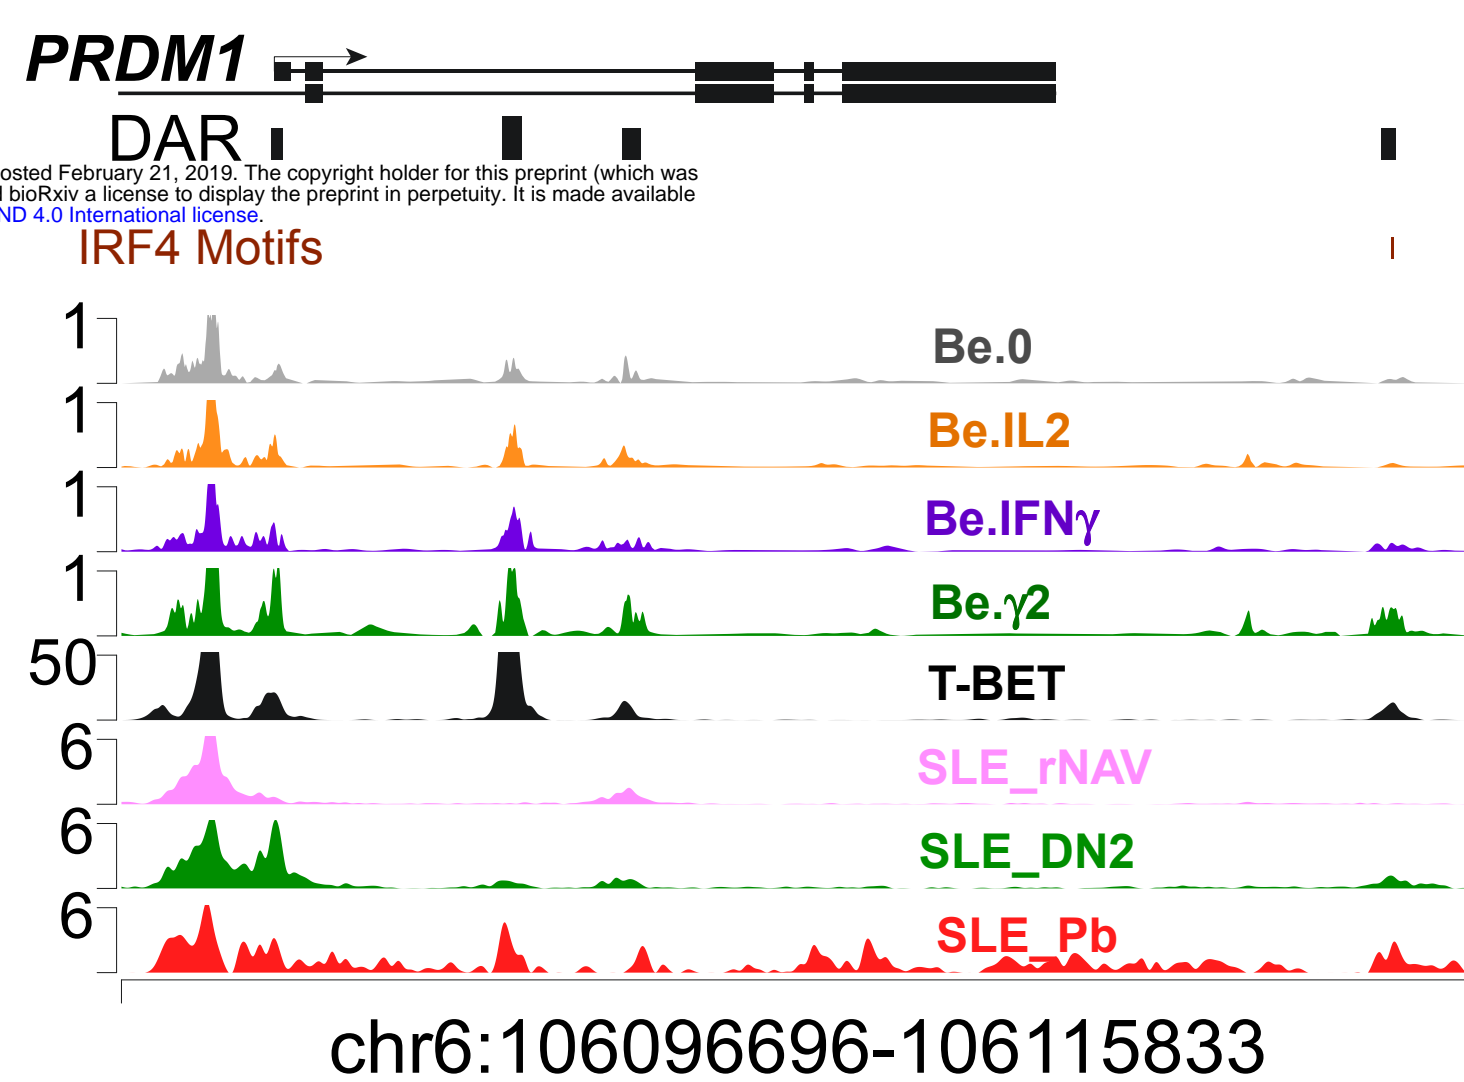

**j**

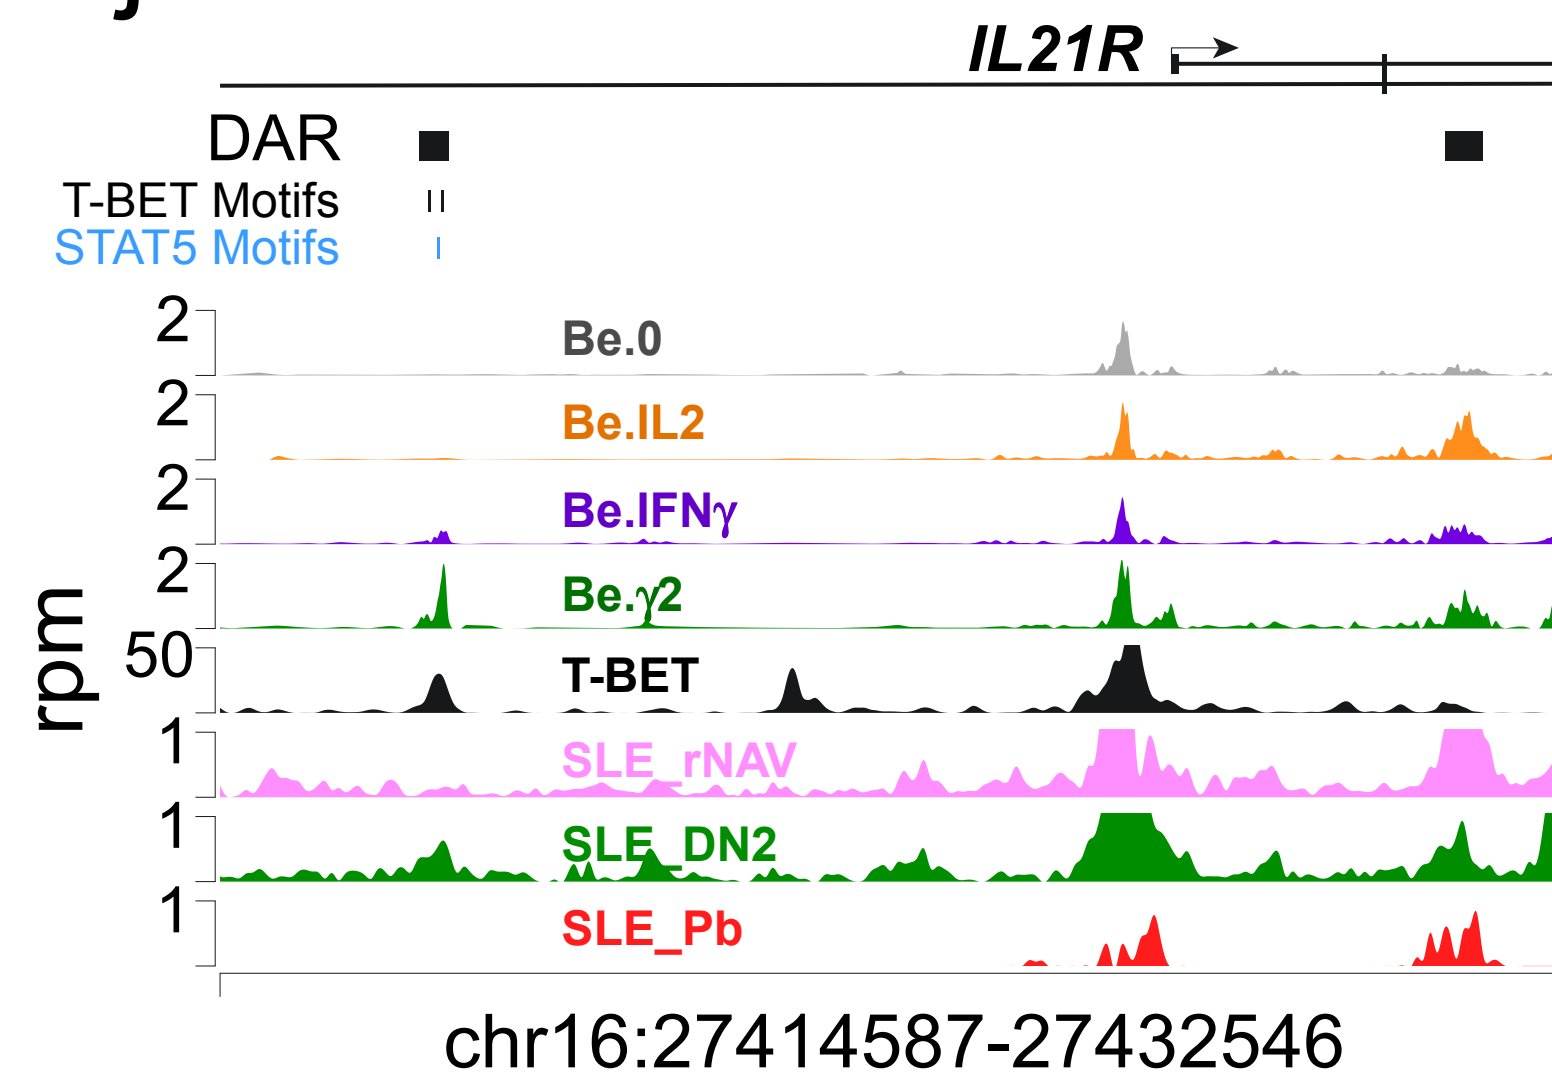

**k**

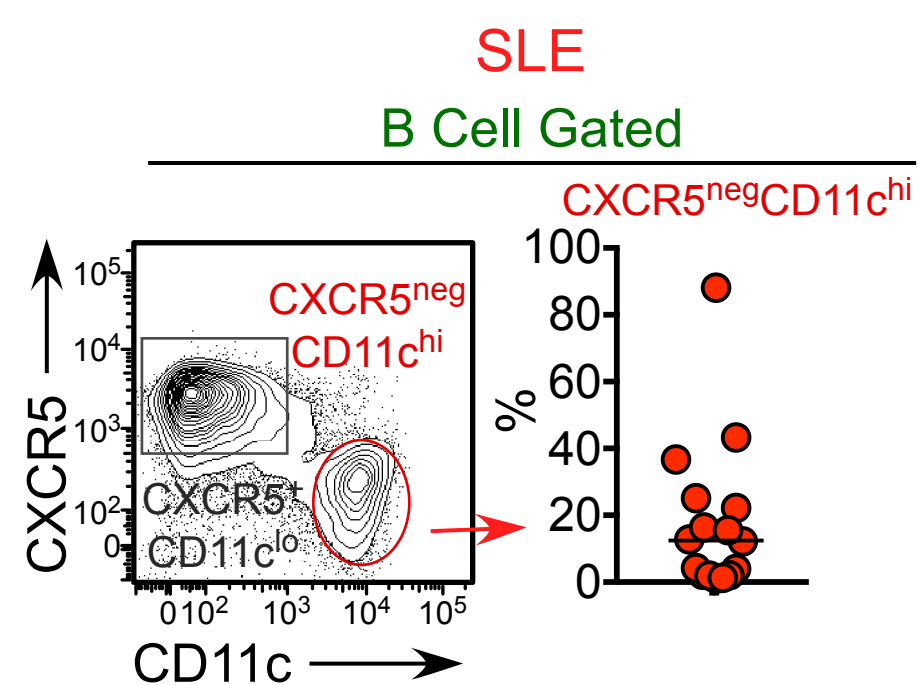

**l**

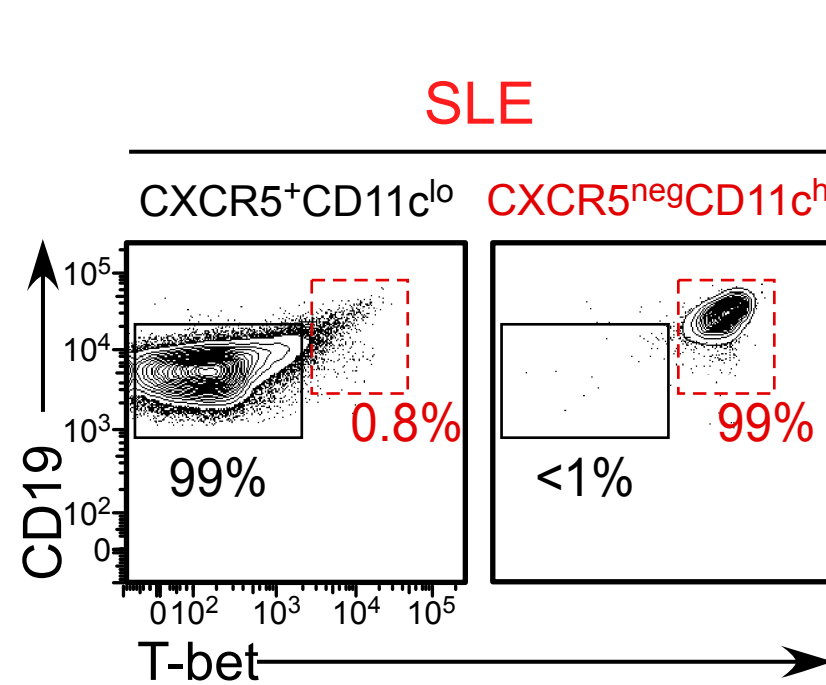

**m**

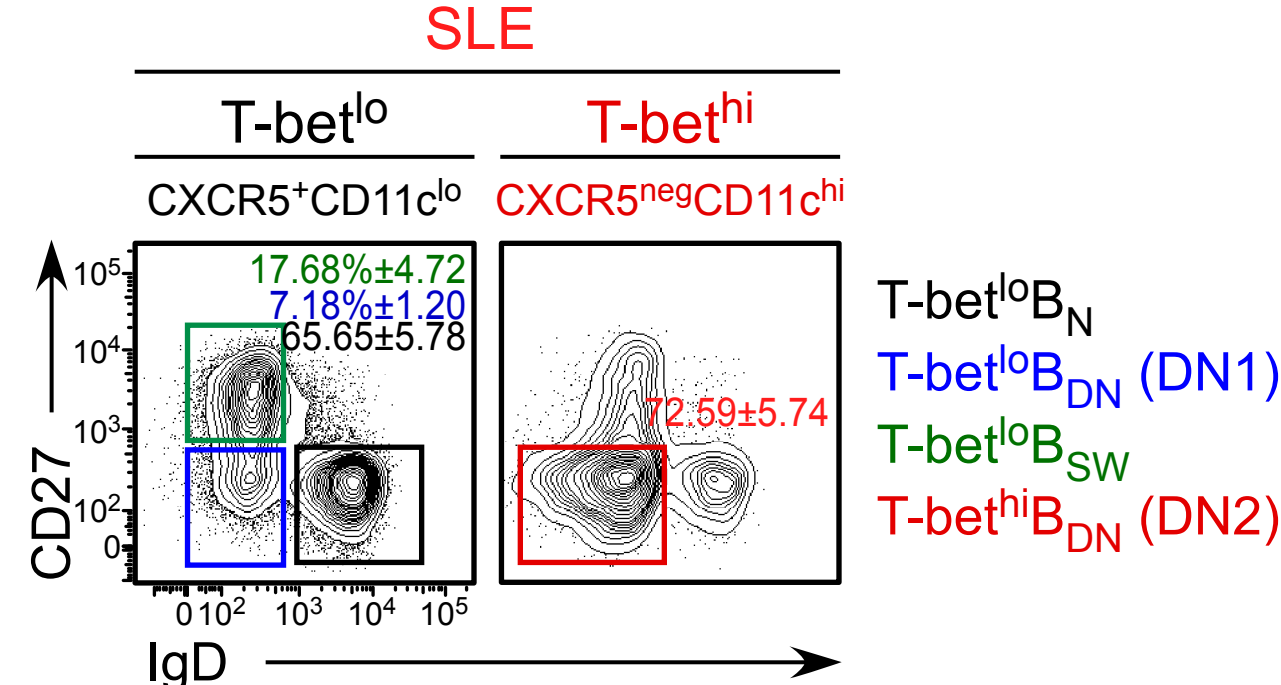

**n**

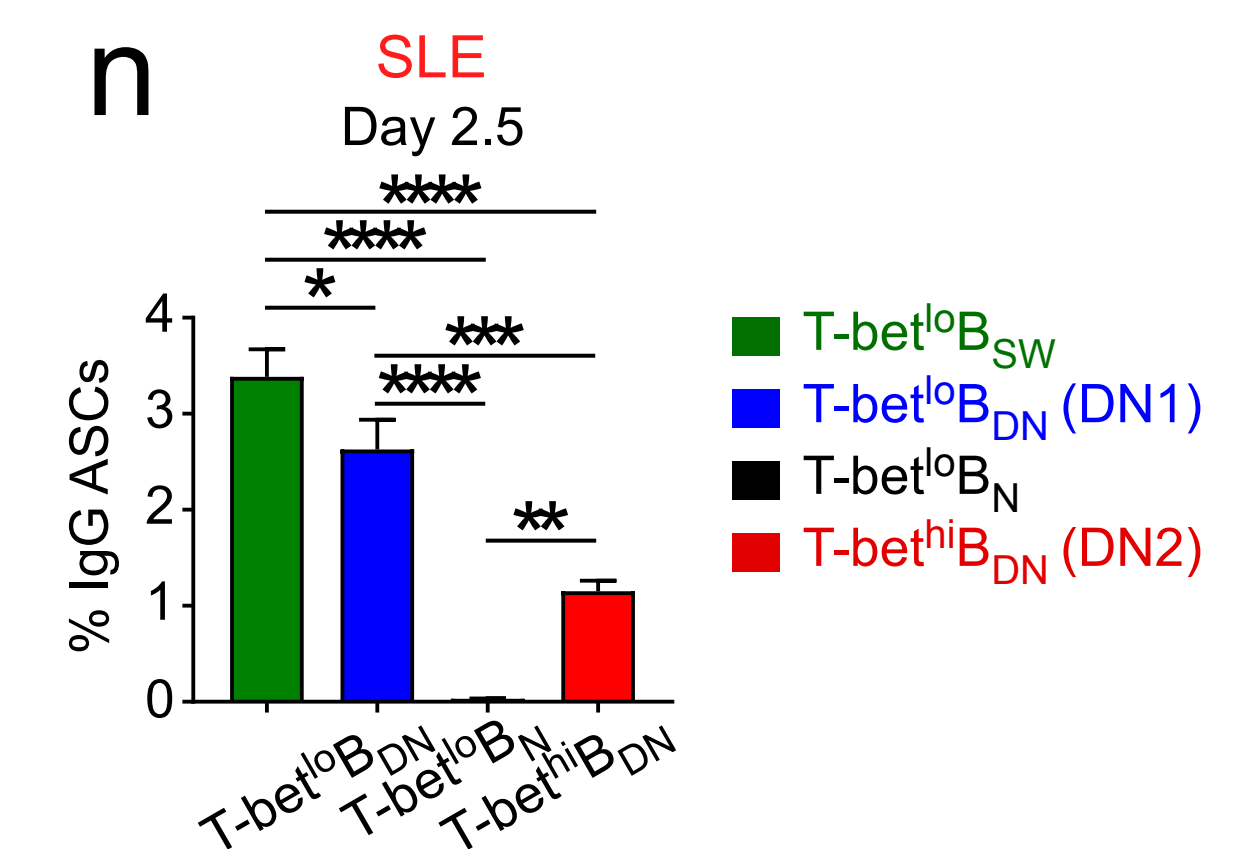

## Figure 1- Figure Supplement 1

**a**

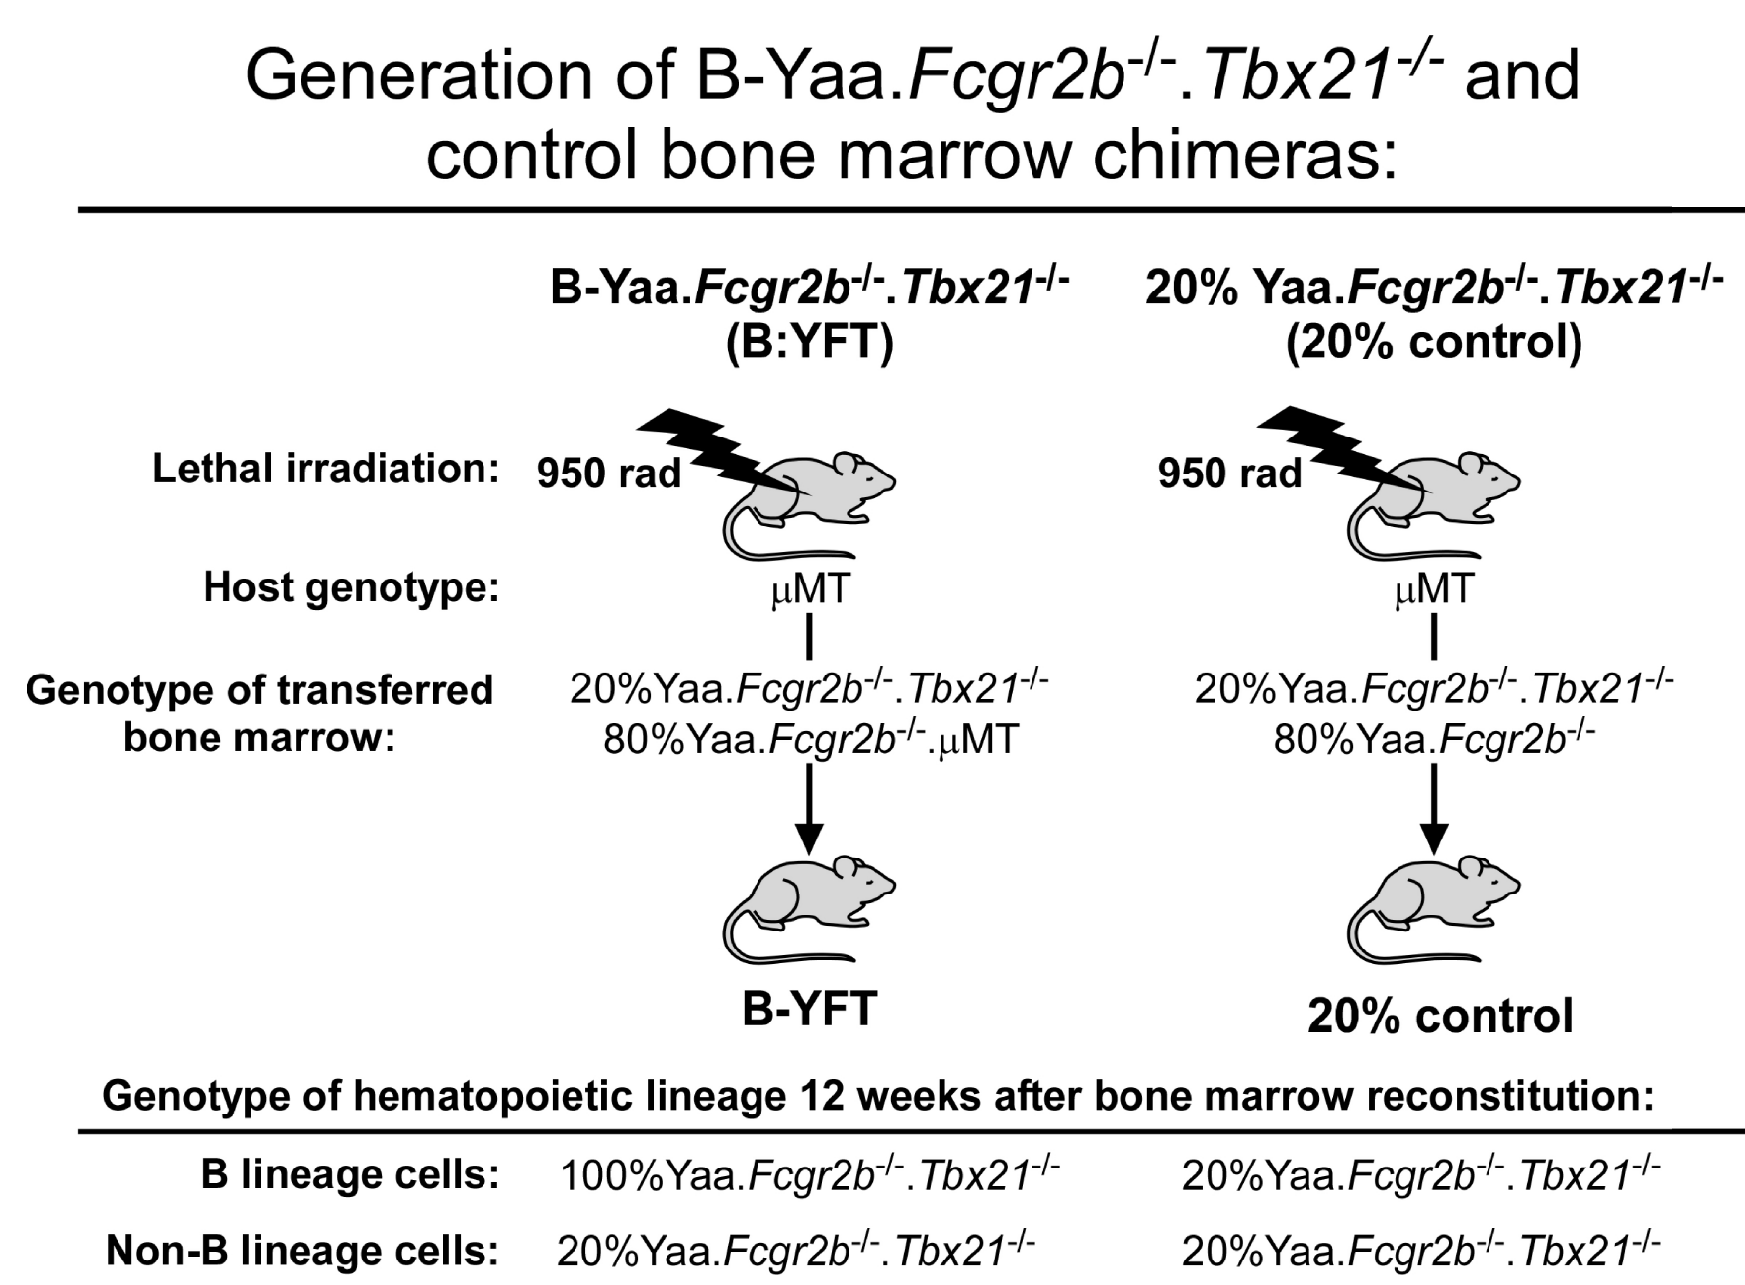

**b**

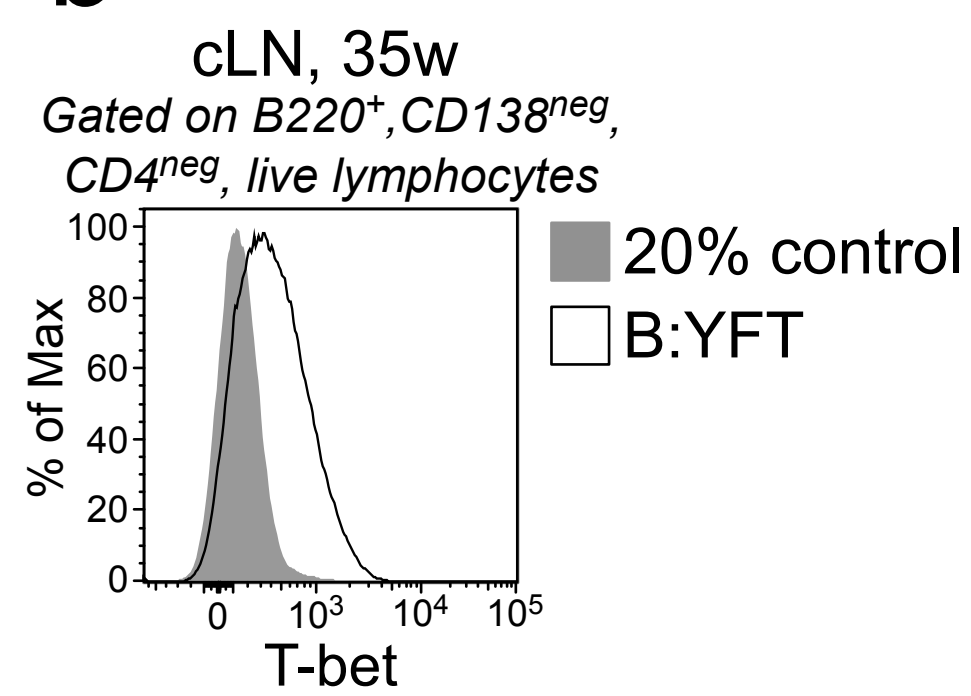

**c**

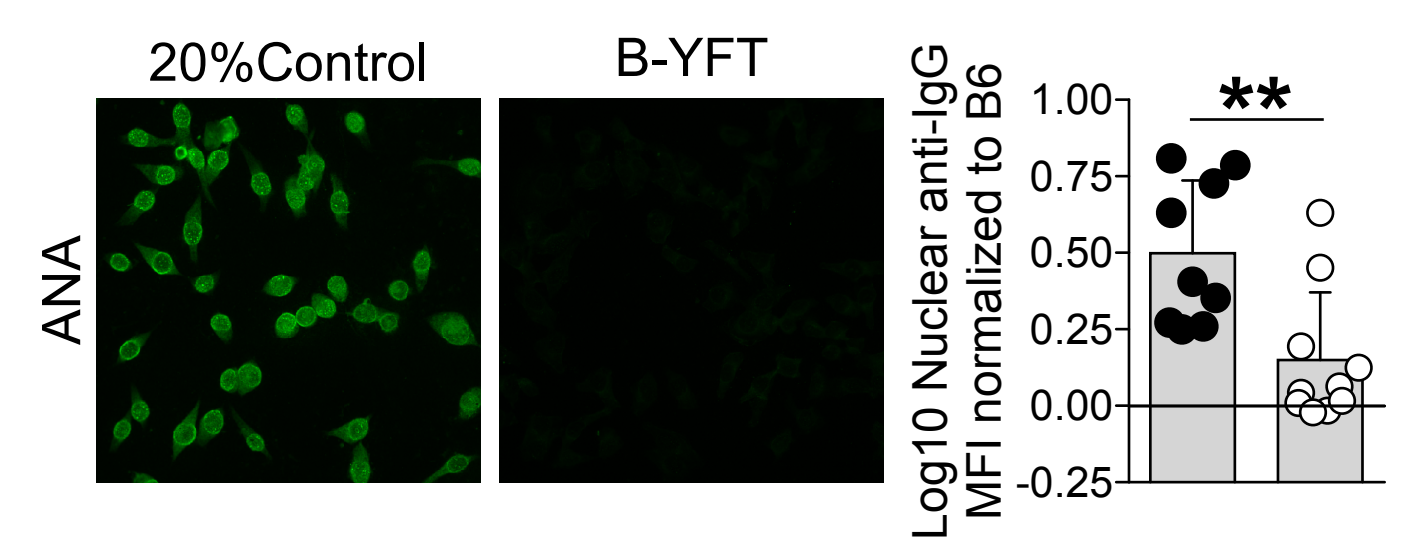

**d**

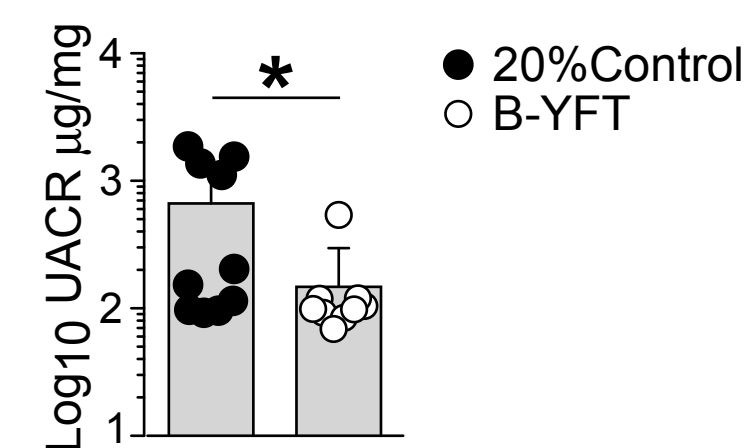

**e**

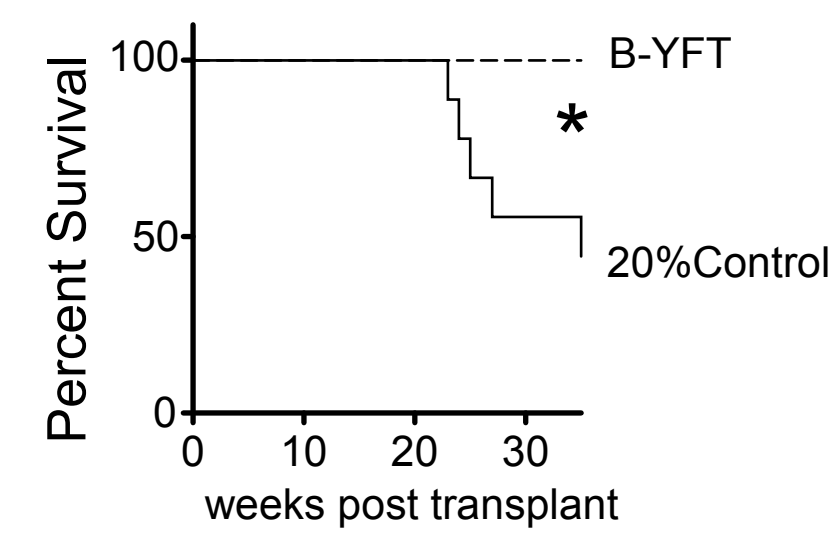

**Figure 3 - Figure Supplement 1**

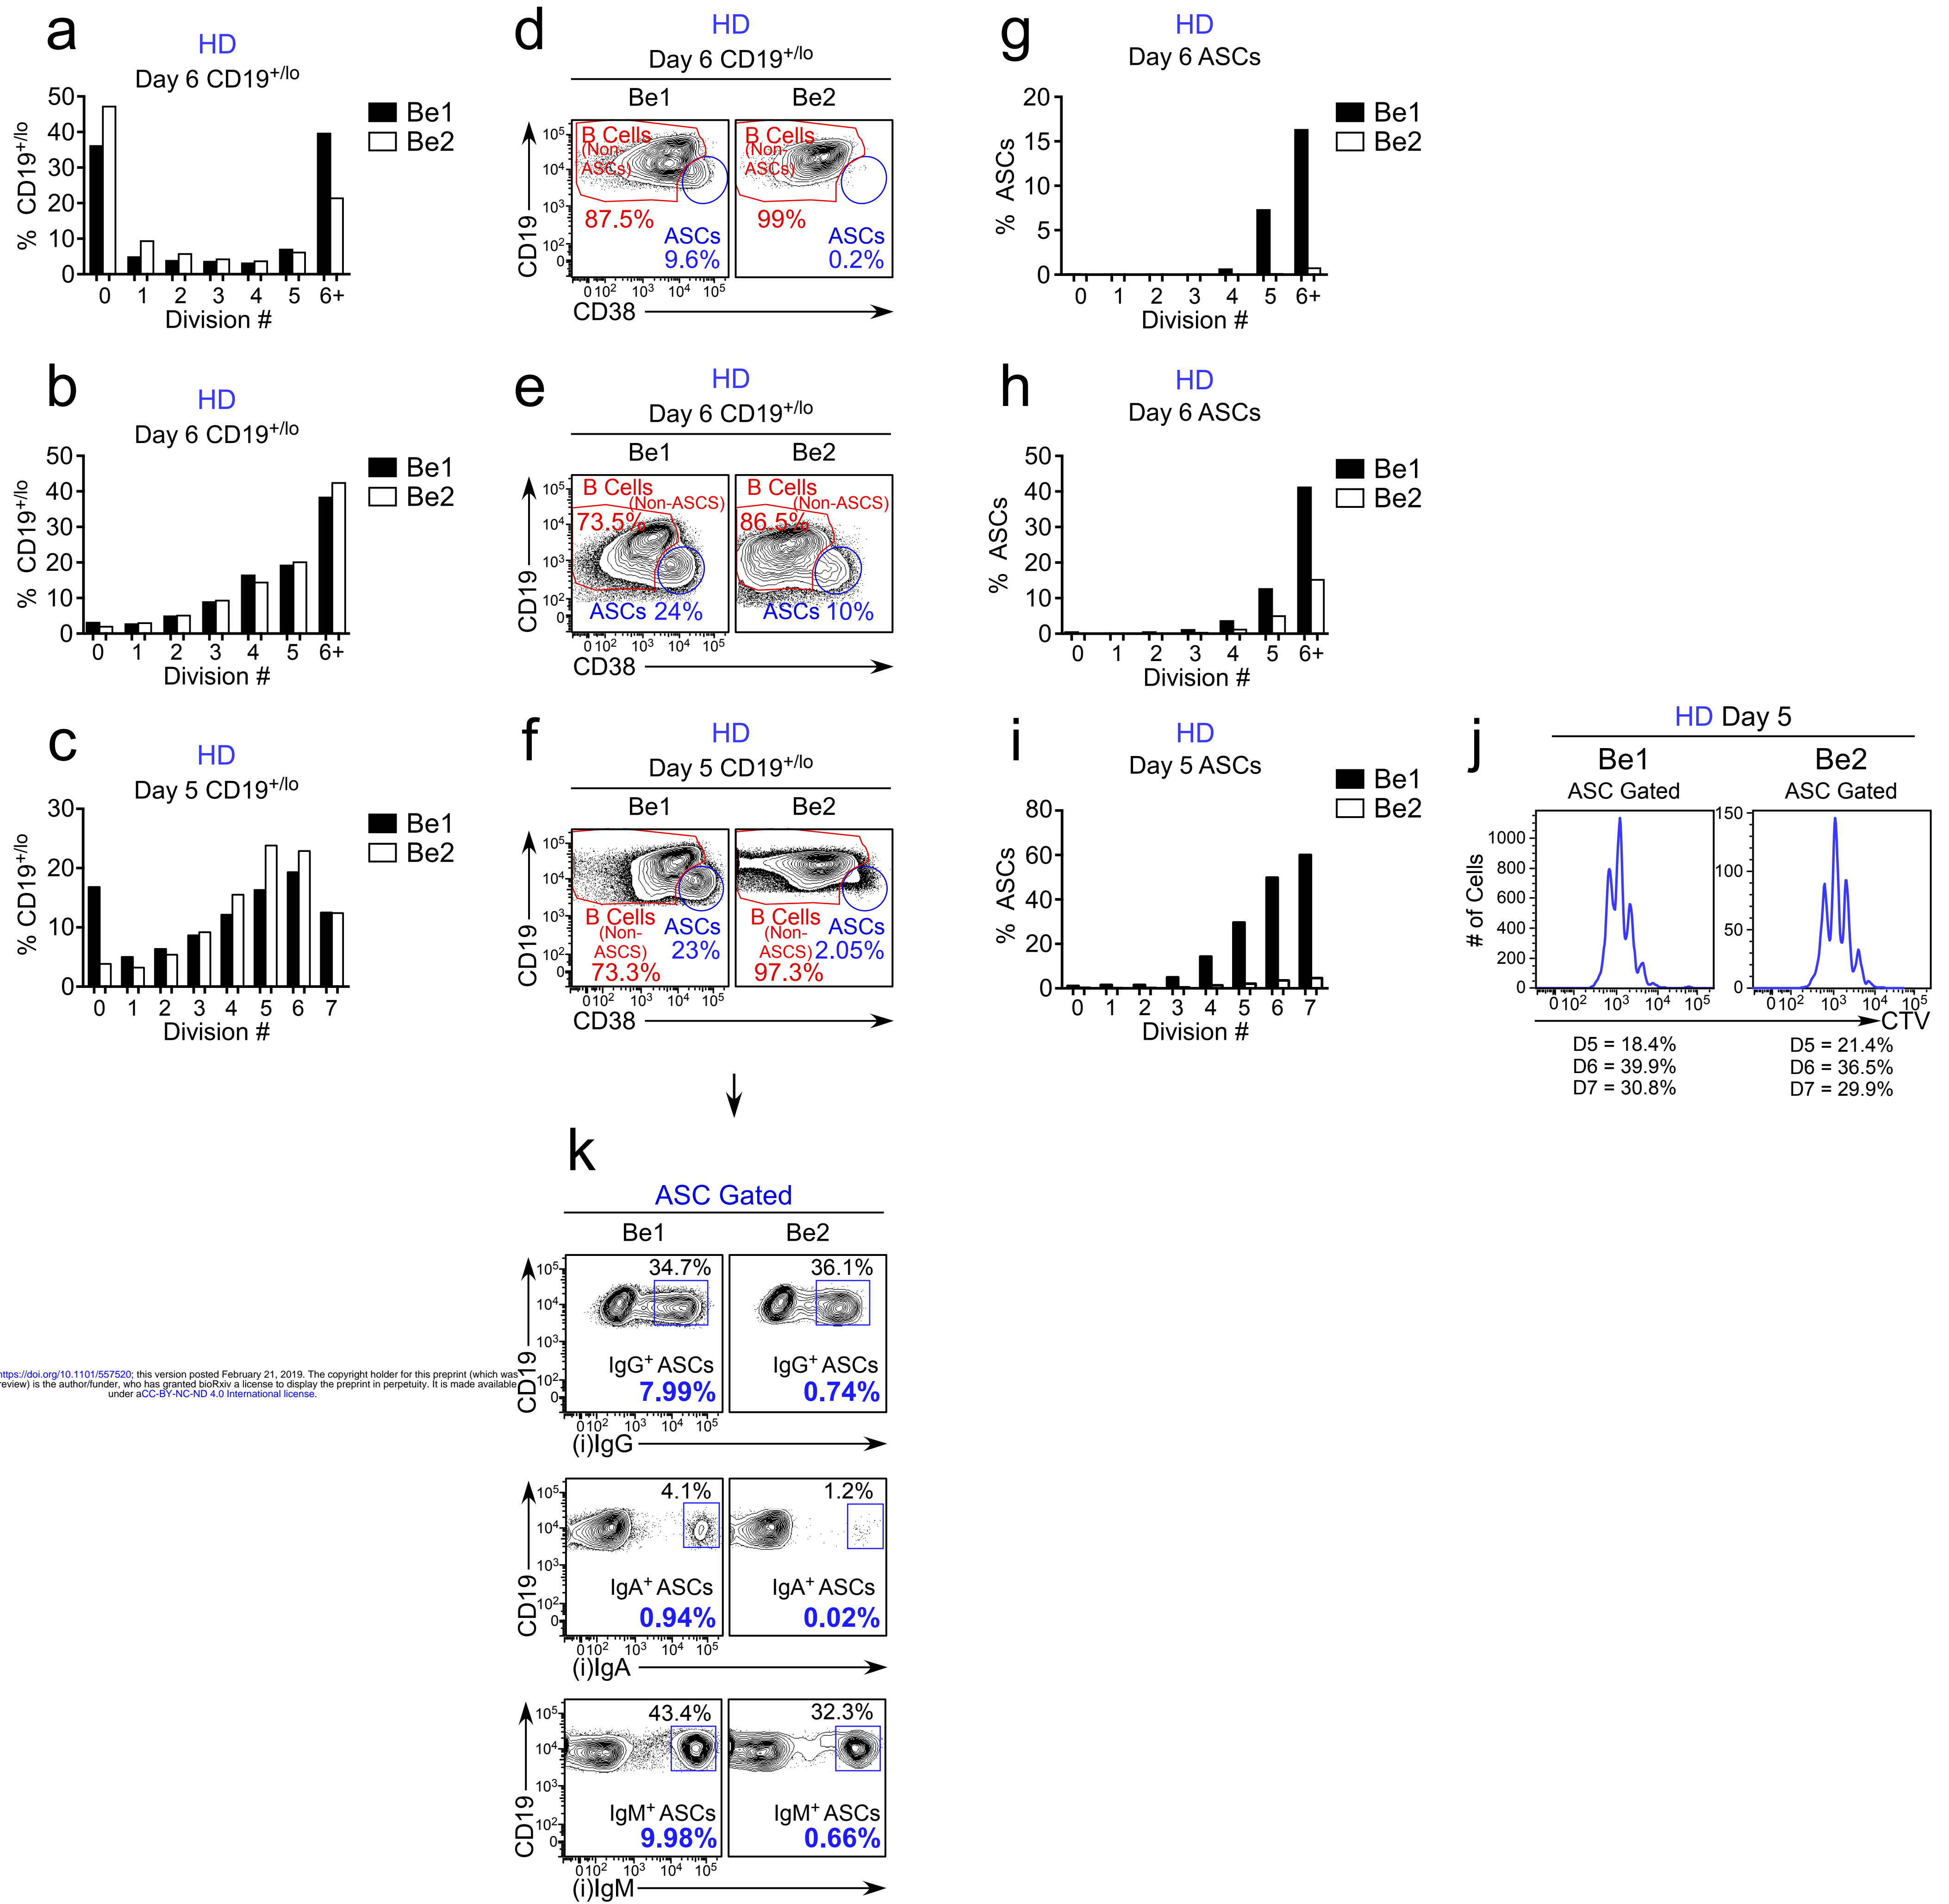

Source: https://www.biorxiv.org/content/10.1101/557520v1.full.pdf
