# Supplementary material for: IFNγ induces epigenetic programming of human T-bethi B cells and promotesTLR7/8 and IL-21 induced differentiation
Source: bioRxiv preprint, doi:10.1101/557520, version 1 (2019-02-21)
Supplement: Supplemental Table 5 [file 557520_file06.xlsx]

## Sheet: Sheet1
	Two-sided Student's T-test
			TBET	IRF4	BLIMP1	p65	REL	STAT5
			P value	P value	P value	P value	P value	P value
	Be.0 v	Be.IL2	0.05	0.55	0.9119	< 2.2e-16	1.156e-14	< 2.2e-16
		Be.g	< 2.2e-16	< 2.2e-16	< 2.2e-16	< 2.2e-16	< 2.2e-16	< 2.2e-16
		Be.g2	< 2.2e-16	< 2.2e-16	< 2.2e-16	< 2.2e-16	< 2.2e-16	< 2.2e-16
	Be.g v	Be.IL2	< 2.2e-16	< 2.2e-16	< 2.2e-16	0.037	0.306	< 2.2e-16
		Be.g2	< 2.2e-16	< 2.2e-16	< 2.2e-16	< 2.2e-16	< 2.2e-16	< 2.2e-16
	Be.g2 v	Be.IL2	< 2.2e-16	< 2.2e-16	< 2.2e-16	< 2.2e-16	< 2.2e-16	< 2.2e-16
