# Supplementary material for: IFNγ induces epigenetic programming of human T-bethi B cells and promotesTLR7/8 and IL-21 induced differentiation
Source: bioRxiv preprint, doi:10.1101/557520, version 1 (2019-02-21)
Supplement: Supplemental Table3 [file 557520_file04.xlsx]

## Sheet: diff.significant.glm.ATACseq
peak	chr	start	end	strand	Annotation	Distance to TSS	Entrez.ID	Symbol	Be.IFNg.v.Be0.logFC	Be.IFNg.v.Be0.fdr	Be.IFNg.v.Be0.sig	Be.IL2.v.Be0.logFC	Be.IL2.v.Be0.fdr	Be.IL2.v.Be0.sig	Be.g2.v.Be0.logFC	Be.g2.v.Be0.fdr	Be.g2.v.Be0.sig	Be.IL2.v.Be.IFNg.logFC	Be.IL2.v.Be.IFNg.fdr	Be.IL2.v.Be.IFNg.sig	Be.g2.v.Be.IFNg.logFC	Be.g2.v.Be.IFNg.fdr	Be.g2.v.Be.IFNg.sig	Be.g2.v.Be.IL2.logFC	Be.g2.v.Be.IL2.fdr	Be.g2.v.Be.IL2.sig
chr14_50736931_50737342	chr14	50736931	50737342	+	intron (NM_182946, intron 27 of 29)	-68783	60485	SAV1	7.96945	9.01313e-14	TRUE	2.99399	0.431269	FALSE	8.40697	5.94222e-19	TRUE	-4.97546	6.3535e-14	TRUE	0.437522	0.495086	FALSE	5.41298	6.81082e-20	TRUE
chr13_39016110_39016426	chr13	39016110	39016426	+	intron (NM_025138, intron 10 of 12)	21808	80209	PROSER1	7.41731	3.82218e-10	TRUE	0	1	FALSE	8.31533	1.12079e-18	TRUE	-7.41731	3.78501e-12	TRUE	0.898026	0.104046	FALSE	8.31533	1.02476e-22	TRUE
chr22_31537020_31537422	chr22	31537020	31537422	+	intron (NM_001007467, intron 4 of 32)	41082	9814	SFI1	7.40012	4.77997e-09	TRUE	3.89877	0.22388	FALSE	8.31439	1.45379e-15	TRUE	-3.50136	6.94742e-07	TRUE	0.914262	0.199824	FALSE	4.41562	6.89707e-14	TRUE
chr1_15712174_15712598	chr1	15712174	15712598	+	intron (NM_015164, intron 1 of 19)	-23928	284723	SLC25A34	8.4258	1.17949e-17	TRUE	4.66627	0.0802537	FALSE	8.27947	4.29357e-17	TRUE	-3.75953	3.04837e-14	TRUE	-0.146334	0.862767	FALSE	3.61319	1.71858e-13	TRUE
chr9_106983394_106983678	chr9	106983394	106983678	+	intron (NR_126029, intron 4 of 4)	119452	340512	LOC340512	7.78298	2.63269e-12	TRUE	5.41764	0.013552	TRUE	7.60977	8.35104e-12	TRUE	-2.36535	2.18588e-06	TRUE	-0.173218	0.858368	FALSE	2.19213	8.98011e-06	TRUE
chr12_11576274_11576466	chr12	11576274	11576466	+	Intergenic	28340	338817	LINC01252	7.6154	9.97071e-12	TRUE	5.01511	0.0378399	TRUE	7.80132	4.57004e-14	TRUE	-2.60029	5.12165e-07	TRUE	0.185913	0.829323	FALSE	2.78621	3.83448e-09	TRUE
chr10_88126697_88127015	chr10	88126697	88127015	+	Intergenic	263418	5728	PTEN	7.29785	7.2741e-09	TRUE	2.99352	0.432221	FALSE	8.01105	4.32765e-14	TRUE	-4.30433	3.91459e-08	TRUE	0.71319	0.337514	FALSE	5.01752	4.72814e-14	TRUE
chr2_67384207_67384569	chr2	67384207	67384569	+	Intergenic	-12922	54465	ETAA1	7.45438	9.73034e-11	TRUE	3.51677	0.305638	FALSE	7.11623	2.7948e-09	TRUE	-3.93761	1.78053e-09	TRUE	-0.338149	0.695481	FALSE	3.59946	9.13384e-08	TRUE
chr4_184849319_184849549	chr4	184849319	184849549	+	intron (NR_132989, intron 2 of 2)	1676	100500818	MIR3945	6.97207	8.0978e-08	TRUE	6.14233	0.00047875	TRUE	7.94018	2.44781e-15	TRUE	-0.829741	0.228485	FALSE	0.968107	0.109481	FALSE	1.79785	5.01414e-06	TRUE
chr5_38121451_38121738	chr5	38121451	38121738	+	intron (NR_147009, intron 2 of 2)	-26886	101929745	LINC02119	7.3839	3.57582e-10	TRUE	4.66533	0.0781058	FALSE	7.6697	5.52413e-13	TRUE	-2.71857	2.04864e-06	TRUE	0.285798	0.735515	FALSE	3.00437	3.75614e-09	TRUE
chr10_110035635_110035865	chr10	110035635	110035865	+	intron (NM_001121, intron 1 of 13)	-27369	100505933	ADD3-AS1	7.45556	1.86472e-10	TRUE	2.16402	0.612707	FALSE	7.85408	2.99581e-14	TRUE	-5.29153	5.54895e-11	TRUE	0.398529	0.593045	FALSE	5.69006	1.63158e-15	TRUE
chr7_99106953_99107212	chr7	99106953	99107212	+	intron (NM_181349, intron 1 of 17)	37038	57154	SMURF1	7.31022	1.49647e-09	TRUE	5.01576	0.0382212	TRUE	7.46299	3.33924e-11	TRUE	-2.29446	5.56364e-05	TRUE	0.152774	0.885088	FALSE	2.44723	2.16943e-06	TRUE
chr2_174835788_174836131	chr2	174835788	174836131	+	intron (NM_001025201, intron 7 of 12)	11659	1123	CHN1	7.30928	3.83618e-09	TRUE	4.85027	0.0562927	FALSE	7.8245	4.161e-13	TRUE	-2.45901	5.00141e-05	TRUE	0.515224	0.512804	FALSE	2.97424	9.80718e-09	TRUE
chr2_60954122_60954452	chr2	60954122	60954452	+	intron (NM_001322127, intron 11 of 16)	62925	150962	PUS10	7.15131	1.06661e-08	TRUE	3.9003	0.21921	FALSE	8.18721	9.40236e-18	TRUE	-3.25101	1.54159e-06	TRUE	1.0359	0.0617971	FALSE	4.28691	1.4742e-16	TRUE
chr15_43779255_43779388	chr15	43779255	43779388	+	intron (NM_001199877, intron 1 of 4)	-2017	80237	ELL3	7.10878	2.28032e-08	TRUE	4.85054	0.0549769	FALSE	7.2764	6.74459e-10	TRUE	-2.25824	0.000266141	TRUE	0.167617	0.882311	FALSE	2.42586	1.34445e-05	TRUE
chr2_8168416_8168670	chr2	8168416	8168670	+	intron (NR_034135, intron 7 of 8)	159876	339789	LINC00299	7.10817	2.06284e-08	TRUE	3.9002	0.219499	FALSE	7.76898	1.61516e-13	TRUE	-3.20797	3.08892e-06	TRUE	0.660812	0.348871	FALSE	3.86878	1.04706e-11	TRUE
chr17_59572574_59572914	chr17	59572574	59572914	+	intron (NM_024612, intron 3 of 17)	7219	79665	DHX40	6.71091	1.10697e-06	TRUE	5.16291	0.0266508	TRUE	7.75058	1.17014e-13	TRUE	-1.548	0.0268728	TRUE	1.03967	0.109012	FALSE	2.58767	2.83191e-08	TRUE
chr7_18740563_18741001	chr7	18740563	18741001	+	intron (NM_058176, intron 12 of 22)	231509	9734	HDAC9	7.06487	2.51102e-08	TRUE	3.51674	0.305777	FALSE	7.4349	3.05314e-11	TRUE	-3.54814	8.56297e-07	TRUE	0.370024	0.66976	FALSE	3.91816	5.555e-10	TRUE
chr10_63227301_63227638	chr10	63227301	63227638	+	intron (NM_001322252, intron 2 of 24)	41754	221037	JMJD1C	7.0635	3.17697e-08	TRUE	5.7343	0.00408438	TRUE	7.2349	8.88566e-10	TRUE	-1.3292	0.0284904	TRUE	0.171398	0.877778	FALSE	1.5006	0.00311792	TRUE
chr16_89020356_89020677	chr16	89020356	89020677	+	Intergenic	-43420	863	CBFA2T3	7.02241	6.53145e-08	TRUE	4.66482	0.0792132	FALSE	7.92376	1.27186e-14	TRUE	-2.35759	0.000284608	TRUE	0.901351	0.167957	FALSE	3.25894	7.49136e-11	TRUE
chr1_198202445_198202689	chr1	198202445	198202689	+	intron (NM_133494, intron 1 of 9)	45589	140609	NEK7	6.52648	6.32318e-06	TRUE	4.85083	0.0547717	FALSE	7.64742	1.68982e-12	TRUE	-1.67565	0.0298241	TRUE	1.12094	0.107317	FALSE	2.79659	3.9579e-08	TRUE
chr1_212237700_212237964	chr1	212237700	212237964	+	intron (NR_125984, intron 2 of 3)	-3096	101929541	LOC101929541	7.51874	1.06605e-10	TRUE	5.53284	0.00894192	TRUE	7.62186	4.19965e-12	TRUE	-1.98591	0.000131756	TRUE	0.103115	0.921622	FALSE	2.08902	1.17891e-05	TRUE
chr8_21949002_21949351	chr8	21949002	21949351	+	intron (NM_015024, intron 1 of 27)	29507	23039	XPO7	6.76754	5.76272e-07	TRUE	3.89994	0.218845	FALSE	7.61561	1.02155e-12	TRUE	-2.86761	0.000104492	TRUE	0.848068	0.216902	FALSE	3.71567	7.51474e-11	TRUE
chr2_118049834_118050149	chr2	118049834	118050149	+	Intergenic	-35828	54520	CCDC93	7.01989	6.23417e-08	TRUE	5.01449	0.0385496	TRUE	7.67811	1.14758e-12	TRUE	-2.00541	0.00144781	TRUE	0.658219	0.37533	FALSE	2.66363	8.39799e-08	TRUE
chr7_66148568_66148948	chr7	66148568	66148948	+	intron (NM_001040647, intron 4 of 4)	33940	27297	CRCP	6.82151	3.40427e-07	TRUE	3.51677	0.305638	FALSE	7.55822	2.97847e-12	TRUE	-3.30474	1.54238e-05	TRUE	0.736714	0.303986	FALSE	4.04146	3.93784e-11	TRUE
chr2_98029832_98030016	chr2	98029832	98030016	+	Intergenic	-34033	23505	TMEM131	7.0198	4.77945e-08	TRUE	3.90019	0.219016	FALSE	7.50031	1.30465e-11	TRUE	-3.1196	7.46586e-06	TRUE	0.480513	0.55064	FALSE	3.60012	1.27723e-09	TRUE
chr1_55169232_55169466	chr1	55169232	55169466	+	intron (NM_015306, intron 5 of 67)	46017	23358	USP24	6.97001	1.76172e-07	TRUE	5.01494	0.039683	TRUE	7.50458	6.08993e-11	TRUE	-1.95507	0.00330081	TRUE	0.534572	0.540224	FALSE	2.48964	3.69229e-06	TRUE
chr17_17853846_17854030	chr17	17853846	17854030	+	intron (NM_001033551, intron 11 of 13)	-16927	6720	SREBF1	7.61574	7.83977e-12	TRUE	4.66531	0.0779785	FALSE	7.52952	6.3673e-12	TRUE	-2.95043	4.14676e-08	TRUE	-0.0862209	0.930424	FALSE	2.86421	4.43312e-08	TRUE
chr7_43735821_43736195	chr7	43735821	43736195	+	Intergenic	-6467	55744	COA1	6.96979	1.05164e-07	TRUE	3.89996	0.219559	FALSE	7.76972	1.9569e-13	TRUE	-3.06982	1.76914e-05	TRUE	0.799928	0.244719	FALSE	3.86975	1.29163e-11	TRUE
chr11_80847043_80847300	chr11	80847043	80847300	+	Intergenic	-84368	101928944	LOC101928944	6.87275	2.58157e-07	TRUE	3.51706	0.306071	FALSE	7.84496	2.66035e-14	TRUE	-3.35569	1.13146e-05	TRUE	0.972212	0.12928	FALSE	4.3279	1.78959e-13	TRUE
chr8_128095886_128096108	chr8	128095886	128096108	+	intron (NR_003367, intron 6 of 8)	46845	100302175	MIR1207	7.08922	1.84167e-07	TRUE	2.16337	0.613641	FALSE	7.49076	9.50038e-10	TRUE	-4.92585	2.17197e-07	TRUE	0.401545	0.721093	FALSE	5.32739	5.63836e-10	TRUE
chr14_71023009_71023266	chr14	71023009	71023266	+	intron (NM_014982, intron 12 of 35)	115732	22990	PCNX1	7.61353	1.44501e-11	TRUE	2.16403	0.612707	FALSE	7.46866	3.06813e-11	TRUE	-5.4495	2.41707e-12	TRUE	-0.144873	0.885508	FALSE	5.30463	6.2632e-12	TRUE
chr10_8069186_8069462	chr10	8069186	8069462	+	intron (NM_001002295, intron 4 of 5)	14620	2625	GATA3	6.97224	6.70327e-08	TRUE	2.99349	0.430682	FALSE	7.46751	1.46846e-11	TRUE	-3.97876	4.67412e-07	TRUE	0.495263	0.528254	FALSE	4.47402	3.03972e-11	TRUE
chrX_109774789_109775101	chrX	109774789	109775101	+	Intergenic	-41542	2182	ACSL4	7.19267	4.78434e-09	TRUE	3.89999	0.218921	FALSE	7.46749	1.69486e-11	TRUE	-3.29268	6.58716e-07	TRUE	0.274825	0.762796	FALSE	3.5675	1.68167e-09	TRUE
chr7_50448951_50449089	chr7	50448951	50449089	+	intron (NM_001287496, intron 1 of 3)	1386	63979	FIGNL1	6.82252	3.98713e-07	TRUE	5.01483	0.0379312	TRUE	7.22942	8.42505e-10	TRUE	-1.80769	0.00681195	TRUE	0.406901	0.666358	FALSE	2.21459	4.31556e-05	TRUE
chr7_69804208_69804529	chr7	69804208	69804529	+	intron (NM_001127232, intron 1 of 4)	205449	26053	AUTS2	6.82105	4.08455e-07	TRUE	5.6363	0.00594068	TRUE	7.55496	5.65764e-12	TRUE	-1.18476	0.0840333	FALSE	0.733908	0.323685	FALSE	1.91866	3.42761e-05	TRUE
chr5_65190351_65190876	chr5	65190351	65190876	+	intron (NM_197941, intron 21 of 24)	291307	11174	ADAMTS6	6.76834	6.70642e-07	TRUE	4.20236	0.155301	FALSE	8.02674	3.62086e-16	TRUE	-2.56599	0.000381155	TRUE	1.2584	0.0275827	TRUE	3.82439	5.76313e-14	TRUE
chr18_51083507_51083730	chr18	51083507	51083730	+	3' UTR (NM_005359, exon 12 of 12)	53405	4089	SMAD4	7.193	4.39688e-09	TRUE	4.20241	0.15484	FALSE	7.43603	2.49675e-11	TRUE	-2.99059	2.29265e-06	TRUE	0.243023	0.79475	FALSE	3.23361	1.22077e-08	TRUE
chr5_65172543_65172826	chr5	65172543	65172826	+	intron (NM_197941, intron 23 of 24)	309236	11174	ADAMTS6	6.76757	5.76272e-07	TRUE	4.45232	0.109973	FALSE	6.99161	1.36579e-08	TRUE	-2.31525	0.000893964	TRUE	0.224042	0.845438	FALSE	2.53929	3.08067e-05	TRUE
chr1_197962045_197962231	chr1	197962045	197962231	+	Intergenic	44751	56956	LHX9	6.76716	7.41142e-07	TRUE	4.20232	0.15566	FALSE	7.40994	7.43295e-11	TRUE	-2.56484	0.000418991	TRUE	0.642778	0.430908	FALSE	3.20762	4.08469e-08	TRUE
chr8_134324886_134325102	chr8	134324886	134325102	+	Intergenic	-273077	594840	ZFAT-AS1	6.76622	8.36284e-07	TRUE	4.2026	0.156012	FALSE	7.38025	1.58913e-10	TRUE	-2.56363	0.000470803	TRUE	0.614023	0.466265	FALSE	3.17765	9.03107e-08	TRUE
chr10_114825429_114825701	chr10	114825429	114825701	+	intron (NM_020940, intron 1 of 16)	3821	57700	FAM160B1	6.76671	6.65968e-07	TRUE	3.51695	0.305919	FALSE	7.30071	2.8859e-10	TRUE	-3.24976	3.26515e-05	TRUE	0.533999	0.532018	FALSE	3.78376	7.22002e-09	TRUE
chr6_231880_232048	chr6	231880	232048	+	Intergenic	-26480	285766	LOC285766	6.71151	9.93144e-07	TRUE	4.45234	0.109973	FALSE	7.74989	7.00641e-14	TRUE	-2.25917	0.00150035	TRUE	1.03838	0.102706	FALSE	3.29755	1.04864e-10	TRUE
chr13_29793720_29793907	chr13	29793720	29793907	+	intron (NM_007106, intron 1 of 4)	56870	5412	UBL3	6.71367	1.24943e-06	TRUE	4.20255	0.15569	FALSE	7.33315	2.41894e-10	TRUE	-2.51112	0.000703397	TRUE	0.619475	0.462036	FALSE	3.1306	1.39571e-07	TRUE
chr2_230288083_230288429	chr2	230288083	230288429	+	intron (NM_001278451, intron 17 of 25)	-38915	93349	SP140L	6.76795	1.15036e-06	TRUE	4.20339	0.157046	FALSE	7.32581	7.99116e-10	TRUE	-2.56456	0.000642873	TRUE	0.55786	0.548497	FALSE	3.12242	5.08638e-07	TRUE
chr3_186538946_186539046	chr3	186538946	186539046	+	intron (NM_017541, intron 2 of 2)	5455	1427	CRYGS	7.10854	1.37995e-08	TRUE	4.45233	0.110096	FALSE	7.30202	2.20373e-10	TRUE	-2.65621	2.42511e-05	TRUE	0.193485	0.853312	FALSE	2.84969	4.81458e-07	TRUE
chr5_134111799_134112036	chr5	134111799	134112036	+	Intergenic	-2781	6932	TCF7	6.7115	9.93144e-07	TRUE	4.45233	0.109973	FALSE	7.98589	3.69268e-16	TRUE	-2.25917	0.00150035	TRUE	1.27439	0.0228595	TRUE	3.53356	3.15639e-13	TRUE
chr12_48751059_48751252	chr12	48751059	48751252	+	intron (NM_001351125, intron 2 of 4)	20882	100616262	MIR4701	6.70566	1.68588e-06	TRUE	3.89998	0.220283	FALSE	7.29623	7.40823e-10	TRUE	-2.80568	0.000314902	TRUE	0.590571	0.508413	FALSE	3.39625	1.08404e-07	TRUE
chr5_36889382_36889593	chr5	36889382	36889593	+	intron (NM_015384, intron 1 of 45)	12728	25836	NIPBL	6.33839	4.60309e-05	TRUE	4.66488	0.0822549	FALSE	7.27836	3.90819e-09	TRUE	-1.67351	0.0637495	FALSE	0.939973	0.321255	FALSE	2.61348	2.46742e-05	TRUE
chr17_78377443_78377626	chr17	78377443	78377626	+	Intergenic	-1084	9489	PGS1	6.71147	9.93144e-07	TRUE	4.66526	0.077755	FALSE	7.11616	2.79497e-09	TRUE	-2.0462	0.0034747	TRUE	0.40469	0.67636	FALSE	2.45089	1.96703e-05	TRUE
chr7_137895657_137895851	chr7	137895657	137895851	+	intron (NM_194071, intron 8 of 11)	37234	64764	CREB3L2	5.66677	0.00122026	TRUE	3.89977	0.219375	FALSE	7.27189	5.2912e-10	TRUE	-1.767	0.123413	FALSE	1.60512	0.0473587	TRUE	3.37212	7.40785e-08	TRUE
chr5_68641301_68641588	chr5	68641301	68641588	+	Intergenic	348876	5295	PIK3R1	6.65317	1.71476e-06	TRUE	3.51676	0.305638	FALSE	7.43606	2.49675e-11	TRUE	-3.13641	8.88835e-05	TRUE	0.782895	0.295845	FALSE	3.91931	4.34136e-10	TRUE
chr2_181128298_181128488	chr2	181128298	181128488	+	intron (NR_130784, intron 1 of 4)	4556	101927156	LINC01934	6.5924	2.94366e-06	TRUE	4.45233	0.109973	FALSE	7.26718	3.44991e-10	TRUE	-2.14007	0.0039763	TRUE	0.674778	0.413576	FALSE	2.81485	7.52184e-07	TRUE
chr4_48153734_48154149	chr4	48153734	48154149	+	intron (NM_003215, intron 9 of 17)	-19685	7294	TXK	7.19298	4.39688e-09	TRUE	3.51677	0.305638	FALSE	7.26718	3.44991e-10	TRUE	-3.67621	1.19091e-07	TRUE	0.0741978	0.94929	FALSE	3.75041	8.6765e-09	TRUE
chr4_151052389_151052695	chr4	151052389	151052695	+	Intergenic	-37045	987	LRBA	6.7115	9.93144e-07	TRUE	3.51676	0.305638	FALSE	7.26718	3.44991e-10	TRUE	-3.19473	4.95698e-05	TRUE	0.555679	0.508413	FALSE	3.75041	8.6765e-09	TRUE
chr1_246591560_246591852	chr1	246591560	246591852	+	exon (NM_001139459, exon 2 of 9)	25369	163882	CNST	6.65053	2.29698e-06	TRUE	4.66517	0.078943	FALSE	7.5338	1.32788e-11	TRUE	-1.98536	0.00689727	TRUE	0.883264	0.238854	FALSE	2.86863	9.13384e-08	TRUE
chr10_81709001_81709224	chr10	81709001	81709224	+	Intergenic	-166202	10718	NRG3	6.64877	2.55834e-06	TRUE	2.9935	0.431222	FALSE	7.07106	1.03034e-08	TRUE	-3.65527	3.07706e-05	TRUE	0.42229	0.686329	FALSE	4.07756	6.77231e-08	TRUE
chr1_39412162_39412356	chr1	39412162	39412356	+	exon (NM_015038, exon 1 of 1)	2755	643314	KIAA0754	6.52868	5.2941e-06	TRUE	3.51674	0.305777	FALSE	7.1544	1.89137e-09	TRUE	-3.01194	0.000300124	TRUE	0.625718	0.477174	FALSE	3.63766	5.92222e-08	TRUE
chr2_136029237_136029478	chr2	136029237	136029478	+	Intergenic	-43673	1615	DARS	5.98321	0.000240515	TRUE	5.41922	0.0126619	TRUE	7.22911	7.69466e-10	TRUE	-0.563991	0.653477	FALSE	1.2459	0.12324	FALSE	1.80989	0.000451426	TRUE
chr9_97166607_97167020	chr9	97166607	97167020	+	intron (NR_136286, intron 14 of 17)	-71613	57653	SUGT1P4-STRA6LP-CCDC180	6.9721	7.87524e-08	TRUE	6.46004	5.61033e-05	TRUE	7.22909	7.70483e-10	TRUE	-0.512061	0.524124	FALSE	0.256996	0.802512	FALSE	0.769057	0.118112	FALSE
chr5_159366888_159367125	chr5	159366888	159367125	+	Intergenic	35488	285626	LOC285626	6.16421	9.00796e-05	TRUE	2.16398	0.612805	FALSE	7.20098	1.89164e-09	TRUE	-4.00022	0.000294574	TRUE	1.03677	0.224178	FALSE	5.03699	9.43643e-10	TRUE
chr5_126788540_126788778	chr5	126788540	126788778	+	intron (NR_134488, intron 1 of 11)	11506	4001	LMNB1	6.5285	5.31932e-06	TRUE	3.89989	0.218921	FALSE	7.19433	1.12092e-09	TRUE	-2.62862	0.00100487	TRUE	0.66583	0.439827	FALSE	3.29445	1.65107e-07	TRUE
chr15_65857836_65858026	chr15	65857836	65858026	+	Intergenic	-11528	8766	RAB11A	6.59241	2.94366e-06	TRUE	2.99349	0.430682	FALSE	7.19366	9.89741e-10	TRUE	-3.59892	3.56486e-05	TRUE	0.601248	0.484896	FALSE	4.20017	4.27063e-09	TRUE
chr11_75766552_75766750	chr11	75766552	75766750	+	intron (NR_046090, intron 1 of 3)	1996	283214	LOC283214	7.61887	1.62574e-11	TRUE	3.90023	0.219541	FALSE	7.15571	3.01436e-09	TRUE	-3.71864	1.44101e-09	TRUE	-0.463165	0.562225	FALSE	3.25547	5.09917e-07	TRUE
chr11_96357936_96358142	chr11	96357936	96358142	+	intron (NM_001318736, intron 10 of 10)	-14859	84441	MAML2	6.76756	5.76272e-07	TRUE	4.45233	0.109973	FALSE	7.15546	1.67192e-09	TRUE	-2.31523	0.000893964	TRUE	0.387906	0.686792	FALSE	2.70314	3.79355e-06	TRUE
chr9_90873032_90873279	chr9	90873032	90873279	+	intron (NM_003177, intron 7 of 13)	45735	6850	SYK	6.24292	4.49445e-05	TRUE	2.99349	0.430682	FALSE	7.15543	1.67192e-09	TRUE	-3.24944	0.000736726	TRUE	0.912504	0.272859	FALSE	4.16194	7.83222e-09	TRUE
chr16_11285965_11286191	chr16	11285965	11286191	+	Intergenic	-4743	5619	PRM1	6.82152	3.40427e-07	TRUE	4.66528	0.077755	FALSE	7.15536	1.67193e-09	TRUE	-2.15624	0.00133963	TRUE	0.333835	0.737955	FALSE	2.49008	1.17872e-05	TRUE
chr8_42887711_42887894	chr8	42887711	42887894	+	exon (NM_001160224, exon 2 of 6)	8473	100616115	MIR4469	6.46073	1.30708e-05	TRUE	4.85087	0.0558092	FALSE	7.35604	4.1245e-10	TRUE	-1.60986	0.0484239	TRUE	0.895309	0.287445	FALSE	2.50517	8.25672e-06	TRUE
chr5_157222572_157222877	chr5	157222572	157222877	+	intron (NM_005546, intron 5 of 16)	41828	3702	ITK	5.88595	0.000410155	TRUE	5.53155	0.00857261	TRUE	7.15422	2.08268e-09	TRUE	-0.354405	0.805857	FALSE	1.26826	0.128246	FALSE	1.62267	0.00188739	TRUE
chr2_87501778_87501925	chr2	87501778	87501925	+	intron (NR_146461, intron 2 of 2)	31901	112597	CYTOR	7.15285	1.0069e-08	TRUE	2.16422	0.612691	FALSE	7.15363	2.35049e-09	TRUE	-4.98864	5.56201e-09	TRUE	0.000778743	0.999253	FALSE	4.98942	1.20057e-09	TRUE
chr12_10293211_10293405	chr12	10293211	10293405	+	intron (NM_001351060, intron 2 of 8)	-11138	3824	KLRD1	5.8856	0.000426865	TRUE	3.51667	0.306143	FALSE	7.12233	4.14819e-09	TRUE	-2.36893	0.0241211	TRUE	1.23673	0.154561	FALSE	3.60566	1.45316e-07	TRUE
chr14_102708615_102708836	chr14	102708615	102708836	+	intron (NM_015156, intron 6 of 11)	-68754	7187	TRAF3	6.46009	1.10303e-05	TRUE	5.4199	0.0130547	TRUE	7.26899	7.11151e-10	TRUE	-1.04019	0.222373	FALSE	0.808906	0.340602	FALSE	1.8491	0.00040449	TRUE
chr4_102580567_102580743	chr4	102580567	102580743	+	intron (NM_001165412, intron 9 of 23)	-78169	105377621	LOC105377621	6.39301	1.50539e-05	TRUE	2.16414	0.61267	FALSE	6.90214	3.90486e-08	TRUE	-4.22887	3.5998e-05	TRUE	0.509128	0.616817	FALSE	4.738	3.35843e-08	TRUE
chr8_39964281_39964413	chr8	39964281	39964413	+	intron (NM_194294, intron 3 of 10)	29392	169355	IDO2	6.65299	1.86724e-06	TRUE	4.45242	0.110282	FALSE	7.11419	3.44893e-09	TRUE	-2.20057	0.00264222	TRUE	0.461192	0.629679	FALSE	2.66176	7.85432e-06	TRUE
chr5_14356362_14356576	chr5	14356362	14356576	+	intron (NR_134469, intron 11 of 56)	-107514	109623458	SNORD170	6.87608	2.92852e-07	TRUE	3.51694	0.306439	FALSE	7.08338	8.18349e-09	TRUE	-3.35914	1.32521e-05	TRUE	0.207298	0.85839	FALSE	3.56644	3.18211e-07	TRUE
chr1_174174684_174174988	chr1	174174684	174174988	+	intron (NM_014857, intron 1 of 20)	15422	9910	RABGAP1L	5.8858	0.000398216	TRUE	3.89995	0.218845	FALSE	7.0759	4.7655e-09	TRUE	-1.98585	0.0522053	FALSE	1.1901	0.165299	FALSE	3.17595	8.11199e-07	TRUE
chr3_188253447_188253641	chr3	188253447	188253641	+	intron (NM_005578, intron 2 of 10)	28139	4026	LPP	6.39263	1.67349e-05	TRUE	2.16407	0.612691	FALSE	7.26341	5.25724e-10	TRUE	-4.22856	4.05296e-05	TRUE	0.870786	0.287445	FALSE	5.09935	1.90552e-10	TRUE
chr7_69762948_69763443	chr7	69762948	69763443	+	intron (NM_001127232, intron 1 of 4)	164276	26053	AUTS2	6.31951	1.53572e-18	TRUE	1.67589	0.493455	FALSE	6.89988	1.74715e-26	TRUE	-4.64361	1.08921e-18	TRUE	0.580373	0.30922	FALSE	5.22399	2.5196e-27	TRUE
chr8_99680311_99680594	chr8	99680311	99680594	+	intron (NM_017890, intron 35 of 61)	-143591	100126309	MIR875	7.01968	4.60974e-08	TRUE	2.16419	0.612691	FALSE	7.03646	9.44999e-09	TRUE	-4.85549	3.36035e-08	TRUE	0.0167791	0.989706	FALSE	4.87227	6.26618e-09	TRUE
chr2_102253217_102253482	chr2	102253217	102253482	+	Intergenic	-58153	9173	IL1RL1	6.52865	5.32039e-06	TRUE	3.89982	0.218921	FALSE	7.03526	8.88814e-09	TRUE	-2.62882	0.00100511	TRUE	0.506612	0.599514	FALSE	3.13543	1.60205e-06	TRUE
chr1_39109761_39109924	chr1	39109761	39109924	+	intron (NM_012090, intron 1 of 92)	25675	23499	MACF1	6.24409	4.79048e-05	TRUE	2.16408	0.612691	FALSE	7.37076	9.88732e-11	TRUE	-4.08001	0.000140507	TRUE	1.12667	0.144382	FALSE	5.20668	2.64024e-11	TRUE
chr2_237901293_237901457	chr2	237901293	237901457	+	intron (NM_001308353, intron 3 of 3)	41831	10267	RAMP1	6.46259	8.70354e-06	TRUE	4.8508	0.0537942	FALSE	7.03433	8.07758e-09	TRUE	-1.61178	0.0380477	TRUE	0.571747	0.539411	FALSE	2.18353	0.000140052	TRUE
chr16_12245245_12245455	chr16	12245245	12245455	+	intron (NM_032167, intron 14 of 20)	268616	92017	SNX29	5.09661	0.00991522	TRUE	2.16413	0.61267	FALSE	7.03433	8.07758e-09	TRUE	-2.93248	0.0583559	FALSE	1.93773	0.0269424	TRUE	4.8702	5.168e-09	TRUE
chr3_67334714_67335026	chr3	67334714	67335026	+	Intergenic	109406	100422941	MIR4272	6.24292	4.49445e-05	TRUE	2.16414	0.61267	FALSE	6.99154	1.36579e-08	TRUE	-4.07879	0.000130401	TRUE	0.748618	0.415845	FALSE	4.8274	9.56561e-09	TRUE
chr3_56292070_56292246	chr3	56292070	56292246	+	intron (NR_132749, intron 3 of 17)	176205	26059	ERC2	5.54387	0.00203136	TRUE	3.89979	0.219002	FALSE	6.99194	1.57387e-08	TRUE	-1.64408	0.177079	FALSE	1.44807	0.104046	FALSE	3.09215	2.94719e-06	TRUE
chr12_11772052_11772215	chr12	11772052	11772215	+	intron (NM_001987, intron 2 of 7)	122279	2120	ETV6	6.24288	4.49445e-05	TRUE	4.45233	0.109973	FALSE	6.90214	3.90486e-08	TRUE	-1.79055	0.0376745	TRUE	0.659254	0.494665	FALSE	2.44981	8.60359e-05	TRUE
chr5_132641520_132641734	chr5	132641520	132641734	+	intron (NM_005732, intron 24 of 24)	163	101927761	TH2LCRR	6.16157	7.77135e-05	TRUE	5.63655	0.00572116	TRUE	6.99161	1.36579e-08	TRUE	-0.525025	0.65321	FALSE	0.830038	0.362706	FALSE	1.35506	0.0120841	TRUE
chr6_37190233_37190435	chr6	37190233	37190435	+	Intergenic	20188	5292	PIM1	6.24292	4.49445e-05	TRUE	2.99349	0.430682	FALSE	6.99161	1.36579e-08	TRUE	-3.24943	0.000736726	TRUE	0.748688	0.415845	FALSE	3.99812	8.82887e-08	TRUE
chr3_71358365_71358490	chr3	71358365	71358490	+	intron (NM_001349340, intron 3 of 19)	-53667	27086	FOXP1	5.54449	0.00199599	TRUE	3.51677	0.305638	FALSE	6.99158	1.36579e-08	TRUE	-2.02772	0.0919338	FALSE	1.44709	0.10189	FALSE	3.47481	5.48506e-07	TRUE
chr9_33306134_33306355	chr9	33306134	33306355	+	intron (NM_147134, intron 4 of 15)	15827	4799	NFX1	6.16156	7.77135e-05	TRUE	4.20241	0.15484	FALSE	7.03423	8.0816e-09	TRUE	-1.95915	0.0292395	TRUE	0.872667	0.325678	FALSE	2.83181	5.56745e-06	TRUE
chr8_31037537_31037703	chr8	31037537	31037703	+	intron (NM_000553, intron 1 of 34)	-3905	29942	PURG	7.3526	1.16022e-09	TRUE	2.16396	0.612825	FALSE	6.94763	4.13161e-08	TRUE	-5.18863	5.04353e-10	TRUE	-0.404971	0.665389	FALSE	4.78366	3.80759e-08	TRUE
chr3_15500079_15500375	chr3	15500079	15500375	+	intron (NM_005677, intron 1 of 16)	-1355	8292	COLQ	6.07906	0.000191658	TRUE	5.63998	0.00693325	TRUE	7.46373	2.42939e-10	TRUE	-0.439083	0.748193	FALSE	1.38467	0.0947057	FALSE	1.82375	0.000563854	TRUE
chr4_86557647_86557842	chr4	86557647	86557842	+	Intergenic	-15192	100616463	MIR4452	5.66742	0.00116499	TRUE	4.45233	0.109973	FALSE	6.94755	2.31206e-08	TRUE	-1.2151	0.307866	FALSE	1.28013	0.158744	FALSE	2.49523	5.14865e-05	TRUE
chr12_50442589_50442943	chr12	50442589	50442943	+	intron (NM_199190, intron 8 of 14)	-13805	106633800	SNORD133	6.07539	0.000133879	TRUE	4.45234	0.109973	FALSE	6.94752	2.31206e-08	TRUE	-1.62306	0.0828976	FALSE	0.872124	0.345399	FALSE	2.49518	5.14865e-05	TRUE
chr4_102849675_102849944	chr4	102849675	102849944	+	intron (NM_181890, intron 1 of 7)	19084	7323	UBE2D3	6.24431	4.84037e-05	TRUE	4.85095	0.0543471	FALSE	6.9025	4.82968e-08	TRUE	-1.39336	0.115224	FALSE	0.658188	0.50376	FALSE	2.05154	0.000681645	TRUE
chr22_21766923_21767396	chr22	21766923	21767396	+	intron (NM_002745, intron 8 of 8)	-31325	29799	YPEL1	6.07664	6.40395e-18	TRUE	2.89368	0.0793843	FALSE	6.21411	1.85732e-20	TRUE	-3.18296	1.84831e-13	TRUE	0.137474	0.86073	FALSE	3.32044	6.75781e-16	TRUE
chr10_97560930_97561100	chr10	97560930	97561100	+	intron (NM_024954, intron 1 of 2)	-11426	26287	ANKRD2	4.69554	0.0287386	TRUE	4.20241	0.15484	FALSE	6.90214	3.90486e-08	TRUE	-0.493135	0.824175	FALSE	2.20659	0.0199313	TRUE	2.69973	2.81061e-05	TRUE
chr5_154351713_154351900	chr5	154351713	154351900	+	intron (NM_198321, intron 4 of 11)	4700	100302181	MIR1294	6.07539	0.000133879	TRUE	4.85079	0.0537942	FALSE	6.85521	6.577e-08	TRUE	-1.2246	0.205765	FALSE	0.77982	0.423529	FALSE	2.00442	0.00090518	TRUE
chr3_65963878_65964053	chr3	65963878	65964053	+	intron (NM_001033057, intron 1 of 22)	-9407	151877	MAGI1-IT1	5.88576	0.000398216	TRUE	5.01514	0.0374505	TRUE	7.03437	8.07758e-09	TRUE	-0.870612	0.451581	FALSE	1.14861	0.187762	FALSE	2.01923	0.000333773	TRUE
chr8_59304894_59305109	chr8	59304894	59305109	+	Intergenic	185791	100505501	LOC100505501	6.32057	2.75983e-05	TRUE	4.20216	0.155207	FALSE	6.90103	4.62625e-08	TRUE	-2.11841	0.0121515	TRUE	0.580468	0.563829	FALSE	2.69887	3.29701e-05	TRUE
chr18_6088504_6088755	chr18	6088504	6088755	+	intron (NM_173464, intron 15 of 19)	-168115	101927150	L3MBTL4-AS1	5.78076	0.00068201	TRUE	3.51677	0.305638	FALSE	6.90214	3.90486e-08	TRUE	-2.264	0.0369986	TRUE	1.12137	0.223757	FALSE	3.38537	1.75626e-06	TRUE
chr17_42340922_42341160	chr17	42340922	42341160	+	intron (NM_139276, intron 4 of 23)	47346	6774	STAT3	6.52966	6.26604e-06	TRUE	5.29541	0.0187259	TRUE	6.89947	5.99634e-08	TRUE	-1.23425	0.11995	FALSE	0.369809	0.745573	FALSE	1.60406	0.00626599	TRUE
chr16_89365164_89365298	chr16	89365164	89365298	+	intron (NR_045839, intron 2 of 9)	44098	100287036	LOC100287036	6.31264	3.75895e-05	TRUE	4.20273	0.156864	FALSE	6.89701	9.19537e-08	TRUE	-2.10991	0.0156435	TRUE	0.584375	0.584311	FALSE	2.69428	6.59582e-05	TRUE
chr2_143949205_143949408	chr2	143949205	143949408	+	intron (NM_001006636, intron 11 of 11)	12239	101928386	LOC101928386	6.16159	7.77135e-05	TRUE	2.99349	0.430682	FALSE	6.85525	6.577e-08	TRUE	-3.1681	0.00133963	TRUE	0.693658	0.479377	FALSE	3.86176	5.59791e-07	TRUE
chr2_173146714_173146925	chr2	173146714	173146925	+	intron (NM_133646, intron 2 of 11)	70982	51776	MAP3K20	5.78074	0.00068201	TRUE	4.20242	0.15484	FALSE	7.07583	4.76588e-09	TRUE	-1.57832	0.14485	FALSE	1.29509	0.128246	FALSE	2.87341	3.22884e-06	TRUE
chr2_7773353_7773766	chr2	7773353	7773766	+	Intergenic	126096	101929551	LOC101929551	5.73055	1.38317e-13	TRUE	3.81799	0.00281354	TRUE	5.73158	2.08351e-14	TRUE	-1.91256	1.46251e-05	TRUE	0.00103464	0.998962	FALSE	1.91359	5.07462e-06	TRUE
chr3_41437457_41437852	chr3	41437457	41437852	+	intron (NR_136342, intron 32 of 34)	238203	1499	CTNNB1	5.9837	0.000230713	TRUE	3.89994	0.218845	FALSE	6.85518	6.577e-08	TRUE	-2.08376	0.0335687	TRUE	0.871476	0.365708	FALSE	2.95523	1.36899e-05	TRUE
chr2_64911129_64911333	chr2	64911129	64911333	+	intron (NR_036586, intron 1 of 2)	21216	400958	LINC02245	5.89117	0.000454015	TRUE	4.6642	0.0796949	FALSE	6.85182	1.30559e-07	TRUE	-1.22697	0.264327	FALSE	0.960648	0.343055	FALSE	2.18762	0.000676389	TRUE
chr3_187665897_187666049	chr3	187665897	187666049	+	Intergenic	4440	6750	SST	5.5445	0.00199599	TRUE	4.85079	0.0537942	FALSE	6.75656	1.88257e-07	TRUE	-0.693712	0.63357	FALSE	1.21205	0.21697	FALSE	1.90576	0.00217212	TRUE
chr2_157743097_157743406	chr2	157743097	157743406	+	intron (NM_001347666, intron 10 of 11)	95027	90	ACVR1	5.65519	1.69653e-13	TRUE	1.37619	0.612691	FALSE	5.72865	5.93015e-15	TRUE	-4.279	1.31001e-13	TRUE	0.0734566	0.940145	FALSE	4.35246	3.6513e-15	TRUE
chr15_80019436_80019577	chr15	80019436	80019577	+	Intergenic	-40062	54469	ZFAND6	5.26185	0.00580375	TRUE	0	1	FALSE	6.75656	1.88257e-07	TRUE	-5.26185	0.00349893	TRUE	1.49471	0.128246	FALSE	6.75656	8.31707e-09	TRUE
chr2_207279681_207279857	chr2	207279681	207279857	+	Intergenic	-10345	100302130	MIR1302-4	6.3925	1.73157e-05	TRUE	5.73335	0.00410193	TRUE	6.75598	2.4433e-07	TRUE	-0.659151	0.507516	FALSE	0.363478	0.760963	FALSE	1.02263	0.0876681	FALSE
chr18_59038633_59039247	chr18	59038633	59039247	+	intron (NR_024021, intron 2 of 4)	3261	390858	OACYLP	5.68501	5.21267e-13	TRUE	3.11771	0.0458915	TRUE	6.51401	8.50377e-22	TRUE	-2.5673	9.30106e-08	TRUE	0.828998	0.147776	FALSE	3.3963	4.30305e-16	TRUE
chr1_67274639_67275089	chr1	67274639	67275089	+	Intergenic	-32500	3595	IL12RB2	5.84963	1.55269e-25	TRUE	-0.398082	0.908116	FALSE	6.32083	3.61936e-35	TRUE	-6.24771	2.8097e-32	TRUE	0.471206	0.305615	FALSE	6.71892	1.32674e-43	TRUE
chr14_24693114_24693355	chr14	24693114	24693355	+	Intergenic	-58965	3002	GZMB	5.56013	3.93554e-13	TRUE	3.30063	0.0234091	TRUE	5.93093	1.23725e-17	TRUE	-2.2595	4.07702e-07	TRUE	0.370794	0.576804	FALSE	2.6303	4.31759e-11	TRUE
chr7_55309010_55309493	chr7	55309010	55309493	+	Intergenic	-53616	102725541	ELDR	5.36114	2.65107e-11	TRUE	3.00672	0.0591973	FALSE	6.18774	5.79019e-20	TRUE	-2.35442	1.64562e-06	TRUE	0.826602	0.129815	FALSE	3.18102	7.32496e-15	TRUE
chr11_123382275_123382636	chr11	123382275	123382636	+	promoter-TSS (NR_039714)	-943	100616319	MIR4493	4.74574	1.72696e-07	TRUE	4.71472	1.38094e-06	TRUE	5.98367	1.48147e-17	TRUE	-0.031029	0.980366	FALSE	1.23792	0.0248742	TRUE	1.26895	0.000400114	TRUE
chr1_15231696_15232029	chr1	15231696	15232029	+	Intergenic	-15363	114827	FHAD1	5.3669	1.25485e-11	TRUE	2.63914	0.137475	FALSE	5.97715	3.00593e-18	TRUE	-2.72777	5.22101e-08	TRUE	0.610249	0.296184	FALSE	3.33802	1.06931e-14	TRUE
chr3_191311081_191311473	chr3	191311081	191311473	+	intron (NM_198152, intron 3 of 8)	-17808	152137	CCDC50	5.46675	1.14365e-12	TRUE	1.67804	0.487641	FALSE	5.21788	1.95009e-11	TRUE	-3.78871	5.751e-12	TRUE	-0.248863	0.761487	FALSE	3.53984	1.7633e-10	TRUE
chr12_41897699_41897864	chr12	41897699	41897864	+	Intergenic	133592	101927038	LINC02400	5.41008	0.00340307	TRUE	4.20242	0.15484	FALSE	6.85525	6.577e-08	TRUE	-1.20766	0.373377	FALSE	1.44517	0.124175	FALSE	2.65283	4.77143e-05	TRUE
chr13_39306620_39307127	chr13	39306620	39307127	+	Intergenic	268562	387921	NHLRC3	5.31561	1.98037e-09	TRUE	2.48817	0.193844	FALSE	5.55768	2.00277e-11	TRUE	-2.82744	2.54685e-06	TRUE	0.242073	0.825176	FALSE	3.06952	3.31266e-08	TRUE
chr14_53701084_53701798	chr14	53701084	53701798	+	Intergenic	247043	100847076	MIR5580	5.31137	2.77987e-12	TRUE	0.117124	0.973638	FALSE	5.56291	1.32683e-14	TRUE	-5.19424	8.05361e-14	TRUE	0.251545	0.819774	FALSE	5.44579	2.5214e-16	TRUE
chr4_151030058_151030328	chr4	151030058	151030328	+	Intergenic	-14696	987	LRBA	6.06194	4.56905e-18	TRUE	3.75435	0.00324133	TRUE	5.81666	2.12338e-16	TRUE	-2.30759	1.77722e-09	TRUE	-0.245279	0.732056	FALSE	2.06231	8.24031e-08	TRUE
chr3_27927966_27928224	chr3	27927966	27928224	+	Intergenic	-93959	100996624	LINC01981	5.26184	0.00580375	TRUE	0	1	FALSE	6.94755	2.31206e-08	TRUE	-5.26184	0.00349893	TRUE	1.68572	0.0637606	FALSE	6.94755	5.94095e-10	TRUE
chr11_123381718_123382175	chr11	123381718	123382175	+	promoter-TSS (NR_039714)	-434	100616319	MIR4493	5.23328	2.1768e-10	TRUE	4.37216	4.60588e-05	TRUE	5.75199	2.61732e-15	TRUE	-0.86112	0.105796	FALSE	0.518712	0.448144	FALSE	1.37983	0.000308698	TRUE
chr5_145946529_145946887	chr5	145946529	145946887	+	intron (NM_152550, intron 2 of 9)	10145	153769	SH3RF2	4.8902	5.62127e-08	TRUE	-0.36129	0.936328	FALSE	5.7518	1.70504e-14	TRUE	-5.25149	1.07367e-09	TRUE	0.861598	0.200867	FALSE	6.11309	1.14199e-17	TRUE
chr4_122764778_122765100	chr4	122764778	122765100	+	Intergenic	32237	166379	BBS12	5.23833	4.32324e-11	TRUE	-0.35863	0.936443	FALSE	5.59096	5.00031e-15	TRUE	-5.59696	1.07217e-13	TRUE	0.352629	0.610068	FALSE	5.94959	1.46797e-18	TRUE
chr2_191112493_191112733	chr2	191112493	191112733	+	intron (NM_003151, intron 3 of 23)	38647	6775	STAT4	5.23377	1.20603e-10	TRUE	2.32927	0.235453	FALSE	5.60501	1.96075e-14	TRUE	-2.9045	5.91198e-08	TRUE	0.37124	0.614356	FALSE	3.27574	8.64255e-12	TRUE
chr1_170214118_170214804	chr1	170214118	170214804	+	intron (NR_146891, intron 1 of 4)	40082	105371609	LINC01681	5.23146	3.16852e-17	TRUE	1.45716	0.433282	FALSE	5.09683	1.08228e-16	TRUE	-3.77431	1.7813e-16	TRUE	-0.134636	0.864192	FALSE	3.63967	1.38724e-15	TRUE
chr12_128813968_128814205	chr12	128813968	128814205	+	intron (NM_145648, intron 2 of 7)	9910	121260	SLC15A4	5.22368	9.49166e-10	TRUE	1.67683	0.493364	FALSE	5.77531	2.66035e-14	TRUE	-3.54685	1.24924e-08	TRUE	0.551631	0.460242	FALSE	4.09848	1.42299e-13	TRUE
chr5_91059514_91059753	chr5	91059514	91059753	+	intron (NM_032119, intron 85 of 89)	254769	100505994	LUCAT1	5.02923	6.32926e-09	TRUE	3.55003	0.00944804	TRUE	5.67199	3.40121e-14	TRUE	-1.47921	0.00598047	TRUE	0.642755	0.35943	FALSE	2.12196	6.54161e-07	TRUE
chr12_121033932_121034191	chr12	121033932	121034191	+	intron (NM_001261825, intron 1 of 3)	5181	8638	OASL	5.18492	3.14942e-10	TRUE	3.0103	0.0577058	FALSE	5.82219	2.36292e-16	TRUE	-2.17462	1.70702e-05	TRUE	0.637268	0.306359	FALSE	2.81189	3.77656e-11	TRUE
chr5_111256156_111256497	chr5	111256156	111256497	+	intron (NM_001744, intron 1 of 10)	31784	814	CAMK4	5.14781	4.33736e-09	TRUE	0.468066	0.906327	FALSE	5.66546	5.1678e-13	TRUE	-4.67975	5.30604e-10	TRUE	0.517649	0.522423	FALSE	5.1974	1.33435e-14	TRUE
chr3_33030833_33031146	chr3	33030833	33031146	+	intron (NM_001079811, intron 10 of 15)	65812	643853	TMPPE	5.1328	1.93657e-09	TRUE	3.21509	0.0334854	TRUE	5.54786	5.74437e-13	TRUE	-1.91771	0.000290496	TRUE	0.415059	0.60889	FALSE	2.33277	3.55574e-07	TRUE
chr4_56648315_56648539	chr4	56648315	56648539	+	3' UTR (NM_032495, exon 4 of 4)	8095	84525	HOPX	5.10076	9.1757e-09	TRUE	1.92812	0.392089	FALSE	5.0275	7.0407e-09	TRUE	-3.17264	5.44767e-07	TRUE	-0.0732692	0.955283	FALSE	3.09937	5.04879e-07	TRUE
chr10_22363415_22363632	chr10	22363415	22363632	+	intron (NM_001253854, intron 5 of 13)	18078	9576	SPAG6	5.06385	1.07325e-09	TRUE	2.64063	0.13541	FALSE	5.46749	1.40373e-13	TRUE	-2.42323	4.15471e-06	TRUE	0.403636	0.577294	FALSE	2.82686	7.80803e-10	TRUE
chr5_61202233_61202721	chr5	61202233	61202721	+	intron (NR_109908, intron 3 of 3)	-40002	643155	SMIM15	4.77049	6.25202e-12	TRUE	0.808953	0.745512	FALSE	5.56264	2.30596e-20	TRUE	-3.96154	3.14909e-12	TRUE	0.792147	0.158348	FALSE	4.75369	6.76802e-22	TRUE
chr11_67079125_67079392	chr11	67079125	67079392	+	Intergenic	22440	29984	RHOD	4.89194	4.21966e-08	TRUE	2.14373	0.304786	FALSE	5.55879	4.23398e-13	TRUE	-2.7482	7.90144e-06	TRUE	0.666854	0.362012	FALSE	3.41506	6.29013e-11	TRUE
chr8_115421464_115421837	chr8	115421464	115421837	+	intron (NM_014112, intron 5 of 6)	246362	7227	TRPS1	5.03009	1.71767e-09	TRUE	1.92795	0.384497	FALSE	5.0715	2.05723e-10	TRUE	-3.10215	8.20643e-08	TRUE	0.0414121	0.971836	FALSE	3.14356	1.03944e-08	TRUE
chr5_36703797_36703977	chr5	36703797	36703977	+	Intergenic	97532	6507	SLC1A3	4.99879	1.58455e-09	TRUE	1.37705	0.610177	FALSE	4.8829	2.07575e-09	TRUE	-3.62174	4.2905e-09	TRUE	-0.115884	0.908738	FALSE	3.50586	7.10148e-09	TRUE
chr17_78474531_78475080	chr17	78474531	78475080	+	intron (NM_173628, intron 54 of 80)	-10105	100996295	DNAH17-AS1	4.99426	2.17614e-20	TRUE	1.70719	0.206419	FALSE	5.13136	1.34911e-23	TRUE	-3.28707	1.33871e-17	TRUE	0.137095	0.839587	FALSE	3.42416	1.07717e-20	TRUE
chr17_64061236_64061666	chr17	64061236	64061666	+	intron (NM_001433, intron 10 of 21)	-40817	3384	ICAM2	5.26302	6.31984e-18	TRUE	2.67449	0.0288532	TRUE	5.49202	6.53586e-22	TRUE	-2.58854	1.60149e-11	TRUE	0.228991	0.725231	FALSE	2.81753	3.19871e-15	TRUE
chr4_140131761_140132043	chr4	140131761	140132043	+	intron (NR_147610, intron 1 of 4)	3887	101927516	LOC101927516	4.7877	4.5932e-08	TRUE	1.92866	0.383807	FALSE	5.48988	5.61525e-14	TRUE	-2.85904	2.7707e-06	TRUE	0.702179	0.267085	FALSE	3.56122	1.29485e-12	TRUE
chr5_145056879_145057137	chr5	145056879	145057137	+	Intergenic	778361	153768	PRELID2	4.66261	4.63221e-07	TRUE	1.67901	0.490028	FALSE	5.48225	8.34057e-13	TRUE	-2.9836	1.0518e-05	TRUE	0.819645	0.238854	FALSE	3.80324	5.88392e-12	TRUE
chr2_111319657_111319882	chr2	111319657	111319882	+	intron (NR_136161, intron 3 of 5)	1317	100616341	MIR4435-2	4.7143	1.71124e-07	TRUE	2.77323	0.103538	FALSE	5.47845	2.30283e-13	TRUE	-1.94108	0.000909639	TRUE	0.764146	0.248018	FALSE	2.70522	3.89004e-09	TRUE
chr3_9224472_9224948	chr3	9224472	9224948	+	intron (NM_001033117, intron 1 of 21)	7815	100288831	SRGAP3-AS3	4.96886	5.6145e-09	TRUE	2.49278	0.177687	FALSE	4.93487	2.10586e-09	TRUE	-2.47608	7.97739e-06	TRUE	-0.0339906	0.978539	FALSE	2.44209	3.89531e-06	TRUE
chr6_157459341_157459569	chr6	157459341	157459569	+	intron (NM_153746, intron 1 of 8)	-69677	100500899	MIR3692	4.96498	2.7314e-09	TRUE	3.21111	0.0294908	TRUE	5.22874	6.26926e-12	TRUE	-1.75386	0.000456356	TRUE	0.263761	0.753293	FALSE	2.01763	3.53453e-06	TRUE
chr16_22482004_22482268	chr16	22482004	22482268	+	intron (NR_027154, intron 19 of 28)	-22313	100190986	LOC100190986	4.9152	3.9739e-14	TRUE	-1.22924	0.700198	FALSE	5.40477	9.73676e-21	TRUE	-6.14444	5.87094e-19	TRUE	0.489573	0.37533	FALSE	6.63401	2.5196e-27	TRUE
chr1_100377613_100377963	chr1	100377613	100377963	+	intron (NM_003672, intron 3 of 15)	25321	8556	CDC14A	4.87496	8.56206e-14	TRUE	1.76921	0.283911	FALSE	5.43408	2.94085e-21	TRUE	-3.10575	1.93832e-11	TRUE	0.559122	0.287507	FALSE	3.66487	1.9268e-19	TRUE
chr2_191422029_191422342	chr2	191422029	191422342	+	intron (NM_001330238, intron 29 of 29)	176909	4430	MYO1B	4.62221	5.14466e-07	TRUE	3.30108	0.0234248	TRUE	5.42814	8.38741e-13	TRUE	-1.32113	0.0311892	TRUE	0.805929	0.234853	FALSE	2.12706	1.15766e-06	TRUE
chr8_9006707_9006872	chr8	9006707	9006872	+	intron (NM_001354636, intron 1 of 7)	3663	90459	ERI1	4.91	0.0169439	TRUE	4.85079	0.0537942	FALSE	6.75656	1.88257e-07	TRUE	-0.0592026	0.981096	FALSE	1.84656	0.0642169	FALSE	1.90576	0.00217212	TRUE
chr14_31127719_31128016	chr14	31127719	31128016	+	exon (NM_015382, exon 26 of 43)	79656	25831	HECTD1	4.49576	1.09153e-06	TRUE	0.993407	0.753175	FALSE	5.41625	1.05317e-13	TRUE	-3.50235	1.70095e-06	TRUE	0.920486	0.129187	FALSE	4.42284	9.88356e-15	TRUE
chr3_114464599_114464895	chr3	114464599	114464895	+	intron (NR_121661, intron 1 of 2)	11154	101929754	ZBTB20-AS5	4.53708	1.23638e-06	TRUE	2.8961	0.0779785	FALSE	5.40887	1.07699e-12	TRUE	-1.64097	0.00869366	TRUE	0.871794	0.197206	FALSE	2.51277	4.66145e-08	TRUE
chr18_45938515_45938856	chr18	45938515	45938856	+	intron (NM_020964, intron 10 of 43)	28654	57724	EPG5	4.90606	6.56788e-08	TRUE	1.67565	0.49412	FALSE	5.70548	1.31161e-13	TRUE	-3.23041	1.25501e-06	TRUE	0.799423	0.266413	FALSE	4.02983	8.54908e-13	TRUE
chr1_84969833_84970159	chr1	84969833	84970159	+	intron (NM_153259, intron 1 of 13)	27126	255231	MCOLN2	4.3651	3.17758e-05	TRUE	4.47279	8.83185e-05	TRUE	5.39946	4.55061e-10	TRUE	0.107693	0.940333	FALSE	1.03435	0.24152	FALSE	0.926662	0.0898112	FALSE
chr3_18649710_18650202	chr3	18649710	18650202	+	Intergenic	-204368	6304	SATB1	5.06093	2.41283e-09	TRUE	3.30036	0.0238161	TRUE	5.375	3.15112e-12	TRUE	-1.76058	0.000655008	TRUE	0.314065	0.713383	FALSE	2.07464	3.51496e-06	TRUE
chr6_230500_230685	chr6	230500	230685	+	Intergenic	-25108	285766	LOC285766	5.00573	2.38882e-08	TRUE	2.48932	0.187724	FALSE	5.37476	4.63155e-11	TRUE	-2.51641	2.87874e-05	TRUE	0.36903	0.697607	FALSE	2.88543	8.04756e-08	TRUE
chr20_2179983_2180277	chr20	2179983	2180277	+	Intergenic	-26798	388780	LOC388780	5.12274	3.02986e-10	TRUE	3.61915	0.00570243	TRUE	5.37438	5.7862e-13	TRUE	-1.50359	0.00147445	TRUE	0.251638	0.759345	FALSE	1.75523	1.69562e-05	TRUE
chr17_30354848_30355207	chr17	30354848	30355207	+	Intergenic	-20968	388364	TMIGD1	4.86129	1.46751e-08	TRUE	2.14161	0.299455	FALSE	5.36859	5.04823e-13	TRUE	-2.71967	2.65961e-06	TRUE	0.5073	0.46145	FALSE	3.22698	6.29013e-11	TRUE
chr3_4507167_4507333	chr3	4507167	4507333	+	intron (NM_001099952, intron 2 of 58)	13902	3708	ITPR1	4.89667	1.16992e-08	TRUE	3.54695	0.00821505	TRUE	5.68855	8.91788e-16	TRUE	-1.34972	0.0104639	TRUE	0.791874	0.179563	FALSE	2.1416	3.39666e-08	TRUE
chr2_173133211_173133514	chr2	173133211	173133514	+	intron (NM_133646, intron 2 of 11)	57525	51776	MAP3K20	3.65074	0.00154472	TRUE	2.14215	0.305734	FALSE	5.35021	2.11346e-11	TRUE	-1.50859	0.117246	FALSE	1.69947	0.0179348	TRUE	3.20806	3.74581e-09	TRUE
chr9_122948370_122948662	chr9	122948370	122948662	+	intron (NM_012197, intron 1 of 25)	7507	23637	RABGAP1	4.89662	5.16312e-09	TRUE	0.993543	0.753155	FALSE	4.74393	1.10093e-08	TRUE	-3.90308	3.05803e-09	TRUE	-0.152695	0.881131	FALSE	3.75038	8.6765e-09	TRUE
chr1_173213022_173213416	chr1	173213022	173213416	+	Intergenic	-5906	7292	TNFSF4	5.2382	3.484e-11	TRUE	1.92957	0.382854	FALSE	5.3278	1.09003e-12	TRUE	-3.30863	1.31327e-09	TRUE	0.0895985	0.92367	FALSE	3.39823	3.4244e-11	TRUE
chr2_68663383_68663973	chr2	68663383	68663973	+	Intergenic	20090	10887	PROKR1	4.63036	3.227e-11	TRUE	2.02631	0.182043	FALSE	5.32529	1.08548e-18	TRUE	-2.60406	7.91984e-08	TRUE	0.694924	0.220054	FALSE	3.29898	2.48942e-15	TRUE
chr6_87738823_87739092	chr6	87738823	87739092	+	Intergenic	-36690	55122	AKIRIN2	4.89386	1.09302e-08	TRUE	0.469787	0.905488	FALSE	4.93857	1.34056e-09	TRUE	-4.42407	1.22684e-09	TRUE	0.0447144	0.970384	FALSE	4.46878	1.01245e-10	TRUE
chr20_35893981_35894286	chr20	35893981	35894286	+	intron (NM_016436, intron 9 of 17)	60493	51282	SCAND1	4.87404	1.38317e-13	TRUE	2.02714	0.179854	FALSE	5.20543	6.15101e-18	TRUE	-2.8469	3.62064e-10	TRUE	0.331392	0.614895	FALSE	3.17829	1.42169e-14	TRUE
chr11_76376780_76376988	chr11	76376780	76376988	+	intron (NM_004705, intron 1 of 4)	4081	5612	THAP12	4.34419	9.21876e-06	TRUE	3.21028	0.0325415	TRUE	5.31923	1.0424e-11	TRUE	-1.13391	0.114271	FALSE	0.975042	0.169915	FALSE	2.10895	4.68022e-06	TRUE
chr11_96051842_96052204	chr11	96051842	96052204	+	intron (NM_032427, intron 2 of 4)	-127816	8898	MTMR2	4.86204	4.16905e-08	TRUE	2.64111	0.138641	FALSE	5.42102	2.0923e-12	TRUE	-2.22093	0.000121438	TRUE	0.558979	0.456243	FALSE	2.77991	1.18962e-08	TRUE
chr3_31252510_31252795	chr3	31252510	31252795	+	Intergenic	-90865	100423038	MIR466	4.67047	1.72582e-07	TRUE	3.11323	0.0403574	TRUE	5.29883	1.97974e-12	TRUE	-1.55725	0.00612775	TRUE	0.628354	0.361526	FALSE	2.1856	5.49473e-07	TRUE
chr18_44893048_44893470	chr18	44893048	44893470	+	intron (NM_015559, intron 3 of 5)	76907	100422829	MIR4319	4.82395	1.22758e-12	TRUE	3.50944	0.000262623	TRUE	5.4516	7.5925e-20	TRUE	-1.31451	0.00199024	TRUE	0.627647	0.269362	FALSE	1.94216	2.13603e-08	TRUE
chr10_89805491_89806052	chr10	89805491	89806052	+	Intergenic	-23722	643529	LINC00865	4.8213	4.70413e-12	TRUE	2.03094	0.186205	FALSE	5.32063	3.24785e-17	TRUE	-2.79036	1.27306e-08	TRUE	0.499337	0.455518	FALSE	3.2897	9.09233e-14	TRUE
chr4_76058318_76058672	chr4	76058318	76058672	+	intron (NM_001130017, intron 1 of 9)	-16200	419	ART3	4.8002	6.27956e-18	TRUE	1.70398	0.20723	FALSE	5.46281	2.22013e-29	TRUE	-3.09622	6.90469e-15	TRUE	0.662617	0.119442	FALSE	3.75883	3.42547e-27	TRUE
chr8_125330742_125331041	chr8	125330742	125331041	+	intron (NM_001349485, intron 4 of 6)	-99430	10221	TRIB1	4.78875	1.17217e-12	TRUE	1.2698	0.525917	FALSE	4.81981	1.04222e-13	TRUE	-3.51895	7.53063e-12	TRUE	0.0310576	0.977642	FALSE	3.55001	6.39947e-13	TRUE
chr3_23758493_23758756	chr3	23758493	23758756	+	Intergenic	-47269	7324	UBE2E1	4.78778	3.4482e-08	TRUE	2.14219	0.298775	FALSE	5.60836	1.50944e-15	TRUE	-2.64558	6.35114e-06	TRUE	0.820583	0.154561	FALSE	3.46617	9.37767e-14	TRUE
chr6_144305918_144306432	chr6	144305918	144306432	+	intron (NM_007124, intron 1 of 73)	14438	7402	UTRN	5.8009	2.66853e-15	TRUE	1.93138	0.384977	FALSE	5.23589	2.86422e-11	TRUE	-3.86952	3.04837e-14	TRUE	-0.565009	0.374443	FALSE	3.30451	1.31034e-09	TRUE
chr15_88510043_88510495	chr15	88510043	88510495	+	intron (NR_135742, intron 6 of 6)	36106	55070	DET1	4.78469	5.81791e-08	TRUE	1.37761	0.61076	FALSE	4.5464	2.74892e-07	TRUE	-3.40708	2.65732e-07	TRUE	-0.238288	0.822634	FALSE	3.16879	1.8701e-06	TRUE
chr18_23306901_23307262	chr18	23306901	23307262	+	intron (NR_148385, intron 13 of 13)	130888	85019	TMEM241	4.7754	1.66733e-12	TRUE	2.67581	0.0299698	TRUE	4.694	1.51526e-12	TRUE	-2.09959	1.37974e-06	TRUE	-0.0814067	0.932009	FALSE	2.01818	1.76331e-06	TRUE
chr2_55302309_55302561	chr2	55302309	55302561	+	intron (NM_018084, intron 25 of 31)	20116	344405	PRORSD1P	4.50308	2.12532e-06	TRUE	0.468588	0.905705	FALSE	5.20748	6.42828e-11	TRUE	-4.03449	7.2496e-07	TRUE	0.704403	0.362706	FALSE	4.73889	2.88332e-12	TRUE
chr14_56202298_56202564	chr14	56202298	56202564	+	intron (NM_021255, intron 2 of 5)	84056	57161	PELI2	4.75896	1.42275e-07	TRUE	2.32916	0.236593	FALSE	5.35744	5.79971e-12	TRUE	-2.4298	6.96072e-05	TRUE	0.598477	0.429571	FALSE	3.02827	3.36223e-09	TRUE
chr10_110249603_110249787	chr10	110249603	110249787	+	intron (NM_005962, intron 3 of 5)	23691	4601	MXI1	4.75431	9.99819e-08	TRUE	0.994826	0.753575	FALSE	5.28567	8.49873e-12	TRUE	-3.75948	1.04247e-07	TRUE	0.531364	0.479531	FALSE	4.29084	2.1143e-12	TRUE
chr4_26751874_26752190	chr4	26751874	26752190	+	intron (NM_018317, intron 19 of 20)	108212	105374546	LOC105374546	4.40048	2.62095e-06	TRUE	2.49192	0.1739	FALSE	5.17443	8.97658e-12	TRUE	-1.90856	0.00254686	TRUE	0.773951	0.244974	FALSE	2.68251	1.62248e-08	TRUE
chr17_42333111_42333526	chr17	42333111	42333526	+	intron (NM_139276, intron 10 of 23)	45262	6776	STAT5A	4.74698	8.771e-08	TRUE	1.67887	0.487437	FALSE	5.06899	2.24919e-10	TRUE	-3.06811	1.66784e-06	TRUE	0.322017	0.720506	FALSE	3.39012	2.84723e-09	TRUE
chr18_58807366_58807676	chr18	58807366	58807676	+	Intergenic	-6359	105372147	LINC01926	4.71011	7.17698e-08	TRUE	1.37673	0.60972	FALSE	4.84746	2.46371e-09	TRUE	-3.33339	3.24436e-07	TRUE	0.137344	0.894398	FALSE	3.47073	8.36816e-09	TRUE
chr3_106068770_106069113	chr3	106068770	106069113	+	Intergenic	-199519	868	CBLB	4.68901	6.06644e-12	TRUE	1.77063	0.284855	FALSE	5.27375	1.1456e-18	TRUE	-2.91838	2.09965e-09	TRUE	0.584741	0.306805	FALSE	3.50312	1.83834e-16	TRUE
chr2_54041274_54041570	chr2	54041274	54041570	+	intron (NM_001320587, intron 2 of 5)	70319	98	ACYP2	4.68503	6.469e-07	TRUE	0.992211	0.755363	FALSE	5.23931	1.94931e-10	TRUE	-3.69282	1.03353e-06	TRUE	0.554281	0.521492	FALSE	4.2471	1.01591e-10	TRUE
chr16_48596276_48596636	chr16	48596276	48596636	+	intron (NM_153029, intron 1 of 6)	13753	9683	N4BP1	4.28788	1.67664e-08	TRUE	1.46164	0.436397	FALSE	5.13065	1.81026e-15	TRUE	-2.82624	9.40684e-07	TRUE	0.842768	0.185278	FALSE	3.66901	4.05035e-14	TRUE
chr7_100546503_100546836	chr7	100546503	100546836	+	intron (NM_006076, intron 1 of 11)	7458	3268	AGFG2	4.67983	1.18019e-15	TRUE	1.602	0.258154	FALSE	4.55508	2.76151e-15	TRUE	-3.07783	5.61746e-13	TRUE	-0.124752	0.882089	FALSE	2.95308	2.52523e-12	TRUE
chr3_101890780_101891059	chr3	101890780	101891059	+	Intergenic	41405	64332	NFKBIZ	3.94025	0.000209798	TRUE	2.77186	0.103896	FALSE	5.1073	2.06336e-10	TRUE	-1.16839	0.167131	FALSE	1.16705	0.111058	FALSE	2.33544	2.61933e-06	TRUE
chr3_188327053_188327313	chr3	188327053	188327313	+	intron (NM_005578, intron 2 of 10)	101778	4026	LPP	4.6717	1.74923e-07	TRUE	1.92942	0.383043	FALSE	4.7482	1.75363e-08	TRUE	-2.74228	1.16018e-05	TRUE	0.0764945	0.949684	FALSE	2.81878	1.24462e-06	TRUE
chr13_43094979_43095264	chr13	43094979	43095264	+	intron (NM_013238, intron 5 of 5)	-18044	100874159	LINC00400	4.84067	2.51006e-07	TRUE	-2.52116	0.501895	FALSE	5.0966	4.51285e-09	TRUE	-7.36183	3.09539e-10	TRUE	0.255932	0.825453	FALSE	7.61776	1.84117e-12	TRUE
chr8_29526014_29526286	chr8	29526014	29526286	+	Intergenic	-175400	1846	DUSP4	4.67168	3.65987e-07	TRUE	1.92743	0.387351	FALSE	5.89561	9.33672e-17	TRUE	-2.74425	2.50883e-05	TRUE	1.22393	0.0310885	TRUE	3.96818	1.15843e-15	TRUE
chr2_177207199_177207388	chr2	177207199	177207388	+	Intergenic	-5401	220988	HNRNPA3	4.78764	2.63659e-08	TRUE	2.77326	0.0992124	FALSE	5.0922	4.45709e-11	TRUE	-2.01438	0.00018961	TRUE	0.304563	0.713809	FALSE	2.31895	6.63352e-07	TRUE
chr6_53441265_53441523	chr6	53441265	53441523	+	Intergenic	-92215	60481	ELOVL5	4.66762	1.96327e-07	TRUE	2.14175	0.299872	FALSE	5.50894	3.429e-14	TRUE	-2.52587	3.75181e-05	TRUE	0.841318	0.17287	FALSE	3.36719	3.44458e-12	TRUE
chr9_121353660_121354008	chr9	121353660	121354008	+	intron (NR_073037, intron 4 of 7)	16470	2040	STOM	4.65975	5.8175e-07	TRUE	1.92682	0.389452	FALSE	5.83181	1.77481e-15	TRUE	-2.73293	4.04663e-05	TRUE	1.17206	0.0590317	FALSE	3.90498	3.13739e-14	TRUE
chr16_83689341_83689627	chr16	83689341	83689627	+	intron (NM_001220488, intron 11 of 14)	114492	102724163	LOC102724163	4.67024	3.033e-07	TRUE	2.63913	0.137571	FALSE	5.07455	3.44991e-10	TRUE	-2.03112	0.000739646	TRUE	0.404305	0.645167	FALSE	2.43542	1.70054e-06	TRUE
chr6_20708394_20708757	chr6	20708394	20708757	+	intron (NM_017774, intron 5 of 15)	174118	54901	CDKAL1	4.64391	4.52274e-15	TRUE	-0.0274326	0.992667	FALSE	4.7215	1.00788e-16	TRUE	-4.67134	4.66156e-18	TRUE	0.0775841	0.929395	FALSE	4.74893	7.20539e-20	TRUE
chr2_25438350_25438693	chr2	25438350	25438693	+	intron (NM_183360, intron 12 of 19)	-95931	1788	DNMT3A	4.63296	9.74291e-07	TRUE	0.996461	0.75415	FALSE	5.2694	1.06983e-10	TRUE	-3.6365	1.68914e-06	TRUE	0.636432	0.445409	FALSE	4.27294	5.4839e-11	TRUE
chr15_68526367_68526557	chr15	68526367	68526557	+	intron (NM_001324014, intron 1 of 12)	8089	10391	CORO2B	3.86846	0.000288914	TRUE	3.21093	0.0297958	TRUE	5.06759	1.35641e-10	TRUE	-0.657533	0.508599	FALSE	1.19913	0.08688	FALSE	1.85666	4.90161e-05	TRUE
chr14_54622639_54622890	chr14	54622639	54622890	+	intron (NM_015589, intron 1 of 11)	55152	23034	SAMD4A	4.62953	3.25782e-07	TRUE	2.8956	0.0760851	FALSE	4.95029	1.20688e-09	TRUE	-1.73393	0.00313527	TRUE	0.320761	0.732271	FALSE	2.05469	3.24438e-05	TRUE
chr3_59935098_59935387	chr3	59935098	59935387	+	intron (NM_001166243, intron 7 of 9)	145885	2272	FHIT	4.24431	1.21252e-05	TRUE	2.32756	0.230594	FALSE	5.0639	6.85862e-11	TRUE	-1.91675	0.00467867	TRUE	0.819588	0.239525	FALSE	2.73634	4.09152e-08	TRUE
chr7_141558602_141558931	chr7	141558602	141558931	+	intron (NM_018238, intron 2 of 15)	7488	55750	AGK	5.0244	3.13547e-15	TRUE	0.508316	0.859989	FALSE	5.06255	1.46747e-16	TRUE	-4.51608	2.9984e-17	TRUE	0.0381533	0.967651	FALSE	4.55424	1.50893e-18	TRUE
chr11_88179251_88179566	chr11	88179251	88179566	+	Intergenic	2906	100423040	MIR3166	4.58866	3.48144e-06	TRUE	3.38908	0.022355	TRUE	5.04908	1.22373e-08	TRUE	-1.19958	0.102858	FALSE	0.46042	0.667922	FALSE	1.66	0.00299414	TRUE
chr6_155224125_155224438	chr6	155224125	155224438	+	intron (NM_001010927, intron 1 of 12)	7318	26230	TIAM2	4.62886	2.88663e-07	TRUE	1.37723	0.610331	FALSE	5.08753	9.83268e-11	TRUE	-3.25163	1.63437e-06	TRUE	0.45867	0.562225	FALSE	3.7103	2.15546e-10	TRUE
chr1_53901113_53901428	chr1	53901113	53901428	+	intron (NM_001324316, intron 1 of 1)	7083	1733	DIO1	4.62823	1.99285e-07	TRUE	2.32758	0.230594	FALSE	4.84764	2.41379e-09	TRUE	-2.30065	0.000100883	TRUE	0.219414	0.822634	FALSE	2.52006	1.58838e-06	TRUE
chr7_96284904_96285157	chr7	96284904	96285157	+	intron (NM_014251, intron 2 of 17)	37117	10165	SLC25A13	4.34835	5.83764e-06	TRUE	1.92847	0.383611	FALSE	5.03987	2.55341e-10	TRUE	-2.41988	0.000430966	TRUE	0.691524	0.364269	FALSE	3.1114	1.31379e-08	TRUE
chr1_186738915_186739315	chr1	186738915	186739315	+	Intergenic	58461	103752588	PACERR	4.01865	3.40214e-07	TRUE	3.59139	0.000144396	TRUE	5.03942	4.0356e-15	TRUE	-0.42726	0.596423	FALSE	1.02077	0.0895201	FALSE	1.44803	0.00014096	TRUE
chr9_21761327_21761624	chr9	21761327	21761624	+	Intergenic	-41161	4507	MTAP	4.67015	1.45991e-07	TRUE	2.3276	0.231791	FALSE	5.03524	1.65561e-10	TRUE	-2.34255	7.23656e-05	TRUE	0.365086	0.661762	FALSE	2.70764	1.00411e-07	TRUE
chr17_9389077_9389481	chr17	9389077	9389481	+	intron (NR_033656, intron 4 of 5)	186679	9482	STX8	4.62614	3.59465e-07	TRUE	3.21163	0.030624	TRUE	4.80715	9.95884e-09	TRUE	-1.41451	0.0167438	TRUE	0.181006	0.86636	FALSE	1.59552	0.00146777	TRUE
chr3_46829595_46830051	chr3	46829595	46830051	+	non-coding (NR_148409, exon 3 of 3)	4000	339906	PRSS42	4.59777	1.16301e-11	TRUE	1.90401	0.226001	FALSE	4.67614	4.14291e-13	TRUE	-2.69375	1.13669e-08	TRUE	0.0783752	0.93175	FALSE	2.77213	4.81703e-10	TRUE
chr15_94234438_94234578	chr15	94234438	94234578	+	Intergenic	-63693	55784	MCTP2	4.58804	7.1181e-07	TRUE	3.61893	0.00628489	TRUE	4.99123	1.12048e-09	TRUE	-0.969106	0.139646	FALSE	0.403198	0.654394	FALSE	1.3723	0.00373444	TRUE
chr8_76985210_76985546	chr8	76985210	76985546	+	intron (NM_001172087, intron 2 of 2)	14910	5828	PEX2	4.08512	2.09332e-10	TRUE	2.53159	0.0143147	TRUE	5.00855	1.55198e-20	TRUE	-1.55353	0.000444455	TRUE	0.923427	0.0642889	FALSE	2.47696	1.49885e-12	TRUE
chr13_40518482_40518865	chr13	40518482	40518865	+	Intergenic	-37667	646982	LINC00598	4.58304	8.65231e-19	TRUE	0.840869	0.613059	FALSE	4.61727	1.83129e-20	TRUE	-3.74217	2.60117e-19	TRUE	0.0342382	0.96756	FALSE	3.7764	8.13186e-21	TRUE
chr5_80837653_80838053	chr5	80837653	80838053	+	intron (NM_002439, intron 20 of 23)	-122836	5924	RASGRF2	4.5633	1.2911e-09	TRUE	0.50451	0.862682	FALSE	5.13595	3.05839e-14	TRUE	-4.05879	3.62064e-10	TRUE	0.572649	0.45088	FALSE	4.63144	1.94753e-15	TRUE
chr16_58854253_58854703	chr16	58854253	58854703	+	Intergenic	-120121	2806	GOT2	4.56051	1.24545e-08	TRUE	0.116103	0.973655	FALSE	4.29442	6.93996e-08	TRUE	-4.4444	1.13957e-09	TRUE	-0.266084	0.822489	FALSE	4.17832	8.72365e-09	TRUE
chr7_88628568_88629006	chr7	88628568	88629006	+	Intergenic	-130581	219578	ZNF804B	4.06595	7.58485e-05	TRUE	3.00872	0.0562927	FALSE	4.98068	9.43703e-10	TRUE	-1.05723	0.187289	FALSE	0.914729	0.232773	FALSE	1.97196	5.5688e-05	TRUE
chr17_50511147_50511388	chr17	50511147	50511388	+	intron (NM_032133, intron 1 of 18)	2883	84073	MYCBPAP	4.40026	2.81852e-06	TRUE	2.14212	0.298082	FALSE	4.97627	3.89238e-10	TRUE	-2.25814	0.000538113	TRUE	0.576011	0.453867	FALSE	2.83415	7.32784e-08	TRUE
chr17_44417612_44417875	chr17	44417612	44417875	+	intron (NM_001002909, intron 6 of 7)	19108	23131	GPATCH8	4.7501	5.38072e-08	TRUE	1.92892	0.382421	FALSE	4.97528	4.57727e-10	TRUE	-2.82118	3.21612e-06	TRUE	0.225181	0.813224	FALSE	3.04636	2.41315e-08	TRUE
chr17_50311179_50311458	chr17	50311179	50311458	+	Intergenic	-23463	103752589	TMEM92-AS1	4.54143	6.17948e-07	TRUE	1.92936	0.38203	FALSE	5.35018	3.67676e-13	TRUE	-2.61207	4.37295e-05	TRUE	0.808746	0.198453	FALSE	3.42081	9.85751e-12	TRUE
chr6_163793566_163794001	chr6	163793566	163794001	+	Intergenic	-122299	102724152	LOC102724152	2.57273	0.0802259	FALSE	4.32965	7.51163e-05	TRUE	4.97086	4.02562e-09	TRUE	1.75693	0.0149734	TRUE	2.39813	0.00533848	TRUE	0.641205	0.211663	FALSE
chr14_66998088_66998418	chr14	66998088	66998418	+	intron (NM_001024218, intron 8 of 21)	-191140	161142	FAM71D	4.45716	3.84625e-06	TRUE	1.3778	0.612586	FALSE	4.96753	3.48156e-09	TRUE	-3.07936	3.13685e-05	TRUE	0.51037	0.575724	FALSE	3.58973	1.43686e-08	TRUE
chr2_201532714_201533008	chr2	201532714	201533008	+	intron (NM_001168216, intron 11 of 12)	81192	55437	STRADB	3.8709	0.000316321	TRUE	1.67911	0.487471	FALSE	4.95396	1.47335e-09	TRUE	-2.19179	0.0087764	TRUE	1.08306	0.161862	FALSE	3.27485	2.26278e-08	TRUE
chr2_65405113_65405370	chr2	65405113	65405370	+	intron (NM_181784, intron 1 of 5)	27281	200734	SPRED2	4.54058	7.10188e-07	TRUE	2.32701	0.232715	FALSE	5.09495	7.28779e-11	TRUE	-2.21357	0.000342546	TRUE	0.55437	0.460206	FALSE	2.76794	4.34859e-08	TRUE
chr10_36564438_36564913	chr10	36564438	36564913	+	Intergenic	-561182	91074	ANKRD30A	4.52771	6.18206e-11	TRUE	-1.22645	0.700746	FALSE	4.95296	1.20046e-15	TRUE	-5.75416	8.35415e-15	TRUE	0.425248	0.505852	FALSE	6.17941	1.02455e-20	TRUE
chr6_20467537_20467741	chr6	20467537	20467741	+	intron (NM_001243076, intron 1 of 6)	63960	1871	E2F3	4.29803	8.21549e-06	TRUE	1.37652	0.610215	FALSE	4.94696	7.54104e-10	TRUE	-2.92151	6.85336e-05	TRUE	0.648934	0.404589	FALSE	3.57044	2.15448e-09	TRUE
chr1_51974184_51974476	chr1	51974184	51974476	+	intron (NM_002867, intron 2 of 4)	16434	5865	RAB3B	4.00569	9.3927e-05	TRUE	3.21094	0.0285159	TRUE	4.94431	5.35333e-10	TRUE	-0.794755	0.353523	FALSE	0.938618	0.197662	FALSE	1.73337	0.000160007	TRUE
chr3_28218499_28219030	chr3	28218499	28219030	+	Intergenic	-22869	152100	CMC1	4.51313	9.65818e-13	TRUE	-1.76797	0.498492	FALSE	5.0432	1.76215e-18	TRUE	-6.2811	4.19157e-18	TRUE	0.530067	0.412439	FALSE	6.81116	3.09466e-25	TRUE
chr7_55508668_55508996	chr7	55508668	55508996	+	intron (NM_030796, intron 2 of 4)	18048	81552	VOPP1	4.8613	9.56318e-09	TRUE	2.63937	0.132706	FALSE	4.94422	5.97972e-10	TRUE	-2.22193	3.34165e-05	TRUE	0.0829199	0.9368	FALSE	2.30485	3.04601e-06	TRUE
chr3_71543701_71543909	chr3	71543701	71543909	+	promoter-TSS (NM_001244816)	-248	27086	FOXP1	4.29733	8.55243e-06	TRUE	2.14235	0.298799	FALSE	4.94249	8.7553e-10	TRUE	-2.15498	0.00157831	TRUE	0.645168	0.410539	FALSE	2.80015	1.71594e-07	TRUE
chr8_8301627_8302130	chr8	8301627	8302130	+	Intergenic	73308	286042	FAM86B3P	4.49569	1.38317e-13	TRUE	0.521398	0.823337	FALSE	4.70364	1.59788e-16	TRUE	-3.97429	1.25769e-14	TRUE	0.207946	0.790611	FALSE	4.18224	5.84888e-18	TRUE
chr2_144570635_144570865	chr2	144570635	144570865	+	intron (NR_110570, intron 2 of 2)	-46306	105373656	LOC105373656	4.62919	2.86272e-07	TRUE	0.469711	0.905488	FALSE	4.93996	1.0697e-09	TRUE	-4.15948	5.78559e-08	TRUE	0.310771	0.737726	FALSE	4.47025	7.45881e-11	TRUE
chr9_110808712_110809004	chr9	110808712	110809004	+	Intergenic	140087	4593	MUSK	4.39773	2.53937e-09	TRUE	1.05934	0.631158	FALSE	4.93902	4.46749e-14	TRUE	-3.33838	1.12903e-08	TRUE	0.541292	0.442889	FALSE	3.87968	6.13191e-14	TRUE
chr12_20985521_20985720	chr12	20985521	20985720	+	Intergenic	-30076	338821	SLCO1B7	4.49293	1.57237e-06	TRUE	1.37681	0.610854	FALSE	4.6997	4.21684e-08	TRUE	-3.11613	1.11586e-05	TRUE	0.206765	0.854452	FALSE	3.32289	2.20613e-07	TRUE
chr8_42156106_42156273	chr8	42156106	42156273	+	intron (NM_001134296, intron 3 of 9)	3243	10947	AP3M2	4.45626	3.45249e-06	TRUE	2.49505	0.179753	FALSE	5.31205	1.29888e-11	TRUE	-1.96122	0.00310871	TRUE	0.855783	0.23745	FALSE	2.817	2.41643e-08	TRUE
chr6_159023874_159024251	chr6	159023874	159024251	+	Intergenic	18291	117289	TAGAP	4.44942	2.12891e-06	TRUE	1.92895	0.383341	FALSE	5.08643	1.06858e-10	TRUE	-2.52048	0.000155375	TRUE	0.637001	0.396833	FALSE	3.15748	5.24934e-09	TRUE
chr11_103997079_103997424	chr11	103997079	103997424	+	intron (NM_025208, intron 2 of 6)	-39329	414301	DDI1	4.57426	4.71116e-11	TRUE	1.77063	0.28442	FALSE	4.92639	6.05926e-15	TRUE	-2.80363	1.59151e-08	TRUE	0.35213	0.619222	FALSE	3.15576	1.77066e-12	TRUE
chr9_4983162_4983314	chr9	4983162	4983314	+	Intergenic	-1848	3717	JAK2	4.8957	7.24488e-09	TRUE	0.993781	0.753155	FALSE	4.91311	1.27583e-09	TRUE	-3.90192	4.56637e-09	TRUE	0.0174043	0.988134	FALSE	3.91933	6.97232e-10	TRUE
chr2_205774041_205774403	chr2	205774041	205774403	+	intron (NM_201266, intron 15 of 16)	91722	8828	NRP2	4.44899	1.56087e-06	TRUE	2.32757	0.230594	FALSE	4.46836	3.72113e-07	TRUE	-2.12142	0.000728415	TRUE	0.0193742	0.988408	FALSE	2.14079	0.000225142	TRUE
chr9_125660028_125660395	chr9	125660028	125660395	+	intron (NM_001006621, intron 1 of 9)	47023	79109	MAPKAP1	3.79666	0.000420954	TRUE	0.993548	0.753155	FALSE	4.91278	8.91636e-10	TRUE	-2.80311	0.00159383	TRUE	1.11612	0.125202	FALSE	3.91923	4.34136e-10	TRUE
chr15_55241933_55242236	chr15	55241933	55242236	+	intron (NM_183234, intron 1 of 6)	28202	5873	RAB27A	4.44813	1.84542e-06	TRUE	2.89585	0.0745147	FALSE	4.88039	2.06009e-09	TRUE	-1.55228	0.012395	TRUE	0.432266	0.615876	FALSE	1.98454	5.45594e-05	TRUE
chr3_46359775_46360049	chr3	46359775	46360049	+	3' UTR (NM_001123041, exon 3 of 3)	6168	729230	CCR2	4.0674	6.96099e-05	TRUE	1.67995	0.486587	FALSE	4.90874	2.00135e-09	TRUE	-2.38745	0.00201043	TRUE	0.841338	0.281216	FALSE	3.22878	3.12397e-08	TRUE
chr22_49824272_49824493	chr22	49824272	49824493	+	promoter-TSS (NM_001349940)	-51	23774	BRD1	4.2452	1.46553e-05	TRUE	0.993538	0.753327	FALSE	4.90853	1.66243e-09	TRUE	-3.25167	3.49962e-05	TRUE	0.663322	0.406673	FALSE	3.91499	9.57167e-10	TRUE
chr5_131595238_131595627	chr5	131595238	131595627	+	intron (NM_001164390, intron 3 of 17)	39804	51735	RAPGEF6	4.67562	5.01564e-07	TRUE	3.61501	0.00731178	TRUE	4.90314	1.07911e-08	TRUE	-1.06062	0.105415	FALSE	0.227523	0.839922	FALSE	1.28814	0.0126267	TRUE
chr15_85073596_85073903	chr15	85073596	85073903	+	intron (NM_001243137, intron 3 of 21)	91775	5151	PDE8A	4.41587	1.67787e-09	TRUE	0.510293	0.860035	FALSE	5.04142	3.28934e-15	TRUE	-3.90557	4.40298e-10	TRUE	0.625549	0.338569	FALSE	4.53112	9.48228e-17	TRUE
chr4_102586331_102586581	chr4	102586331	102586581	+	intron (NM_001165412, intron 11 of 23)	-83970	105377621	LOC105377621	4.40051	2.66828e-06	TRUE	1.92907	0.38182	FALSE	4.97482	3.41312e-10	TRUE	-2.47144	0.000195242	TRUE	0.574302	0.452276	FALSE	3.04575	1.72965e-08	TRUE
chr18_6004160_6004387	chr18	6004160	6004387	+	intron (NM_001330559, intron 16 of 18)	-108319	645369	TMEM200C	4.1306	3.62677e-05	TRUE	1.67919	0.486087	FALSE	4.88222	1.87752e-09	TRUE	-2.45141	0.00102523	TRUE	0.751622	0.334722	FALSE	3.20303	2.81595e-08	TRUE
chr5_97888457_97888752	chr5	97888457	97888752	+	intron (NR_146299, intron 2 of 2)	47846	109729164	LINC02234	4.18809	2.08949e-05	TRUE	3.38846	0.014879	TRUE	4.88079	1.65245e-09	TRUE	-0.799628	0.307569	FALSE	0.6927	0.37533	FALSE	1.49233	0.00130142	TRUE
chr10_32250610_32250835	chr10	32250610	32250835	+	Intergenic	96326	80314	EPC1	3.93935	0.00015347	TRUE	0.993543	0.753155	FALSE	4.8806	1.46881e-09	TRUE	-2.9458	0.00050691	TRUE	0.941249	0.209241	FALSE	3.88705	7.84709e-10	TRUE
chr3_23443052_23443270	chr3	23443052	23443270	+	intron (NM_152653, intron 3 of 5)	239868	7325	UBE2E2	3.93934	0.00015347	TRUE	3.3883	0.0147464	TRUE	4.88054	1.46881e-09	TRUE	-0.55104	0.57901	FALSE	0.9412	0.209241	FALSE	1.49224	0.00121711	TRUE
chr17_64260951_64261167	chr17	64260951	64261167	+	intron (NM_001288732, intron 1 of 11)	2264	55852	TEX2	4.5414	5.55054e-07	TRUE	0.470267	0.905488	FALSE	4.88052	1.46881e-09	TRUE	-4.07113	1.27578e-07	TRUE	0.339129	0.701912	FALSE	4.41026	1.04369e-10	TRUE
chr15_60649832_60650133	chr15	60649832	60650133	+	intron (NM_134261, intron 2 of 10)	-22452	6095	RORA	4.39752	1.46317e-09	TRUE	0.809946	0.744115	FALSE	4.87532	5.23646e-14	TRUE	-3.58758	1.56421e-09	TRUE	0.477797	0.493577	FALSE	4.06537	1.33435e-14	TRUE
chr16_9914336_9914619	chr16	9914336	9914619	+	intron (NM_000833, intron 4 of 13)	267590	2903	GRIN2A	4.49512	1.14057e-06	TRUE	1.37692	0.610201	FALSE	4.87862	2.20869e-09	TRUE	-3.1182	7.76959e-06	TRUE	0.383503	0.665433	FALSE	3.5017	7.63667e-09	TRUE
chr15_94303781_94303960	chr15	94303781	94303960	+	intron (NM_001159643, intron 1 of 19)	5669	55784	MCTP2	4.12791	3.99215e-05	TRUE	3.00828	0.0550091	FALSE	4.87861	2.50499e-09	TRUE	-1.11963	0.137815	FALSE	0.750695	0.345179	FALSE	1.87033	0.000136695	TRUE
chr1_207500349_207500596	chr1	207500349	207500596	+	intron (NM_000573, intron 1 of 38)	4344	1378	CR1	3.99314	1.94398e-07	TRUE	1.77066	0.28274	FALSE	4.87858	5.79443e-15	TRUE	-2.22247	6.89288e-05	TRUE	0.885437	0.124996	FALSE	3.10791	1.62654e-12	TRUE
chr9_130814240_130814566	chr9	130814240	130814566	+	intron (NM_007313, intron 1 of 10)	-20852	25	ABL1	4.67082	1.59418e-07	TRUE	1.37725	0.610177	FALSE	4.87842	2.31925e-09	TRUE	-3.29357	8.23072e-07	TRUE	0.207608	0.835307	FALSE	3.50118	8.0934e-09	TRUE
chr8_104175506_104175965	chr8	104175506	104175965	+	intron (NM_001348509, intron 22 of 26)	-47600	9699	RIMS2	4.38092	7.09073e-09	TRUE	0.507653	0.861436	FALSE	4.64594	3.33459e-11	TRUE	-3.87326	2.22402e-09	TRUE	0.265018	0.783692	FALSE	4.13828	4.74521e-12	TRUE
chr1_113133105_113133449	chr1	113133105	113133449	+	Intergenic	60107	9860	LRIG2	4.22745	1.2603e-08	TRUE	1.27677	0.523232	FALSE	4.86324	2.81757e-14	TRUE	-2.95067	2.24758e-07	TRUE	0.63579	0.32411	FALSE	3.58646	1.62814e-13	TRUE
chr2_143704454_143704807	chr2	143704454	143704807	+	intron (NM_018460, intron 13 of 13)	-232437	101928386	LOC101928386	4.35165	5.49973e-06	TRUE	0.469701	0.905488	FALSE	5.11682	5.94911e-11	TRUE	-3.88195	2.20116e-06	TRUE	0.765169	0.286609	FALSE	4.64712	2.23021e-12	TRUE
chr5_148186324_148186588	chr5	148186324	148186588	+	Intergenic	-16338	404203	SPINK6	4.06971	6.43476e-05	TRUE	2.14259	0.299026	FALSE	4.85225	3.77011e-09	TRUE	-1.92712	0.0097431	TRUE	0.782537	0.326866	FALSE	2.70966	8.18228e-07	TRUE
chr12_4496506_4496749	chr12	4496506	4496749	+	intron (NM_001304811, intron 11 of 13)	41881	57102	C12orf4	4.35031	4.33742e-06	TRUE	-0.35908	0.936341	FALSE	4.70769	1.84036e-08	TRUE	-4.70939	2.00271e-07	TRUE	0.357375	0.705841	FALSE	5.06677	2.10131e-10	TRUE
chr4_55574344_55574591	chr4	55574344	55574591	+	intron (NM_152401, intron 3 of 5)	17745	132954	PDCL2	4.35031	4.33742e-06	TRUE	1.92909	0.381814	FALSE	4.77922	6.65785e-09	TRUE	-2.42122	0.00032319	TRUE	0.428909	0.625516	FALSE	2.85013	4.42619e-07	TRUE
chr12_49451925_49452143	chr12	49451925	49452143	+	intron (NM_001293285, intron 3 of 14)	62860	100335030	LOC100335030	4.82491	1.54446e-08	TRUE	1.67917	0.48556	FALSE	4.84731	2.51444e-09	TRUE	-3.14574	2.37518e-07	TRUE	0.0224044	0.984907	FALSE	3.16815	3.91869e-08	TRUE
chr7_7721253_7721499	chr7	7721253	7721499	+	intron (NM_001302350, intron 3 of 4)	-2769	6119	RPA3	4.3503	4.33742e-06	TRUE	3.00865	0.0536408	FALSE	4.593	8.2032e-08	TRUE	-1.34165	0.0377493	TRUE	0.242702	0.821437	FALSE	1.58435	0.00240381	TRUE
chr18_47284707_47285019	chr18	47284707	47285019	+	promoter-TSS (NR_147192)	-861	110175910	MIR4527HG	4.06697	7.16485e-05	TRUE	3.61904	0.00582718	TRUE	4.83994	5.81787e-09	TRUE	-0.447932	0.663573	FALSE	0.772967	0.346119	FALSE	1.2209	0.0113914	TRUE
chr6_156958235_156958413	chr6	156958235	156958413	+	intron (NM_020732, intron 5 of 19)	-178593	100616154	MIR4466	3.71986	0.000882298	TRUE	2.3262	0.236137	FALSE	4.83169	1.26429e-08	TRUE	-1.39366	0.126656	FALSE	1.11182	0.180103	FALSE	2.50549	8.11313e-06	TRUE
chr12_121551823_121552031	chr12	121551823	121552031	+	intron (NM_001005366, intron 4 of 22)	28532	84678	KDM2B	4.3503	4.33742e-06	TRUE	0.470256	0.905488	FALSE	4.46831	3.72113e-07	TRUE	-3.88004	1.61697e-06	TRUE	0.118014	0.922172	FALSE	3.99806	8.82887e-08	TRUE
chr4_113524089_113524429	chr4	113524089	113524429	+	intron (NM_001321590, intron 8 of 18)	231420	287	ANK2	4.58263	5.83586e-07	TRUE	1.67879	0.48743	FALSE	4.82179	8.69208e-09	TRUE	-2.90384	1.34358e-05	TRUE	0.239164	0.819774	FALSE	3.143	1.59393e-07	TRUE
chr6_37952106_37952316	chr6	37952106	37952316	+	intron (NM_021943, intron 2 of 5)	132680	60685	ZFAND3	4.34449	8.11231e-06	TRUE	1.67969	0.487995	FALSE	4.85377	8.5814e-09	TRUE	-2.6648	0.000222137	TRUE	0.50927	0.574144	FALSE	3.17407	1.60719e-07	TRUE
chr9_34454907_34455122	chr9	34454907	34455122	+	intron (NM_001184945, intron 1 of 5)	3556	203259	FAM219A	3.83586	4.63213e-06	TRUE	1.9038	0.239157	FALSE	4.81499	4.0105e-12	TRUE	-1.93206	0.00254818	TRUE	0.979132	0.173889	FALSE	2.91119	4.89371e-09	TRUE
chr2_203886830_203887105	chr2	203886830	203887105	+	Intergenic	19179	1493	CTLA4	4.3503	4.33742e-06	TRUE	1.67919	0.485485	FALSE	4.81395	4.02429e-09	TRUE	-2.67111	0.000112323	TRUE	0.463649	0.585113	FALSE	3.13475	6.54581e-08	TRUE
chr11_112172418_112172668	chr11	112172418	112172668	+	TTS (NM_031275)	-2942	83875	BCO2	4.44759	5.13934e-10	TRUE	1.76868	0.286077	FALSE	4.81393	1.30009e-13	TRUE	-2.67892	1.91927e-07	TRUE	0.366335	0.623942	FALSE	3.04525	4.66678e-11	TRUE
chr15_38560694_38560908	chr15	38560694	38560908	+	intron (NM_001128602, intron 1 of 15)	4005	10125	RASGRP1	3.25751	0.00769044	TRUE	0.993559	0.753155	FALSE	4.81384	4.02562e-09	TRUE	-2.26395	0.0369986	TRUE	1.55633	0.0399234	TRUE	3.82028	2.67331e-09	TRUE
chr14_65438223_65438557	chr14	65438223	65438557	+	intron (NR_038170, intron 1 of 10)	25660	2530	FUT8	3.36234	0.00484994	TRUE	3.93718	0.000777724	TRUE	4.81371	4.52733e-09	TRUE	0.57484	0.562444	FALSE	1.45137	0.0596251	FALSE	0.87653	0.0601488	FALSE
chrX_119818709_119819040	chrX	119818709	119819040	+	Intergenic	-27215	6170	RPL39	3.93942	0.000155989	TRUE	2.14202	0.297822	FALSE	4.81327	4.34767e-09	TRUE	-1.79741	0.0208345	TRUE	0.873845	0.260428	FALSE	2.67125	9.35823e-07	TRUE
chr12_123811933_123812331	chr12	123811933	123812331	+	intron (NM_207437, intron 18 of 77)	49637	196385	DNAH10	4.35324	1.18614e-05	TRUE	0.992421	0.75499	FALSE	4.81321	3.75002e-08	TRUE	-3.36082	2.85887e-05	TRUE	0.459975	0.650929	FALSE	3.82079	4.31855e-08	TRUE
chr3_179630758_179631113	chr3	179630758	179631113	+	Intergenic	-22210	8975	USP13	4.74955	4.91753e-08	TRUE	3.11338	0.0395839	TRUE	4.81278	4.82355e-09	TRUE	-1.63617	0.00243945	TRUE	0.0632345	0.956369	FALSE	1.6994	0.000482209	TRUE
chr15_43441475_43441669	chr15	43441475	43441669	+	exon (NM_005657, exon 15 of 28)	51599	7158	TP53BP1	4.34072	4.97097e-10	TRUE	1.77097	0.279333	FALSE	3.97794	3.48588e-08	TRUE	-2.56975	1.91017e-07	TRUE	-0.362786	0.64033	FALSE	2.20697	1.65641e-05	TRUE
chr12_121036807_121037083	chr12	121036807	121037083	+	intron (NM_001261825, intron 1 of 3)	2297	8638	OASL	4.31627	3.18342e-09	TRUE	2.1396	0.142484	FALSE	4.98408	1.54103e-15	TRUE	-2.17666	1.57835e-05	TRUE	0.667812	0.269436	FALSE	2.84448	1.49045e-11	TRUE
chr10_124976193_124976530	chr10	124976193	124976530	+	intron (NM_017580, intron 5 of 8)	34238	54764	ZRANB1	3.63755	0.00127164	TRUE	1.37715	0.610628	FALSE	4.80597	9.33468e-09	TRUE	-2.2604	0.0146454	TRUE	1.16843	0.146581	FALSE	3.42882	4.00057e-08	TRUE
chr10_16661478_16661966	chr10	16661478	16661966	+	intron (NM_152724, intron 7 of 7)	-139717	389941	C1QL3	4.21029	5.62127e-08	TRUE	3.45567	0.000544351	TRUE	4.79608	1.92391e-12	TRUE	-0.754615	0.236889	FALSE	0.585789	0.436673	FALSE	1.3404	0.00155544	TRUE
chr4_110296953_110297279	chr4	110296953	110297279	+	Intergenic	-98452	79071	ELOVL6	4.30339	1.20809e-05	TRUE	0.471468	0.905488	FALSE	5.2653	1.46846e-11	TRUE	-3.83192	5.89098e-06	TRUE	0.961906	0.173025	FALSE	4.79383	4.47026e-13	TRUE
chr4_121200838_121201230	chr4	121200838	121201230	+	intron (NM_001128843, intron 2 of 12)	15593	79931	TNIP3	4.29374	1.66242e-08	TRUE	1.05598	0.633846	FALSE	4.79038	1.88233e-12	TRUE	-3.23776	8.51464e-08	TRUE	0.496637	0.516723	FALSE	3.7344	4.23331e-12	TRUE
chr9_34486666_34486922	chr9	34486666	34486922	+	intron (NM_001281428, intron 4 of 19)	28042	27019	DNAI1	4.78956	6.07425e-08	TRUE	2.6392	0.136772	FALSE	4.78973	1.62848e-08	TRUE	-2.15036	0.000173486	TRUE	0.000171654	0.999899	FALSE	2.15053	6.51813e-05	TRUE
chr13_42601004_42601261	chr13	42601004	42601261	+	intron (NM_033012, intron 6 of 6)	26977	8600	TNFSF11	4.06916	5.61524e-05	TRUE	2.14206	0.297481	FALSE	4.77931	6.65785e-09	TRUE	-1.9271	0.00866781	TRUE	0.710152	0.378718	FALSE	2.63725	1.4658e-06	TRUE
chr14_90970154_90970445	chr14	90970154	90970445	+	intron (NM_001322238, intron 1 of 14)	89835	9252	RPS6KA5	3.63839	0.00113005	TRUE	1.37673	0.60972	FALSE	4.77931	6.65785e-09	TRUE	-2.26166	0.0128932	TRUE	1.14092	0.142405	FALSE	3.40258	2.56978e-08	TRUE
chr19_12112796_12113098	chr19	12112796	12113098	+	exon (NM_001348164, exon 2 of 2)	20684	388507	ZNF788P	4.30172	1.20528e-05	TRUE	2.14102	0.302315	FALSE	4.79139	1.90376e-08	TRUE	-2.16071	0.00209411	TRUE	0.489668	0.6	FALSE	2.65037	4.3088e-06	TRUE
chr11_117062579_117062829	chr11	117062579	117062829	+	intron (NM_001281749, intron 1 of 23)	35711	23387	SIK3	4.29833	8.26421e-06	TRUE	3.61901	0.00543278	TRUE	5.32363	8.38741e-13	TRUE	-0.679318	0.389755	FALSE	1.02531	0.102706	FALSE	1.70462	2.41438e-05	TRUE
chr8_125152235_125152517	chr8	125152235	125152517	+	intron (NM_001349485, intron 3 of 6)	60553	286053	NSMCE2	4.05886	2.30921e-07	TRUE	2.4373	0.0696004	FALSE	4.77661	9.68999e-13	TRUE	-1.62156	0.0039397	TRUE	0.717752	0.302218	FALSE	2.33931	1.23452e-07	TRUE
chr8_64863509_64863829	chr8	64863509	64863829	+	Intergenic	-64878	9420	CYP7B1	4.28701	4.29472e-08	TRUE	0.502027	0.86316	FALSE	4.272	1.46851e-08	TRUE	-3.78498	1.66599e-08	TRUE	-0.0150106	0.990958	FALSE	3.76997	5.86977e-09	TRUE
chr22_43520655_43521035	chr22	43520655	43521035	+	intron (NR_046563, intron 2 of 2)	4591	100874197	EFCAB6-AS1	3.97207	9.41735e-07	TRUE	1.8984	0.239157	FALSE	4.77386	3.70559e-12	TRUE	-2.07366	0.000592102	TRUE	0.801795	0.264364	FALSE	2.87546	4.19145e-09	TRUE
chr9_131645182_131645468	chr9	131645182	131645468	+	intron (NM_198679, intron 3 of 23)	64517	2889	RAPGEF1	4.27673	8.02435e-09	TRUE	0.506537	0.860576	FALSE	5.01408	1.85408e-15	TRUE	-3.77019	2.22402e-09	TRUE	0.737351	0.226021	FALSE	4.50755	3.75793e-17	TRUE
chr7_139672841_139672976	chr7	139672841	139672976	+	intron (NM_001113239, intron 2 of 14)	104986	28996	HIPK2	3.63782	0.00121971	TRUE	2.32768	0.232809	FALSE	4.74899	1.65343e-08	TRUE	-1.31014	0.159901	FALSE	1.11117	0.171275	FALSE	2.42131	1.09126e-05	TRUE
chr17_30173732_30174024	chr17	30173732	30174024	+	intron (NM_001261467, intron 2 of 5)	-56718	100423003	MIR3184	4.25547	2.92073e-12	TRUE	1.98023	0.10591	FALSE	4.05091	3.10213e-11	TRUE	-2.27524	7.81504e-08	TRUE	-0.204561	0.799921	FALSE	2.07068	9.64163e-07	TRUE
chr4_121278729_121279156	chr4	121278729	121279156	+	Intergenic	-51476	79931	TNIP3	4.24852	9.01246e-09	TRUE	1.27345	0.524445	FALSE	4.8428	3.88249e-14	TRUE	-2.97507	1.47241e-07	TRUE	0.594275	0.363352	FALSE	3.56935	2.18795e-13	TRUE
chr3_48084968_48085103	chr3	48084968	48085103	+	intron (NM_001134364, intron 1 of 17)	4244	4134	MAP4	4.66979	1.20554e-07	TRUE	-2.52323	0.50012	FALSE	4.74394	1.10093e-08	TRUE	-7.19302	7.32489e-11	TRUE	0.0741565	0.949319	FALSE	7.26718	2.96405e-12	TRUE
chr17_41987649_41988105	chr17	41987649	41988105	+	exon (NM_001144766, exon 9 of 14)	20159	1267	CNP	4.23769	2.41329e-10	TRUE	1.80158	0.182094	FALSE	4.70395	1.31622e-14	TRUE	-2.43611	9.59862e-07	TRUE	0.466255	0.528655	FALSE	2.90237	9.27386e-11	TRUE
chr4_83224353_83224617	chr4	83224353	83224617	+	Intergenic	60310	27235	COQ2	5.09232	2.36692e-10	TRUE	1.37667	0.609805	FALSE	4.74366	1.18108e-08	TRUE	-3.71565	5.42614e-10	TRUE	-0.348658	0.664723	FALSE	3.36699	4.97619e-08	TRUE
chr5_151451869_151452053	chr5	151451869	151452053	+	intron (NM_001349740, intron 1 of 11)	4365	206358	SLC36A1	4.24446	1.28427e-05	TRUE	3.21095	0.028879	TRUE	4.74286	1.27826e-08	TRUE	-1.03351	0.14771	FALSE	0.498399	0.567937	FALSE	1.53191	0.00188739	TRUE
chr3_138513598_138513759	chr3	138513598	138513759	+	intron (NM_001288967, intron 7 of 13)	78278	80321	CEP70	3.5508	0.00198429	TRUE	2.32788	0.232877	FALSE	4.74049	1.85572e-08	TRUE	-1.22292	0.214359	FALSE	1.18969	0.144596	FALSE	2.41261	1.21777e-05	TRUE
chr1_25473631_25474104	chr1	25473631	25474104	+	intron (NM_018202, intron 6 of 10)	43009	55219	MACO1	4.36796	8.66488e-10	TRUE	2.1413	0.140196	FALSE	4.73511	1.55258e-13	TRUE	-2.22665	4.9826e-06	TRUE	0.367154	0.607504	FALSE	2.59381	1.56803e-09	TRUE
chr16_23842280_23842616	chr16	23842280	23842616	+	intron (NM_212535, intron 2 of 16)	6469	5579	PRKCB	4.12945	1.77432e-16	TRUE	2.13596	0.0139666	TRUE	4.72759	1.74715e-26	TRUE	-1.99349	7.3456e-09	TRUE	0.598144	0.178701	FALSE	2.59164	9.70304e-18	TRUE
chr1_89046456_89047014	chr1	89046456	89047014	+	Intergenic	18625	2633	GBP1	4.23013	4.39126e-11	TRUE	1.36677	0.3805	FALSE	4.74523	1.60351e-16	TRUE	-2.86336	5.25128e-09	TRUE	0.515101	0.423539	FALSE	3.37846	1.24951e-14	TRUE
chr11_58505838_58506139	chr11	58505838	58506139	+	Intergenic	2117	219968	OR5B21	4.63765	4.32601e-10	TRUE	2.03111	0.191146	FALSE	4.72381	3.47189e-11	TRUE	-2.60655	1.04214e-06	TRUE	0.0861544	0.941613	FALSE	2.6927	1.0813e-07	TRUE
chr19_12899901_12900418	chr19	12899901	12900418	+	TTS (NM_013976)	9030	2639	GCDH	4.24753	1.02915e-08	TRUE	1.90233	0.230731	FALSE	4.72158	6.51061e-13	TRUE	-2.3452	9.15688e-06	TRUE	0.474052	0.504991	FALSE	2.81925	7.44545e-10	TRUE
chr16_47073653_47073998	chr16	47073653	47073998	+	Intergenic	70200	81831	NETO2	4.22715	8.61277e-09	TRUE	0.80974	0.742906	FALSE	4.49676	2.11674e-11	TRUE	-3.41741	1.02983e-08	TRUE	0.269608	0.752029	FALSE	3.68702	1.14657e-11	TRUE
chr1_172756156_172756400	chr1	172756156	172756400	+	Intergenic	97270	356	FASLG	4.38876	1.87656e-09	TRUE	1.62497	0.35312	FALSE	4.70912	1.88233e-12	TRUE	-2.76378	2.67364e-07	TRUE	0.320361	0.696926	FALSE	3.08415	2.44542e-10	TRUE
chr19_2595866_2596012	chr19	2595866	2596012	+	intron (NM_052847, intron 2 of 4)	-34776	102465838	MIR7850	3.79564	0.000445649	TRUE	2.89553	0.0743219	FALSE	4.70772	2.26512e-08	TRUE	-0.900118	0.333133	FALSE	0.912075	0.264718	FALSE	1.81219	0.00043451	TRUE
chr3_114632912_114633320	chr3	114632912	114633320	+	intron (NM_001348803, intron 6 of 13)	-8171	26137	ZBTB20	4.22174	1.23969e-08	TRUE	3.50929	0.000210971	TRUE	5.17202	1.31782e-17	TRUE	-0.712445	0.219383	FALSE	0.950278	0.0767455	FALSE	1.66272	1.53893e-06	TRUE
chr12_38775579_38775747	chr12	38775579	38775747	+	intron (NM_153634, intron 7 of 19)	129955	144402	CPNE8	3.63836	0.00113005	TRUE	1.92908	0.381814	FALSE	4.70764	1.84046e-08	TRUE	-1.70927	0.0563171	FALSE	1.06928	0.182809	FALSE	2.77855	1.29265e-06	TRUE
chr11_7467687_7468032	chr11	7467687	7468032	+	3' UTR (NM_175733, exon 7 of 7)	-2024	100506258	LOC100506258	4.19068	1.55255e-08	TRUE	2.43219	0.0653579	FALSE	4.56025	7.73633e-12	TRUE	-1.75849	0.000490799	TRUE	0.369571	0.633702	FALSE	2.12806	8.63668e-07	TRUE
chr12_66047373_66047749	chr12	66047373	66047749	+	Intergenic	-16495	105369810	LINC02425	4.18505	3.36116e-05	TRUE	0.994044	0.753856	FALSE	4.83018	1.26234e-08	TRUE	-3.191	9.1015e-05	TRUE	0.64513	0.461584	FALSE	3.83613	1.15882e-08	TRUE
chr6_10685298_10685666	chr6	10685298	10685666	+	intron (NM_001354357, intron 2 of 5)	9127	347744	C6orf52	4.16624	6.70327e-08	TRUE	1.61901	0.358341	FALSE	4.38419	9.49839e-10	TRUE	-2.54723	9.57765e-06	TRUE	0.217946	0.830268	FALSE	2.76517	1.48143e-07	TRUE
chr6_15023360_15023755	chr6	15023360	15023755	+	Intergenic	-222418	3720	JARID2	4.16497	6.8927e-17	TRUE	1.43933	0.196987	FALSE	4.48204	2.41571e-22	TRUE	-2.72564	2.3709e-13	TRUE	0.317068	0.56096	FALSE	3.04271	7.69819e-19	TRUE
chr12_12899562_12899898	chr12	12899562	12899898	+	intron (NM_003979, intron 1 of 3)	8708	9052	GPRC5A	3.57928	1.369e-05	TRUE	0.810057	0.741591	FALSE	4.67959	9.60649e-14	TRUE	-2.76922	4.60803e-05	TRUE	1.10031	0.0549213	FALSE	3.86953	1.78373e-14	TRUE
chr1_157400050_157400355	chr1	157400050	157400355	+	Intergenic	152318	83416	FCRL5	4.13964	9.85549e-14	TRUE	1.58746	0.186344	FALSE	4.13655	1.39475e-14	TRUE	-2.55218	4.54479e-10	TRUE	-0.00309207	0.997184	FALSE	2.54909	9.06712e-11	TRUE
chr5_139414715_139414972	chr5	139414715	139414972	+	intron (NM_152686, intron 7 of 7)	-10756	202051	SPATA24	4.58696	4.78243e-07	TRUE	2.89548	0.0756522	FALSE	4.67467	4.69279e-08	TRUE	-1.69148	0.00434323	TRUE	0.0877084	0.942768	FALSE	1.77919	0.000781196	TRUE
chr10_11505637_11505860	chr10	11505637	11505860	+	intron (NM_001080491, intron 5 of 13)	26532	9712	USP6NL	3.93881	0.00016574	TRUE	3.30243	0.0212979	TRUE	4.67258	3.74824e-08	TRUE	-0.63638	0.508221	FALSE	0.73377	0.391998	FALSE	1.37015	0.00669261	TRUE
chr10_99927989_99928221	chr10	99927989	99928221	+	intron (NR_024130, intron 1 of 4)	900	100188954	DNMBP-AS1	4.0677	6.33012e-05	TRUE	2.49148	0.175057	FALSE	4.6718	4.04782e-08	TRUE	-1.57621	0.0336906	TRUE	0.604105	0.49324	FALSE	2.18032	6.65184e-05	TRUE
chr8_125154749_125154920	chr8	125154749	125154920	+	intron (NM_001349485, intron 3 of 6)	63011	286053	NSMCE2	4.12962	3.48146e-05	TRUE	3.38828	0.0148611	TRUE	4.67054	3.23517e-08	TRUE	-0.741342	0.369237	FALSE	0.540912	0.539411	FALSE	1.28225	0.00997067	TRUE
chr1_88868522_88868732	chr1	88868522	88868732	+	intron (NM_001514, intron 2 of 6)	22991	2959	GTF2B	4.13044	3.75895e-05	TRUE	2.14164	0.298869	FALSE	4.54978	1.75928e-07	TRUE	-1.9888	0.00604539	TRUE	0.419333	0.675868	FALSE	2.40814	4.17017e-05	TRUE
chr6_71292157_71292373	chr6	71292157	71292373	+	intron (NM_024576, intron 1 of 6)	3823	79627	OGFRL1	4.12995	3.37454e-05	TRUE	0.47025	0.905488	FALSE	4.63213	4.98498e-08	TRUE	-3.6597	1.94328e-05	TRUE	0.502175	0.580016	FALSE	4.16188	7.83222e-09	TRUE
chr8_42306804_42307042	chr8	42306804	42307042	+	intron (NM_001190720, intron 6 of 20)	-31532	5423	POLB	3.63748	0.0012848	TRUE	3.87792	0.0013767	TRUE	4.66853	5.99975e-08	TRUE	0.240433	0.851759	FALSE	1.03105	0.22734	FALSE	0.790618	0.125419	FALSE
chr1_161386654_161386824	chr1	161386654	161386824	+	Intergenic	-18856	257177	CFAP126	4.63571	4.63738e-07	TRUE	2.32941	0.235657	FALSE	4.6675	9.20782e-08	TRUE	-2.30631	0.000227631	TRUE	0.0317841	0.981633	FALSE	2.33809	5.83487e-05	TRUE
chr17_31878487_31878901	chr17	31878487	31878901	+	intron (NM_018428, intron 12 of 18)	-19387	55352	COPRS	3.02341	0.0200922	TRUE	3.11395	0.0406039	TRUE	4.66606	5.20028e-08	TRUE	0.0905396	0.962661	FALSE	1.64265	0.0527029	FALSE	1.55211	0.00289975	TRUE
chr13_46526843_46527078	chr13	46526843	46527078	+	Intergenic	-26201	23143	LRCH1	4.52828	6.827e-11	TRUE	1.45748	0.431888	FALSE	4.65815	1.04634e-12	TRUE	-3.0708	2.40376e-09	TRUE	0.12987	0.88903	FALSE	3.20067	3.32404e-11	TRUE
chr14_78007205_78007472	chr14	78007205	78007472	+	Intergenic	-163035	9369	NRXN3	4.12809	4.09686e-05	TRUE	1.67831	0.48672	FALSE	4.94107	1.08906e-09	TRUE	-2.44978	0.00116143	TRUE	0.81298	0.289065	FALSE	3.26276	1.55031e-08	TRUE
chr2_16725595_16725955	chr2	16725595	16725955	+	Intergenic	-59909	81553	FAM49A	4.12756	1.76519e-07	TRUE	3.17593	0.00374843	TRUE	5.1665	2.61732e-15	TRUE	-0.951634	0.124706	FALSE	1.03894	0.0986702	FALSE	1.99057	9.40186e-07	TRUE
chr15_50260370_50260774	chr15	50260370	50260774	+	intron (NM_001306146, intron 2 of 10)	5393	3067	HDC	4.10729	7.23657e-11	TRUE	1.60099	0.255181	FALSE	4.44092	1.11344e-14	TRUE	-2.50629	5.94409e-08	TRUE	0.333628	0.629778	FALSE	2.83992	1.04921e-11	TRUE
chr3_41608374_41608617	chr3	41608374	41608617	+	intron (NR_136342, intron 29 of 34)	353945	54986	ULK4	4.34926	6.36406e-06	TRUE	0.469712	0.905488	FALSE	4.64161	8.59943e-08	TRUE	-3.87955	2.6581e-06	TRUE	0.292355	0.786669	FALSE	4.1719	1.62019e-08	TRUE
chr10_61812112_61812333	chr10	61812112	61812333	+	Intergenic	-89032	84159	ARID5B	4.07758	0.000116628	TRUE	4.20073	0.000248143	TRUE	4.5992	4.68147e-07	TRUE	0.123151	0.926868	FALSE	0.521614	0.629827	FALSE	0.398463	0.519578	FALSE
chr4_36081236_36081527	chr4	36081236	36081527	+	intron (NM_015230, intron 30 of 32)	162558	116984	ARAP2	4.19301	7.3836e-09	TRUE	1.62287	0.346679	FALSE	4.63629	3.87745e-13	TRUE	-2.57013	1.05946e-06	TRUE	0.44328	0.505983	FALSE	3.01341	4.02463e-11	TRUE
chr13_94667173_94667508	chr13	94667173	94667508	+	Intergenic	41146	101927248	LOC101927248	4.39904	3.20248e-06	TRUE	3.99277	0.000552042	TRUE	4.63406	6.68627e-08	TRUE	-0.406267	0.651329	FALSE	0.235026	0.827059	FALSE	0.641293	0.213123	FALSE
chr16_1996289_1996454	chr16	1996289	1996454	+	Intergenic	6426	9143	SYNGR3	4.54139	5.87043e-07	TRUE	0.993446	0.753155	FALSE	4.63304	5.34883e-08	TRUE	-3.54795	8.27905e-07	TRUE	0.0916432	0.937575	FALSE	3.63959	5.63135e-08	TRUE
chr17_28892128_28892252	chr17	28892128	28892252	+	intron (NM_001330170, intron 1 of 10)	5507	2319	FLOT2	3.93935	0.00015347	TRUE	2.14206	0.297481	FALSE	4.63225	4.98289e-08	TRUE	-1.79729	0.0205807	TRUE	0.692903	0.423539	FALSE	2.49019	1.17767e-05	TRUE
chr1_89299799_89300071	chr1	89299799	89300071	+	Intergenic	-9573	729930	LOC729930	4.29832	7.22375e-06	TRUE	1.92911	0.381814	FALSE	4.63218	4.98445e-08	TRUE	-2.36921	0.0005395	TRUE	0.333857	0.737955	FALSE	2.70307	3.79355e-06	TRUE
chr5_61342116_61342450	chr5	61342116	61342450	+	intron (NM_020928, intron 1 of 13)	10010	57688	ZSWIM6	4.06991	7.30176e-05	TRUE	2.77261	0.102413	FALSE	4.75351	2.20898e-08	TRUE	-1.2973	0.0915133	FALSE	0.683598	0.433804	FALSE	1.9809	0.000193921	TRUE
chr11_19970066_19970213	chr11	19970066	19970213	+	intron (NM_182964, intron 10 of 37)	-52417	89797	NAV2	4.4002	2.82839e-06	TRUE	3.00845	0.0540983	FALSE	4.63086	5.73085e-08	TRUE	-1.39175	0.0282835	TRUE	0.230658	0.827962	FALSE	1.62241	0.00179763	TRUE
chr21_31426386_31426726	chr21	31426386	31426726	+	intron (NM_001353690, intron 1 of 27)	-82202	7074	TIAM1	4.24516	1.50409e-05	TRUE	3.61805	0.00566768	TRUE	4.63069	7.83945e-08	TRUE	-0.627112	0.457952	FALSE	0.385525	0.700375	FALSE	1.01264	0.0492906	TRUE
chr10_34282329_34282583	chr10	34282329	34282583	+	intron (NM_001184789, intron 19 of 22)	-509776	100505583	LINC00838	4.58475	4.87421e-07	TRUE	1.67919	0.486589	FALSE	4.6271	8.26088e-08	TRUE	-2.90556	1.09569e-05	TRUE	0.0423443	0.974913	FALSE	2.9479	1.8951e-06	TRUE
chr1_36458965_36459157	chr1	36458965	36459157	+	intron (NM_031280, intron 5 of 7)	5378	64960	MRPS15	4.06185	8.80731e-05	TRUE	2.14047	0.302773	FALSE	4.62592	1.42612e-07	TRUE	-1.92138	0.0123298	TRUE	0.564066	0.560153	FALSE	2.48545	3.30784e-05	TRUE
chr11_128580743_128580973	chr11	128580743	128580973	+	intron (NM_001143820, intron 1 of 9)	6700	2113	ETS1	4.06976	6.13486e-05	TRUE	3.30206	0.0213291	TRUE	4.50881	2.80266e-07	TRUE	-0.767698	0.366855	FALSE	0.439056	0.663713	FALSE	1.20675	0.0241834	TRUE
chr9_117682948_117683259	chr9	117682948	117683259	+	Intergenic	-21072	7099	TLR4	4.06588	7.86868e-08	TRUE	0.507494	0.860035	FALSE	4.64221	1.12754e-12	TRUE	-3.55838	2.93607e-08	TRUE	0.576334	0.393573	FALSE	4.13472	5.8586e-14	TRUE
chr6_15301275_15301493	chr6	15301275	15301493	+	intron (NM_001267040, intron 1 of 17)	52529	3720	JARID2	3.71715	5.26561e-08	TRUE	1.80404	0.167291	FALSE	4.60251	3.41903e-16	TRUE	-1.91311	0.000149923	TRUE	0.885368	0.106742	FALSE	2.79848	2.4626e-12	TRUE
chr12_92990090_92990358	chr12	92990090	92990358	+	Intergenic	-60893	8411	EEA1	4.03508	2.41329e-10	TRUE	2.06147	0.0840647	FALSE	4.6003	1.8712e-16	TRUE	-1.97361	1.00665e-05	TRUE	0.56522	0.331265	FALSE	2.53883	2.70307e-11	TRUE
chr12_96247678_96247922	chr12	96247678	96247922	+	intron (NM_005230, intron 3 of 4)	-7660	2004	ELK3	3.94481	0.000200441	TRUE	2.32911	0.235216	FALSE	4.60023	1.76669e-07	TRUE	-1.6157	0.0455801	TRUE	0.655419	0.487701	FALSE	2.27112	0.000109897	TRUE
chr10_27101506_27101779	chr10	27101506	27101779	+	Intergenic	-1144	22852	ANKRD26	4.06338	4.2785e-08	TRUE	0.507697	0.859519	FALSE	3.94534	5.49488e-08	TRUE	-3.55568	1.35052e-08	TRUE	-0.118041	0.909084	FALSE	3.43764	2.1826e-08	TRUE
chr9_77304577_77304813	chr9	77304577	77304813	+	intron (NM_001018037, intron 33 of 70)	-126778	100286938	VPS13A-AS1	4.63036	3.38845e-07	TRUE	0.469729	0.905488	FALSE	4.59905	1.39089e-07	TRUE	-4.16063	7.1855e-08	TRUE	-0.0313062	0.98155	FALSE	4.12932	2.86453e-08	TRUE
chr1_12518932_12519363	chr1	12518932	12519363	+	Intergenic	11901	677882	SNORA59B	4.05781	5.31531e-13	TRUE	0.837747	0.615003	FALSE	4.35121	4.93491e-17	TRUE	-3.22007	1.65237e-12	TRUE	0.293392	0.652638	FALSE	3.51346	5.81823e-17	TRUE
chr12_104084152_104084469	chr12	104084152	104084469	+	intron (NM_013320, intron 7 of 14)	19852	29915	HCFC2	4.89816	9.56318e-09	TRUE	0.993484	0.75337	FALSE	4.5963	1.25386e-07	TRUE	-3.90468	6.48244e-09	TRUE	-0.301858	0.75151	FALSE	3.60282	1.57958e-07	TRUE
chr6_13715415_13715638	chr6	13715415	13715638	+	Intergenic	-3962	10048	RANBP9	4.03084	4.4814e-10	TRUE	0.921118	0.624089	FALSE	4.52725	3.55826e-15	TRUE	-3.10973	2.33939e-09	TRUE	0.496404	0.435964	FALSE	3.60613	5.38823e-15	TRUE
chrX_149573505_149573799	chrX	149573505	149573799	+	Intergenic	13800	4108	MAGEA9	4.06903	5.85854e-05	TRUE	2.14183	0.298082	FALSE	4.59377	8.98937e-08	TRUE	-1.92721	0.00896328	TRUE	0.524735	0.570192	FALSE	2.45194	2.14604e-05	TRUE
chr13_51729910_51730134	chr13	51729910	51730134	+	intron (NM_052950, intron 6 of 11)	74140	79758	DHRS12	3.7975	0.000446013	TRUE	2.63905	0.133633	FALSE	4.59315	1.02479e-07	TRUE	-1.15844	0.185139	FALSE	0.795655	0.367729	FALSE	1.9541	0.000362158	TRUE
chr8_81063089_81063216	chr8	81063089	81063216	+	intron (NM_018440, intron 2 of 8)	48916	55824	PAG1	3.86978	0.000255749	TRUE	2.7733	0.0991463	FALSE	4.59305	8.2032e-08	TRUE	-1.09648	0.193494	FALSE	0.72327	0.408084	FALSE	1.81975	0.000646922	TRUE
chr4_113540917_113541136	chr4	113540917	113541136	+	intron (NM_001321578, intron 5 of 17)	220901	817	CAMK2D	3.71961	0.000695936	TRUE	2.49191	0.173981	FALSE	4.59305	8.42184e-08	TRUE	-1.2277	0.168781	FALSE	0.873438	0.308117	FALSE	2.10114	0.000135586	TRUE
chr13_77477392_77477518	chr13	77477392	77477518	+	Intergenic	-58219	8796	SCEL	3.55212	0.00183658	TRUE	1.37671	0.60972	FALSE	4.59303	8.2032e-08	TRUE	-2.17541	0.0208174	TRUE	1.04092	0.216902	FALSE	3.21632	4.62854e-07	TRUE
chr13_80037843_80038174	chr13	80037843	80038174	+	Intergenic	26931	101515984	LINC01080	4.02611	1.59418e-07	TRUE	1.77155	0.283602	FALSE	4.42192	1.12101e-10	TRUE	-2.25456	5.67439e-05	TRUE	0.395811	0.625516	FALSE	2.65037	5.10131e-08	TRUE
chr13_48884315_48884578	chr13	48884315	48884578	+	Intergenic	-91466	22862	FNDC3A	3.7222	0.00079266	TRUE	4.80946	2.02603e-07	TRUE	4.59148	1.52795e-07	TRUE	1.08726	0.0577117	FALSE	0.86928	0.334281	FALSE	-0.217978	0.693797	FALSE
chr14_103115161_103115417	chr14	103115161	103115417	+	Intergenic	7620	105370683	LINC00677	4.40276	3.60701e-06	TRUE	2.89543	0.0759772	FALSE	4.58929	1.41047e-07	TRUE	-1.50733	0.0195946	TRUE	0.186524	0.872653	FALSE	1.69386	0.00187916	TRUE
chr5_154513656_154514004	chr5	154513656	154514004	+	Intergenic	-35566	9421	HAND1	4.01263	2.25076e-10	TRUE	0.272617	0.917729	FALSE	4.14598	3.4567e-12	TRUE	-3.74002	1.60149e-11	TRUE	0.133341	0.881827	FALSE	3.87336	9.60379e-14	TRUE
chr1_1417940_1418138	chr1	1417940	1418138	+	TTS (NM_001243536)	3405	441869	ANKRD65	5.15245	1.96895e-10	TRUE	1.37628	0.610714	FALSE	4.58538	1.43907e-07	TRUE	-3.77618	4.71167e-10	TRUE	-0.567077	0.448361	FALSE	3.2091	8.90132e-07	TRUE
chr15_43735149_43735435	chr15	43735149	43735435	+	TTS (NR_002318)	11006	440278	CATSPER2P1	4.63686	5.33524e-07	TRUE	2.1433	0.302916	FALSE	4.5817	2.85468e-07	TRUE	-2.49356	0.000103928	TRUE	-0.0551583	0.967843	FALSE	2.4384	6.71359e-05	TRUE
chr3_131470339_131470635	chr3	131470339	131470635	+	intron (NM_007208, intron 7 of 9)	8746	677836	SNORA58	3.9945	0.000194018	TRUE	2.49119	0.184446	FALSE	4.57391	5.83211e-07	TRUE	-1.5033	0.0696877	FALSE	0.579408	0.583765	FALSE	2.08271	0.000701672	TRUE
chr10_62002023_62002220	chr10	62002023	62002220	+	intron (NM_032199, intron 4 of 9)	-47090	84159	ARID5B	4.5393	3.65055e-10	TRUE	2.82385	0.0182544	TRUE	4.57372	4.62178e-11	TRUE	-1.71545	0.000371795	TRUE	0.0344161	0.977823	FALSE	1.74987	9.33633e-05	TRUE
chr2_181992875_181993093	chr2	181992875	181993093	+	intron (NM_001080545, intron 2 of 4)	7160	151242	PPP1R1C	4.1902	9.73149e-09	TRUE	1.90324	0.225259	FALSE	4.57055	2.51371e-12	TRUE	-2.28695	9.03797e-06	TRUE	0.380353	0.601455	FALSE	2.66731	3.03601e-09	TRUE
chr2_87630948_87631280	chr2	87630948	87631280	+	Intergenic	1354	100616341	MIR4435-2	4.41302	9.01246e-09	TRUE	1.27237	0.531679	FALSE	4.56926	2.36746e-10	TRUE	-3.14065	1.5936e-07	TRUE	0.156243	0.88989	FALSE	3.29689	3.9542e-09	TRUE
chr16_68752635_68752937	chr16	68752635	68752937	+	intron (NM_001317184, intron 2 of 14)	10270	NA		4.27904	2.39073e-12	TRUE	0.922824	0.621961	FALSE	4.56562	4.21083e-16	TRUE	-3.35622	6.02299e-12	TRUE	0.286573	0.67596	FALSE	3.64279	4.65102e-16	TRUE
chr9_125513539_125513903	chr9	125513539	125513903	+	intron (NM_001006617, intron 7 of 11)	193513	79109	MAPKAP1	3.72072	4.62812e-06	TRUE	-1.2265	0.700674	FALSE	4.56382	5.40867e-12	TRUE	-4.94722	1.77394e-08	TRUE	0.843094	0.199572	FALSE	5.79032	4.10718e-16	TRUE
chr4_144499843_144500131	chr4	144499843	144500131	+	Intergenic	-146009	64399	HHIP	4.00844	0.000114817	TRUE	1.67949	0.486944	FALSE	4.99871	5.92185e-10	TRUE	-2.32895	0.00327792	TRUE	0.990263	0.187462	FALSE	3.31921	8.09832e-09	TRUE
chr11_88357312_88357462	chr11	88357312	88357462	+	Intergenic	-19600	1075	CTSC	3.14426	0.0125511	TRUE	2.1423	0.298605	FALSE	4.55586	1.63725e-07	TRUE	-1.00197	0.42499	FALSE	1.41159	0.102769	FALSE	2.41356	3.90689e-05	TRUE
chr8_135473201_135473421	chr8	135473201	135473421	+	intron (NM_006558, intron 1 of 8)	15846	10656	KHDRBS3	4.00471	0.000102155	TRUE	0.993407	0.753175	FALSE	4.4665	4.51359e-07	TRUE	-3.01131	0.000316703	TRUE	0.461785	0.648437	FALSE	3.47309	6.90632e-07	TRUE
chr4_98602377_98602590	chr4	98602377	98602590	+	intron (NM_005723, intron 1 of 7)	56178	10098	TSPAN5	4.62823	1.99285e-07	TRUE	3.21096	0.0285159	TRUE	4.55265	1.35346e-07	TRUE	-1.41727	0.0119986	TRUE	-0.0755768	0.950644	FALSE	1.34169	0.0100547	TRUE
chr2_37570920_37571208	chr2	37570920	37571208	+	Intergenic	101135	10602	CDC42EP3	4.00574	9.3927e-05	TRUE	1.37673	0.60972	FALSE	4.55261	1.35346e-07	TRUE	-2.62901	0.000956772	TRUE	0.546875	0.553714	FALSE	3.17589	8.11199e-07	TRUE
chr6_11712959_11713103	chr6	11712959	11713103	+	TTS (NM_001143948)	66016	84830	ADTRP	4.00575	9.3927e-05	TRUE	2.63947	0.132531	FALSE	4.55261	1.35346e-07	TRUE	-1.36628	0.0726059	FALSE	0.546861	0.553714	FALSE	1.91315	0.000472531	TRUE
chr22_31538872_31539146	chr22	31538872	31539146	+	intron (NM_001007467, intron 4 of 32)	42870	9814	SFI1	3.99329	1.28979e-07	TRUE	-1.22778	0.69996	FALSE	4.77645	1.43958e-14	TRUE	-5.22108	1.58193e-10	TRUE	0.783152	0.17641	FALSE	6.00423	1.61866e-19	TRUE
chr8_130065755_130065845	chr8	130065755	130065845	+	intron (NM_001247996, intron 28 of 30)	18968	100507117	ASAP1-IT2	3.93934	0.00015347	TRUE	1.37672	0.60972	FALSE	4.55253	1.35366e-07	TRUE	-2.56262	0.00165623	TRUE	0.613182	0.497986	FALSE	3.1758	8.11199e-07	TRUE
chr18_11828910_11829037	chr18	11828910	11829037	+	intron (NM_182978, intron 5 of 11)	-22417	57132	CHMP1B	4.29821	7.27634e-06	TRUE	1.67917	0.485498	FALSE	4.55244	1.3674e-07	TRUE	-2.61905	0.000195043	TRUE	0.254232	0.815177	FALSE	2.87328	3.26911e-06	TRUE
chr6_38354986_38355227	chr6	38354986	38355227	+	intron (NM_001099272, intron 6 of 10)	-126490	101929425	BTBD9-AS1	4.2987	7.56401e-06	TRUE	2.49193	0.17419	FALSE	4.55234	1.46824e-07	TRUE	-1.80676	0.00629029	TRUE	0.253641	0.817349	FALSE	2.0604	0.000226148	TRUE
chr4_86530155_86530516	chr4	86530155	86530516	+	Intergenic	12217	100616463	MIR4452	3.99242	8.832e-08	TRUE	1.77059	0.278138	FALSE	4.16606	1.46932e-09	TRUE	-2.22182	3.32618e-05	TRUE	0.173645	0.85497	FALSE	2.39547	6.86961e-07	TRUE
chr10_17001954_17002485	chr10	17001954	17002485	+	intron (NM_001081, intron 28 of 66)	127598	8029	CUBN	3.77818	3.8971e-08	TRUE	2.83566	0.00282209	TRUE	4.54861	7.01084e-15	TRUE	-0.942521	0.0800231	FALSE	0.770432	0.206312	FALSE	1.71295	4.48956e-06	TRUE
chr11_22742155_22742543	chr11	22742155	22742543	+	intron (NM_177553, intron 5 of 7)	67576	2620	GAS2	3.9895	1.71585e-07	TRUE	0.124574	0.970927	FALSE	4.59613	1.7167e-12	TRUE	-3.86492	1.45171e-08	TRUE	0.606628	0.362706	FALSE	4.47155	1.29644e-14	TRUE
chr5_159409907_159410095	chr5	159409907	159410095	+	Intergenic	56275	285627	LINC01845	3.73732	1.2975e-05	TRUE	1.46483	0.438624	FALSE	4.5423	3.42479e-10	TRUE	-2.2725	0.00082466	TRUE	0.804973	0.318978	FALSE	3.07747	2.03569e-08	TRUE
chr6_18545167_18545537	chr6	18545167	18545537	+	intron (NR_149116, intron 3 of 7)	22605	105374956	MIR548A1HG	3.98877	8.31269e-10	TRUE	0.918106	0.624725	FALSE	3.72382	1.36214e-08	TRUE	-3.07066	4.22497e-09	TRUE	-0.264955	0.762371	FALSE	2.80571	1.08027e-07	TRUE
chr2_96489760_96489993	chr2	96489760	96489993	+	Intergenic	15509	93082	NEURL3	4.09214	9.665e-08	TRUE	1.46192	0.432588	FALSE	4.52129	4.01214e-11	TRUE	-2.63022	5.72303e-06	TRUE	0.429153	0.590018	FALSE	3.05937	1.90944e-09	TRUE
chr7_90897752_90898296	chr7	90897752	90898296	+	intron (NM_001287136, intron 5 of 13)	188208	5218	CDK14	3.98953	2.11299e-07	TRUE	2.81931	0.0157057	TRUE	4.51911	1.31579e-11	TRUE	-1.17021	0.0343102	TRUE	0.529588	0.459264	FALSE	1.6998	4.31233e-05	TRUE
chr3_153319985_153320532	chr3	153319985	153320532	+	Intergenic	158046	5912	RAP2B	4.7287	4.27125e-12	TRUE	2.43671	0.0669082	FALSE	4.51482	4.30227e-11	TRUE	-2.292	3.69843e-07	TRUE	-0.213882	0.806849	FALSE	2.07812	4.03579e-06	TRUE
chr1_168159552_168159956	chr1	168159552	168159956	+	Intergenic	-19091	261726	TIPRL	4.9303	4.44556e-09	TRUE	1.3765	0.610233	FALSE	4.51362	2.7452e-07	TRUE	-3.5538	1.3727e-08	TRUE	-0.416686	0.622733	FALSE	3.13712	1.80765e-06	TRUE
chr22_40241231_40241462	chr22	40241231	40241462	+	intron (NM_001162501, intron 1 of 22)	63421	23112	TNRC6B	3.9564	3.72231e-07	TRUE	2.24366	0.110554	FALSE	4.18001	4.85469e-09	TRUE	-1.71275	0.002047	TRUE	0.223603	0.822634	FALSE	1.93635	6.07739e-05	TRUE
chr18_54203981_54204220	chr18	54203981	54204220	+	intron (NM_015832, intron 2 of 2)	18312	677819	SNORA37	3.63726	0.00119187	TRUE	3.54626	0.00771929	TRUE	4.51275	2.75459e-07	TRUE	-0.0909979	0.954022	FALSE	0.875495	0.332479	FALSE	0.966493	0.0694561	FALSE
chr11_77456879_77457159	chr11	77456879	77457159	+	intron (NM_001128620, intron 1 of 15)	17044	5058	PAK1	3.35641	0.00563673	TRUE	3.388	0.017086	TRUE	4.51274	5.40999e-07	TRUE	0.0315895	0.98613	FALSE	1.15633	0.214408	FALSE	1.12474	0.0457775	TRUE
chr18_69945307_69945499	chr18	69945307	69945499	+	intron (NM_001303619, intron 1 of 4)	2450	10666	CD226	3.55196	0.0018887	TRUE	3.11306	0.0396635	TRUE	4.51267	2.53297e-07	TRUE	-0.438899	0.73014	FALSE	0.96071	0.277393	FALSE	1.39961	0.00914392	TRUE
chr3_130178839_130179156	chr3	130178839	130179156	+	Intergenic	-33823	646300	COL6A4P2	4.29831	7.22375e-06	TRUE	3.30237	0.0207891	TRUE	4.51112	2.23465e-07	TRUE	-0.995941	0.151991	FALSE	0.212812	0.852694	FALSE	1.20875	0.0217879	TRUE
chr4_123625079_123625300	chr4	123625079	123625300	+	Intergenic	-24802	285419	LINC01091	3.55216	0.00183658	TRUE	1.37673	0.60972	FALSE	4.51112	2.23465e-07	TRUE	-2.17543	0.0208174	TRUE	0.958958	0.272859	FALSE	3.13439	1.43128e-06	TRUE
chr9_132007151_132007327	chr9	132007151	132007327	+	intron (NM_004269, intron 3 of 7)	72648	9442	MED27	3.36257	0.00479013	TRUE	1.6792	0.485485	FALSE	4.51112	2.23465e-07	TRUE	-1.68337	0.100119	FALSE	1.14855	0.187762	FALSE	2.83192	5.56374e-06	TRUE
chr6_53427062_53427267	chr6	53427062	53427267	+	Intergenic	-77985	60481	ELOVL5	3.79666	0.000420954	TRUE	1.37671	0.60972	FALSE	4.5111	2.23465e-07	TRUE	-2.41995	0.00470217	TRUE	0.714445	0.431456	FALSE	3.13439	1.43128e-06	TRUE
chr19_2597983_2598183	chr19	2597983	2598183	+	intron (NM_052847, intron 2 of 4)	-32632	102465838	MIR7850	3.93935	0.00015347	TRUE	2.49195	0.1739	FALSE	4.51109	2.23465e-07	TRUE	-1.4474	0.063951	FALSE	0.571739	0.539411	FALSE	2.01914	0.000333778	TRUE
chr2_156476915_156477105	chr2	156476915	156477105	+	intron (NM_001083112, intron 2 of 16)	40622	2820	GPD2	4.78763	2.53315e-08	TRUE	1.92909	0.381814	FALSE	4.51107	2.23465e-07	TRUE	-2.85855	1.48131e-06	TRUE	-0.276566	0.774574	FALSE	2.58198	1.85233e-05	TRUE
chr21_35343523_35343725	chr21	35343523	35343725	+	Intergenic	237140	100506403	LOC100506403	4.18825	2.02992e-05	TRUE	2.63951	0.132533	FALSE	4.51098	2.26733e-07	TRUE	-1.54874	0.0252507	TRUE	0.322722	0.75986	FALSE	1.87147	0.000742629	TRUE
chr2_191650970_191651683	chr2	191650970	191651683	+	Intergenic	-26746	64859	NABP1	3.95051	3.21041e-14	TRUE	1.99159	0.0296914	TRUE	4.41081	6.39249e-21	TRUE	-1.95892	9.14573e-08	TRUE	0.460308	0.379984	FALSE	2.41923	1.1964e-13	TRUE
chr8_89727124_89727239	chr8	89727124	89727239	+	intron (NR_125822, intron 1 of 4)	30530	101929709	LOC101929709	3.58139	1.49746e-05	TRUE	0.507227	0.859675	FALSE	4.50575	6.93793e-12	TRUE	-3.07416	1.52721e-05	TRUE	0.924368	0.150009	FALSE	3.99853	4.63876e-13	TRUE
chr10_103504315_103504584	chr10	103504315	103504584	+	intron (NR_120675, intron 2 of 3)	10471	9148	NEURL1	3.93935	0.00015347	TRUE	3.11334	0.0391715	TRUE	4.94429	5.35333e-10	TRUE	-0.826011	0.346205	FALSE	1.00495	0.166664	FALSE	1.83096	7.91247e-05	TRUE
chr7_75201886_75202113	chr7	75201886	75202113	+	intron (NR_002206, intron 9 of 23).2	-30001	654817	NCF1C	3.9393	0.000154144	TRUE	1.6792	0.485498	FALSE	5.03489	1.17202e-10	TRUE	-2.2601	0.00442982	TRUE	1.09559	0.111537	FALSE	3.35569	1.28705e-09	TRUE
chr7_99631591_99631926	chr7	99631591	99631926	+	3' UTR (NM_145115, exon 8 of 8)	14810	221785	ZSCAN25	3.9372	0.000178567	TRUE	1.92876	0.383242	FALSE	4.81002	7.22411e-09	TRUE	-2.00844	0.0114903	TRUE	0.872818	0.275677	FALSE	2.88126	4.84813e-07	TRUE
chr4_83235816_83236004	chr4	83235816	83236004	+	Intergenic	48885	27235	COQ2	3.91841	4.30455e-07	TRUE	1.90303	0.225969	FALSE	4.48737	1.707e-11	TRUE	-2.01538	0.000327544	TRUE	0.568959	0.421977	FALSE	2.58434	2.03078e-08	TRUE
chr3_111700193_111700442	chr3	111700193	111700442	+	intron (NM_153268, intron 1 of 3)	-22884	100874115	PLCXD2-AS1	3.92112	4.09094e-07	TRUE	1.46005	0.429697	FALSE	4.20396	2.10996e-09	TRUE	-2.46106	2.53491e-05	TRUE	0.282842	0.758059	FALSE	2.74391	1.20144e-07	TRUE
chr1_174970044_174970329	chr1	174970044	174970329	+	intron (NM_001243765, intron 4 of 8)	5418	9910	RABGAP1L	4.25386	2.41283e-09	TRUE	0.810991	0.7414	FALSE	4.48139	7.88783e-12	TRUE	-3.44287	2.3119e-09	TRUE	0.227532	0.783692	FALSE	3.6704	3.26638e-12	TRUE
chr7_45204114_45204472	chr7	45204114	45204472	+	Intergenic	46525	10268	RAMP3	4.28319	1.4911e-09	TRUE	1.45881	0.428116	FALSE	4.4809	7.81186e-12	TRUE	-2.82437	6.50254e-08	TRUE	0.197712	0.816202	FALSE	3.02209	2.7548e-10	TRUE
chr8_128299036_128299283	chr8	128299036	128299283	+	Intergenic	149043	100302281	MIR1208	3.13695	0.000535691	TRUE	1.90461	0.220413	FALSE	4.48065	3.85687e-12	TRUE	-1.23234	0.111247	FALSE	1.3437	0.0228629	TRUE	2.57604	4.68879e-09	TRUE
chr1_117083490_117083898	chr1	117083490	117083898	+	intron (NM_003594, intron 10 of 22)	-10949	100126331	MIR942	3.92079	3.40214e-07	TRUE	-0.398738	0.907578	FALSE	4.19685	1.67192e-09	TRUE	-4.31953	5.20171e-09	TRUE	0.276056	0.759345	FALSE	4.59559	6.77994e-12	TRUE
chr3_4387693_4387996	chr3	4387693	4387996	+	intron (NM_182760, intron 7 of 8)	79438	285362	SUMF1	4.0219	1.66929e-07	TRUE	0.124429	0.970963	FALSE	4.47597	4.1084e-11	TRUE	-3.89747	1.45206e-08	TRUE	0.454074	0.55256	FALSE	4.35154	6.72304e-13	TRUE
chr3_180959738_180960045	chr3	180959738	180960045	+	intron (NM_001013439, intron 11 of 17)	29627	131118	DNAJC19	3.25815	0.00783635	TRUE	0.99354	0.753155	FALSE	4.4701	4.25151e-07	TRUE	-2.26461	0.0376745	TRUE	1.21195	0.178576	FALSE	3.47656	6.46498e-07	TRUE
chr2_65397235_65397542	chr2	65397235	65397542	+	intron (NM_181784, intron 1 of 5)	-30591	200734	SPRED2	3.91913	2.897e-07	TRUE	2.4335	0.0615956	FALSE	4.28056	2.98973e-10	TRUE	-1.48563	0.00540198	TRUE	0.361431	0.650577	FALSE	1.84706	2.46808e-05	TRUE
chr1_156065291_156065518	chr1	156065291	156065518	+	intron (NR_133653, intron 1 of 3)	4255	57111	RAB25	3.91761	3.06658e-07	TRUE	1.05958	0.624889	FALSE	3.90789	9.38397e-08	TRUE	-2.85803	2.13073e-06	TRUE	-0.00972003	0.992947	FALSE	2.84831	6.71879e-07	TRUE
chr11_34791846_34792035	chr11	34791846	34792035	+	Intergenic	-124190	8050	PDHX	4.2443	1.21252e-05	TRUE	1.67919	0.485485	FALSE	4.4684	3.72113e-07	TRUE	-2.56511	0.000330654	TRUE	0.224097	0.845438	FALSE	2.7892	9.63009e-06	TRUE
chr6_45709871_45710133	chr6	45709871	45710133	+	Intergenic	227595	53405	CLIC5	3.91369	6.88889e-11	TRUE	2.02129	0.054566	FALSE	4.23362	2.12712e-14	TRUE	-1.8924	1.39699e-05	TRUE	0.319934	0.666449	FALSE	2.21233	1.68003e-08	TRUE
chr20_35093595_35093752	chr20	35093595	35093752	+	promoter-TSS (NM_199368)	-858	26133	TRPC4AP	2.38674	0.115855	FALSE	2.14206	0.297481	FALSE	4.46836	3.72113e-07	TRUE	-0.244684	0.913678	FALSE	2.08162	0.0212202	TRUE	2.32631	8.75405e-05	TRUE
chr4_184364234_184364506	chr4	184364234	184364506	+	Intergenic	-10393	728175	LINC02363	4.12998	3.37454e-05	TRUE	3.21092	0.0285159	TRUE	4.46835	3.72113e-07	TRUE	-0.919056	0.233634	FALSE	0.338368	0.751328	FALSE	1.25742	0.0192744	TRUE
chr7_106915700_106916250	chr7	106915700	106916250	+	Intergenic	50496	5294	PIK3CG	4.10146	3.90555e-12	TRUE	1.58702	0.196523	FALSE	4.46831	3.10641e-16	TRUE	-2.51443	1.49849e-08	TRUE	0.366856	0.600578	FALSE	2.88129	1.87907e-12	TRUE
chr6_111289583_111289824	chr6	111289583	111289824	+	Intergenic	30424	91749	MFSD4B	4.18824	2.01333e-05	TRUE	2.63946	0.132531	FALSE	4.46831	3.72113e-07	TRUE	-1.54878	0.0251269	TRUE	0.280073	0.798751	FALSE	1.82885	0.00112045	TRUE
chr10_91973937_91974197	chr10	91973937	91974197	+	intron (NM_003972, intron 14 of 37)	50088	9044	BTAF1	3.89847	8.30579e-11	TRUE	0.979654	0.5326	FALSE	4.15028	1.05445e-13	TRUE	-2.91882	1.81898e-09	TRUE	0.251811	0.7546	FALSE	3.17063	1.62654e-12	TRUE
chr2_45904287_45904598	chr2	45904287	45904598	+	intron (NM_005400, intron 2 of 14)	252538	5581	PRKCE	3.86979	0.000255749	TRUE	2.89576	0.0733834	FALSE	4.46828	3.72113e-07	TRUE	-0.974035	0.261684	FALSE	0.598484	0.523316	FALSE	1.57252	0.00412742	TRUE
chr2_135053327_135053460	chr2	135053327	135053460	+	intron (NM_012233, intron 2 of 23)	1128	22930	RAB3GAP1	3.88055	3.97945e-07	TRUE	2.60048	0.0340779	TRUE	3.20184	0.000135471	TRUE	-1.28007	0.0177315	TRUE	-0.678708	0.411123	FALSE	0.60136	0.342751	FALSE
chr4_14782924_14783411	chr4	14782924	14783411	+	intron (NR_126435, intron 2 of 6)	105002	201853	LINC00504	2.99995	0.000146343	TRUE	0.272909	0.917886	FALSE	4.4623	1.06913e-14	TRUE	-2.72704	0.00012968	TRUE	1.46235	0.0107047	TRUE	4.18939	1.26457e-16	TRUE
chr9_1876130_1876375	chr9	1876130	1876375	+	Intergenic	-138967	6595	SMARCA2	3.41304	2.32044e-06	TRUE	0.523052	0.822158	FALSE	4.45945	1.05357e-14	TRUE	-2.88999	3.19278e-06	TRUE	1.0464	0.0637606	FALSE	3.93639	7.44547e-16	TRUE
chr6_88662772_88663172	chr6	88662772	88663172	+	intron (NM_001286426, intron 13 of 14)	-123603	101928936	LOC101928936	4.22789	1.17742e-08	TRUE	2.34191	0.0862258	FALSE	4.44649	8.98461e-11	TRUE	-1.88598	0.000207545	TRUE	0.2186	0.815464	FALSE	2.10458	3.66307e-06	TRUE
chr6_137678479_137678762	chr6	137678479	137678762	+	Intergenic	12974	102723649	LOC102723649	3.87899	7.96705e-07	TRUE	0.810934	0.742528	FALSE	4.44374	5.38296e-11	TRUE	-3.06805	1.92204e-06	TRUE	0.564756	0.44096	FALSE	3.63281	3.61018e-11	TRUE
chr12_71546477_71546818	chr12	71546477	71546818	+	intron (NM_001277227, intron 4 of 16)	106877	8549	LGR5	3.88024	8.16545e-07	TRUE	2.14178	0.140402	FALSE	4.23652	1.87752e-09	TRUE	-1.73846	0.00224628	TRUE	0.356285	0.686329	FALSE	2.09474	1.27253e-05	TRUE
chr1_85321673_85321953	chr1	85321673	85321953	+	intron (NM_012137, intron 5 of 5)	-44909	8915	BCL10	3.87584	1.12315e-06	TRUE	2.51981	0.0506982	FALSE	4.26842	1.93965e-09	TRUE	-1.35604	0.0203985	TRUE	0.392577	0.6555	FALSE	1.74861	0.000197993	TRUE
chr4_16259994_16260121	chr4	16259994	16260121	+	Intergenic	33394	202020	TAPT1-AS1	3.79672	0.000420954	TRUE	2.63948	0.132531	FALSE	4.42441	6.1593e-07	TRUE	-1.15724	0.181727	FALSE	0.62769	0.508413	FALSE	1.78493	0.0017029	TRUE
chr13_48210232_48210525	chr13	48210232	48210525	+	Intergenic	-22760	9445	ITM2B	3.87027	0.00026756	TRUE	2.14195	0.298274	FALSE	5.20141	7.77609e-12	TRUE	-1.72832	0.0323825	TRUE	1.33114	0.0398104	TRUE	3.05946	1.15862e-09	TRUE
chr15_92288858_92289065	chr15	92288858	92289065	+	Intergenic	-104926	8128	ST8SIA2	3.63834	0.00113005	TRUE	0.993526	0.753155	FALSE	4.42432	6.1593e-07	TRUE	-2.64482	0.00471773	TRUE	0.785976	0.399319	FALSE	3.43079	9.76947e-07	TRUE
chr12_89375849_89376107	chr12	89375849	89376107	+	Intergenic	-23119	1848	DUSP6	3.14423	0.012254	TRUE	2.63945	0.132531	FALSE	4.42428	6.1593e-07	TRUE	-0.504788	0.731289	FALSE	1.28005	0.158744	FALSE	1.78484	0.0017035	TRUE
chr12_9719988_9720102	chr12	9719988	9720102	+	intron (NM_001253750, intron 2 of 3)	13254	160365	CLECL1	3.14422	0.012254	TRUE	2.14206	0.297481	FALSE	4.42427	6.1593e-07	TRUE	-1.00217	0.42201	FALSE	1.28004	0.158744	FALSE	2.28221	0.000143507	TRUE
chr5_52748690_52748885	chr5	52748690	52748885	+	Intergenic	-39153	53918	PELO	3.86979	0.000255749	TRUE	1.37671	0.60972	FALSE	4.77922	6.65785e-09	TRUE	-2.49309	0.00282281	TRUE	0.909428	0.243845	FALSE	3.40251	2.56978e-08	TRUE
chr5_169656125_169656397	chr5	169656125	169656397	+	intron (NM_004946, intron 2 of 51)	19014	1794	DOCK2	3.74976	2.42755e-08	TRUE	1.49052	0.308219	FALSE	4.42155	1.22322e-14	TRUE	-2.25923	8.2876e-06	TRUE	0.671798	0.255746	FALSE	2.93103	3.7157e-12	TRUE
chr12_26808767_26809106	chr12	26808767	26809106	+	intron (NM_002223, intron 1 of 56)	24262	3709	ITPR2	4.03652	2.1768e-10	TRUE	0.921371	0.622382	FALSE	4.41354	1.52929e-14	TRUE	-3.11515	1.1035e-09	TRUE	0.377019	0.572464	FALSE	3.49216	2.42406e-14	TRUE
chr16_66563933_66564330	chr16	66563933	66564330	+	intron (NM_001204098, intron 2 of 3)	-2260	113540	CMTM1	4.0642	5.83204e-08	TRUE	0.125117	0.970887	FALSE	4.41178	4.99767e-11	TRUE	-3.93908	3.86833e-09	TRUE	0.34758	0.6616	FALSE	4.28666	7.65315e-13	TRUE
chr1_91754395_91754805	chr1	91754395	91754805	+	intron (NM_001195684, intron 5 of 17)	131679	7049	TGFBR3	3.98954	4.60706e-12	TRUE	2.30182	0.0149529	TRUE	4.41113	3.57485e-17	TRUE	-1.68772	2.61476e-05	TRUE	0.421596	0.488213	FALSE	2.10931	2.11834e-09	TRUE
chr1_84959256_84959737	chr1	84959256	84959737	+	intron (NM_153259, intron 2 of 13)	37626	255231	MCOLN2	3.85653	2.25974e-10	TRUE	3.27566	6.30105e-06	TRUE	4.64385	1.30646e-18	TRUE	-0.580868	0.293579	FALSE	0.787323	0.158584	FALSE	1.36819	4.69994e-05	TRUE
chr1_206786242_206786458	chr1	206786242	206786458	+	Intergenic	-12520	29949	IL19	4.32433	4.41829e-12	TRUE	2.68686	0.00677446	TRUE	4.40994	1.5065e-13	TRUE	-1.63747	8.75113e-05	TRUE	0.0856026	0.927401	FALSE	1.72307	9.41742e-06	TRUE
chr17_27608421_27608723	chr17	27608421	27608723	+	intron (NM_014238, intron 16 of 20)	-22576	3965	LGALS9	3.31956	0.000128552	TRUE	1.27332	0.519014	FALSE	4.40835	1.56946e-11	TRUE	-2.04624	0.0034747	TRUE	1.08878	0.0768355	FALSE	3.13502	1.43372e-10	TRUE
chr4_112199588_112199897	chr4	112199588	112199897	+	Intergenic	-31997	55435	AP1AR	3.19826	0.000383776	TRUE	2.13905	0.137618	FALSE	4.40804	3.75598e-11	TRUE	-1.05921	0.178189	FALSE	1.20978	0.0617971	FALSE	2.26899	3.19581e-07	TRUE
chr19_38655568_38655845	chr19	38655568	38655845	+	intron (NM_001322033, intron 1 of 20)	8090	81	ACTN4	3.2716	0.000703067	TRUE	3.1851	0.00521418	TRUE	4.40782	1.20466e-08	TRUE	-0.0865008	0.956448	FALSE	1.13622	0.197662	FALSE	1.22272	0.0235331	TRUE
chr2_167862716_167863159	chr2	167862716	167863159	+	intron (NR_131227, intron 3 of 4)	44265	8708	B3GALT1	4.01631	1.22517e-12	TRUE	1.88835	0.0799596	FALSE	4.40686	9.34126e-18	TRUE	-2.12796	1.16568e-07	TRUE	0.39055	0.506843	FALSE	2.51852	2.56234e-12	TRUE
chr2_216056817_216057077	chr2	216056817	216057077	+	intron (NM_018441, intron 4 of 7)	24869	55825	PECR	3.84125	7.10188e-07	TRUE	1.06005	0.624514	FALSE	4.47933	5.95318e-12	TRUE	-2.78121	5.43953e-06	TRUE	0.638073	0.327686	FALSE	3.41928	1.16607e-11	TRUE
chr10_13180831_13181153	chr10	13180831	13181153	+	intron (NM_182751, intron 7 of 19)	19438	55388	MCM10	3.37935	2.68527e-06	TRUE	1.08626	0.529589	FALSE	4.40104	1.30631e-14	TRUE	-2.29308	7.46399e-05	TRUE	1.02169	0.0654557	FALSE	3.31478	7.9187e-14	TRUE
chr7_47361806_47362168	chr7	47361806	47362168	+	intron (NM_022748, intron 17 of 30)	102816	109623468	SNORD151	3.84004	7.96705e-07	TRUE	1.90371	0.222831	FALSE	4.16636	2.18161e-09	TRUE	-1.93634	0.000589207	TRUE	0.326317	0.70628	FALSE	2.26266	2.68027e-06	TRUE
chr16_9966799_9967107	chr16	9966799	9967107	+	intron (NM_000833, intron 3 of 13)	215114	2903	GRIN2A	2.49537	0.0206374	TRUE	0.506225	0.860488	FALSE	4.39714	1.9676e-10	TRUE	-1.98914	0.0582325	FALSE	1.90177	0.00863614	TRUE	3.89091	3.03965e-11	TRUE
chr14_53148635_53148901	chr14	53148635	53148901	+	intron (NM_001160147, intron 1 of 12)	4560	80821	DDHD1	3.82214	1.26922e-08	TRUE	2.20756	0.0530043	FALSE	4.27462	9.69478e-13	TRUE	-1.61458	0.00080066	TRUE	0.452487	0.514973	FALSE	2.06706	3.5426e-07	TRUE
chr12_11832195_11832350	chr12	11832195	11832350	+	intron (NM_001987, intron 2 of 7)	182418	2120	ETV6	3.91774	8.41347e-07	TRUE	0.127056	0.970887	FALSE	4.38397	4.7133e-10	TRUE	-3.79069	1.16563e-07	TRUE	0.466226	0.574257	FALSE	4.25691	1.56206e-11	TRUE
chr11_86228721_86229203	chr11	86228721	86229203	+	Intergenic	-15422	8726	EED	3.62827	8.11787e-09	TRUE	2.39539	0.0102273	TRUE	4.38395	7.45658e-16	TRUE	-1.23288	0.00990799	TRUE	0.755683	0.202487	FALSE	1.98856	7.16013e-08	TRUE
chr19_4837530_4837836	chr19	4837530	4837836	+	TTS (NM_001164189)	-5941	148022	TICAM1	3.83697	4.4814e-10	TRUE	-0.802944	0.731335	FALSE	4.38344	2.21418e-15	TRUE	-4.63991	1.63147e-13	TRUE	0.546473	0.405585	FALSE	5.18638	4.2441e-20	TRUE
chr10_59881097_59881549	chr10	59881097	59881549	+	intron (NM_005436, intron 1 of 8)	25333	8030	CCDC6	3.81006	1.26645e-12	TRUE	1.36473	0.23965	FALSE	4.09653	1.54804e-16	TRUE	-2.44534	2.40376e-09	TRUE	0.286466	0.6651	FALSE	2.7318	3.61505e-13	TRUE
chr15_67307264_67307512	chr15	67307264	67307512	+	TTS (NM_022784)	-52190	79719	AAGAB	3.84356	1.78437e-06	TRUE	0.507804	0.8603	FALSE	4.38057	4.15779e-10	TRUE	-3.33576	1.32575e-06	TRUE	0.537012	0.499158	FALSE	3.87277	7.8027e-11	TRUE
chr4_46932108_46932389	chr4	46932108	46932389	+	intron (NM_001204267, intron 7 of 7)	-23013	170712	COX7B2	4.12808	4.10173e-05	TRUE	3.61949	0.0056408	TRUE	4.37907	1.36748e-06	TRUE	-0.508587	0.593832	FALSE	0.250995	0.833132	FALSE	0.759582	0.181652	FALSE
chr2_38715099_38715327	chr2	38715099	38715327	+	intron (NM_138801, intron 4 of 6)	36281	6432	SRSF7	4.35032	4.33742e-06	TRUE	0.993536	0.753155	FALSE	4.37894	1.01527e-06	TRUE	-3.35679	8.49667e-06	TRUE	0.0286173	0.983656	FALSE	3.38541	1.75626e-06	TRUE
chr9_89277566_89277713	chr9	89277566	89277713	+	Intergenic	-33556	1164	CKS2	3.55215	0.00183658	TRUE	0.993536	0.753155	FALSE	4.37894	1.01527e-06	TRUE	-2.55861	0.00808465	TRUE	0.826796	0.38185	FALSE	3.38541	1.75626e-06	TRUE
chr8_127366597_127366794	chr8	127366597	127366794	+	intron (NR_117099, intron 3 of 3)	-33704	101805488	CCAT2	3.55214	0.00183658	TRUE	1.9291	0.381814	FALSE	4.37892	1.01527e-06	TRUE	-1.62304	0.0828976	FALSE	0.826788	0.38185	FALSE	2.44982	8.60359e-05	TRUE
chr18_76410775_76410938	chr18	76410775	76410938	+	intron (NM_014643, intron 3 of 6)	-80796	101927989	LOC101927989	3.25766	0.00771506	TRUE	0.993492	0.753155	FALSE	4.37892	1.04147e-06	TRUE	-2.26417	0.0371317	TRUE	1.12126	0.22463	FALSE	3.38543	1.81445e-06	TRUE
chr20_5369720_5369962	chr20	5369720	5369962	+	Intergenic	-53109	128674	PROKR2	4.29827	7.22375e-06	TRUE	1.6792	0.485485	FALSE	4.37889	1.01527e-06	TRUE	-2.61906	0.000193627	TRUE	0.0806208	0.951954	FALSE	2.69968	2.81061e-05	TRUE
chr13_99289798_99289942	chr13	99289798	99289942	+	intron (NR_026644, intron 4 of 8)	17625	1880	GPR183	4.18828	2.01333e-05	TRUE	1.67917	0.485485	FALSE	4.37887	1.01527e-06	TRUE	-2.50911	0.000562415	TRUE	0.190592	0.874542	FALSE	2.6997	2.81061e-05	TRUE
chr19_38551430_38551708	chr19	38551430	38551708	+	intron (NM_001042723, intron 88 of 104)	-44778	105372397	LOC105372397	3.80629	8.15296e-09	TRUE	0.920156	0.622355	FALSE	3.82211	1.48539e-09	TRUE	-2.88614	5.14195e-08	TRUE	0.0158163	0.988493	FALSE	2.90195	9.40362e-09	TRUE
chr4_26905235_26905604	chr4	26905235	26905604	+	intron (NM_020860, intron 1 of 11)	44728	57620	STIM2	3.80602	1.9742e-06	TRUE	1.90347	0.227682	FALSE	3.76374	9.95403e-07	TRUE	-1.90255	0.00128827	TRUE	-0.0422843	0.975711	FALSE	1.86026	0.00080557	TRUE
chr6_159976758_159977001	chr6	159976758	159977001	+	intron (NM_000876, intron 1 of 47)	7780	3482	IGF2R	4.01227	1.87656e-09	TRUE	2.73922	0.00548274	TRUE	4.36722	9.69478e-13	TRUE	-1.27305	0.00809408	TRUE	0.354948	0.653644	FALSE	1.628	5.47007e-05	TRUE
chr11_65362308_65362565	chr11	65362308	65362565	+	Intergenic	7625	220359	TIGD3	3.80189	1.17249e-06	TRUE	2.60072	0.0344851	TRUE	3.91031	8.38836e-08	TRUE	-1.20117	0.0352269	TRUE	0.108418	0.921857	FALSE	1.30959	0.00663997	TRUE
chr1_89274533_89274715	chr1	89274533	89274715	+	Intergenic	-1763	115362	GBP5	3.80106	9.74291e-07	TRUE	0.508002	0.859262	FALSE	4.07561	5.71372e-09	TRUE	-3.29306	5.95042e-07	TRUE	0.274552	0.760901	FALSE	3.56761	1.42241e-09	TRUE
chr1_182427120_182427326	chr1	182427120	182427326	+	Intergenic	19602	388719	LINC00272	3.79696	0.000427725	TRUE	0.470315	0.905488	FALSE	4.66995	3.2396e-08	TRUE	-3.32664	0.00041099	TRUE	0.872985	0.291999	FALSE	4.19963	4.72215e-09	TRUE
chr17_8598840_8599248	chr17	8598840	8599248	+	intron (NM_005964, intron 3 of 40)	31717	4628	MYH10	3.88902	2.20825e-06	TRUE	1.62538	0.358107	FALSE	4.34249	3.0012e-09	TRUE	-2.26364	0.000321026	TRUE	0.453472	0.621532	FALSE	2.71711	5.40897e-07	TRUE
chr8_60604543_60605015	chr8	60604543	60605015	+	intron (NM_002865, intron 6 of 7)	-73986	55636	CHD7	4.05423	6.02431e-13	TRUE	-0.805374	0.727438	FALSE	4.34159	7.30762e-17	TRUE	-4.85961	1.64212e-17	TRUE	0.287352	0.664039	FALSE	5.14696	2.71698e-22	TRUE
chr8_132995927_132996155	chr8	132995927	132996155	+	intron (NM_003235, intron 35 of 47)	50540	102466865	MIR7848	2.57336	0.0751211	FALSE	2.14204	0.297481	FALSE	4.33202	1.66141e-06	TRUE	-0.431321	0.82245	FALSE	1.75865	0.0642169	FALSE	2.18997	0.000378912	TRUE
chr1_12347787_12347934	chr1	12347787	12347934	+	intron (NM_015378, intron 44 of 69)	117821	55187	VPS13D	3.7967	0.000420954	TRUE	-0.35908	0.936341	FALSE	4.23334	4.51636e-06	TRUE	-4.15578	6.75875e-05	TRUE	0.436639	0.696433	FALSE	4.59242	2.23893e-07	TRUE
chr2_28271644_28271857	chr2	28271644	28271857	+	intron (NM_001329113, intron 11 of 13)	38709	100505716	LOC100505716	4.29828	7.22375e-06	TRUE	0.993548	0.753155	FALSE	4.332	1.66141e-06	TRUE	-3.30473	1.54238e-05	TRUE	0.0337166	0.981026	FALSE	3.33845	3.17489e-06	TRUE
chr5_78076376_78076691	chr5	78076376	78076691	+	intron (NM_001271769, intron 22 of 26)	118286	101929154	LOC101929154	3.25754	0.00769044	TRUE	0.993548	0.753155	FALSE	4.332	1.66141e-06	TRUE	-2.26399	0.0369986	TRUE	1.07446	0.252955	FALSE	3.33845	3.17489e-06	TRUE
chr12_53372725_53372867	chr12	53372725	53372867	+	Intergenic	-7399	6667	SP1	3.63835	0.00113005	TRUE	1.92911	0.381814	FALSE	4.332	1.66141e-06	TRUE	-1.70924	0.0563171	FALSE	0.69365	0.479377	FALSE	2.40289	0.000143344	TRUE
chr8_42189013_42189208	chr8	42189013	42189208	+	intron (NM_000930, intron 3 of 13)	18614	5327	PLAT	3.63837	0.00113005	TRUE	1.92911	0.381814	FALSE	4.33196	1.66148e-06	TRUE	-1.70927	0.0563171	FALSE	0.693587	0.479377	FALSE	2.40286	0.000143344	TRUE
chr6_6684377_6684860	chr6	6684377	6684860	+	Intergenic	-61792	285780	LY86-AS1	3.79517	3.21388e-10	TRUE	1.09545	0.46044	FALSE	4.39958	1.51615e-16	TRUE	-2.69972	1.753e-08	TRUE	0.604413	0.30608	FALSE	3.30413	3.6513e-15	TRUE
chr13_77230675_77230937	chr13	77230675	77230937	+	intron (NM_015057, intron 18 of 82)	96236	23077	MYCBP2	3.78656	4.27487e-06	TRUE	1.05833	0.631453	FALSE	3.60872	8.95483e-06	TRUE	-2.72823	3.95001e-05	TRUE	-0.17784	0.888487	FALSE	2.55039	0.000100449	TRUE
chr12_26872036_26872229	chr12	26872036	26872229	+	Intergenic	-38934	3709	ITPR2	4.16419	1.30256e-08	TRUE	0.811274	0.741591	FALSE	4.30756	2.978e-10	TRUE	-3.35292	1.59151e-08	TRUE	0.14337	0.883868	FALSE	3.49629	2.34438e-10	TRUE
chr1_206358050_206358313	chr1	206358050	206358313	+	intron (NM_001300952, intron 3 of 19)	-112062	9641	IKBKE	3.79956	1.83483e-08	TRUE	2.88162	0.00180069	TRUE	4.30656	4.93769e-13	TRUE	-0.917934	0.0777699	FALSE	0.506998	0.454221	FALSE	1.42493	0.000184576	TRUE
chr2_102258647_102259107	chr2	102258647	102259107	+	Intergenic	-52625	9173	IL1RL1	3.77364	4.33705e-08	TRUE	1.70745	0.212165	FALSE	4.43484	9.10425e-14	TRUE	-2.06619	6.15029e-05	TRUE	0.661206	0.308406	FALSE	2.7274	2.64685e-10	TRUE
chr6_87341990_87342258	chr6	87341990	87342258	+	3' UTR (NM_001287445, exon 3 of 3)	-2729	206412	C6orf163	3.76578	6.34758e-10	TRUE	0.526662	0.793568	FALSE	3.83043	4.43295e-11	TRUE	-3.23912	5.30604e-10	TRUE	0.0646525	0.951343	FALSE	3.30377	2.60801e-11	TRUE
chr5_125219783_125220054	chr5	125219783	125220054	+	intron (NR_109882, intron 4 of 5)	183087	101927421	LOC101927421	4.09603	1.02493e-07	TRUE	1.05804	0.630357	FALSE	4.3016	1.69623e-09	TRUE	-3.03799	6.60443e-07	TRUE	0.205575	0.840017	FALSE	3.24356	8.0934e-09	TRUE
chr8_133043704_133043926	chr8	133043704	133043926	+	intron (NM_001282964, intron 5 of 6)	2766	102466865	MIR7848	3.79945	1.40984e-06	TRUE	1.45797	0.428925	FALSE	4.3011	2.77273e-10	TRUE	-2.34149	8.77443e-05	TRUE	0.501643	0.501188	FALSE	2.84313	1.31482e-08	TRUE
chr8_133693779_133694042	chr8	133693779	133694042	+	Intergenic	-9844	105375773	LOC105375773	3.76302	6.38898e-08	TRUE	1.48967	0.316658	FALSE	3.72563	2.93171e-08	TRUE	-2.27335	2.05881e-05	TRUE	-0.0373899	0.977278	FALSE	2.23596	1.18458e-05	TRUE
chr6_140809662_140810006	chr6	140809662	140810006	+	Intergenic	126020	100616180	MIR4465	3.75941	2.47946e-06	TRUE	2.02733	0.175194	FALSE	4.62079	8.34057e-13	TRUE	-1.73208	0.00309986	TRUE	0.861385	0.165865	FALSE	2.59346	2.94025e-09	TRUE
chr5_171355281_171355819	chr5	171355281	171355819	+	Intergenic	-10568	109616973	SNORA70J	4.39259	3.00722e-13	TRUE	1.08564	0.531549	FALSE	4.28814	4.40172e-13	TRUE	-3.30695	2.3785e-12	TRUE	-0.104456	0.903342	FALSE	3.20249	4.4012e-12	TRUE
chr14_50786851_50787022	chr14	50786851	50787022	+	intron (NM_182946, intron 5 of 29)	-34861	105370489	LOC105370489	3.75915	2.68527e-06	TRUE	0.810528	0.742397	FALSE	4.34894	1.8416e-10	TRUE	-2.94862	7.47528e-06	TRUE	0.589787	0.423668	FALSE	3.53841	1.36456e-10	TRUE
chr18_29383960_29384222	chr18	29383960	29384222	+	Intergenic	-914819	100302131	MIR302F	4.18825	2.01333e-05	TRUE	2.63946	0.132531	FALSE	4.28353	2.74143e-06	TRUE	-1.54879	0.0251269	TRUE	0.0952763	0.944091	FALSE	1.64407	0.00565471	TRUE
chr20_20732072_20732246	chr20	20732072	20732246	+	Intergenic	-19536	57186	RALGAPA2	3.71968	0.0006907	TRUE	1.92911	0.381814	FALSE	4.28353	2.74143e-06	TRUE	-1.79057	0.0376745	TRUE	0.563848	0.586707	FALSE	2.35442	0.000236047	TRUE
chr20_49679035_49679199	chr20	49679035	49679199	+	intron (NM_004776, intron 1 of 8)	34767	9334	B4GALT5	2.57338	0.0751211	FALSE	2.32756	0.230594	FALSE	4.28353	2.74143e-06	TRUE	-0.245819	0.907588	FALSE	1.71015	0.0766714	FALSE	1.95597	0.00140343	TRUE
chr6_11413208_11413409	chr6	11413208	11413409	+	Intergenic	-30960	4739	NEDD9	1.92039	0.265297	FALSE	4.41774	1.20654e-05	TRUE	4.28351	2.74143e-06	TRUE	2.49734	0.000232166	TRUE	2.36312	0.0184534	TRUE	-0.134221	0.83231	FALSE
chr15_35673386_35673671	chr15	35673386	35673671	+	intron (NR_038251, intron 1 of 2)	-127325	89978	DPH6	2.57335	0.0751211	FALSE	1.67918	0.485485	FALSE	4.28348	2.74143e-06	TRUE	-0.894168	0.59607	FALSE	1.71013	0.0766714	FALSE	2.6043	8.06283e-05	TRUE
chr19_57274333_57274479	chr19	57274333	57274479	+	intron (NR_136528, intron 3 of 3)	-5561	10794	ZNF460	2.57338	0.0751211	FALSE	1.37671	0.60972	FALSE	4.28348	2.74143e-06	TRUE	-1.19667	0.451385	FALSE	1.7101	0.0766714	FALSE	2.90677	2.3702e-05	TRUE
chr22_33565618_33565736	chr22	33565618	33565736	+	intron (NM_133642, intron 5 of 14)	-129008	100616295	MIR4764	3.36251	0.0047903	TRUE	2.89576	0.0733834	FALSE	4.28348	2.74143e-06	TRUE	-0.46675	0.730785	FALSE	0.920967	0.34657	FALSE	1.38772	0.0173705	TRUE
chr10_48907810_48908046	chr10	48907810	48908046	+	intron (NM_020945, intron 47 of 61)	6307	474354	LRRC18	3.75454	4.02391e-06	TRUE	-0.39637	0.908327	FALSE	3.8676	3.66135e-07	TRUE	-4.15091	1.3439e-07	TRUE	0.113062	0.924665	FALSE	4.26397	7.18312e-09	TRUE
chr3_58259030_58259251	chr3	58259030	58259251	+	intron (NM_001320126, intron 3 of 9)	21638	57406	ABHD6	3.75327	8.71318e-08	TRUE	0.272379	0.918714	FALSE	3.16719	2.00543e-05	TRUE	-3.48089	1.94633e-08	TRUE	-0.586075	0.491036	FALSE	2.89481	1.45322e-05	TRUE
chr3_18207296_18207578	chr3	18207296	18207578	+	intron (NM_001257177, intron 4 of 4)	217900	6304	SATB1	3.80067	1.09731e-06	TRUE	1.90445	0.221409	FALSE	4.27829	2.42108e-10	TRUE	-1.89622	0.000798565	TRUE	0.477621	0.514122	FALSE	2.37384	3.03162e-07	TRUE
chr8_78821075_78821356	chr8	78821075	78821356	+	Intergenic	-15692	3574	IL7	3.75324	6.36655e-06	TRUE	1.77377	0.287885	FALSE	4.1433	2.32173e-08	TRUE	-1.97946	0.0018682	TRUE	0.390064	0.688618	FALSE	2.36953	1.09499e-05	TRUE
chr15_98952388_98952662	chr15	98952388	98952662	+	intron (NM_000875, intron 20 of 20)	53131	145814	PGPEP1L	3.75309	3.25999e-06	TRUE	1.62203	0.349946	FALSE	3.80214	6.13493e-07	TRUE	-2.13106	0.000473656	TRUE	0.0490581	0.970561	FALSE	2.18012	0.000108525	TRUE
chr6_6515701_6516061	chr6	6515701	6516061	+	intron (NR_026970, intron 3 of 7)	-72820	9450	LY86	3.62356	1.31803e-05	TRUE	2.81658	0.0161209	TRUE	4.27024	1.1612e-09	TRUE	-0.806982	0.259843	FALSE	0.646673	0.402163	FALSE	1.45366	0.00120874	TRUE
chr6_34340460_34340831	chr6	34340460	34340831	+	intron (NM_006703, intron 2 of 4)	52035	11165	NUDT3	3.74582	7.73503e-09	TRUE	0.52205	0.821276	FALSE	3.06161	1.7429e-05	TRUE	-3.22377	3.70924e-09	TRUE	-0.684211	0.325538	FALSE	2.53956	3.424e-05	TRUE
chr2_74304859_74305200	chr2	74304859	74305200	+	intron (NM_021196, intron 1 of 25)	9996	57835	SLC4A5	3.49843	0.000144597	TRUE	0.507432	0.862784	FALSE	4.26827	5.15124e-08	TRUE	-2.991	0.000238187	TRUE	0.769846	0.420726	FALSE	3.76084	2.99658e-08	TRUE
chr3_122299257_122299538	chr3	122299257	122299538	+	Intergenic	-25767	1475	CSTA	3.52167	1.0274e-06	TRUE	2.73968	0.00514267	TRUE	4.259	3.80492e-12	TRUE	-0.781983	0.215617	FALSE	0.737333	0.272859	FALSE	1.51932	0.000165249	TRUE
chr16_11239739_11240001	chr16	11239739	11240001	+	Intergenic	16312	8651	SOCS1	3.07066	0.000840692	TRUE	2.43364	0.0601068	FALSE	4.25158	3.03158e-10	TRUE	-0.637023	0.502008	FALSE	1.18092	0.073815	FALSE	1.81794	2.60948e-05	TRUE
chr13_50074894_50075188	chr13	50074894	50075188	+	intron (NR_152566, intron 2 of 13)	7000	8847	DLEU2	3.20418	0.000464295	TRUE	2.24436	0.11069	FALSE	4.25129	1.90916e-09	TRUE	-0.959819	0.250947	FALSE	1.04711	0.159971	FALSE	2.00693	2.67831e-05	TRUE
chr5_64925216_64925471	chr5	64925216	64925471	+	intron (NM_001297644, intron 11 of 12)	156425	10283	CWC27	3.71675	2.92991e-06	TRUE	1.62308	0.344949	FALSE	4.25035	4.08277e-10	TRUE	-2.09366	0.000435667	TRUE	0.533608	0.466265	FALSE	2.62727	6.25925e-08	TRUE
chr14_81550374_81550604	chr14	81550374	81550604	+	Intergenic	-16628	6400	SEL1L	3.95652	2.43608e-07	TRUE	0.125709	0.970887	FALSE	4.24523	9.10094e-10	TRUE	-3.83081	2.21573e-08	TRUE	0.288709	0.74564	FALSE	4.11952	2.77462e-11	TRUE
chr4_78451394_78451801	chr4	78451394	78451801	+	intron (NM_025074, intron 45 of 73)	-99991	306	ANXA3	3.74272	2.72491e-08	TRUE	1.60311	0.253754	FALSE	3.82745	1.86538e-09	TRUE	-2.13961	2.05881e-05	TRUE	0.0847291	0.935002	FALSE	2.22434	1.90602e-06	TRUE
chr6_148780961_148781380	chr6	148780961	148781380	+	intron (NM_005715, intron 1 of 7)	34035	10090	UST	3.73671	1.14365e-12	TRUE	1.11821	0.342582	FALSE	4.05201	9.95408e-17	TRUE	-2.6185	5.29754e-10	TRUE	0.315305	0.643289	FALSE	2.9338	4.1621e-14	TRUE
chr9_95170952_95171278	chr9	95170952	95171278	+	exon (NM_001243744, exon 6 of 14)	-85021	100422842	MIR3074	3.7197	0.0006907	TRUE	0.993553	0.753155	FALSE	4.42437	6.1593e-07	TRUE	-2.72614	0.00276735	TRUE	0.704676	0.453867	FALSE	3.43082	9.76947e-07	TRUE
chr2_64679131_64679313	chr2	64679131	64679313	+	Intergenic	-25310	9792	SERTAD2	3.71969	0.0006907	TRUE	1.37671	0.60972	FALSE	4.46845	3.72113e-07	TRUE	-2.34299	0.00786955	TRUE	0.748759	0.415845	FALSE	3.09175	2.52915e-06	TRUE
chr5_53024090_53024242	chr5	53024090	53024242	+	intron (NR_073107, intron 1 of 28)	34840	3673	ITGA2	3.46047	0.00297292	TRUE	0.993531	0.753155	FALSE	4.23333	4.51636e-06	TRUE	-2.46694	0.0136363	TRUE	0.772857	0.446894	FALSE	3.23979	1.01456e-05	TRUE
chr1_166170106_166170325	chr1	166170106	166170325	+	Intergenic	-3460	149297	FAM78B	3.55175	0.00186022	TRUE	1.6791	0.485746	FALSE	4.23316	4.70392e-06	TRUE	-1.87265	0.0455399	TRUE	0.681408	0.507279	FALSE	2.55406	0.000142754	TRUE
chr19_45630574_45630816	chr19	45630574	45630816	+	intron (NR_147903, intron 9 of 19)	8392	442902	MIR330	3.71967	0.0006907	TRUE	2.49192	0.1739	FALSE	4.67036	3.02491e-08	TRUE	-1.22774	0.168165	FALSE	0.950691	0.243982	FALSE	2.17843	5.12034e-05	TRUE
chr4_85979326_85979616	chr4	85979326	85979616	+	intron (NM_001025616, intron 8 of 9)	49198	83478	ARHGAP24	3.13628	0.000565572	TRUE	0.810393	0.741373	FALSE	4.22479	6.94233e-10	TRUE	-2.32588	0.00287921	TRUE	1.08852	0.111331	FALSE	3.4144	5.94437e-10	TRUE
chr16_18787419_18787668	chr16	18787419	18787668	+	intron (NM_001030009, intron 3 of 4)	2791	6210	RPS15A	3.20046	0.000333971	TRUE	0.810456	0.741156	FALSE	4.2237	4.98626e-10	TRUE	-2.39001	0.00161185	TRUE	1.02324	0.12968	FALSE	3.41324	3.91591e-10	TRUE
chr3_141328264_141328530	chr3	141328264	141328530	+	intron (NM_001080412, intron 1 of 7)	4184	253461	ZBTB38	3.71674	2.63659e-06	TRUE	1.45884	0.426226	FALSE	4.22366	4.98626e-10	TRUE	-2.2579	0.000166311	TRUE	0.506927	0.490155	FALSE	2.76482	2.41315e-08	TRUE
chr1_19124393_19124773	chr1	19124393	19124773	+	exon (NM_020765, exon 65 of 106)	85669	23352	UBR4	3.60626	4.16069e-05	TRUE	1.62351	0.363559	FALSE	4.22016	2.82687e-08	TRUE	-1.98276	0.00483302	TRUE	0.613894	0.505678	FALSE	2.59665	5.08488e-06	TRUE
chr12_92921915_92922187	chr12	92921915	92922187	+	intron (NM_003566, intron 1 of 28)	7280	8411	EEA1	3.08101	0.000111458	TRUE	0.928117	0.624415	FALSE	4.21729	2.24112e-11	TRUE	-2.15289	0.00160486	TRUE	1.13628	0.0894701	FALSE	3.28918	1.19342e-10	TRUE
chr4_38464363_38464739	chr4	38464363	38464739	+	intron (NR_110951, intron 2 of 7)	-45216	106144599	LINC01259	3.75194	4.61515e-06	TRUE	0.507188	0.860472	FALSE	4.20998	5.00179e-09	TRUE	-3.24476	3.97346e-06	TRUE	0.458031	0.598773	FALSE	3.70279	1.44349e-09	TRUE
chr2_213022304_213022481	chr2	213022304	213022481	+	intron (NM_001079526, intron 6 of 8)	-96056	100616472	MIR4776-2	2.84861	0.00384832	TRUE	1.76912	0.283128	FALSE	4.2054	2.57144e-09	TRUE	-1.07949	0.254014	FALSE	1.35679	0.0617971	FALSE	2.43628	1.19679e-06	TRUE
chr4_148735896_148736162	chr4	148735896	148736162	+	Intergenic	206349	105377480	LOC105377480	3.71863	0.000747979	TRUE	2.49259	0.175042	FALSE	4.332	2.06348e-06	TRUE	-1.22604	0.175369	FALSE	0.613373	0.548368	FALSE	1.83941	0.00229525	TRUE
chr8_128147401_128147580	chr8	128147401	128147580	+	Intergenic	-2626	100302281	MIR1208	3.71822	0.000766156	TRUE	2.63873	0.13469	FALSE	4.59721	1.17442e-07	TRUE	-1.07949	0.246625	FALSE	0.878993	0.318988	FALSE	1.95848	0.000401638	TRUE
chr16_25051881_25052180	chr16	25051881	25052180	+	Intergenic	-14857	283887	LINC02175	3.71802	4.51931e-08	TRUE	2.28476	0.0391715	TRUE	3.88323	8.98569e-10	TRUE	-1.43326	0.00370655	TRUE	0.165214	0.863302	FALSE	1.59848	0.000233029	TRUE
chr6_150001362_150001648	chr6	150001362	150001648	+	non-coding (NR_024045, exon 2 of 4)	3639	646024	RAET1K	3.715	2.66047e-08	TRUE	2.02334	0.0660765	FALSE	4.18648	6.8811e-12	TRUE	-1.69166	0.00117075	TRUE	0.471479	0.572066	FALSE	2.16314	1.6704e-06	TRUE
chr5_169671165_169671422	chr5	169671165	169671422	+	intron (NM_004946, intron 5 of 51)	34046	1794	DOCK2	3.26011	0.000225551	TRUE	-0.398933	0.907578	FALSE	4.19374	1.20252e-09	TRUE	-3.65904	2.19399e-05	TRUE	0.933627	0.186109	FALSE	4.59267	4.17049e-12	TRUE
chr10_91975026_91975262	chr10	91975026	91975262	+	intron (NM_003972, intron 14 of 37)	51165	9044	BTAF1	3.5307	2.88616e-05	TRUE	2.34374	0.0838152	FALSE	4.19363	2.92306e-09	TRUE	-1.18696	0.0777399	FALSE	0.662932	0.393553	FALSE	1.84989	8.34443e-05	TRUE
chr17_55734572_55734796	chr17	55734572	55734796	+	Intergenic	-2563	55273	TMEM100	3.48547	6.94109e-05	TRUE	1.77286	0.287541	FALSE	4.19342	1.20446e-08	TRUE	-1.71261	0.0144511	TRUE	0.707951	0.403179	FALSE	2.42057	5.64646e-06	TRUE
chr8_100155977_100156281	chr8	100155977	100156281	+	Intergenic	-1906	6674	SPAG1	4.31142	1.07069e-09	TRUE	1.06052	0.624889	FALSE	4.19317	1.64564e-09	TRUE	-3.2509	3.70924e-09	TRUE	-0.118244	0.900579	FALSE	3.13266	7.18312e-09	TRUE
chr7_94595736_94595983	chr7	94595736	94595983	+	intron (NM_001346713, intron 10 of 11)	60350	8910	SGCE	3.53828	3.96507e-05	TRUE	-1.22618	0.701527	FALSE	4.1927	8.85053e-09	TRUE	-4.76446	3.31381e-07	TRUE	0.654427	0.435573	FALSE	5.41888	6.25166e-12	TRUE
chr5_65048377_65048703	chr5	65048377	65048703	+	Intergenic	279622	10283	CWC27	3.71395	1.37208e-09	TRUE	2.44778	0.00736451	TRUE	3.92651	7.35657e-12	TRUE	-1.26617	0.00516454	TRUE	0.212556	0.806918	FALSE	1.47873	0.000177622	TRUE
chr12_101782232_101782597	chr12	101782232	101782597	+	intron (NM_024312, intron 5 of 20)	-42942	50511	SYCP3	3.61998	4.98499e-09	TRUE	0.973453	0.533743	FALSE	4.19027	1.64787e-14	TRUE	-2.64653	1.15623e-07	TRUE	0.57029	0.364289	FALSE	3.21682	1.68706e-13	TRUE
chr4_81827873_81828249	chr4	81827873	81828249	+	Intergenic	-356133	153020	RASGEF1B	3.68976	6.43831e-08	TRUE	0.920079	0.623535	FALSE	4.40178	2.55793e-14	TRUE	-2.76968	5.15857e-07	TRUE	0.712024	0.233477	FALSE	3.4817	4.32452e-14	TRUE
chr1_176159975_176160247	chr1	176159975	176160247	+	intron (NM_001286644, intron 3 of 17)	47133	64326	COP1	3.67266	4.29428e-06	TRUE	-0.39846	0.907578	FALSE	3.55557	4.86232e-06	TRUE	-4.07112	1.27578e-07	TRUE	-0.117094	0.920581	FALSE	3.95403	1.62839e-07	TRUE
chr6_139060317_139060660	chr6	139060317	139060660	+	Intergenic	31806	58527	ABRACL	3.67259	4.41923e-06	TRUE	0.810532	0.741228	FALSE	3.94545	4.22322e-08	TRUE	-2.86206	1.307e-05	TRUE	0.272862	0.777557	FALSE	3.13492	7.01395e-08	TRUE
chr12_104427423_104427952	chr12	104427423	104427952	+	Intergenic	-29227	50515	CHST11	3.7936	2.16591e-18	TRUE	0.78278	0.495454	FALSE	4.18512	6.94179e-26	TRUE	-3.01082	1.64212e-17	TRUE	0.391526	0.406254	FALSE	3.40234	1.65115e-25	TRUE
chr8_102106730_102107068	chr8	102106730	102107068	+	intron (NM_001040624, intron 1 of 7)	17435	83988	NCALD	3.67232	6.19767e-06	TRUE	2.67764	0.0270727	TRUE	4.15956	3.36543e-09	TRUE	-0.994679	0.121174	FALSE	0.487238	0.545487	FALSE	1.48192	0.00107219	TRUE
chr3_50573624_50573990	chr3	50573624	50573990	+	intron (NM_001317851, intron 4 of 10)	-2780	51161	C3orf18	1.29893	0.39221	FALSE	4.98366	1.45195e-12	TRUE	4.17629	1.58602e-08	TRUE	3.68472	5.18412e-12	TRUE	2.87736	0.000695252	TRUE	-0.807363	0.043126	FALSE
chr2_25831824_25832152	chr2	25831824	25832152	+	intron (NM_018263, intron 2 of 11)	46528	55252	ASXL2	3.66976	3.70805e-07	TRUE	0.525207	0.823357	FALSE	4.17131	9.05881e-11	TRUE	-3.14455	4.46274e-07	TRUE	0.50155	0.532875	FALSE	3.6461	3.93784e-11	TRUE
chr1_178566228_178566571	chr1	178566228	178566571	+	Intergenic	23603	400798	C1orf220	3.50729	8.4339e-08	TRUE	2.84441	0.000590493	TRUE	4.16853	4.46333e-13	TRUE	-0.66288	0.282852	FALSE	0.661234	0.332871	FALSE	1.32411	0.000799624	TRUE
chr11_47302499_47302738	chr11	47302499	47302738	+	intron (NM_003682, intron 24 of 35)	-30508	101928943	LOC101928943	3.67197	5.02198e-06	TRUE	0.124838	0.970887	FALSE	3.68592	1.38046e-06	TRUE	-3.54713	9.54105e-07	TRUE	0.0139543	0.991264	FALSE	3.56108	2.08966e-07	TRUE
chr4_163562647_163562859	chr4	163562647	163562859	+	intron (NM_017923, intron 2 of 3)	50871	55016	2018-03-01	3.67025	5.97703e-06	TRUE	2.24438	0.106857	FALSE	3.3639	4.08481e-05	TRUE	-1.42587	0.018424	TRUE	-0.306353	0.779682	FALSE	1.11952	0.0630007	FALSE
chrX_53188834_53189095	chrX	53188834	53189095	+	intron (NR_148674, intron 24 of 25)	6524	102465539	MIR6895	3.66667	1.35381e-09	TRUE	1.50279	0.228309	FALSE	3.87898	5.82634e-12	TRUE	-2.16387	2.23196e-06	TRUE	0.212312	0.798325	FALSE	2.37619	1.39563e-08	TRUE
chr3_188343476_188343663	chr3	188343476	188343663	+	intron (NM_001167671, intron 2 of 10)	118164	4026	LPP	3.65497	5.85109e-08	TRUE	1.89457	0.130443	FALSE	3.56898	5.18338e-08	TRUE	-1.7604	0.000328145	TRUE	-0.0859868	0.93487	FALSE	1.67442	0.000365161	TRUE
chr14_96189287_96189635	chr14	96189287	96189635	+	Intergenic	-15337	624	BDKRB2	3.6541	6.411e-08	TRUE	1.98079	0.103583	FALSE	3.51233	1.25386e-07	TRUE	-1.67331	0.000645537	TRUE	-0.141776	0.890565	FALSE	1.53154	0.00133209	TRUE
chr3_12197480_12197836	chr3	12197480	12197836	+	Intergenic	-38307	7079	TIMP4	3.6407	4.39688e-09	TRUE	1.09479	0.460672	FALSE	4.067	3.98416e-13	TRUE	-2.5459	2.5743e-07	TRUE	0.426302	0.542382	FALSE	2.97221	1.83412e-11	TRUE
chr10_112526237_112526464	chr10	112526237	112526464	+	intron (NM_001318203, intron 3 of 8)	-78804	64429	ZDHHC6	3.63836	0.00113005	TRUE	-2.52323	0.50012	FALSE	4.91287	8.91636e-10	TRUE	-6.16159	1.4419e-05	TRUE	1.27451	0.0768355	FALSE	7.4361	1.01211e-13	TRUE
chr16_89324361_89324604	chr16	89324361	89324604	+	exon (NM_001242885, exon 3 of 3)	3349	100287036	LOC100287036	3.63834	0.00113005	TRUE	0.993531	0.753155	FALSE	5.06394	6.85862e-11	TRUE	-2.64481	0.00471773	TRUE	1.42559	0.0344603	TRUE	4.0704	2.17137e-11	TRUE
chr12_112183260_112183513	chr12	112183260	112183513	+	intron (NM_001109662, intron 61 of 75)	-20065	102465519	MIR6861	3.638	0.0011472	TRUE	2.63944	0.13273	FALSE	4.46874	3.93689e-07	TRUE	-0.998558	0.304992	FALSE	0.830743	0.364289	FALSE	1.8293	0.00117044	TRUE
chr16_67311691_67312298	chr16	67311691	67312298	+	intron (NM_001100915, intron 2 of 15)	14777	146212	KCTD19	3.62996	1.26603e-14	TRUE	1.42205	0.125686	FALSE	4.30478	1.59768e-25	TRUE	-2.20791	6.52213e-10	TRUE	0.674821	0.111537	FALSE	2.88273	1.51389e-20	TRUE
chr6_20946128_20946409	chr6	20946128	20946409	+	intron (NM_017774, intron 9 of 15)	411811	54901	CDKAL1	3.6272	7.05686e-06	TRUE	0.508051	0.859262	FALSE	4.07553	5.8768e-09	TRUE	-3.11915	6.14536e-06	TRUE	0.448337	0.579107	FALSE	3.56748	1.47621e-09	TRUE
chr14_24053252_24053535	chr14	24053252	24053535	+	intron (NM_138360, intron 1 of 39)	1396	90668	CARMIL3	3.62209	5.13437e-09	TRUE	0.840754	0.615807	FALSE	4.16412	3.42235e-14	TRUE	-2.78134	4.50344e-08	TRUE	0.542026	0.399319	FALSE	3.32337	1.08668e-13	TRUE
chr11_110858706_110858985	chr11	110858706	110858985	+	Intergenic	-145656	57569	ARHGAP20	3.61929	2.06963e-05	TRUE	2.52453	0.0522036	FALSE	4.19869	9.91726e-09	TRUE	-1.09476	0.116445	FALSE	0.579403	0.499886	FALSE	1.67416	0.000708778	TRUE
chr2_215365350_215365638	chr2	215365350	215365638	+	intron (NM_212478, intron 43 of 45)	53538	471	ATIC	3.60314	7.36307e-05	TRUE	0.133021	0.969991	FALSE	4.00601	8.67316e-07	TRUE	-3.47012	3.29166e-05	TRUE	0.402874	0.736672	FALSE	3.87299	1.84678e-07	TRUE
chr6_151704503_151704729	chr6	151704503	151704729	+	intron (NM_001122742, intron 2 of 9)	14120	2099	ESR1	3.48007	4.98671e-05	TRUE	2.75353	0.0212721	TRUE	4.14315	8.19707e-09	TRUE	-0.726548	0.35996	FALSE	0.663076	0.412544	FALSE	1.38962	0.00309114	TRUE
chr1_173304046_173304308	chr1	173304046	173304308	+	intron (NR_037845, intron 2 of 2)	-96864	7292	TNFSF4	3.5982	2.11752e-09	TRUE	0.693226	0.70023	FALSE	3.66675	1.34135e-10	TRUE	-2.90497	5.40715e-09	TRUE	0.0685534	0.94512	FALSE	2.97352	2.86771e-10	TRUE
chr10_110361917_110362076	chr10	110361917	110362076	+	Intergenic	-57047	10285	SMNDC1	3.53378	2.3544e-05	TRUE	1.0599	0.625448	FALSE	4.13665	4.3589e-09	TRUE	-2.47389	0.000249858	TRUE	0.602871	0.441753	FALSE	3.07676	2.14021e-08	TRUE
chr17_49715788_49716144	chr17	49715788	49716144	+	intron (NM_030802, intron 7 of 7)	-8015	10237	SLC35B1	3.59775	5.76648e-07	TRUE	0.519297	0.825149	FALSE	3.84748	6.82437e-09	TRUE	-3.07845	6.82371e-07	TRUE	0.249728	0.803659	FALSE	3.32818	4.73264e-09	TRUE
chr2_10444594_10444777	chr2	10444594	10444777	+	intron (NM_002539, intron 3 of 11)	2164	100302743	SNORA80B	2.88791	0.000658148	TRUE	1.88945	0.15121	FALSE	4.13469	4.45418e-10	TRUE	-0.998454	0.226114	FALSE	1.24679	0.0893292	FALSE	2.24524	3.87003e-06	TRUE
chr14_80699977_80700262	chr14	80699977	80700262	+	intron (NM_152446, intron 18 of 23)	239421	145508	CEP128	3.59097	1.06235e-07	TRUE	-0.0302524	0.992151	FALSE	3.26694	2.06112e-06	TRUE	-3.62122	4.53267e-09	TRUE	-0.324024	0.712374	FALSE	3.2972	2.01904e-07	TRUE
chr1_28962417_28962859	chr1	28962417	28962859	+	intron (NM_001166006, intron 1 of 14)	48062	2035	EPB41	3.07612	0.0012193	TRUE	2.3418	0.0887668	FALSE	4.13008	2.10468e-08	TRUE	-0.734321	0.455811	FALSE	1.05396	0.19171	FALSE	1.78828	0.000387558	TRUE
chr3_40765942_40766291	chr3	40765942	40766291	+	Intergenic	241238	285268	ZNF621	3.30502	6.36411e-06	TRUE	0.921666	0.621955	FALSE	4.12891	6.49809e-12	TRUE	-2.38335	7.61179e-05	TRUE	0.823888	0.195381	FALSE	3.20724	2.29179e-11	TRUE
chr8_42177247_42177462	chr8	42177247	42177462	+	intron (NM_033011, intron 12 of 12)	24408	10947	AP3M2	3.89441	2.6847e-06	TRUE	1.06005	0.633768	FALSE	4.12658	6.07099e-08	TRUE	-2.83436	2.49364e-05	TRUE	0.232163	0.839922	FALSE	3.06653	4.7219e-07	TRUE
chr7_90792334_90792632	chr7	90792334	90792632	+	intron (NM_001287136, intron 4 of 13)	82667	5218	CDK14	2.91451	3.8326e-05	TRUE	1.82567	0.101812	FALSE	4.12183	7.22754e-14	TRUE	-1.08884	0.08121	FALSE	1.20732	0.033466	TRUE	2.29616	6.44832e-09	TRUE
chr5_157871110_157871583	chr5	157871110	157871583	+	Intergenic	-12171	9685	CLINT1	3.4785	5.16425e-05	TRUE	0.508315	0.859989	FALSE	4.12081	1.2378e-08	TRUE	-2.97019	6.53339e-05	TRUE	0.642308	0.435724	FALSE	3.6125	4.20201e-09	TRUE
chr1_200473730_200474116	chr1	200473730	200474116	+	Intergenic	-63865	23528	ZNF281	3.58929	2.60149e-07	TRUE	1.08326	0.532451	FALSE	3.85258	1.48272e-09	TRUE	-2.50603	6.28677e-06	TRUE	0.263292	0.77119	FALSE	2.76932	2.97601e-08	TRUE
chr6_4935572_4935836	chr6	4935572	4935836	+	exon (NM_004824, exon 3 of 7)	45712	9425	CDYL	3.56722	5.75469e-05	TRUE	2.8267	0.020937	TRUE	4.11975	1.05824e-07	TRUE	-0.740521	0.39062	FALSE	0.552523	0.576341	FALSE	1.29304	0.016897	TRUE
chr20_2118819_2119201	chr20	2118819	2119201	+	intron (NM_080836, intron 3 of 3)	17128	140901	STK35	3.13239	2.54374e-06	TRUE	1.67388	0.150374	FALSE	4.11604	1.73046e-14	TRUE	-1.45851	0.00609526	TRUE	0.98365	0.073815	FALSE	2.44216	3.07899e-10	TRUE
chr10_92267349_92267680	chr10	92267349	92267680	+	intron (NM_014912, intron 1 of 9)	23604	22849	CPEB3	3.58132	1.70839e-10	TRUE	1.10974	0.390477	FALSE	3.45994	3.88523e-10	TRUE	-2.47157	2.73754e-08	TRUE	-0.121376	0.894398	FALSE	2.3502	7.79278e-08	TRUE
chrX_19554803_19555165	chrX	19554803	19555165	+	intron (NM_001024666, intron 12 of 16)	-39723	389840	MAP3K15	3.62012	1.39381e-05	TRUE	1.27239	0.524189	FALSE	4.11126	1.37884e-08	TRUE	-2.34773	0.000367885	TRUE	0.491145	0.569899	FALSE	2.83888	2.80067e-07	TRUE
chr18_49360670_49360931	chr18	49360670	49360931	+	intron (NM_001353213, intron 6 of 17)	99933	54808	DYM	3.14073	0.000891836	TRUE	3.84175	1.59852e-05	TRUE	4.10962	4.22583e-08	TRUE	0.701018	0.346325	FALSE	0.968896	0.247327	FALSE	0.267878	0.638137	FALSE
chr5_111144448_111144659	chr5	111144448	111144659	+	Intergenic	52381	134430	WDR36	3.42955	4.92557e-05	TRUE	1.77073	0.277679	FALSE	4.10644	3.52091e-09	TRUE	-1.65882	0.0114532	TRUE	0.676888	0.364289	FALSE	2.33571	1.67256e-06	TRUE
chr2_120105457_120105706	chr2	120105457	120105706	+	non-coding (NR_135920, exon 18 of 18)	92372	57669	EPB41L5	2.85093	0.00327425	TRUE	1.77072	0.277679	FALSE	4.10642	3.52091e-09	TRUE	-1.08022	0.237115	FALSE	1.25549	0.0739047	FALSE	2.3357	1.67256e-06	TRUE
chr6_72741174_72741379	chr6	72741174	72741379	+	intron (NM_001160132, intron 1 of 13)	110781	100507381	KCNQ5-IT1	3.58128	1.41203e-05	TRUE	2.14015	0.137342	FALSE	4.50493	5.47098e-12	TRUE	-1.44113	0.021394	TRUE	0.92365	0.144596	FALSE	2.36478	4.9244e-08	TRUE
chr4_113330428_113330754	chr4	113330428	113330754	+	intron (NM_001354279, intron 8 of 24)	37752	287	ANK2	3.67199	5.92355e-06	TRUE	0.810994	0.741591	FALSE	4.10224	7.34164e-09	TRUE	-2.861	1.8668e-05	TRUE	0.430251	0.610826	FALSE	3.29125	9.69683e-09	TRUE
chr1_180805370_180805624	chr1	180805370	180805624	+	intron (NM_001135669, intron 4 of 13)	-107680	57710	KIAA1614	3.71756	3.9239e-06	TRUE	1.906	0.223945	FALSE	4.10152	8.3874e-09	TRUE	-1.81156	0.00247016	TRUE	0.383959	0.662342	FALSE	2.19552	1.01042e-05	TRUE
chr7_148584426_148584803	chr7	148584426	148584803	+	Intergenic	-5951	202865	C7orf33	3.5702	5.15607e-09	TRUE	0.528074	0.790916	FALSE	4.10016	2.40927e-14	TRUE	-3.04213	4.63686e-09	TRUE	0.529957	0.386317	FALSE	3.57209	4.01121e-15	TRUE
chr12_103952530_103952789	chr12	103952530	103952789	+	intron (NM_001135570, intron 2 of 2)	4556	728568	C12orf73	3.58003	1.67349e-05	TRUE	-0.397908	0.907909	FALSE	4.09916	9.54704e-09	TRUE	-3.97794	8.02351e-07	TRUE	0.519127	0.52707	FALSE	4.49706	6.58873e-11	TRUE
chr3_78277297_78277595	chr3	78277297	78277595	+	Intergenic	-228483	105377172	LINC02077	3.62048	1.34506e-05	TRUE	-0.400037	0.907578	FALSE	4.09833	1.48415e-08	TRUE	-4.02051	6.13518e-07	TRUE	0.47785	0.581331	FALSE	4.49836	1.17732e-10	TRUE
chr12_88299676_88299991	chr12	88299676	88299991	+	Intergenic	157537	160418	TMTC3	3.37201	0.000151646	TRUE	2.02601	0.182461	FALSE	4.09816	3.08204e-08	TRUE	-1.346	0.0674993	FALSE	0.726152	0.392339	FALSE	2.07215	7.01709e-05	TRUE
chr4_25938872_25939211	chr4	25938872	25939211	+	Intergenic	24849	389203	SMIM20	3.16912	2.81749e-06	TRUE	2.13583	0.0338604	TRUE	4.09771	2.24147e-13	TRUE	-1.0333	0.071856	FALSE	0.928586	0.124728	FALSE	1.96188	4.73779e-07	TRUE
chr12_121613549_121613759	chr12	121613549	121613759	+	Intergenic	-12896	84876	ORAI1	3.58033	1.14107e-05	TRUE	1.45887	0.426226	FALSE	3.80169	2.76057e-07	TRUE	-2.12146	0.000728415	TRUE	0.221365	0.831512	FALSE	2.34282	2.00479e-05	TRUE
chr2_112821223_112821537	chr2	112821223	112821537	+	Intergenic	15399	3553	IL1B	2.92707	9.59416e-06	TRUE	2.04303	0.0306206	TRUE	4.08865	3.58515e-14	TRUE	-0.884038	0.157496	FALSE	1.16159	0.0530812	FALSE	2.04563	1.8298e-07	TRUE
chr11_104016100_104016319	chr11	104016100	104016319	+	intron (NM_025208, intron 1 of 6)	-20371	414301	DDI1	3.58027	1.14107e-05	TRUE	-0.398477	0.907578	FALSE	3.68379	1.16899e-06	TRUE	-3.97874	4.67412e-07	TRUE	0.103526	0.929808	FALSE	4.08227	2.6187e-08	TRUE
chr9_112845217_112845436	chr9	112845217	112845436	+	intron (NM_001012994, intron 6 of 8)	45587	57864	SLC46A2	3.67224	5.76827e-06	TRUE	2.13974	0.13775	FALSE	4.07842	1.01579e-08	TRUE	-1.5325	0.0109087	TRUE	0.406179	0.638465	FALSE	1.93868	5.98539e-05	TRUE
chr1_42661186_42661342	chr1	42661186	42661342	+	intron (NM_001330510, intron 5 of 9)	2887	10465	PPIH	4.25377	1.74574e-09	TRUE	1.27328	0.519546	FALSE	4.0759	6.79094e-09	TRUE	-2.98049	2.2417e-08	TRUE	-0.177873	0.847387	FALSE	2.80262	1.23834e-07	TRUE
chr10_84171470_84171672	chr10	84171470	84171672	+	intron (NR_134505, intron 1 of 1)	505	642934	CERNA2	3.57891	1.46553e-05	TRUE	2.67629	0.0267281	TRUE	4.16638	2.49036e-09	TRUE	-0.902615	0.183794	FALSE	0.587469	0.446813	FALSE	1.49008	0.000875367	TRUE
chr17_44142505_44142737	chr17	44142505	44142737	+	intron (NM_001171251, intron 1 of 9)	719	78995	C17orf53	3.57835	2.14303e-05	TRUE	2.51702	0.0501199	FALSE	3.67764	2.77711e-06	TRUE	-1.06133	0.121202	FALSE	0.0992854	0.938315	FALSE	1.16062	0.0360677	TRUE
chr15_50880673_50880831	chr15	50880673	50880831	+	Intergenic	-27920	23431	AP4E1	3.62675	7.84519e-06	TRUE	2.51937	0.0458915	TRUE	4.07546	7.45209e-09	TRUE	-1.10738	0.0763621	FALSE	0.448706	0.585113	FALSE	1.55608	0.000686697	TRUE
chr17_16964723_16964957	chr17	16964723	16964957	+	intron (NM_012452, intron 1 of 4)	7248	23495	TNFRSF13B	3.3749	8.80275e-05	TRUE	2.14006	0.136353	FALSE	4.07482	7.71064e-09	TRUE	-1.23484	0.0752872	FALSE	0.699919	0.362706	FALSE	1.93476	4.79796e-05	TRUE
chr12_77995408_77995692	chr12	77995408	77995692	+	intron (NM_001024383, intron 6 of 39)	164261	89795	NAV3	3.57827	1.50539e-05	TRUE	2.13914	0.138001	FALSE	4.63808	3.98284e-13	TRUE	-1.43913	0.0223066	TRUE	1.05981	0.073763	FALSE	2.49894	3.90475e-09	TRUE
chr14_21449364_21449888	chr14	21449364	21449888	+	Intergenic	-12328	57680	CHD8	3.57558	1.43272e-10	TRUE	-0.177829	0.939297	FALSE	3.28603	5.67313e-09	TRUE	-3.75341	6.73993e-13	TRUE	-0.289544	0.709127	FALSE	3.46386	6.86692e-11	TRUE
chr6_111159741_111159975	chr6	111159741	111159975	+	intron (NM_018593, intron 1 of 5)	46024	109623478	SNORD166	3.00981	0.00190432	TRUE	1.45941	0.43535	FALSE	4.06498	5.91304e-08	TRUE	-1.5504	0.0711251	FALSE	1.05518	0.207733	FALSE	2.60558	4.14405e-06	TRUE
chr5_143341915_143342123	chr5	143341915	143342123	+	intron (NM_001018074, intron 2 of 8)	61670	2908	NR3C1	2.773	0.00612649	TRUE	2.02768	0.180111	FALSE	4.06493	3.43983e-08	TRUE	-0.745322	0.50159	FALSE	1.29192	0.103319	FALSE	2.03725	8.06283e-05	TRUE
chr1_248779263_248779742	chr1	248779263	248779742	+	Intergenic	-23715	646627	LYPD8	3.30105	1.12228e-05	TRUE	0.922206	0.624688	FALSE	4.06022	1.3269e-10	TRUE	-2.37885	0.000142344	TRUE	0.75917	0.287507	FALSE	3.13802	7.43317e-10	TRUE
chr2_214737186_214737670	chr2	214737186	214737670	+	intron (NM_001282549, intron 3 of 4)	72283	580	BARD1	3.6655	4.10283e-09	TRUE	0.133567	0.957885	FALSE	4.05332	8.03719e-13	TRUE	-3.53193	3.62064e-10	TRUE	0.387826	0.597698	FALSE	3.91976	1.41124e-14	TRUE
chr15_64246828_64247134	chr15	64246828	64247134	+	intron (NM_001329607, intron 4 of 11)	-83826	5479	PPIB	3.48815	7.59092e-07	TRUE	2.4116	0.0228692	TRUE	4.05321	2.85927e-11	TRUE	-1.07654	0.051038	FALSE	0.56506	0.414795	FALSE	1.6416	4.79843e-05	TRUE
chr4_82353000_82353307	chr4	82353000	82353307	+	TTS (NM_002138)	20843	3184	HNRNPD	3.77185	1.11159e-08	TRUE	0.733871	0.721046	FALSE	4.05203	1.69156e-11	TRUE	-3.03798	2.08331e-08	TRUE	0.280184	0.723449	FALSE	3.31816	1.52181e-11	TRUE
chr1_199546212_199546729	chr1	199546212	199546729	+	Intergenic	397872	400800	LOC400800	3.57367	1.68e-10	TRUE	0.665971	0.682565	FALSE	3.9841	3.51604e-15	TRUE	-2.9077	5.65491e-10	TRUE	0.410429	0.508624	FALSE	3.31813	3.6513e-15	TRUE
chr13_66128705_66129151	chr13	66128705	66129151	+	Intergenic	-89322	100616205	MIR4704	3.55705	2.1768e-10	TRUE	0.665986	0.682565	FALSE	4.04795	6.43966e-16	TRUE	-2.89106	7.89289e-10	TRUE	0.490898	0.40689	FALSE	3.38196	5.51797e-16	TRUE
chr3_41846873_41847156	chr3	41846873	41847156	+	intron (NR_136342, intron 16 of 34)	115426	54986	ULK4	3.52642	3.11886e-05	TRUE	1.27252	0.523502	FALSE	4.05014	2.69615e-08	TRUE	-2.2539	0.000835642	TRUE	0.523721	0.542311	FALSE	2.77762	5.81501e-07	TRUE
chr1_181151983_181152332	chr1	181151983	181152332	+	Intergenic	-22327	101928973	LINC01732	3.55654	3.25782e-07	TRUE	2.06119	0.0832427	FALSE	4.2297	7.82714e-13	TRUE	-1.49536	0.00394462	TRUE	0.673153	0.283505	FALSE	2.16851	7.16013e-08	TRUE
chr15_39969036_39969317	chr15	39969036	39969317	+	intron (NM_001013703, intron 9 of 38)	35052	440275	EIF2AK4	3.07004	0.000882974	TRUE	-0.398745	0.907578	FALSE	4.04546	1.14961e-08	TRUE	-3.46879	0.000129818	TRUE	0.975419	0.192138	FALSE	4.4442	7.54224e-11	TRUE
chr12_14396149_14396347	chr12	14396149	14396347	+	intron (NM_181352, intron 1 of 14)	11184	55729	ATF7IP	2.99682	0.000135955	TRUE	1.4896	0.308852	FALSE	4.04499	3.84652e-11	TRUE	-1.50722	0.0223891	TRUE	1.04817	0.102706	FALSE	2.5554	1.57449e-08	TRUE
chr17_8966986_8967183	chr17	8966986	8967183	+	Intergenic	-1372	23533	PIK3R5	2.85131	0.00336349	TRUE	3.22982	0.00127514	TRUE	4.04414	1.15331e-08	TRUE	0.378514	0.716425	FALSE	1.19282	0.104206	FALSE	0.814311	0.0711292	FALSE
chr2_169354304_169354595	chr2	169354304	169354595	+	intron (NM_004525, intron 1 of 78)	8163	4036	LRP2	3.71682	2.72842e-06	TRUE	2.51964	0.0452089	TRUE	4.0441	9.97501e-09	TRUE	-1.19719	0.0412236	TRUE	0.327276	0.711614	FALSE	1.52446	0.000883737	TRUE
chr4_121168866_121169229	chr4	121168866	121169229	+	intron (NM_001128843, intron 3 of 12)	-4707	79931	TNIP3	3.6834	6.07848e-08	TRUE	1.23191	0.44781	FALSE	4.04402	3.5554e-11	TRUE	-2.4515	3.48666e-06	TRUE	0.360621	0.63833	FALSE	2.81212	1.68957e-09	TRUE
chr1_41639332_41639529	chr1	41639332	41639529	+	intron (NM_001127714, intron 1 of 7)	-154747	1907	EDN2	3.26342	0.000243004	TRUE	2.67763	0.0268062	TRUE	4.04288	1.77249e-08	TRUE	-0.585786	0.520997	FALSE	0.779465	0.321255	FALSE	1.36525	0.00351484	TRUE
chr2_20430945_20431240	chr2	20430945	20431240	+	Intergenic	-15979	388	RHOB	3.55549	2.35292e-07	TRUE	2.21073	0.0485918	TRUE	3.96715	7.3033e-11	TRUE	-1.34476	0.00813099	TRUE	0.411658	0.574572	FALSE	1.75642	1.81861e-05	TRUE
chr5_83844644_83844974	chr5	83844644	83844974	+	Intergenic	-123732	1404	HAPLN1	4.10812	4.00596e-13	TRUE	1.58969	0.187976	FALSE	4.03747	3.04967e-13	TRUE	-2.51843	1.89481e-09	TRUE	-0.0706444	0.93781	FALSE	2.44778	1.93936e-09	TRUE
chr15_52006410_52006755	chr15	52006410	52006755	+	Intergenic	-12632	5597	MAPK6	3.25745	9.1804e-07	TRUE	1.67145	0.156111	FALSE	4.03147	8.03719e-13	TRUE	-1.586	0.00255178	TRUE	0.774022	0.218796	FALSE	2.36002	1.11625e-08	TRUE
chr3_122533929_122534293	chr3	122533929	122534293	+	3' UTR (NM_001146106, exon 10 of 10)	-19172	3836	KPNA1	3.36252	4.86989e-09	TRUE	1.77249	0.0728904	FALSE	4.02963	4.49555e-16	TRUE	-1.59003	0.00024778	TRUE	0.66711	0.219665	FALSE	2.25714	2.09688e-10	TRUE
chr7_106345865_106346092	chr7	106345865	106346092	+	Intergenic	-60786	10135	NAMPT	3.55342	0.00209547	TRUE	3.008	0.0566957	FALSE	4.93551	1.91723e-09	TRUE	-0.545424	0.660656	FALSE	1.38209	0.0692961	FALSE	1.92751	0.00010264	TRUE
chr10_79799396_79799645	chr10	79799396	79799645	+	intron (NR_120612, intron 5 of 5)	-26382	642361	LOC642361	3.53329	2.31781e-05	TRUE	1.90547	0.223026	FALSE	3.90699	1.07305e-07	TRUE	-1.62782	0.011004	TRUE	0.373699	0.69306	FALSE	2.00152	0.00011283	TRUE
chr15_72131955_72132255	chr15	72131955	72132255	+	intron (NM_145204, intron 1 of 1)	13815	123228	SENP8	3.62175	2.07793e-05	TRUE	1.27428	0.52611	FALSE	4.01542	1.02017e-07	TRUE	-2.34747	0.000562415	TRUE	0.393673	0.693947	FALSE	2.74114	2.54886e-06	TRUE
chr18_12819350_12819640	chr18	12819350	12819640	+	intron (NM_001207013, intron 5 of 10)	21467	5771	PTPN2	3.87719	6.81619e-07	TRUE	1.77068	0.281965	FALSE	4.01457	3.33943e-08	TRUE	-2.10651	0.000238459	TRUE	0.137377	0.897389	FALSE	2.24389	1.57831e-05	TRUE
chr2_218041599_218041885	chr2	218041599	218041885	+	intron (NR_034176, intron 2 of 13)	6808	285180	RUFY4	3.5309	2.19724e-05	TRUE	-0.398816	0.907578	FALSE	4.01452	2.16733e-08	TRUE	-3.92971	1.10512e-06	TRUE	0.483624	0.565696	FALSE	4.41334	1.71318e-10	TRUE
chr9_114718909_114719221	chr9	114718909	114719221	+	Intergenic	-36976	100505478	TEX48	2.59984	0.00235587	TRUE	3.784	5.80492e-08	TRUE	4.01375	4.45709e-11	TRUE	1.18416	0.0140635	TRUE	1.41391	0.0222071	TRUE	0.229751	0.605685	FALSE
chr2_232236291_232236539	chr2	232236291	232236539	+	intron (NM_152383, intron 10 of 20)	63762	693147	MIR562	3.07031	0.000875162	TRUE	2.13987	0.135853	FALSE	4.0123	1.8285e-08	TRUE	-0.930438	0.276061	FALSE	0.941989	0.213198	FALSE	1.87243	0.000103382	TRUE
chr11_96112687_96113048	chr11	96112687	96113048	+	intron (NM_032427, intron 1 of 4)	-188660	8898	MTMR2	3.53225	7.13476e-10	TRUE	1.36565	0.243527	FALSE	3.55747	1.14261e-10	TRUE	-2.16661	1.19239e-06	TRUE	0.0252204	0.981852	FALSE	2.19183	2.49724e-07	TRUE
chr6_34656349_34656638	chr6	34656349	34656638	+	intron (NM_022758, intron 1 of 3)	-39661	101929243	LOC101929243	2.66246	0.00137067	TRUE	1.89603	0.127443	FALSE	4.01192	1.45908e-11	TRUE	-0.766428	0.368764	FALSE	1.34947	0.0221084	TRUE	2.11589	2.32172e-07	TRUE
chr6_75147633_75147898	chr6	75147633	75147898	+	exon (NM_080645, exon 8 of 51)	-18983	109623475	SNORD156	3.71675	2.63659e-06	TRUE	0.81045	0.741156	FALSE	4.01177	1.52791e-08	TRUE	-2.9063	7.067e-06	TRUE	0.295026	0.747973	FALSE	3.20132	2.12604e-08	TRUE
chr6_90144500_90144658	chr6	90144500	90144658	+	intron (NM_001170794, intron 2 of 6)	152329	60468	BACH2	3.53157	1.93531e-05	TRUE	2.60072	0.0340046	TRUE	4.16641	1.47632e-09	TRUE	-0.930845	0.167714	FALSE	0.634837	0.388429	FALSE	1.56568	0.00035679	TRUE
chr21_25578355_25578677	chr21	25578355	25578677	+	Intergenic	4536	406947	MIR155	3.96439	6.25202e-12	TRUE	2.39736	0.00876763	TRUE	4.00985	4.88202e-13	TRUE	-1.56703	8.8801e-05	TRUE	0.0454673	0.963316	FALSE	1.6125	1.70214e-05	TRUE
chr8_81108207_81108378	chr8	81108207	81108378	+	intron (NM_018440, intron 1 of 8)	3776	55824	PAG1	3.79393	4.33742e-06	TRUE	2.67557	0.0322352	TRUE	4.00958	1.43214e-07	TRUE	-1.11836	0.0861451	FALSE	0.215646	0.853419	FALSE	1.334	0.0109041	TRUE
chr6_4607917_4608106	chr6	4607917	4608106	+	Intergenic	-2554	497048	KU-MEL-3	3.53153	1.94676e-05	TRUE	1.45875	0.42673	FALSE	3.91019	7.13835e-08	TRUE	-2.07278	0.00123107	TRUE	0.378658	0.677988	FALSE	2.45144	4.91312e-06	TRUE
chr12_57268371_57268643	chr12	57268371	57268643	+	intron (NM_001351214, intron 16 of 22)	-17314	246329	STAC3	3.53132	2.14303e-05	TRUE	1.62309	0.345623	FALSE	3.7258	8.92099e-07	TRUE	-1.90823	0.00288291	TRUE	0.194476	0.862191	FALSE	2.1027	0.000159663	TRUE
chr13_48403186_48403403	chr13	48403186	48403403	+	intron (NM_000321, intron 17 of 26)	10223	10161	LPAR6	3.52431	2.26191e-07	TRUE	1.80379	0.158704	FALSE	3.56784	3.08693e-08	TRUE	-1.72052	0.000596848	TRUE	0.0435326	0.96945	FALSE	1.76405	0.000127588	TRUE
chr10_78763829_78764138	chr10	78763829	78764138	+	Intergenic	303465	283050	ZMIZ1-AS1	4.07606	4.36851e-10	TRUE	3.75356	3.16199e-07	TRUE	4.0027	3.63701e-10	TRUE	-0.322502	0.652105	FALSE	-0.0733597	0.946159	FALSE	0.249143	0.612473	FALSE
chr10_89367524_89367871	chr10	89367524	89367871	+	Intergenic	-10359	439996	IFIT1B	3.52251	3.05865e-08	TRUE	1.21028	0.391276	FALSE	3.77578	1.38242e-10	TRUE	-2.31223	4.46678e-06	TRUE	0.253266	0.775366	FALSE	2.56549	2.32933e-08	TRUE
chr5_171989312_171989603	chr5	171989312	171989603	+	intron (NM_012300, intron 1 of 12)	17416	23291	FBXW11	4.06594	1.19271e-07	TRUE	2.02695	0.180362	FALSE	3.99738	8.24103e-08	TRUE	-2.03899	0.000201781	TRUE	-0.0685538	0.955153	FALSE	1.97043	0.000177419	TRUE
chr6_70531222_70531583	chr6	70531222	70531583	+	intron (NM_001105531, intron 16 of 21)	-35520	135154	SDHAF4	3.52037	1.70673e-09	TRUE	1.43511	0.211105	FALSE	3.09761	2.62607e-07	TRUE	-2.08526	4.62407e-06	TRUE	-0.42276	0.587979	FALSE	1.6625	0.000493092	TRUE
chr22_29821311_29821605	chr22	29821311	29821605	+	intron (NM_001242906, intron 4 of 18)	16846	84164	ASCC2	3.31947	0.000211112	TRUE	0.811889	0.742951	FALSE	3.99258	8.41407e-08	TRUE	-2.50758	0.00100198	TRUE	0.673113	0.440211	FALSE	3.1807	1.72209e-07	TRUE
chrX_149795619_149795903	chrX	149795619	149795903	+	Intergenic	13824	4108	MAGEA9	3.40343	0.000194018	TRUE	0.119536	0.972399	FALSE	3.99178	4.05383e-07	TRUE	-3.28389	8.91171e-05	TRUE	0.588351	0.558411	FALSE	3.87224	5.89928e-08	TRUE
chr3_56864043_56864506	chr3	56864043	56864506	+	intron (NM_001289698, intron 2 of 10)	52197	50650	ARHGEF3	3.51967	4.65883e-10	TRUE	0.789789	0.602096	FALSE	3.74652	1.09003e-12	TRUE	-2.72988	4.75371e-09	TRUE	0.226855	0.774677	FALSE	2.95673	7.64064e-12	TRUE
chr20_19860792_19861081	chr20	19860792	19861081	+	Intergenic	-25585	54453	RIN2	2.9893	0.00207935	TRUE	1.27325	0.52611	FALSE	3.98396	1.50075e-07	TRUE	-1.71605	0.0455524	TRUE	0.99466	0.244079	FALSE	2.71071	3.85763e-06	TRUE
chr6_155171162_155171668	chr6	155171162	155171668	+	intron (NM_012454, intron 8 of 25)	-45548	26230	TIAM2	3.18639	5.72163e-06	TRUE	1.81935	0.114243	FALSE	3.98313	3.30413e-11	TRUE	-1.36704	0.0202472	TRUE	0.79674	0.266413	FALSE	2.16378	1.19679e-06	TRUE
chr1_19186058_19186427	chr1	19186058	19186427	+	intron (NM_020765, intron 14 of 105)	24010	23352	UBR4	3.53096	2.21536e-05	TRUE	1.90477	0.222437	FALSE	3.98156	3.50908e-08	TRUE	-1.62619	0.0106506	TRUE	0.450606	0.603089	FALSE	2.07679	3.92406e-05	TRUE
chr10_48358189_48358429	chr10	48358189	48358429	+	intron (NM_001323322, intron 3 of 13)	-43303	5599	MAPK8	3.20382	0.000405621	TRUE	0.125174	0.970887	FALSE	3.98047	5.30695e-08	TRUE	-3.07864	0.000212019	TRUE	0.776647	0.344734	FALSE	3.85529	4.19145e-09	TRUE
chrX_24080752_24081116	chrX	24080752	24081116	+	Intergenic	25986	1968	EIF2S3	3.87769	3.95608e-09	TRUE	1.23029	0.449461	FALSE	3.97949	1.61154e-10	TRUE	-2.64741	2.00504e-07	TRUE	0.1018	0.917123	FALSE	2.74921	8.38942e-09	TRUE
chr10_110251404_110251737	chr10	110251404	110251737	+	intron (NM_005962, intron 3 of 5)	25566	4601	MXI1	3.50591	1.98068e-11	TRUE	-1.37236	0.439023	FALSE	3.7207	2.72081e-14	TRUE	-4.87827	1.85214e-17	TRUE	0.214794	0.772939	FALSE	5.09306	5.55254e-21	TRUE
chr1_173333674_173333861	chr1	173333674	173333861	+	intron (NR_037845, intron 2 of 2)	-126454	7292	TNFSF4	2.32402	0.0135554	TRUE	2.41271	0.0275341	TRUE	3.97405	1.26396e-09	TRUE	0.0886844	0.955475	FALSE	1.65003	0.020091	TRUE	1.56135	0.000640101	TRUE
chr8_128016544_128016766	chr8	128016544	128016766	+	intron (NR_003367, intron 5 of 8)	7757	100302170	MIR1206	3.26655	5.16708e-07	TRUE	1.82019	0.0998386	FALSE	3.96778	7.44151e-13	TRUE	-1.44636	0.00439268	TRUE	0.701232	0.25406	FALSE	2.14759	5.09226e-08	TRUE
chr3_127808171_127808629	chr3	127808171	127808629	+	intron (NM_001003794, intron 2 of 7)	14482	11343	MGLL	3.4979	2.26226e-07	TRUE	0.13288	0.958699	FALSE	3.89244	2.9347e-10	TRUE	-3.36502	4.3588e-08	TRUE	0.394542	0.656124	FALSE	3.75956	2.18588e-11	TRUE
chr5_116373042_116373514	chr5	116373042	116373514	+	intron (NR_104675, intron 1 of 2)	1292	101927190	LOC101927190	3.49771	2.67498e-11	TRUE	0.41088	0.812531	FALSE	3.36764	7.30848e-11	TRUE	-3.08683	1.25476e-11	TRUE	-0.130066	0.882139	FALSE	2.95676	4.27174e-11	TRUE
chr3_141489279_141489522	chr3	141489279	141489522	+	intron (NM_001303245, intron 1 of 23)	2353	5922	RASA2	3.49482	1.66299e-08	TRUE	0.343235	0.878721	FALSE	3.96696	4.82523e-13	TRUE	-3.15158	5.20171e-09	TRUE	0.472143	0.466785	FALSE	3.62373	2.66246e-14	TRUE
chr2_58006736_58006966	chr2	58006736	58006966	+	intron (NM_001288838, intron 1 of 15)	-39791	7444	VRK2	2.85193	0.00409583	TRUE	1.27399	0.524386	FALSE	3.9647	1.22576e-07	TRUE	-1.57794	0.0804799	FALSE	1.11277	0.181859	FALSE	2.69071	3.10264e-06	TRUE
chr1_173276863_173277289	chr1	173276863	173277289	+	intron (NR_037845, intron 2 of 2)	-69763	7292	TNFSF4	3.73405	4.70413e-12	TRUE	0.788857	0.601493	FALSE	3.96419	3.54309e-15	TRUE	-2.94519	3.22935e-11	TRUE	0.230138	0.749554	FALSE	3.17533	1.29644e-14	TRUE
chr3_15746015_15746285	chr3	15746015	15746285	+	intron (NM_001349282, intron 4 of 27)	10401	23243	ANKRD28	3.07109	0.00113165	TRUE	0.507331	0.860252	FALSE	3.96345	1.13397e-07	TRUE	-2.56376	0.00236954	TRUE	0.892361	0.288563	FALSE	3.45612	5.64873e-08	TRUE
chr5_82818373_82818622	chr5	82818373	82818622	+	Intergenic	-21658	100616297	MIR3977	3.48969	4.26837e-07	TRUE	0.734688	0.719707	FALSE	4.01201	1.68116e-11	TRUE	-2.75501	1.38365e-06	TRUE	0.522317	0.432877	FALSE	3.27732	1.43348e-11	TRUE
chr5_170572469_170572886	chr5	170572469	170572886	+	intron (NM_014592, intron 1 of 7)	68641	30820	KCNIP1	3.62287	4.72222e-09	TRUE	1.21298	0.388285	FALSE	3.95787	2.22032e-12	TRUE	-2.40989	7.27196e-07	TRUE	0.335	0.6575	FALSE	2.74489	3.37819e-10	TRUE
chr9_22073374_22073647	chr9	22073374	22073647	+	intron (NR_003529, intron 12 of 18)	-64197	1030	CDKN2B	2.17274	0.177983	FALSE	4.74627	3.17434e-07	TRUE	3.9569	6.06966e-05	TRUE	2.57352	2.53143e-05	TRUE	1.78416	0.116865	FALSE	-0.789366	0.110547	FALSE
chr8_125151752_125152039	chr8	125151752	125152039	+	intron (NM_001349485, intron 3 of 6)	60072	286053	NSMCE2	3.05987	1.02455e-05	TRUE	2.95314	0.000161532	TRUE	3.95625	5.43369e-12	TRUE	-0.106723	0.922138	FALSE	0.896384	0.165299	FALSE	1.00311	0.0109231	TRUE
chr12_103698710_103699068	chr12	103698710	103699068	+	intron (NM_017564, intron 33 of 68)	111598	55576	STAB2	3.48917	3.46681e-07	TRUE	-1.76613	0.49358	FALSE	3.62779	1.13241e-08	TRUE	-5.2553	5.4592e-11	TRUE	0.138617	0.889141	FALSE	5.39392	4.40584e-13	TRUE
chr2_177169877_177170074	chr2	177169877	177170074	+	Intergenic	-42719	220988	HNRNPA3	3.48913	4.04286e-07	TRUE	1.085	0.526689	FALSE	3.33932	8.18326e-07	TRUE	-2.40413	1.02328e-05	TRUE	-0.149811	0.887295	FALSE	2.25431	2.52375e-05	TRUE
chr6_167833466_167833699	chr6	167833466	167833699	+	intron (NM_001291964, intron 1 of 32)	5947	4301	AFDN	0.694643	0.782458	FALSE	4.57267	1.85576e-06	TRUE	3.95251	5.37955e-05	TRUE	3.87803	4.508e-07	TRUE	3.25787	0.0124082	TRUE	-0.620159	0.230265	FALSE
chr2_111316986_111317302	chr2	111316986	111317302	+	intron (NR_136161, intron 3 of 5)	3942	100616341	MIR4435-2	3.48852	2.85321e-08	TRUE	1.6685	0.154415	FALSE	3.94181	1.89233e-12	TRUE	-1.82002	0.000132496	TRUE	0.453287	0.506611	FALSE	2.2733	2.45626e-08	TRUE
chr8_106745360_106745735	chr8	106745360	106745735	+	intron (NM_001198533, intron 15 of 16)	19440	55074	OXR1	3.48756	5.60758e-07	TRUE	-0.0303836	0.992151	FALSE	3.71742	5.6225e-09	TRUE	-3.51795	3.76481e-08	TRUE	0.229853	0.802994	FALSE	3.7478	1.39996e-10	TRUE
chr7_74599350_74599627	chr7	74599350	74599627	+	intron (NM_016328, intron 25 of 26)	-58177	2969	GTF2I	3.00329	0.00148108	TRUE	2.02701	0.174926	FALSE	3.94835	6.83316e-08	TRUE	-0.976276	0.272172	FALSE	0.945063	0.237517	FALSE	1.92134	0.000158276	TRUE
chr2_25817676_25817949	chr2	25817676	25817949	+	intron (NM_018263, intron 2 of 11)	60704	55252	ASXL2	3.42885	5.58284e-05	TRUE	-3.39199	0.293023	FALSE	3.94766	5.24035e-08	TRUE	-6.82084	1.81844e-08	TRUE	0.518806	0.54023	FALSE	7.33965	1.22728e-12	TRUE
chr21_14453384_14453653	chr21	14453384	14453653	+	Intergenic	-70330	6782	HSPA13	3.4855	4.05019e-05	TRUE	2.24579	0.107749	FALSE	4.30621	3.75023e-10	TRUE	-1.23971	0.0666666	FALSE	0.820715	0.246439	FALSE	2.06043	6.45275e-06	TRUE
chr14_65704892_65705239	chr14	65704892	65705239	+	intron (NR_038167, intron 7 of 8)	233963	693210	MIR625	2.99411	0.00010641	TRUE	1.98229	0.101501	FALSE	3.94562	7.40353e-11	TRUE	-1.01182	0.13476	FALSE	0.951511	0.134363	FALSE	1.96333	2.39488e-06	TRUE
chr11_45215587_45215829	chr11	45215587	45215829	+	intron (NM_001359633, intron 6 of 7)	68365	56981	PRDM11	3.48157	3.01947e-05	TRUE	1.6232	0.343887	FALSE	3.5556	4.86232e-06	TRUE	-1.85836	0.00395206	TRUE	0.0740366	0.955144	FALSE	1.9324	0.000820085	TRUE
chr18_21084499_21084821	chr18	21084499	21084821	+	intron (NM_005406, intron 1 of 32)	27191	6093	ROCK1	3.48122	3.13845e-05	TRUE	-0.398614	0.907578	FALSE	3.80129	2.95173e-07	TRUE	-3.87984	1.68914e-06	TRUE	0.320066	0.747929	FALSE	4.1999	4.69991e-09	TRUE
chr13_29791559_29791849	chr13	29791559	29791849	+	intron (NM_007106, intron 1 of 4)	58979	5412	UBL3	3.00107	0.001325	TRUE	1.77076	0.277679	FALSE	3.94509	3.99961e-08	TRUE	-1.23031	0.136759	FALSE	0.944026	0.218954	FALSE	2.17433	1.90966e-05	TRUE
chr2_38667042_38667385	chr2	38667042	38667385	+	intron (NM_138801, intron 1 of 6)	1303	130589	GALM	3.47974	2.86474e-15	TRUE	1.61455	0.0320292	TRUE	3.94912	8.09519e-23	TRUE	-1.86519	1.91359e-08	TRUE	0.469379	0.330756	FALSE	2.33457	5.40739e-15	TRUE
chr1_121339702_121339971	chr1	121339702	121339971	+	intron (NM_001271872, intron 4 of 9)	58069	100873165	SRGAP2-AS1	3.56709	6.00283e-09	TRUE	2.44596	0.00632353	TRUE	3.94323	1.08094e-12	TRUE	-1.12112	0.0146772	TRUE	0.376141	0.590018	FALSE	1.49726	5.56377e-05	TRUE
chr16_11901199_11901474	chr16	11901199	11901474	+	intron (NM_001130007, intron 1 of 14)	14632	2935	GSPT1	3.47962	4.41718e-05	TRUE	1.62371	0.348418	FALSE	3.95261	8.26088e-08	TRUE	-1.85592	0.00542962	TRUE	0.472986	0.599925	FALSE	2.3289	1.5627e-05	TRUE
chr18_69897721_69897997	chr18	69897721	69897997	+	intron (NM_001303619, intron 1 of 4)	49994	10666	CD226	3.47791	4.68072e-05	TRUE	1.45648	0.431598	FALSE	4.1126	1.01995e-08	TRUE	-2.02143	0.00277845	TRUE	0.634692	0.433912	FALSE	2.65612	6.23683e-07	TRUE
chr1_153732245_153732502	chr1	153732245	153732502	+	intron (NM_023015, intron 1 of 29).2	4306	65123	INTS3	3.5274	3.40423e-05	TRUE	2.14072	0.141658	FALSE	3.93895	1.361e-07	TRUE	-1.38668	0.0384758	TRUE	0.41155	0.669888	FALSE	1.79823	0.000567879	TRUE
chr9_114694951_114695120	chr9	114694951	114695120	+	Intergenic	-12946	100505478	TEX48	3.13246	3.68827e-05	TRUE	1.48763	0.308731	FALSE	3.93885	2.17844e-10	TRUE	-1.64483	0.00765481	TRUE	0.806393	0.234853	FALSE	2.45122	8.74881e-08	TRUE
chr16_28166917_28167177	chr16	28166917	28167177	+	intron (NM_001270940, intron 6 of 24)	44871	23214	XPO6	3.45528	9.27749e-07	TRUE	1.49025	0.305999	FALSE	3.93701	1.48218e-10	TRUE	-1.96502	0.000284608	TRUE	0.481733	0.503136	FALSE	2.44676	6.25614e-08	TRUE
chr6_26331401_26331602	chr6	26331401	26331602	+	Intergenic	-33658	11118	BTN3A2	3.87723	7.96705e-07	TRUE	2.67697	0.0280316	TRUE	3.93654	1.11014e-07	TRUE	-1.20026	0.0374424	TRUE	0.0593086	0.96193	FALSE	1.25957	0.0112313	TRUE
chr2_173239713_173240089	chr2	173239713	173240089	+	intron (NM_016653, intron 16 of 19)	42135	339751	MAP3K20-AS1	3.16177	1.21791e-07	TRUE	0.789518	0.600607	FALSE	3.93567	5.53857e-15	TRUE	-2.37225	1.79312e-06	TRUE	0.773908	0.161773	FALSE	3.14616	1.95294e-14	TRUE
chr9_135926861_135927174	chr9	135926861	135927174	+	Intergenic	-19858	157922	CAMSAP1	2.85471	0.00407328	TRUE	2.59963	0.0386848	TRUE	3.92868	1.97409e-07	TRUE	-0.255077	0.854179	FALSE	1.07397	0.205963	FALSE	1.32905	0.00995058	TRUE
chr16_27417238_27417629	chr16	27417238	27417629	+	intron (NM_181079, intron 2 of 9)	-9825	50615	IL21R	3.47722	6.53777e-05	TRUE	1.06154	0.628982	FALSE	4.89284	4.43583e-14	TRUE	-2.41569	0.000744578	TRUE	1.41562	0.0179348	TRUE	3.8313	5.87115e-14	TRUE
chr1_11063006_11063296	chr1	11063006	11063296	+	Intergenic	-3117	6723	SRM	3.55054	1.96521e-08	TRUE	2.98188	0.000116495	TRUE	3.92414	7.34385e-12	TRUE	-0.56866	0.34416	FALSE	0.373598	0.622733	FALSE	0.942258	0.0167561	FALSE
chr9_130029337_130029556	chr9	130029337	130029556	+	intron (NM_015033, intron 1 of 16)	13748	23048	FNBP1	3.13522	2.93279e-05	TRUE	2.47106	0.0161774	TRUE	3.92028	1.48699e-10	TRUE	-0.664156	0.355588	FALSE	0.785064	0.234853	FALSE	1.44922	0.000324942	TRUE
chr11_120657585_120658035	chr11	120657585	120658035	+	intron (NM_001282473, intron 2 of 17)	93374	2900	GRIK4	4.12168	1.38823e-10	TRUE	2.27723	0.0424283	TRUE	3.91942	9.2972e-10	TRUE	-1.84445	3.54122e-05	TRUE	-0.202267	0.823207	FALSE	1.64218	0.000205717	TRUE
chr8_89724118_89724250	chr8	89724118	89724250	+	intron (NR_125822, intron 3 of 4)	33527	101929709	LOC101929709	2.68241	0.00864981	TRUE	2.14031	0.138998	FALSE	3.9189	1.18578e-07	TRUE	-0.542097	0.660713	FALSE	1.23649	0.124728	FALSE	1.77859	0.00051776	TRUE
chr2_190695729_190696128	chr2	190695729	190696128	+	Intergenic	36770	4664	NAB1	3.46463	4.83827e-10	TRUE	1.02716	0.406777	FALSE	4.1679	4.1701e-17	TRUE	-2.43748	8.5416e-08	TRUE	0.70327	0.226554	FALSE	3.14075	5.46857e-15	TRUE
chr10_32970935_32971226	chr10	32970935	32971226	+	Intergenic	-12715	3688	ITGB1	3.46043	0.00297294	TRUE	2.32757	0.230594	FALSE	4.91278	8.91636e-10	TRUE	-1.13286	0.272141	FALSE	1.45235	0.0454015	TRUE	2.58521	5.6525e-07	TRUE
chr5_35058472_35058746	chr5	35058472	35058746	+	3' UTR (NM_001204314, exon 7 of 7)	-10474	64902	AGXT2	3.80107	1.02234e-06	TRUE	0.124924	0.970887	FALSE	3.91122	6.84896e-08	TRUE	-3.67614	1.27578e-07	TRUE	0.110157	0.918827	FALSE	3.7863	5.25785e-09	TRUE
chr18_35811997_35812222	chr18	35811997	35812222	+	Intergenic	92817	406963	MIR187	2.85099	0.00327425	TRUE	0.124821	0.970887	FALSE	3.91058	6.48343e-08	TRUE	-2.72617	0.00276735	TRUE	1.05958	0.173343	FALSE	3.78575	4.87104e-09	TRUE
chr1_223842893_223843069	chr1	223842893	223843069	+	intron (NM_001031685, intron 1 of 17)	2991	7159	TP53BP2	2.85095	0.00327425	TRUE	0.124816	0.970887	FALSE	3.9105	6.48343e-08	TRUE	-2.72613	0.00276735	TRUE	1.05955	0.173343	FALSE	3.78569	4.87104e-09	TRUE
chr17_55577413_55577612	chr17	55577413	55577612	+	Intergenic	145352	55273	TMEM100	3.15317	0.00117475	TRUE	1.90022	0.24393	FALSE	3.91032	1.28351e-06	TRUE	-1.25295	0.159331	FALSE	0.757151	0.455518	FALSE	2.0101	0.000857793	TRUE
chr16_89026131_89026510	chr16	89026131	89026510	+	Intergenic	-49224	863	CBFA2T3	3.45659	6.70571e-08	TRUE	2.4	0.00943033	TRUE	4.36743	3.62086e-16	TRUE	-1.05658	0.03786	TRUE	0.910841	0.0998103	FALSE	1.96743	4.84014e-08	TRUE
chr10_87931474_87931755	chr10	87931474	87931755	+	intron (NM_001304717, intron 5 of 9)	68176	5728	PTEN	3.45512	6.9211e-07	TRUE	0.735225	0.719607	FALSE	3.60105	2.46198e-08	TRUE	-2.71989	2.38817e-06	TRUE	0.145933	0.887018	FALSE	2.86583	6.2466e-08	TRUE
chr8_93751593_93751787	chr8	93751593	93751787	+	Intergenic	-3154	91147	TMEM67	3.4807	3.49181e-05	TRUE	0.810121	0.741581	FALSE	3.90948	8.76482e-08	TRUE	-2.67058	0.000132814	TRUE	0.428774	0.634411	FALSE	3.09936	1.64223e-07	TRUE
chr6_111769392_111769656	chr6	111769392	111769656	+	intron (NM_002037, intron 3 of 13)	-10393	2534	FYN	3.40721	4.32438e-09	TRUE	1.70772	0.0949135	FALSE	3.90921	3.95616e-14	TRUE	-1.69949	0.000117972	TRUE	0.501997	0.426942	FALSE	2.20149	5.69444e-09	TRUE
chr16_29825363_29825539	chr16	29825363	29825539	+	intron (NM_005115, intron 1 of 14)	5057	9961	MVP	3.07141	0.000952826	TRUE	3.06906	0.00412175	TRUE	3.90865	1.11604e-07	TRUE	-0.00235139	0.998875	FALSE	0.837245	0.308736	FALSE	0.839596	0.085371	FALSE
chr22_41342084_41342306	chr22	41342084	41342306	+	intron (NM_017590, intron 11 of 22)	-25138	7008	TEF	4.06131	4.55449e-08	TRUE	0.810496	0.741531	FALSE	3.90835	9.35252e-08	TRUE	-3.25081	6.44032e-08	TRUE	-0.152962	0.882986	FALSE	3.09785	1.78196e-07	TRUE
chr8_125342114_125342417	chr8	125342114	125342417	+	intron (NM_001349485, intron 4 of 6)	-88056	10221	TRIB1	3.45243	1.38317e-13	TRUE	1.28547	0.159526	FALSE	3.79868	1.13439e-18	TRUE	-2.16696	2.51726e-09	TRUE	0.346257	0.541539	FALSE	2.51321	4.35198e-14	TRUE
chr3_193964152_193964428	chr3	193964152	193964428	+	intron (NR_033944, intron 1 of 2)	29948	100128023	DPPA2P3	3.00685	0.00204439	TRUE	2.24612	0.116327	FALSE	3.90806	5.04335e-07	TRUE	-0.760725	0.459515	FALSE	0.901216	0.325766	FALSE	1.66194	0.00266865	TRUE
chr5_132019968_132020564	chr5	132019968	132020564	+	Intergenic	-8198	23305	ACSL6	3.44109	1.32219e-13	TRUE	2.04575	0.00311181	TRUE	3.4655	1.05357e-14	TRUE	-1.39534	4.3814e-05	TRUE	0.0244155	0.978941	FALSE	1.41976	1.10093e-05	TRUE
chr14_75876011_75876282	chr14	75876011	75876282	+	intron (NM_015072, intron 29 of 31)	105876	7043	TGFB3	2.27472	0.0433988	TRUE	1.6225	0.346807	FALSE	3.90768	1.05228e-07	TRUE	-0.652226	0.645179	FALSE	1.63295	0.0399234	TRUE	2.28518	1.96571e-05	TRUE
chr3_119508196_119508702	chr3	119508196	119508702	+	intron (NM_016589, intron 4 of 6)	9928	51300	TIMMDC1	3.43799	4.73119e-08	TRUE	1.50584	0.226001	FALSE	4.12011	1.93364e-14	TRUE	-1.93215	6.20132e-05	TRUE	0.682122	0.242274	FALSE	2.61427	5.37243e-11	TRUE
chr8_8390629_8390833	chr8	8390629	8390833	+	Intergenic	-8897	157285	PRAG1	3.34054	3.49742e-06	TRUE	0.521671	0.821908	FALSE	3.90039	2.79856e-10	TRUE	-2.81886	4.95094e-06	TRUE	0.559856	0.43313	FALSE	3.37872	9.27386e-11	TRUE
chr7_1103274_1103739	chr7	1103274	1103739	+	intron (NM_001134396, intron 2 of 4)	15458	2852	GPER1	3.41386	7.24159e-08	TRUE	1.75106	0.123591	FALSE	3.90011	3.35903e-12	TRUE	-1.6628	0.000562609	TRUE	0.486249	0.471133	FALSE	2.14905	1.00416e-07	TRUE
chr11_70324414_70324637	chr11	70324414	70324637	+	intron (NM_177423, intron 3 of 25)	40570	100313770	MIR548K	3.42979	6.24774e-05	TRUE	0.809986	0.742165	FALSE	3.6889	1.67169e-06	TRUE	-2.6198	0.000256364	TRUE	0.259119	0.818476	FALSE	2.87892	4.98333e-06	TRUE
chr14_73810753_73811138	chr14	73810753	73811138	+	Intergenic	19190	100506498	LINC02274	3.62888	1.15093e-05	TRUE	2.51974	0.0488051	TRUE	3.88638	2.14988e-07	TRUE	-1.10914	0.0889651	FALSE	0.257506	0.809894	FALSE	1.36664	0.00729734	TRUE
chr13_40973492_40973666	chr13	40973492	40973666	+	intron (NM_001145353, intron 1 of 7)	8703	1997	ELF1	3.42955	4.92557e-05	TRUE	0.810484	0.741156	FALSE	3.55562	4.86232e-06	TRUE	-2.61907	0.000193627	TRUE	0.12607	0.917495	FALSE	2.74514	1.65308e-05	TRUE
chr3_5022255_5022575	chr3	5022255	5022575	+	Intergenic	-42454	100507582	BHLHE40-AS1	2.98454	1.2911e-09	TRUE	2.11081	0.00119413	TRUE	3.88394	5.79019e-20	TRUE	-0.873729	0.0404514	FALSE	0.899405	0.0609729	FALSE	1.77313	7.6059e-09	TRUE
chr10_12777951_12778310	chr10	12777951	12778310	+	intron (NM_001351032, intron 7 of 11)	-52777	100313841	MIR548Q	3.42949	4.96191e-05	TRUE	-0.398462	0.907578	FALSE	4.38325	2.68831e-11	TRUE	-3.82795	3.03235e-06	TRUE	0.953755	0.13316	FALSE	4.78171	3.0642e-14	TRUE
chr1_200262633_200262848	chr1	200262633	200262848	+	Intergenic	111052	554279	LINC00862	3.31573	0.00017808	TRUE	1.45946	0.430505	FALSE	3.87944	2.21138e-07	TRUE	-1.85627	0.00975074	TRUE	0.563706	0.528559	FALSE	2.41998	1.61918e-05	TRUE
chr1_67332806_67333425	chr1	67332806	67333425	+	intron (NM_001258216, intron 7 of 13)	25751	3595	IL12RB2	3.42767	8.10252e-29	TRUE	0.506065	0.545191	FALSE	3.68445	1.17221e-36	TRUE	-2.9216	2.49069e-29	TRUE	0.256786	0.501213	FALSE	3.17839	3.56779e-38	TRUE
chr17_9977309_9977537	chr17	9977309	9977537	+	intron (NM_201432, intron 3 of 13)	-17974	8522	GAS7	2.59175	0.0120942	TRUE	0.810467	0.741156	FALSE	3.87526	1.04812e-07	TRUE	-1.78129	0.0675452	FALSE	1.28351	0.100444	FALSE	3.0648	1.99144e-07	TRUE
chrX_149837692_149837985	chrX	149837692	149837985	+	intron (NR_109813, intron 1 of 2)	12130	101241891	LINC00850	3.00103	0.001325	TRUE	0.507984	0.859262	FALSE	3.87525	1.04812e-07	TRUE	-2.49305	0.00282281	TRUE	0.874215	0.272321	FALSE	3.36726	4.59815e-08	TRUE
chr10_100174840_100175024	chr10	100174840	100175024	+	intron (NR_144756, intron 6 of 10)	11045	10613	ERLIN1	2.92795	0.00208761	TRUE	-0.398443	0.907578	FALSE	3.87525	1.04812e-07	TRUE	-3.32639	0.000402743	TRUE	0.947299	0.231973	FALSE	4.27369	1.23905e-09	TRUE
chr5_109788703_109788898	chr5	109788703	109788898	+	intron (NM_002372, intron 10 of 21)	-94382	100289673	LINC01848	3.31955	0.000128552	TRUE	-1.22781	0.699581	FALSE	3.87523	1.04812e-07	TRUE	-4.54736	1.42577e-06	TRUE	0.555679	0.508413	FALSE	5.10304	1.12384e-10	TRUE
chr8_100382402_100382754	chr8	100382402	100382754	+	promoter-TSS (NR_039681)	-185	100616451	MIR4471	3.42674	5.88391e-12	TRUE	1.69687	0.036984	TRUE	3.64344	1.16105e-14	TRUE	-1.72987	8.62752e-06	TRUE	0.216694	0.78411	FALSE	1.94657	6.54581e-08	TRUE
chr3_30347667_30347918	chr3	30347667	30347918	+	Intergenic	-171076	101928015	LINC01985	2.52993	0.00352679	TRUE	1.80347	0.163264	FALSE	3.87435	4.91562e-10	TRUE	-0.726463	0.442442	FALSE	1.34442	0.0399234	TRUE	2.07088	2.72662e-06	TRUE
chr10_3848867_3849020	chr10	3848867	3849020	+	Intergenic	14993	105376365	LOC105376365	3.13734	0.000568943	TRUE	1.77129	0.278925	FALSE	3.87338	1.36489e-07	TRUE	-1.36605	0.0758719	FALSE	0.736044	0.376752	FALSE	2.10209	6.22915e-05	TRUE
chr20_17992330_17992635	chr20	17992330	17992635	+	Intergenic	-23491	27131	SNX5	2.66019	0.00148549	TRUE	2.41094	0.0215797	TRUE	3.87265	3.64249e-10	TRUE	-0.249244	0.830027	FALSE	1.21246	0.0624947	FALSE	1.4617	0.000374265	TRUE
chrX_41703516_41704013	chrX	41703516	41704013	+	intron (NM_001126055, intron 5 of 24)	14791	2857	GPR34	3.42069	1.33963e-07	TRUE	2.35178	0.0126619	TRUE	3.64401	1.34056e-09	TRUE	-1.06891	0.0404063	TRUE	0.223318	0.814572	FALSE	1.29223	0.0026616	TRUE
chr11_118216569_118216771	chr11	118216569	118216771	+	intron (NM_001098526, intron 1 of 9)	-3311	120425	JAML	2.84837	0.00382027	TRUE	3.06928	0.0044641	TRUE	3.86994	2.40964e-07	TRUE	0.220906	0.863729	FALSE	1.02157	0.221059	FALSE	0.800663	0.11342	FALSE
chr1_184941869_184942060	chr1	184941869	184942060	+	intron (NM_052966, intron 1 of 13)	32622	116496	FAM129A	3.13567	0.000619232	TRUE	2.1395	0.138164	FALSE	3.86881	1.85006e-07	TRUE	-0.996173	0.228695	FALSE	0.733133	0.388262	FALSE	1.72931	0.000765161	TRUE
chr3_177315040_177315241	chr3	177315040	177315241	+	intron (NR_047465, intron 1 of 1)	20698	100820709	LINC00501	3.41981	1.62097e-06	TRUE	-0.0308091	0.992151	FALSE	3.4481	3.54452e-07	TRUE	-3.45062	1.43127e-07	TRUE	0.0282899	0.982258	FALSE	3.47891	2.41315e-08	TRUE
chr6_111338833_111339122	chr6	111338833	111339122	+	intron (NM_001286431, intron 24 of 34)	79698	91749	MFSD4B	3.41854	0.000122046	TRUE	1.46058	0.435915	FALSE	3.94443	2.84384e-07	TRUE	-1.95796	0.00681195	TRUE	0.52589	0.587979	FALSE	2.48385	2.10313e-05	TRUE
chr2_224925704_224926022	chr2	224925704	224926022	+	intron (NM_014689, intron 2 of 55)	21202	55619	DOCK10	2.74581	0.000199896	TRUE	1.59304	0.189959	FALSE	3.85935	3.18032e-11	TRUE	-1.15278	0.0856107	FALSE	1.11354	0.0812633	FALSE	2.26632	1.65261e-07	TRUE
chr12_95700285_95700722	chr12	95700285	95700722	+	intron (NM_021229, intron 5 of 9)	51248	100132594	PGAM1P5	3.41782	4.70101e-09	TRUE	1.19785	0.337032	FALSE	4.20094	4.7513e-17	TRUE	-2.21998	1.66091e-06	TRUE	0.783118	0.151679	FALSE	3.00309	1.36618e-14	TRUE
chr14_75159261_75159497	chr14	75159261	75159497	+	intron (NM_006827, intron 1 of 4)	17267	10972	TMED10	3.22883	2.50251e-05	TRUE	0.925336	0.624207	FALSE	3.85017	4.7655e-09	TRUE	-2.30349	0.000338678	TRUE	0.62134	0.44096	FALSE	2.92483	3.9579e-08	TRUE
chr4_77581829_77582014	chr4	77581829	77582014	+	intron (NM_006419, intron 1 of 4)	70168	10563	CXCL13	3.14861	6.78151e-05	TRUE	2.34987	0.0355412	TRUE	3.84814	9.25287e-09	TRUE	-0.798735	0.296878	FALSE	0.699533	0.395432	FALSE	1.49827	0.00169155	TRUE
chr12_111505586_111505939	chr12	111505586	111505939	+	intron (NM_001310123, intron 12 of 21)	70900	10019	SH2B3	3.41765	1.24104e-06	TRUE	-0.413243	0.884725	FALSE	3.3068	1.49676e-06	TRUE	-3.8309	1.94633e-08	TRUE	-0.11085	0.920216	FALSE	3.72005	2.72154e-08	TRUE
chr19_7186274_7186752	chr19	7186274	7186752	+	intron (NM_001079817, intron 2 of 20)	107789	3643	INSR	3.41503	7.78407e-10	TRUE	-0.431224	0.820794	FALSE	2.7978	1.31011e-06	TRUE	-3.84625	1.65237e-12	TRUE	-0.617226	0.409292	FALSE	3.22902	1.56836e-08	TRUE
chr8_140162065_140162248	chr8	140162065	140162248	+	intron (NM_001321646, intron 16 of 21)	-61621	359809	PEG13	3.37781	0.000101205	TRUE	2.60205	0.0357798	TRUE	3.8452	2.79441e-07	TRUE	-0.775764	0.329001	FALSE	0.467383	0.617963	FALSE	1.24315	0.013982	TRUE
chr8_8301182_8301545	chr8	8301182	8301545	+	Intergenic	72793	286042	FAM86B3P	3.49124	1.16809e-08	TRUE	0.342617	0.878496	FALSE	3.84485	3.18508e-12	TRUE	-3.14862	3.35067e-09	TRUE	0.353619	0.613905	FALSE	3.50224	2.18795e-13	TRUE
chr10_98404603_98404995	chr10	98404603	98404995	+	intron (NM_032709, intron 4 of 15)	-9492	100302133	MIR1287	3.42452	7.6083e-05	TRUE	1.05988	0.627255	FALSE	3.84211	3.79907e-07	TRUE	-2.36464	0.000852831	TRUE	0.417586	0.671439	FALSE	2.78222	3.25454e-06	TRUE
chr21_33384907_33385036	chr21	33384907	33385036	+	Intergenic	-17925	3460	IFNGR2	3.41499	2.68527e-06	TRUE	1.36661	0.377446	FALSE	3.58974	1.03649e-07	TRUE	-2.04838	0.000364338	TRUE	0.174751	0.872406	FALSE	2.22313	1.82592e-05	TRUE
chr16_12750163_12750528	chr16	12750163	12750528	+	intron (NM_018340, intron 2 of 3)	30024	100616195	MIR4718	3.06286	4.62484e-06	TRUE	0.84208	0.610854	FALSE	3.84106	3.96301e-12	TRUE	-2.22078	6.77307e-05	TRUE	0.778195	0.201197	FALSE	2.99898	1.95008e-11	TRUE
chr4_172750928_172751309	chr4	172750928	172751309	+	intron (NM_001034845, intron 5 of 12)	-24240	101928314	LOC101928314	3.86941	1.33082e-05	TRUE	0.502109	0.865266	FALSE	3.84102	6.72491e-06	TRUE	-3.3673	1.57385e-05	TRUE	-0.0283889	0.986246	FALSE	3.33891	8.16791e-06	TRUE
chr1_172658870_172659232	chr1	172658870	172659232	+	promoter-TSS (NM_001302746)	43	356	FASLG	3.4113	5.4595e-12	TRUE	1.84599	0.0210511	TRUE	3.10149	6.74459e-10	TRUE	-1.56532	2.32776e-05	TRUE	-0.30981	0.65366	FALSE	1.25551	0.000971274	TRUE
chr12_121912385_121912597	chr12	121912385	121912597	+	intron (NM_002813, intron 4 of 5)	-6066	144406	WDR66	3.95615	1.66039e-07	TRUE	0.810294	0.741373	FALSE	3.83996	2.01642e-07	TRUE	-3.14586	2.88002e-07	TRUE	-0.116193	0.913454	FALSE	3.02966	4.38271e-07	TRUE
chr9_35924317_35924544	chr9	35924317	35924544	+	Intergenic	14947	158376	SPAAR	2.76968	0.00511494	TRUE	0.810361	0.741228	FALSE	3.83903	1.75484e-07	TRUE	-1.95932	0.0293986	TRUE	1.06935	0.183983	FALSE	3.02867	3.69485e-07	TRUE
chr5_56329805_56329948	chr5	56329805	56329948	+	Intergenic	-96517	79722	ANKRD55	3.26125	0.000206176	TRUE	1.90458	0.22012	FALSE	3.83896	1.6949e-07	TRUE	-1.35667	0.0583559	FALSE	0.577707	0.49802	FALSE	1.93438	0.000174302	TRUE
chr12_810708_810994	chr12	810708	810994	+	intron (NM_213655, intron 1 of 27)	57928	65125	WNK1	3.53176	1.85875e-05	TRUE	1.45885	0.426226	FALSE	3.83892	1.6949e-07	TRUE	-2.07291	0.00117501	TRUE	0.307157	0.753864	FALSE	2.38007	1.21336e-05	TRUE
chr3_28841000_28841426	chr3	28841000	28841426	+	Intergenic	265935	645206	LINC00693	3.40874	3.84625e-06	TRUE	1.80198	0.173125	FALSE	4.72741	1.51615e-16	TRUE	-1.60677	0.00557335	TRUE	1.31867	0.0146699	TRUE	2.92544	1.043e-12	TRUE
chr11_10490093_10490448	chr11	10490093	10490448	+	intron (NM_001025390, intron 6 of 14)	18056	100616263	MIR4485	3.40673	1.05505e-08	TRUE	0.21716	0.919847	FALSE	3.86276	7.03382e-13	TRUE	-3.18957	2.09734e-09	TRUE	0.45603	0.51052	FALSE	3.6456	2.95491e-14	TRUE
chr10_35340034_35340252	chr10	35340034	35340252	+	intron (NM_001282852, intron 1 of 8)	3269	219771	CCNY	3.49384	1.46951e-08	TRUE	2.02025	0.0484039	TRUE	3.83141	6.88594e-12	TRUE	-1.47359	0.00123024	TRUE	0.337569	0.64357	FALSE	1.81116	3.16826e-06	TRUE
chr8_53524523_53524907	chr8	53524523	53524907	+	promoter-TSS (NR_149032)	-750	100507516	LOC100507516	3.39711	1.15198e-08	TRUE	-1.11204	0.578434	FALSE	3.46032	1.20162e-09	TRUE	-4.50915	1.29561e-12	TRUE	0.0632181	0.954132	FALSE	4.57237	6.13191e-14	TRUE
chr6_155050360_155050725	chr6	155050360	155050725	+	Intergenic	-39747	26230	TIAM2	3.39687	8.23132e-06	TRUE	1.97162	0.122235	FALSE	3.33559	5.38745e-06	TRUE	-1.42525	0.0213726	TRUE	-0.0612805	0.965087	FALSE	1.36397	0.0158246	TRUE
chr5_62285405_62285879	chr5	62285405	62285879	+	Intergenic	-20520	3796	KIF2A	3.39306	2.18509e-07	TRUE	3.50597	2.58876e-07	TRUE	3.99751	2.84732e-12	TRUE	0.112916	0.907897	FALSE	0.604453	0.378101	FALSE	0.491537	0.236337	FALSE
chr2_177547109_177547493	chr2	177547109	177547493	+	Intergenic	5495	150737	TTC30B	3.09811	3.06772e-06	TRUE	1.95557	0.061143	FALSE	3.82409	5.83352e-12	TRUE	-1.14254	0.0350203	TRUE	0.725984	0.239074	FALSE	1.86853	1.42979e-06	TRUE
chr2_8408786_8409396	chr2	8408786	8409396	+	Intergenic	-80672	339789	LINC00299	3.39196	1.34364e-18	TRUE	1.1988	0.104904	FALSE	3.80886	2.31521e-27	TRUE	-2.19316	2.61991e-13	TRUE	0.416894	0.325766	FALSE	2.61006	1.6951e-21	TRUE
chr2_110910397_110910723	chr2	110910397	110910723	+	intron (NM_001142807, intron 11 of 17)	177987	55289	ACOXL	3.34135	3.22305e-06	TRUE	2.79025	0.00264151	TRUE	3.8191	9.63465e-10	TRUE	-0.551102	0.429444	FALSE	0.477752	0.520201	FALSE	1.02885	0.0126966	TRUE
chr22_30335288_30335590	chr22	30335288	30335590	+	intron (NM_005877, intron 15 of 15)	-8473	83874	TBC1D10A	3.22081	1.20528e-05	TRUE	1.60048	0.250481	FALSE	3.81433	9.61642e-10	TRUE	-1.62034	0.00531082	TRUE	0.593515	0.409968	FALSE	2.21385	9.78537e-07	TRUE
chr5_111254664_111254985	chr5	111254664	111254985	+	intron (NM_001744, intron 1 of 10)	30282	814	CAMK4	3.12695	6.83719e-08	TRUE	1.11245	0.347284	FALSE	3.81229	6.1098e-14	TRUE	-2.01451	2.31501e-05	TRUE	0.68534	0.264084	FALSE	2.69985	3.18416e-11	TRUE
chr4_76563499_76563932	chr4	76563499	76563932	+	intron (NM_020859, intron 2 of 10)	-9853	100616299	MIR4450	3.26702	3.68085e-07	TRUE	0.97542	0.527964	FALSE	3.81159	8.31966e-12	TRUE	-2.2916	1.11586e-05	TRUE	0.544577	0.40689	FALSE	2.83617	1.41036e-10	TRUE
chr22_20624136_20624670	chr22	20624136	20624670	+	Intergenic	-65152	266697	POM121L4P	3.39111	4.27125e-12	TRUE	1.11546	0.267927	FALSE	3.75773	1.26679e-16	TRUE	-2.27565	8.43949e-09	TRUE	0.366617	0.560583	FALSE	2.64227	3.76227e-13	TRUE
chr1_183598559_183598780	chr1	183598559	183598780	+	Intergenic	-7748	4688	NCF2	3.39103	1.21032e-07	TRUE	1.31493	0.327258	FALSE	3.57241	1.93565e-09	TRUE	-2.07609	3.71481e-05	TRUE	0.181379	0.851776	FALSE	2.25747	8.03885e-07	TRUE
chr19_6592566_6592781	chr19	6592566	6592781	+	Intergenic	-1521	970	CD70	3.21336	1.94283e-05	TRUE	1.48601	0.312083	FALSE	3.80593	3.18603e-09	TRUE	-1.72735	0.00432797	TRUE	0.592569	0.442052	FALSE	2.31992	1.29404e-06	TRUE
chr3_10228672_10228917	chr3	10228672	10228917	+	intron (NM_001570, intron 10 of 12)	-19699	9797	TATDN2	3.20193	0.000400905	TRUE	2.13862	0.139012	FALSE	3.80542	4.62668e-07	TRUE	-1.06331	0.180095	FALSE	0.603493	0.502631	FALSE	1.6668	0.001578	TRUE
chr6_8065557_8065755	chr6	8065557	8065755	+	intron (NR_037618, intron 3 of 6)	-1242	63915	BLOC1S5	3.38547	6.00987e-06	TRUE	2.47086	0.021179	TRUE	3.7986	1.35023e-08	TRUE	-0.914612	0.161874	FALSE	0.413132	0.650068	FALSE	1.32774	0.00502163	TRUE
chr5_54804212_54804574	chr5	54804212	54804574	+	Intergenic	-60135	102467080	LOC102467080	3.38477	3.30305e-06	TRUE	2.18394	0.0433659	TRUE	3.54646	2.06535e-07	TRUE	-1.20083	0.0621158	FALSE	0.161692	0.896821	FALSE	1.36252	0.0114681	TRUE
chr9_4944390_4944665	chr9	4944390	4944665	+	Intergenic	-40559	3717	JAK2	3.42955	4.92557e-05	TRUE	2.34221	0.0796179	FALSE	3.80175	2.76057e-07	TRUE	-1.08734	0.111251	FALSE	0.372199	0.695905	FALSE	1.45954	0.00356305	TRUE
chr13_21686789_21687038	chr13	21686789	21687038	+	intron (NM_002010, intron 2 of 2)	15837	2254	FGF9	3.53178	1.85875e-05	TRUE	1.06038	0.624029	FALSE	3.80171	2.76057e-07	TRUE	-2.47139	0.000191692	TRUE	0.269935	0.791564	FALSE	2.74133	2.2075e-06	TRUE
chr1_176177763_176178176	chr1	176177763	176178176	+	intron (NM_001001740, intron 2 of 18)	29275	64326	COP1	3.38311	2.84045e-12	TRUE	0.815412	0.459081	FALSE	3.39923	3.45544e-13	TRUE	-2.5677	3.37204e-10	TRUE	0.0161203	0.987075	FALSE	2.58382	4.54634e-11	TRUE
chr7_66869737_66870063	chr7	66869737	66870063	+	intron (NR_135738, intron 4 of 6)	22450	101929580	GTF2IP23	3.38294	1.76047e-07	TRUE	1.58442	0.191547	FALSE	3.58947	2.32983e-09	TRUE	-1.79853	0.00034179	TRUE	0.206529	0.826881	FALSE	2.00505	8.62763e-06	TRUE
chr11_6856987_6857189	chr11	6856987	6857189	+	Intergenic	11405	144124	OR10A5	3.75948	1.60671e-06	TRUE	-0.39846	0.907578	FALSE	3.80164	2.76057e-07	TRUE	-4.15794	3.65715e-08	TRUE	0.0421617	0.973418	FALSE	4.2001	4.27063e-09	TRUE
chr1_154445081_154445370	chr1	154445081	154445370	+	intron (NM_181359, intron 6 of 8)	-38661	101928101	IL6R-AS1	3.3818	2.18815e-06	TRUE	0.734213	0.720709	FALSE	3.83889	7.89096e-10	TRUE	-2.64759	8.70059e-06	TRUE	0.457086	0.544085	FALSE	3.10467	1.24449e-09	TRUE
chr3_71081513_71081606	chr3	71081513	71081606	+	intron (NM_001349341, intron 7 of 20)	-16636	27086	FOXP1	3.37619	8.81608e-05	TRUE	2.51975	0.0460785	TRUE	3.8001	3.50101e-07	TRUE	-0.856446	0.255608	FALSE	0.423906	0.65366	FALSE	1.28035	0.0109051	TRUE
chr19_7690715_7691120	chr19	7690715	7691120	+	intron (NM_001220500, intron 8 of 10)	8562	2208	FCER2	3.50241	1.15484e-11	TRUE	0.538256	0.734862	FALSE	3.7995	1.45379e-15	TRUE	-2.96415	1.60149e-11	TRUE	0.297087	0.645511	FALSE	3.26124	6.59411e-16	TRUE
chr5_95615113_95615396	chr5	95615113	95615396	+	Intergenic	-4824	285601	GPR150	3.3811	2.12532e-06	TRUE	1.23207	0.445365	FALSE	3.23126	3.87326e-06	TRUE	-2.14903	0.000135663	TRUE	-0.149837	0.892417	FALSE	1.99919	0.000284747	TRUE
chr9_96241389_96241670	chr9	96241389	96241670	+	intron (NM_000197, intron 9 of 10)	-4934	105376162	HSD17B3-AS1	3.37929	2.31841e-06	TRUE	0.735411	0.720325	FALSE	3.76021	3.14634e-09	TRUE	-2.64388	9.41165e-06	TRUE	0.380921	0.641429	FALSE	3.0248	6.1986e-09	TRUE
chr14_60220210_60220414	chr14	60220210	60220414	+	Intergenic	-25440	5494	PPM1A	3.91955	3.05437e-07	TRUE	1.62295	0.346255	FALSE	3.7985	3.88085e-07	TRUE	-2.29661	4.60803e-05	TRUE	-0.121052	0.911999	FALSE	2.17555	7.09284e-05	TRUE
chr12_103279565_103279784	chr12	103279565	103279784	+	intron (NR_103526, intron 4 of 10)	127832	101929058	LOC101929058	3.06438	0.00113585	TRUE	0.810557	0.742839	FALSE	3.79824	7.10891e-07	TRUE	-2.25382	0.0061078	TRUE	0.733862	0.421688	FALSE	2.98768	1.90863e-06	TRUE
chr4_176309036_176309433	chr4	176309036	176309433	+	Intergenic	-10705	60559	SPCS3	2.82858	0.000700487	TRUE	1.79883	0.174682	FALSE	3.79792	1.02036e-08	TRUE	-1.02975	0.192234	FALSE	0.96934	0.206119	FALSE	1.99909	3.83874e-05	TRUE
chr3_141371894_141372161	chr3	141371894	141372161	+	intron (NM_001080412, intron 3 of 7)	-14419	253461	ZBTB38	3.37913	2.25168e-06	TRUE	1.60111	0.251251	FALSE	3.61995	2.57959e-08	TRUE	-1.77802	0.00123632	TRUE	0.240816	0.799921	FALSE	2.01883	2.4142e-05	TRUE
chr16_53535032_53535288	chr16	53535032	53535288	+	Intergenic	-31856	64400	AKTIP	2.58641	0.00342998	TRUE	2.27858	0.0452508	TRUE	3.79543	1.63544e-08	TRUE	-0.307835	0.804912	FALSE	1.20901	0.113164	FALSE	1.51685	0.00159233	TRUE
chr6_135226616_135226902	chr6	135226616	135226902	+	Intergenic	-12401	693126	MIR548A2	3.02235	8.27312e-06	TRUE	1.95538	0.0623848	FALSE	3.79479	1.69156e-11	TRUE	-1.06696	0.0625753	FALSE	0.772438	0.220054	FALSE	1.8394	3.437e-06	TRUE
chr3_65964251_65964586	chr3	65964251	65964586	+	intron (NM_001033057, intron 1 of 22)	-9860	151877	MAGI1-IT1	2.83718	0.000387497	TRUE	2.69205	0.004689	TRUE	3.7947	1.01931e-09	TRUE	-0.145129	0.903527	FALSE	0.957522	0.156286	FALSE	1.10265	0.00701086	TRUE
chr12_53558738_53559027	chr12	53558738	53559027	+	intron (NM_001130060, intron 2 of 11)	44898	100652999	LOC100652999	3.37898	2.04496e-06	TRUE	1.48825	0.305638	FALSE	3.40595	4.43607e-07	TRUE	-1.89073	0.000586934	TRUE	0.0269751	0.982674	FALSE	1.9177	0.000164159	TRUE
chr19_51219461_51219659	chr19	51219461	51219659	+	Intergenic	-5519	945	CD33	2.76749	0.00570925	TRUE	0.507903	0.859675	FALSE	3.79378	5.48998e-07	TRUE	-2.25959	0.014766	TRUE	1.02629	0.229286	FALSE	3.28588	3.45832e-07	TRUE
chr5_172229893_172230208	chr5	172229893	172230208	+	intron (NM_152277, intron 2 of 2)	35878	285588	EFCAB9	3.34225	2.15877e-06	TRUE	1.08482	0.52586	FALSE	3.79377	6.17609e-10	TRUE	-2.25743	5.84793e-05	TRUE	0.451522	0.528775	FALSE	2.70895	1.09047e-08	TRUE
chr17_16229509_16229828	chr17	16229509	16229828	+	intron (NM_004278, intron 1 of 6)	12473	9487	PIGL	3.17843	1.48377e-05	TRUE	1.89531	0.126629	FALSE	3.79305	7.38045e-10	TRUE	-1.28312	0.0284904	TRUE	0.614618	0.376254	FALSE	1.89774	9.08602e-06	TRUE
chr1_246962496_246962688	chr1	246962496	246962688	+	intron (NM_001204221, intron 5 of 5)	-30614	25909	AHCTF1	3.00148	0.0015624	TRUE	2.34162	0.0835294	FALSE	3.79244	5.71013e-07	TRUE	-0.65986	0.512211	FALSE	0.790958	0.371766	FALSE	1.45082	0.00558812	TRUE
chr2_233261930_233262202	chr2	233261930	233262202	+	intron (NM_198890, intron 2 of 13)	10495	55054	ATG16L1	3.52627	4.04404e-05	TRUE	1.77266	0.285364	FALSE	3.78845	1.06417e-06	TRUE	-1.75362	0.00938757	TRUE	0.262178	0.820051	FALSE	2.01579	0.000414162	TRUE
chr21_38780960_38781224	chr21	38780960	38781224	+	Intergenic	-7615	400866	LINC00114	3.52563	3.59465e-07	TRUE	1.36664	0.371347	FALSE	3.78815	1.82065e-09	TRUE	-2.159	5.18009e-05	TRUE	0.262515	0.765235	FALSE	2.42151	2.98932e-07	TRUE
chr8_60622223_60622563	chr8	60622223	60622563	+	3' UTR (NM_001242644, exon 7 of 7)	-56372	55636	CHD7	3.30401	3.03204e-08	TRUE	0.0349552	0.988379	FALSE	3.78672	1.10226e-12	TRUE	-3.26906	2.07924e-09	TRUE	0.482713	0.471083	FALSE	3.75177	1.11228e-14	TRUE
chr16_10775205_10775671	chr16	10775205	10775671	+	5' UTR (NM_001318873, exon 3 of 8)	31569	4682	NUBP1	3.162	2.23158e-08	TRUE	2.01395	0.016225	TRUE	3.78599	2.45392e-14	TRUE	-1.14805	0.0117893	TRUE	0.623996	0.295845	FALSE	1.77204	6.89227e-07	TRUE
chr11_72974577_72974782	chr11	72974577	72974782	+	intron (NM_014824, intron 8 of 19)	94759	NA		2.4945	0.020714	TRUE	2.43501	0.0657735	FALSE	3.77867	1.01274e-06	TRUE	-0.0594903	0.974575	FALSE	1.28418	0.148422	FALSE	1.34367	0.0127886	TRUE
chr13_77430479_77430631	chr13	77430479	77430631	+	Intergenic	-103513	23077	MYCBP2	3.37812	2.12353e-06	TRUE	1.8037	0.162025	FALSE	3.65378	1.40971e-08	TRUE	-1.57442	0.00385529	TRUE	0.275664	0.761682	FALSE	1.85008	6.06004e-05	TRUE
chr3_68088275_68088534	chr3	68088275	68088534	+	intron (NM_213609, intron 2 of 4)	84188	407738	FAM19A1	3.37558	7.97314e-05	TRUE	1.62319	0.343887	FALSE	3.55552	4.86232e-06	TRUE	-1.75239	0.00931479	TRUE	0.179936	0.881814	FALSE	1.93233	0.000820378	TRUE
chr4_67817972_67818315	chr4	67817972	67818315	+	Intergenic	-62057	2798	GNRHR	3.34194	8.29569e-06	TRUE	-0.0287377	0.992493	FALSE	3.77422	1.55671e-08	TRUE	-3.37068	1.24967e-06	TRUE	0.432278	0.629344	FALSE	3.80296	6.47895e-10	TRUE
chr7_134636008_134636469	chr7	134636008	134636469	+	Intergenic	-10541	669	BPGM	3.37481	8.28658e-10	TRUE	0.533151	0.741156	FALSE	3.4126	9.52372e-11	TRUE	-2.84165	1.87649e-09	TRUE	0.0377977	0.972016	FALSE	2.87945	1.88165e-10	TRUE
chr16_66984735_66985327	chr16	66984735	66985327	+	Intergenic	-3558	283848	CES4A	1.8502	0.0795704	FALSE	4.7262	2.53516e-14	TRUE	3.77003	1.83512e-08	TRUE	2.876	8.21714e-11	TRUE	1.91982	0.0125361	TRUE	-0.956173	0.00930792	FALSE
chr9_120508062_120508515	chr9	120508062	120508515	+	intron (NM_001011649, intron 12 of 36)	71882	55755	CDK5RAP2	4.40649	3.47449e-09	TRUE	1.2726	0.528528	FALSE	3.76904	2.35583e-06	TRUE	-3.13389	5.42627e-08	TRUE	-0.637449	0.437416	FALSE	2.49644	6.78695e-05	TRUE
chr3_36677485_36677688	chr3	36677485	36677688	+	Intergenic	62275	85443	DCLK3	2.5909	0.0128029	TRUE	2.95017	0.00771968	TRUE	3.76802	6.30065e-07	TRUE	0.359266	0.767191	FALSE	1.17713	0.166667	FALSE	0.817859	0.111097	FALSE
chr1_199941399_199941630	chr1	199941399	199941630	+	Intergenic	-86088	2494	NR5A2	2.89113	0.000216581	TRUE	0.272067	0.917326	FALSE	3.76731	8.98569e-10	TRUE	-2.61907	0.000193627	TRUE	0.876179	0.185718	FALSE	3.49525	7.01206e-11	TRUE
chr1_17023191_17023496	chr1	17023191	17023496	+	intron (NM_003000, intron 6 of 7)	-11371	23400	ATP13A2	3.95621	1.70124e-07	TRUE	2.24451	0.105342	FALSE	3.76546	5.3111e-07	TRUE	-1.71171	0.00113873	TRUE	-0.190753	0.854452	FALSE	1.52096	0.00328379	TRUE
chr7_148926778_148927028	chr7	148926778	148927028	+	Intergenic	-14585	6090	RNY5	3.37282	0.000109843	TRUE	-0.397541	0.90798	FALSE	4.00995	3.67812e-08	TRUE	-3.77036	8.91825e-06	TRUE	0.637129	0.445167	FALSE	4.40749	3.63207e-10	TRUE
chr5_74294221_74294747	chr5	74294221	74294747	+	Intergenic	13841	102503429	LINC01335	3.37194	1.76695e-08	TRUE	2.22717	0.0106678	TRUE	3.50979	4.95052e-10	TRUE	-1.14477	0.016295	TRUE	0.137847	0.890117	FALSE	1.28262	0.00194677	TRUE
chr1_66380950_66381074	chr1	66380950	66381074	+	Intergenic	26634	5142	PDE4B	2.27552	0.0419684	TRUE	2.3422	0.0796179	FALSE	3.76352	4.48443e-07	TRUE	0.0666835	0.972141	FALSE	1.488	0.0692961	FALSE	1.42132	0.00507516	TRUE
chr20_51480563_51481117	chr20	51480563	51481117	+	intron (NM_173091, intron 3 of 9)	-27863	100422889	MIR3194	3.35346	4.78422e-12	TRUE	0.930107	0.391365	FALSE	4.02369	1.13283e-20	TRUE	-2.42335	1.31936e-09	TRUE	0.670228	0.178701	FALSE	3.09358	1.47591e-18	TRUE
chr3_196270515_196270748	chr3	196270515	196270748	+	intron (NM_001312673, intron 1 of 8)	17121	5130	PCYT1A	3.13697	0.000529479	TRUE	-1.22783	0.699581	FALSE	3.76339	4.48802e-07	TRUE	-4.3648	9.91163e-06	TRUE	0.626419	0.471753	FALSE	4.99122	7.50297e-10	TRUE
chr2_232027021_232027284	chr2	232027021	232027284	+	intron (NM_152383, intron 4 of 20)	65569	129563	DIS3L2	2.82031	1.89673e-05	TRUE	1.89283	0.0513904	FALSE	3.76111	5.15215e-12	TRUE	-0.927484	0.129625	FALSE	0.940796	0.133822	FALSE	1.86828	2.78599e-06	TRUE
chr10_44966000_44966137	chr10	44966000	44966137	+	intron (NM_032023, intron 1 of 10)	6297	83937	RASSF4	4.05675	1.14205e-07	TRUE	3.32687	0.000905159	TRUE	3.76083	1.16843e-06	TRUE	-0.729872	0.235728	FALSE	-0.295917	0.766265	FALSE	0.433955	0.440075	FALSE
chr6_157831854_157832195	chr6	157831854	157832195	+	intron (NM_016224, intron 1 of 17)	8853	51429	SNX9	3.34944	1.52786e-09	TRUE	0.749263	0.595309	FALSE	3.24138	2.48828e-09	TRUE	-2.60017	2.1199e-08	TRUE	-0.108053	0.911108	FALSE	2.49212	4.40793e-08	TRUE
chr4_98601698_98602024	chr4	98601698	98602024	+	intron (NM_005723, intron 1 of 7)	56800	10098	TSPAN5	3.3426	2.88158e-06	TRUE	0.920655	0.620336	FALSE	3.94617	7.35788e-11	TRUE	-2.42195	3.24825e-05	TRUE	0.603569	0.372619	FALSE	3.02552	3.16953e-10	TRUE
chr6_21164933_21165252	chr6	21164933	21165252	+	intron (NM_017774, intron 13 of 15)	346800	100874531	LINC00581	3.80107	1.29334e-06	TRUE	1.77087	0.27992	FALSE	3.75951	6.32402e-07	TRUE	-2.0302	0.000439805	TRUE	-0.0415615	0.974781	FALSE	1.98864	0.00026312	TRUE
chr6_107726630_107726909	chr6	107726630	107726909	+	intron (NM_198081, intron 5 of 7)	5627	256380	SCML4	3.33925	1.17791e-09	TRUE	0.967672	0.415248	FALSE	3.72122	2.80934e-13	TRUE	-2.37158	2.23818e-07	TRUE	0.381961	0.613056	FALSE	2.75354	6.50263e-11	TRUE
chr2_230805398_230805688	chr2	230805398	230805688	+	intron (NM_001130850, intron 5 of 8)	-59055	81618	ITM2C	3.33456	5.56864e-06	TRUE	1.36589	0.376524	FALSE	3.15017	1.37273e-05	TRUE	-1.96867	0.000736324	TRUE	-0.184394	0.872727	FALSE	1.78428	0.00185467	TRUE
chr6_125804361_125804608	chr6	125804361	125804608	+	intron (NR_126386, intron 1 of 2)	13721	135112	NCOA7	3.33426	7.90743e-09	TRUE	0.78755	0.601777	FALSE	3.63249	6.38804e-12	TRUE	-2.54671	9.1394e-08	TRUE	0.298235	0.687779	FALSE	2.84494	4.85686e-11	TRUE
chr13_45206369_45206689	chr13	45206369	45206689	+	intron (NM_004128, intron 4 of 7)	-5489	386618	KCTD4	2.27177	0.00424963	TRUE	2.0208	0.0455733	TRUE	3.74657	1.31186e-11	TRUE	-0.250966	0.828667	FALSE	1.4748	0.0117388	TRUE	1.72577	5.984e-06	TRUE
chr6_111837718_111838170	chr6	111837718	111838170	+	intron (NM_002037, intron 2 of 13)	35508	2534	FYN	3.33021	6.48605e-11	TRUE	1.11865	0.295472	FALSE	3.69985	2.58319e-15	TRUE	-2.21157	6.22896e-08	TRUE	0.369638	0.557955	FALSE	2.58121	3.45945e-12	TRUE
chr2_44191761_44192043	chr2	44191761	44192043	+	intron (NM_177969, intron 1 of 4)	23099	5495	PPM1B	3.45459	7.74458e-07	TRUE	0.734591	0.720094	FALSE	3.74415	3.05154e-09	TRUE	-2.72	2.70846e-06	TRUE	0.28956	0.737998	FALSE	3.00956	5.86977e-09	TRUE
chr4_27003772_27004194	chr4	27003772	27004194	+	intron (NM_020860, intron 7 of 11)	143292	57620	STIM2	3.28371	6.96384e-07	TRUE	1.31096	0.331899	FALSE	3.74343	2.23327e-10	TRUE	-1.97275	0.000189769	TRUE	0.459719	0.547173	FALSE	2.43247	8.61385e-08	TRUE
chr1_203652821_203653023	chr1	203652821	203653023	+	intron (NM_001001396, intron 1 of 21)	26135	493	ATP2B4	2.83107	0.000531738	TRUE	0.523011	0.822112	FALSE	3.74148	8.4788e-09	TRUE	-2.30806	0.00154555	TRUE	0.910412	0.21754	FALSE	3.21847	5.57728e-09	TRUE
chr16_31107673_31107877	chr16	31107673	31107877	+	promoter-TSS (NM_005881)	-519	10295	BCKDK	3.14108	7.71106e-06	TRUE	0.963518	0.547442	FALSE	3.73551	1.31366e-09	TRUE	-2.17756	0.000227578	TRUE	0.594424	0.453867	FALSE	2.77199	3.11923e-08	TRUE
chr3_67329412_67329780	chr3	67329412	67329780	+	Intergenic	104132	100422941	MIR4272	3.27911	9.01388e-11	TRUE	1.11335	0.294353	FALSE	3.7341	2.75443e-16	TRUE	-2.16576	7.9858e-08	TRUE	0.454996	0.425998	FALSE	2.62076	2.93852e-13	TRUE
chr10_95819919_95820213	chr10	95819919	95820213	+	intron (NM_001312654, intron 2 of 9)	64150	953	ENTPD1	3.41463	2.45908e-06	TRUE	1.98143	0.107911	FALSE	3.72859	1.2889e-08	TRUE	-1.4332	0.0108833	TRUE	0.313962	0.736738	FALSE	1.74716	0.000192682	TRUE
chr12_25713312_25713628	chr12	25713312	25713628	+	Intergenic	-64908	160492	LMNTD1	3.33712	6.10638e-07	TRUE	1.669	0.162613	FALSE	3.72836	7.70483e-10	TRUE	-1.66813	0.00168263	TRUE	0.391243	0.644322	FALSE	2.05937	5.87935e-06	TRUE
chr9_4982865_4983106	chr9	4982865	4983106	+	Intergenic	-2101	3717	JAK2	3.68188	7.99337e-08	TRUE	0.73462	0.722045	FALSE	3.72774	1.15331e-08	TRUE	-2.94726	2.13097e-07	TRUE	0.04586	0.968982	FALSE	2.99312	2.83191e-08	TRUE
chr2_64606657_64606824	chr2	64606657	64606824	+	promoter-TSS (NR_034023)	-572	339807	LINC02579	3.1996	0.000408928	TRUE	2.52142	0.0476651	TRUE	3.72772	1.16629e-06	TRUE	-0.678175	0.453746	FALSE	0.528123	0.581952	FALSE	1.2063	0.022844	TRUE
chr2_168201291_168201566	chr2	168201291	168201566	+	intron (NM_013233, intron 1 of 17)	46167	27347	STK39	2.84139	0.00436616	TRUE	2.02329	0.181995	FALSE	3.72738	1.99772e-06	TRUE	-0.8181	0.434228	FALSE	0.885989	0.343432	FALSE	1.70409	0.00264086	TRUE
chr7_39531808_39532106	chr7	39531808	39532106	+	Intergenic	-34419	57002	YAE1D1	3.32602	1.13568e-05	TRUE	0.731714	0.727108	FALSE	3.1529	2.33127e-05	TRUE	-2.59431	5.47189e-05	TRUE	-0.173121	0.89021	FALSE	2.42118	0.000135474	TRUE
chr20_45752684_45753039	chr20	45752684	45753039	+	Intergenic	30526	391253	SPINT4	3.32532	4.63221e-07	TRUE	0.978065	0.532972	FALSE	3.75957	2.09717e-10	TRUE	-2.34726	1.48783e-05	TRUE	0.434249	0.578922	FALSE	2.7815	5.38341e-09	TRUE
chrX_134599293_134599703	chrX	134599293	134599703	+	intron (NM_001316889, intron 1 of 1)	49474	100506757	LINC00629	3.48065	3.5176e-05	TRUE	1.45842	0.428115	FALSE	3.72464	9.22035e-07	TRUE	-2.02222	0.00216106	TRUE	0.243993	0.823156	FALSE	2.26622	6.67993e-05	TRUE
chr4_150962303_150962603	chr4	150962303	150962603	+	intron (NM_006726, intron 2 of 57)	52814	987	LRBA	3.31955	0.000128552	TRUE	1.45886	0.426226	FALSE	3.80166	2.76057e-07	TRUE	-1.86069	0.00733099	TRUE	0.482105	0.590931	FALSE	2.34279	2.00479e-05	TRUE
chr1_211833306_211833532	chr1	211833306	211833532	+	intron (NR_135818, intron 2 of 2)	2458	102723727	LOC102723727	3.50122	2.27866e-06	TRUE	2.64156	0.0099942	TRUE	3.72433	5.42434e-08	TRUE	-0.859659	0.187876	FALSE	0.22311	0.837514	FALSE	1.08277	0.0291195	TRUE
chr7_77887668_77887897	chr7	77887668	77887897	+	intron (NM_001127360, intron 2 of 8)	47652	57157	PHTF2	2.76962	0.00508718	TRUE	2.13992	0.134849	FALSE	3.72427	7.28102e-07	TRUE	-0.629707	0.568338	FALSE	0.954641	0.258981	FALSE	1.58435	0.00240381	TRUE
chr1_198040963_198041231	chr1	198040963	198041231	+	Intergenic	-115881	140609	NEK7	3.31222	0.000248103	TRUE	1.05805	0.630844	FALSE	3.99434	1.14323e-07	TRUE	-2.25417	0.00291481	TRUE	0.682119	0.443862	FALSE	2.93629	8.79181e-07	TRUE
chr6_144310874_144311156	chr6	144310874	144311156	+	intron (NM_007124, intron 1 of 73)	19278	7402	UTRN	2.92784	0.00213735	TRUE	1.45877	0.426738	FALSE	3.72318	8.01772e-07	TRUE	-1.46907	0.0805079	FALSE	0.795346	0.362706	FALSE	2.26441	5.8341e-05	TRUE
chr17_27578774_27579061	chr17	27578774	27579061	+	intron (NM_014238, intron 4 of 20)	-52231	3965	LGALS9	2.52929	0.00393366	TRUE	2.27935	0.0400765	TRUE	3.72298	1.13816e-08	TRUE	-0.249935	0.84391	FALSE	1.19369	0.101123	FALSE	1.44362	0.00151406	TRUE
chr8_55988711_55988804	chr8	55988711	55988804	+	intron (NM_001111097, intron 10 of 12)	85144	26795	SNORD54	3.55686	3.5273e-07	TRUE	2.58768	0.00990839	TRUE	3.72241	9.68317e-09	TRUE	-0.969179	0.0790484	FALSE	0.165552	0.869542	FALSE	1.13473	0.0109922	TRUE
chr1_12201619_12201983	chr1	12201619	12201983	+	intron (NM_001066, intron 8 of 9)	10088	100616438	MIR4632	3.31166	3.69193e-12	TRUE	0.543703	0.68703	FALSE	3.55013	1.45379e-15	TRUE	-2.76796	1.18782e-11	TRUE	0.238471	0.725423	FALSE	3.00643	2.32612e-15	TRUE
chr1_234271255_234271543	chr1	234271255	234271543	+	intron (NM_173508, intron 3 of 7)	-35068	100616380	MIR4671	3.31134	1.46751e-08	TRUE	1.1964	0.333778	FALSE	4.06566	3.24624e-16	TRUE	-2.11493	5.00735e-06	TRUE	0.754319	0.164253	FALSE	2.86925	9.09233e-14	TRUE
chr5_458978_459236	chr5	458978	459236	+	intron (NM_007277, intron 6 of 12)	13858	25845	PP7080	3.31107	0.000212124	TRUE	2.34069	0.0866184	FALSE	3.63203	4.67305e-06	TRUE	-0.970375	0.221762	FALSE	0.320963	0.781476	FALSE	1.29134	0.0228271	TRUE
chr1_210373669_210374267	chr1	210373669	210374267	+	intron (NM_001122834, intron 3 of 11)	44672	55733	HHAT	3.18888	1.10964e-14	TRUE	2.02836	0.000262623	TRUE	3.71982	3.46118e-23	TRUE	-1.16052	0.000262945	TRUE	0.530941	0.244406	FALSE	1.69146	4.97391e-10	TRUE
chr7_66887045_66887307	chr7	66887045	66887307	+	Intergenic	-16944	644794	LOC644794	3.30997	2.33927e-08	TRUE	-0.727139	0.725925	FALSE	3.87011	1.20768e-13	TRUE	-4.03711	1.90654e-11	TRUE	0.560141	0.374443	FALSE	4.59725	3.47379e-18	TRUE
chr8_132918284_132918716	chr8	132918284	132918716	+	intron (NM_003235, intron 20 of 47)	51540	7038	TG	3.30703	3.02966e-15	TRUE	1.28493	0.0937689	FALSE	3.70345	9.37605e-22	TRUE	-2.0221	9.50882e-10	TRUE	0.396414	0.432616	FALSE	2.41852	1.16997e-15	TRUE
chr6_142850762_142850979	chr6	142850762	142850979	+	intron (NM_006734, intron 1 of 9)	94331	3097	HIVEP2	3.30508	4.9266e-06	TRUE	0.921745	0.620366	FALSE	3.63437	1.9604e-08	TRUE	-2.38333	5.80145e-05	TRUE	0.329297	0.709127	FALSE	2.71263	1.6067e-07	TRUE
chr1_20932272_20932642	chr1	20932272	20932642	+	intron (NM_001198802, intron 12 of 34)	55975	100302155	MIR1256	3.30224	1.17104e-09	TRUE	0.536204	0.737243	FALSE	3.8462	1.36828e-15	TRUE	-2.76604	2.50587e-09	TRUE	0.543951	0.346119	FALSE	3.30999	6.51665e-16	TRUE
chr2_108565787_108566118	chr2	108565787	108566118	+	intron (NM_001193483, intron 1 of 9)	-22349	3987	LIMS1	3.30217	4.58161e-06	TRUE	-0.413296	0.884624	FALSE	3.46961	1.67765e-07	TRUE	-3.71547	1.04039e-07	TRUE	0.167436	0.872653	FALSE	3.8829	1.67025e-09	TRUE
chr2_3222643_3223001	chr2	3222643	3223001	+	intron (NM_001330531, intron 3 of 7)	-96796	101927554	LINC01250	3.07533	5.02529e-07	TRUE	1.99009	0.0308861	TRUE	3.71287	2.06647e-12	TRUE	-1.08523	0.0316815	TRUE	0.637541	0.3089	FALSE	1.72277	4.47193e-06	TRUE
chr3_179000172_179000472	chr3	179000172	179000472	+	Intergenic	71546	64393	ZMAT3	2.92457	6.31085e-05	TRUE	2.19944	0.0299344	TRUE	3.70977	1.87004e-09	TRUE	-0.725125	0.336878	FALSE	0.7852	0.305029	FALSE	1.51033	0.000858397	TRUE
chr4_77025981_77026298	chr4	77025981	77026298	+	intron (NM_001306147, intron 9 of 11)	48771	10983	CCNI	3.0436	0.000130524	TRUE	2.13484	0.0713771	FALSE	3.70857	3.46303e-08	TRUE	-0.908765	0.221303	FALSE	0.664968	0.425874	FALSE	1.57373	0.00113581	TRUE
chr2_217085668_217085811	chr2	217085668	217085811	+	Intergenic	-196994	105373877	DIRC3-AS1	2.99693	0.00205677	TRUE	3.41626	0.000602025	TRUE	3.70854	3.26331e-06	TRUE	0.419334	0.686902	FALSE	0.711613	0.472035	FALSE	0.292279	0.640855	FALSE
chr8_106580872_106581126	chr8	106580872	106581126	+	intron (NM_001198533, intron 3 of 16)	-76809	55074	OXR1	3.29963	7.48781e-06	TRUE	2.13806	0.0658685	FALSE	4.13127	9.31917e-12	TRUE	-1.16157	0.0517507	FALSE	0.83164	0.19796	FALSE	1.99321	1.40874e-06	TRUE
chr18_44922974_44923333	chr18	44922974	44923333	+	intron (NM_015559, intron 3 of 5)	47013	100422829	MIR4319	3.28618	1.0563e-06	TRUE	0.527802	0.794295	FALSE	3.39322	8.11757e-08	TRUE	-2.75838	2.23196e-06	TRUE	0.107044	0.924258	FALSE	2.86542	1.38618e-07	TRUE
chr14_73700329_73700663	chr14	73700329	73700663	+	3' UTR (NM_031427, exon 8 of 8)	13929	9240	PNMA1	3.27583	6.7597e-08	TRUE	1.82635	0.0660911	FALSE	4.00948	2.33943e-14	TRUE	-1.44948	0.00245745	TRUE	0.733646	0.22463	FALSE	2.18313	1.25233e-08	TRUE
chr14_50762565_50762937	chr14	50762565	50762937	+	intron (NM_182946, intron 15 of 29)	-59046	105370489	LOC105370489	3.09844	3.60174e-06	TRUE	1.8895	0.0789993	FALSE	3.69741	1.19181e-10	TRUE	-1.20895	0.0267459	TRUE	0.598963	0.38243	FALSE	1.80791	1.00055e-05	TRUE
chr6_52227537_52227870	chr6	52227537	52227870	+	Intergenic	16797	112744	IL17F	3.23125	6.32224e-07	TRUE	1.74758	0.122007	FALSE	3.6972	9.15393e-11	TRUE	-1.48367	0.00332086	TRUE	0.465956	0.507279	FALSE	1.94963	2.12751e-06	TRUE
chrX_39874429_39874797	chrX	39874429	39874797	+	Intergenic	37052	100616251	MIR1587	2.94198	8.64631e-06	TRUE	1.51976	0.177573	FALSE	3.69235	8.34521e-11	TRUE	-1.42223	0.0120351	TRUE	0.750363	0.290485	FALSE	2.17259	7.35245e-07	TRUE
chr20_37922084_37922418	chr20	37922084	37922418	+	intron (NM_080607, intron 1 of 3)	19154	128434	VSTM2L	3.01791	1.34354e-06	TRUE	0.789965	0.603288	FALSE	3.69163	6.35522e-12	TRUE	-2.22795	2.37501e-05	TRUE	0.673717	0.294368	FALSE	2.90166	5.45484e-11	TRUE
chr4_15771404_15771767	chr4	15771404	15771767	+	Intergenic	-6680	952	CD38	3.273	1.8472e-10	TRUE	1.17247	0.26155	FALSE	3.23491	8.66277e-11	TRUE	-2.10053	2.94809e-07	TRUE	-0.0380887	0.970055	FALSE	2.06244	1.71672e-07	TRUE
chr15_83199268_83199664	chr15	83199268	83199664	+	intron (NM_016073, intron 1 of 5)	8552	50810	HDGFL3	3.44389	4.61144e-12	TRUE	-0.645089	0.711028	FALSE	3.69088	2.03271e-15	TRUE	-4.08898	1.7813e-16	TRUE	0.246995	0.723364	FALSE	4.33597	1.36031e-20	TRUE
chr21_34860115_34860480	chr21	34860115	34860480	+	intron (NM_001001890, intron 2 of 5)	28393	861	RUNX1	3.26612	8.7435e-07	TRUE	-0.805641	0.728658	FALSE	4.0191	1.15072e-12	TRUE	-4.07176	2.22541e-09	TRUE	0.75298	0.238666	FALSE	4.82474	7.5771e-17	TRUE
chr3_46955870_46956214	chr3	46955870	46956214	+	intron (NM_144716, intron 2 of 7)	20459	151903	CCDC12	3.26599	1.77669e-09	TRUE	0.75282	0.587321	FALSE	3.82539	1.40867e-15	TRUE	-2.51317	2.52551e-08	TRUE	0.5594	0.324464	FALSE	3.07257	7.00595e-15	TRUE
chr3_186217770_186218130	chr3	186217770	186218130	+	intron (NM_001080745, intron 19 of 23)	-108838	2119	ETV5	3.26435	7.69035e-06	TRUE	1.89607	0.129727	FALSE	3.84119	6.5139e-10	TRUE	-1.36828	0.017213	TRUE	0.576839	0.423529	FALSE	1.94512	7.82626e-06	TRUE
chr1_23904735_23905164	chr1	23904735	23905164	+	intron (NM_001841, intron 1 of 1)	8378	1269	CNR2	3.01459	7.46402e-12	TRUE	1.90708	0.00230724	TRUE	3.68672	9.03023e-22	TRUE	-1.10751	0.00118275	TRUE	0.672128	0.11398	FALSE	1.77964	8.04936e-11	TRUE
chr10_16646719_16647034	chr10	16646719	16647034	+	intron (NM_152724, intron 7 of 7)	-124871	389941	C1QL3	3.2633	0.000240515	TRUE	2.02721	0.174546	FALSE	3.68499	1.63538e-06	TRUE	-1.23608	0.0959749	FALSE	0.421697	0.677055	FALSE	1.65778	0.00245186	TRUE
chr8_6648179_6648527	chr8	6648179	6648527	+	3' UTR (NM_001322042, exon 15 of 15)	-26133	102465861	MIR8055	3.61737	1.00297e-06	TRUE	1.08047	0.544026	FALSE	3.68589	1.71262e-07	TRUE	-2.5369	2.64012e-05	TRUE	0.0685133	0.95875	FALSE	2.60542	4.94527e-06	TRUE
chr4_85673386_85673786	chr4	85673386	85673786	+	intron (NM_001025616, intron 2 of 9)	-48882	100616349	MIR4451	3.13289	0.000671965	TRUE	1.05996	0.626335	FALSE	3.68561	1.99934e-06	TRUE	-2.07293	0.00805349	TRUE	0.552716	0.570907	FALSE	2.62564	2.01643e-05	TRUE
chr4_39764093_39764387	chr4	39764093	39764387	+	intron (NM_001111112, intron 4 of 5)	66196	3093	UBE2K	3.26264	5.28099e-06	TRUE	-0.0303995	0.992151	FALSE	3.06123	1.59867e-05	TRUE	-3.29304	5.95042e-07	TRUE	-0.201414	0.85256	FALSE	3.09163	2.52915e-06	TRUE
chr4_163744930_163745155	chr4	163744930	163745155	+	intron (NM_001166373, intron 3 of 7)	-131418	55016	2018-03-01	2.66206	0.00126826	TRUE	0.272072	0.917326	FALSE	3.68534	3.71304e-09	TRUE	-2.38999	0.00161185	TRUE	1.02327	0.12968	FALSE	3.41326	3.91591e-10	TRUE
chr10_79674968_79675278	chr10	79674968	79675278	+	Intergenic	-7852	650623	BEND3P3	3.26243	7.63535e-06	TRUE	1.70628	0.201842	FALSE	3.69093	7.6427e-09	TRUE	-1.55616	0.00641567	TRUE	0.428496	0.594371	FALSE	1.98465	1.69205e-05	TRUE
chr4_139014365_139014480	chr4	139014365	139014480	+	Intergenic	-1337	25819	NOCT	2.85105	0.0033533	TRUE	1.27306	0.5196	FALSE	3.68494	1.29477e-06	TRUE	-1.57799	0.0690435	FALSE	0.833889	0.346486	FALSE	2.41188	3.58406e-05	TRUE
chr2_200814367_200814625	chr2	200814367	200814625	+	intron (NM_001321693, intron 2 of 10)	2163	9689	BZW1	3.26144	2.99045e-07	TRUE	-0.805094	0.726134	FALSE	3.43303	5.74236e-09	TRUE	-4.06654	4.81851e-10	TRUE	0.171588	0.854791	FALSE	4.23812	2.46694e-12	TRUE
chr9_101586746_101586935	chr9	101586746	101586935	+	intron (NM_133445, intron 6 of 8)	8161	5535	PPP3R2	3.62713	7.09449e-06	TRUE	1.45886	0.426355	FALSE	3.68411	1.19152e-06	TRUE	-2.16827	0.000454493	TRUE	0.0569772	0.964451	FALSE	2.22525	8.78183e-05	TRUE
chr8_76991997_76992201	chr8	76991997	76992201	+	intron (NM_001172086, intron 2 of 4)	8189	5828	PEX2	3.42955	4.92557e-05	TRUE	1.6232	0.343887	FALSE	3.68395	1.16843e-06	TRUE	-1.80635	0.0060905	TRUE	0.254403	0.814851	FALSE	2.06075	0.000210484	TRUE
chr1_88867823_88868025	chr1	88867823	88868025	+	intron (NM_001514, intron 2 of 6)	23694	2959	GTF2B	3.58027	1.14107e-05	TRUE	1.77072	0.277679	FALSE	3.68393	1.16843e-06	TRUE	-1.80954	0.00327792	TRUE	0.103667	0.929808	FALSE	1.91321	0.000472531	TRUE
chr8_125307565_125307837	chr8	125307565	125307837	+	intron (NM_001349485, intron 4 of 6)	-122620	10221	TRIB1	1.51802	0.276133	FALSE	2.88613	0.00976321	TRUE	3.68393	1.16843e-06	TRUE	1.3681	0.119423	FALSE	2.16591	0.0142064	TRUE	0.797804	0.120663	FALSE
chr7_130966742_130966903	chr7	130966742	130966903	+	intron (NR_109852, intron 4 of 5)	53358	100506860	LINC00513	3.00109	0.001325	TRUE	1.62322	0.343887	FALSE	3.6839	1.16843e-06	TRUE	-1.37787	0.089751	FALSE	0.682805	0.446341	FALSE	2.06068	0.000210484	TRUE
chr13_48979052_48979211	chr13	48979052	48979211	+	intron (NM_001278438, intron 1 of 25)	2522	22862	FNDC3A	2.59171	0.0120942	TRUE	1.77075	0.277679	FALSE	3.6839	1.16843e-06	TRUE	-0.820963	0.463651	FALSE	1.09218	0.202593	FALSE	1.91315	0.000472531	TRUE
chr20_10350904_10351110	chr20	10350904	10351110	+	Intergenic	80918	8195	MKKS	2.92794	0.00208761	TRUE	0.124804	0.970887	FALSE	3.68386	1.16848e-06	TRUE	-2.80314	0.00159383	TRUE	0.755923	0.392339	FALSE	3.55906	1.65107e-07	TRUE
chr18_69864800_69865096	chr18	69864800	69865096	+	intron (NM_006566, intron 6 of 6)	82905	10666	CD226	3.26121	0.000206176	TRUE	1.27332	0.519014	FALSE	3.59956	3.02312e-06	TRUE	-1.98788	0.00551636	TRUE	0.338352	0.751344	FALSE	2.32624	8.75738e-05	TRUE
chr9_20361795_20362043	chr9	20361795	20362043	+	intron (NM_001286691, intron 7 of 10)	49319	100616229	MIR4473	3.6267	7.62784e-06	TRUE	0.124699	0.970887	FALSE	3.68338	1.31011e-06	TRUE	-3.502	1.58514e-06	TRUE	0.0566894	0.964902	FALSE	3.55869	1.92675e-07	TRUE
chr15_40226812_40227029	chr15	40226812	40227029	+	intron (NM_001128629, intron 1 of 9)	9492	106821730	BUB1B-PAK6	3.67327	4.62812e-06	TRUE	0.508177	0.859262	FALSE	3.68321	1.30209e-06	TRUE	-3.16509	3.76628e-06	TRUE	0.00993716	0.993182	FALSE	3.17503	9.30418e-07	TRUE
chr4_53132504_53132821	chr4	53132504	53132821	+	intron (NM_152540, intron 5 of 8)	233413	152579	SCFD2	3.35836	1.89446e-07	TRUE	2.01727	0.051315	FALSE	3.68244	3.03158e-10	TRUE	-1.3411	0.00719566	TRUE	0.324076	0.692807	FALSE	1.66517	6.32785e-05	TRUE
chr1_30986862_30987069	chr1	30986862	30987069	+	intron (NM_001020658, intron 7 of 21)	-18728	692200	SNORD103C	3.26105	0.000209873	TRUE	1.27331	0.519293	FALSE	3.59991	3.10898e-06	TRUE	-1.98774	0.00560125	TRUE	0.338862	0.751944	FALSE	2.3266	9.00409e-05	TRUE
chr17_38943709_38943908	chr17	38943709	38943908	+	intron (NM_001008777, intron 7 of 10)	18640	100505576	LINC00672	3.52994	2.54838e-05	TRUE	1.06088	0.625385	FALSE	3.68126	1.84157e-06	TRUE	-2.46906	0.000272645	TRUE	0.151325	0.897655	FALSE	2.62038	1.85032e-05	TRUE
chr1_3313092_3313405	chr1	3313092	3313405	+	intron (NM_199454, intron 3 of 16)	-141335	27237	ARHGEF16	3.1388	0.000627513	TRUE	3.17765	0.00215048	TRUE	3.68106	1.89543e-06	TRUE	0.0388525	0.978868	FALSE	0.54226	0.576883	FALSE	0.503407	0.35986	FALSE
chr20_39019791_39020093	chr20	39019791	39020093	+	intron (NR_033905, intron 15 of 21)	57604	60625	DHX35	2.99431	1.43683e-05	TRUE	0.973177	0.532253	FALSE	3.68082	2.70567e-10	TRUE	-2.02113	0.000461528	TRUE	0.686511	0.322904	FALSE	2.70764	6.12832e-09	TRUE
chr3_4387277_4387521	chr3	4387277	4387521	+	intron (NM_182760, intron 7 of 8)	79883	285362	SUMF1	3.42679	7.41146e-05	TRUE	-0.39697	0.908126	FALSE	3.67777	2.35082e-06	TRUE	-3.82376	5.43953e-06	TRUE	0.250981	0.826322	FALSE	4.07474	7.11687e-08	TRUE
chr18_58563368_58563582	chr18	58563368	58563582	+	intron (NM_052947, intron 4 of 12)	-37145	106635543	SNORA108	3.26033	0.000261254	TRUE	2.43185	0.063959	FALSE	4.31122	3.44991e-10	TRUE	-0.828476	0.315743	FALSE	1.05089	0.128346	FALSE	1.87937	2.60935e-05	TRUE
chr7_106345558_106345798	chr7	106345558	106345798	+	Intergenic	-60486	10135	NAMPT	2.33179	0.00142036	TRUE	1.71511	0.0983985	FALSE	3.67601	2.80784e-11	TRUE	-0.616682	0.472595	FALSE	1.34421	0.0281074	TRUE	1.96089	1.92208e-06	TRUE
chr15_44546363_44546660	chr15	44546363	44546660	+	intron (NM_001284336, intron 2 of 5)	9443	8669	EIF3J	2.48006	0.000270635	TRUE	0.903738	0.521464	FALSE	3.67567	1.07263e-12	TRUE	-1.57632	0.00893134	TRUE	1.19561	0.0281074	TRUE	2.77194	2.18588e-11	TRUE
chr18_54285011_54285472	chr18	54285011	54285472	+	intron (NR_147257, intron 8 of 9)	15762	11201	POLI	3.23843	3.30866e-08	TRUE	1.3633	0.237872	FALSE	3.67459	2.0038e-12	TRUE	-1.87513	4.19174e-05	TRUE	0.43616	0.504474	FALSE	2.31129	5.10919e-09	TRUE
chr19_10797593_10797983	chr19	10797593	10797983	+	intron (NM_001005361, intron 10 of 20)	17534	100616425	MIR4748	3.17566	1.58299e-07	TRUE	2.427	0.00259662	TRUE	3.67378	7.49159e-12	TRUE	-0.748666	0.167837	FALSE	0.498119	0.460679	FALSE	1.24678	0.000929617	TRUE
chr1_88401370_88401561	chr1	88401370	88401561	+	Intergenic	-282679	5586	PKN2	3.19277	0.000525293	TRUE	0.12433	0.971012	FALSE	3.67316	3.35032e-06	TRUE	-3.06844	0.000294574	TRUE	0.480382	0.647545	FALSE	3.54883	6.82933e-07	TRUE
chr10_70587310_70587602	chr10	70587310	70587602	+	Intergenic	15332	5551	PRF1	3.16828	5.1929e-07	TRUE	1.57749	0.152117	FALSE	3.67226	8.66862e-11	TRUE	-1.59079	0.00195887	TRUE	0.50398	0.503989	FALSE	2.09477	1.27087e-06	TRUE
chr13_46542902_46543139	chr13	46542902	46543139	+	Intergenic	-10141	23143	LRCH1	3.2599	0.000231366	TRUE	1.06047	0.624528	FALSE	3.50962	9.37634e-06	TRUE	-2.19942	0.0027662	TRUE	0.249721	0.831636	FALSE	2.44914	0.000104632	TRUE
chr14_67746994_67747284	chr14	67746994	67747284	+	3' UTR (NM_015346, exon 42 of 42)	45253	145226	RDH12	3.08987	4.26525e-05	TRUE	1.08509	0.527275	FALSE	3.6606	1.01995e-08	TRUE	-2.00478	0.0012495	TRUE	0.570735	0.453289	FALSE	2.57551	2.35459e-07	TRUE
chr6_4637793_4638145	chr6	4637793	4638145	+	Intergenic	27404	497048	KU-MEL-3	3.09845	5.77928e-08	TRUE	1.11177	0.342693	FALSE	3.65878	4.12952e-13	TRUE	-1.98668	1.96352e-05	TRUE	0.560328	0.375676	FALSE	2.54701	2.04995e-10	TRUE
chr2_26757916_26758285	chr2	26757916	26758285	+	Intergenic	-6174	54978	SLC35F6	2.82149	0.000103532	TRUE	1.81677	0.106182	FALSE	3.65773	9.52147e-10	TRUE	-1.00472	0.133065	FALSE	0.836237	0.235843	FALSE	1.84096	2.68508e-05	TRUE
chr1_200118929_200119185	chr1	200118929	200119185	+	intron (NM_205860, intron 6 of 7)	76232	2494	NR5A2	3.25843	0.000249861	TRUE	0.809613	0.742192	FALSE	4.04089	1.79833e-08	TRUE	-2.44881	0.0011728	TRUE	0.78246	0.317957	FALSE	3.23127	2.62825e-08	TRUE
chr3_25849662_25849991	chr3	25849662	25849991	+	Intergenic	23869	285326	LINC00692	3.25628	0.000288729	TRUE	1.90346	0.22691	FALSE	3.91764	1.46952e-07	TRUE	-1.35283	0.0707958	FALSE	0.661361	0.448144	FALSE	2.01419	0.000144779	TRUE
chr17_64385014_64385516	chr17	64385014	64385516	+	intron (NM_000442, intron 2 of 15)	5613	5175	PECAM1	3.17867	1.85271e-07	TRUE	2.82463	8.04888e-05	TRUE	3.65311	1.83592e-11	TRUE	-0.354037	0.628683	FALSE	0.474443	0.499105	FALSE	0.82848	0.0342023	FALSE
chr13_99064092_99064350	chr13	99064092	99064350	+	intron (NM_001130049, intron 1 of 32)	22185	23348	DOCK9	3.13681	3.27608e-05	TRUE	-0.0290503	0.992278	FALSE	3.64936	1.88347e-08	TRUE	-3.16586	6.01695e-06	TRUE	0.512549	0.520555	FALSE	3.67841	6.47895e-10	TRUE
chr1_8899967_8900181	chr1	8899967	8900181	+	Intergenic	21239	100505975	ENO1-AS1	2.93633	0.000254067	TRUE	3.16624	0.000174788	TRUE	3.64902	4.03958e-08	TRUE	0.229909	0.822217	FALSE	0.712691	0.375676	FALSE	0.482782	0.323385	FALSE
chr9_107219400_107219848	chr9	107219400	107219848	+	Intergenic	-63612	5887	RAD23B	2.82406	0.000684915	TRUE	1.08362	0.535662	FALSE	3.64857	6.77737e-08	TRUE	-1.74044	0.0170772	TRUE	0.824504	0.311124	FALSE	2.56494	1.86626e-06	TRUE
chr3_5051809_5052080	chr3	5051809	5052080	+	Intergenic	-70301	55207	ARL8B	3.25436	9.55896e-07	TRUE	1.88391	0.0850163	FALSE	4.10258	1.5065e-13	TRUE	-1.37045	0.0094984	TRUE	0.848222	0.164294	FALSE	2.21867	2.14021e-08	TRUE
chr9_91798743_91799165	chr9	91798743	91799165	+	intron (NM_001318204, intron 1 of 7)	151208	4920	ROR2	3.25381	2.43458e-10	TRUE	1.79986	0.0280316	TRUE	3.01176	5.18045e-09	TRUE	-1.45395	0.000240183	TRUE	-0.242053	0.760901	FALSE	1.2119	0.00238721	TRUE
chr12_101859714_101859965	chr12	101859714	101859965	+	Intergenic	-17488	55332	DRAM1	3.2532	1.12978e-07	TRUE	0.389254	0.843679	FALSE	3.26153	2.93699e-08	TRUE	-2.86395	1.03846e-07	TRUE	0.00832842	0.993689	FALSE	2.87228	2.64809e-08	TRUE
chr14_77184582_77184841	chr14	77184582	77184841	+	intron (NM_020431, intron 1 of 23)	2952	57156	TMEM63C	3.25111	2.32044e-06	TRUE	1.31644	0.33715	FALSE	2.92839	2.39986e-05	TRUE	-1.93467	0.000580737	TRUE	-0.322716	0.760166	FALSE	1.61195	0.00479474	TRUE
chr3_70603047_70603470	chr3	70603047	70603470	+	Intergenic	461665	27086	FOXP1	3.24574	2.37125e-09	TRUE	0.415184	0.809192	FALSE	3.37485	4.82098e-11	TRUE	-2.83056	2.09844e-09	TRUE	0.129102	0.886121	FALSE	2.95966	2.77462e-11	TRUE
chr6_108068779_108069026	chr6	108068779	108069026	+	intron (NM_014028, intron 1 of 5)	5835	28962	OSTM1	3.06996	0.000898786	TRUE	2.43409	0.06136	FALSE	3.6429	2.2327e-06	TRUE	-0.635873	0.508751	FALSE	0.572944	0.545487	FALSE	1.20882	0.0237737	TRUE
chr12_47860396_47860690	chr12	47860396	47860690	+	intron (NM_001017535, intron 5 of 10)	-40563	51564	HDAC7	2.78326	9.93728e-05	TRUE	2.13975	0.0300657	TRUE	3.64277	3.13999e-10	TRUE	-0.643512	0.384975	FALSE	0.85951	0.194514	FALSE	1.50302	0.000212686	TRUE
chr9_105416919_105417099	chr9	105416919	105417099	+	intron (NM_001330731, intron 15 of 15)	-31025	83856	FSD1L	3.00106	0.001325	TRUE	0.124821	0.970887	FALSE	3.64246	1.87823e-06	TRUE	-2.87624	0.000893964	TRUE	0.641397	0.482826	FALSE	3.51764	3.02752e-07	TRUE
chr2_68745186_68745336	chr2	68745186	68745336	+	intron (NM_001007231, intron 1 of 10)	10480	9938	ARHGAP25	3.37558	7.97314e-05	TRUE	2.34222	0.0796179	FALSE	3.64242	1.87823e-06	TRUE	-1.03337	0.144464	FALSE	0.26684	0.806849	FALSE	1.30021	0.013965	TRUE
chr3_143582057_143582261	chr3	143582057	143582261	+	intron (NM_173653, intron 6 of 15)	239913	100885796	SLC9A9-AS1	3.13702	0.000529455	TRUE	1.27333	0.519014	FALSE	3.64242	1.87823e-06	TRUE	-1.86369	0.0134902	TRUE	0.505404	0.597437	FALSE	2.36909	5.31089e-05	TRUE
chr2_39225714_39225878	chr2	39225714	39225878	+	intron (NM_001009565, intron 2 of 7)	3792	344387	CDKL4	2.76959	0.00508718	TRUE	0.507995	0.859262	FALSE	3.64239	1.87823e-06	TRUE	-2.26159	0.0128932	TRUE	0.872801	0.325653	FALSE	3.13439	1.43128e-06	TRUE
chr20_50001951_50002176	chr20	50001951	50002176	+	Intergenic	19087	6615	SNAI1	3.07061	0.000840692	TRUE	2.2446	0.103992	FALSE	3.64239	1.87823e-06	TRUE	-0.826011	0.346205	FALSE	0.571774	0.539411	FALSE	1.39779	0.00859235	TRUE
chr2_127320107_127320352	chr2	127320107	127320352	+	intron (NM_006609, intron 11 of 15)	23000	10746	MAP3K2	2.38882	0.0279794	TRUE	1.45885	0.426226	FALSE	3.64235	1.87823e-06	TRUE	-0.929966	0.437823	FALSE	1.25353	0.152709	FALSE	2.1835	0.000140052	TRUE
chr6_133805964_133806237	chr6	133805964	133806237	+	intron (NR_109982, intron 2 of 8)	-15047	154089	LINC01312	3.00105	0.00134681	TRUE	2.34229	0.0799951	FALSE	3.64199	1.97215e-06	TRUE	-0.658757	0.499828	FALSE	0.640942	0.485614	FALSE	1.2997	0.0143811	TRUE
chrX_136546518_136546801	chrX	136546518	136546801	+	intron (NM_016267, intron 2 of 4)	-4219	100126324	MIR934	4.13815	0.0844627	FALSE	7.30095	5.69426e-09	TRUE	3.64132	0.123722	FALSE	3.16279	7.88184e-07	TRUE	-0.496828	0.877964	FALSE	-3.65962	1.47383e-08	TRUE
chr14_101878764_101879220	chr14	101878764	101879220	+	intron (NM_178586, intron 2 of 12)	69129	5527	PPP2R5C	3.23286	9.62182e-13	TRUE	0.947692	0.33613	FALSE	3.68876	2.24796e-19	TRUE	-2.28517	5.42614e-10	TRUE	0.4559	0.370153	FALSE	2.74107	9.87071e-17	TRUE
chr1_43199057_43199573	chr1	43199057	43199573	+	intron (NM_152498, intron 8 of 10)	-26745	10969	EBNA1BP2	3.62367	1.26922e-08	TRUE	0.697317	0.703572	FALSE	3.63969	2.9912e-09	TRUE	-2.92635	4.72662e-08	TRUE	0.0160232	0.988798	FALSE	2.94238	1.17884e-08	TRUE
chr15_76752432_76752916	chr15	76752432	76752916	+	intron (NR_148227, intron 15 of 32)	109270	49855	SCAPER	3.41685	4.30596e-06	TRUE	2.28584	0.0437078	TRUE	3.63742	1.17086e-07	TRUE	-1.13102	0.064712	FALSE	0.220571	0.840017	FALSE	1.35159	0.00676566	TRUE
chr15_65858085_65858312	chr15	65858085	65858312	+	Intergenic	-11261	8766	RAB11A	2.83788	0.00042995	TRUE	1.23329	0.445177	FALSE	3.63693	2.123e-08	TRUE	-1.60459	0.0205807	TRUE	0.79905	0.286385	FALSE	2.40364	1.45606e-06	TRUE
chr3_46111175_46111454	chr3	46111175	46111454	+	Intergenic	-83827	2829	XCR1	2.39005	0.00790073	TRUE	2.63959	0.00720463	TRUE	3.6369	2.67077e-08	TRUE	0.249545	0.834134	FALSE	1.24686	0.0872742	FALSE	0.997313	0.0278181	FALSE
chr8_130036793_130037067	chr8	130036793	130037067	+	Intergenic	-19801	51571	FAM49B	3.23032	1.78605e-05	TRUE	-0.0291588	0.992278	FALSE	3.43946	5.82001e-07	TRUE	-3.25948	2.9994e-06	TRUE	0.209136	0.851776	FALSE	3.46862	4.72824e-08	TRUE
chr3_94011309_94011713	chr3	94011309	94011713	+	intron (NM_182896, intron 3 of 10)	17099	415117	STX19	4.02273	1.30221e-07	TRUE	0.808995	0.742952	FALSE	3.63497	3.58005e-06	TRUE	-3.21374	2.24758e-07	TRUE	-0.38776	0.674537	FALSE	2.82598	1.18276e-05	TRUE
chr14_102819229_102819553	chr14	102819229	102819553	+	intron (NM_001199427, intron 1 of 7)	41912	7187	TRAF3	3.2226	1.53892e-06	TRUE	1.50673	0.232715	FALSE	3.47431	1.674e-08	TRUE	-1.71587	0.00138734	TRUE	0.251707	0.794375	FALSE	1.96757	2.87429e-05	TRUE
chr1_206955452_206955771	chr1	206955452	206955771	+	Intergenic	-9145	5284	PIGR	3.22252	1.29559e-05	TRUE	1.60228	0.250884	FALSE	4.14501	2.29294e-12	TRUE	-1.62024	0.00567202	TRUE	0.922482	0.125426	FALSE	2.54272	2.47369e-09	TRUE
chr7_107670389_107670677	chr7	107670389	107670677	+	intron (NM_000441, intron 3 of 20)	-8735	286002	SLC26A4-AS1	2.72745	0.00152843	TRUE	2.4105	0.0279354	TRUE	3.63415	1.47977e-07	TRUE	-0.316949	0.790951	FALSE	0.906699	0.281309	FALSE	1.22365	0.0153757	TRUE
chr5_124936616_124936780	chr5	124936616	124936780	+	Intergenic	-100133	101927421	LOC101927421	3.17943	4.3378e-05	TRUE	1.70885	0.214054	FALSE	3.63396	1.1507e-07	TRUE	-1.47058	0.0227736	TRUE	0.454534	0.627984	FALSE	1.92511	0.000183226	TRUE
chr6_150692699_150692916	chr6	150692699	150692916	+	intron (NM_001329800, intron 1 of 15)	9204	57480	PLEKHG1	3.22032	9.84771e-06	TRUE	0.920243	0.619778	FALSE	3.59933	2.05929e-08	TRUE	-2.30008	0.000120044	TRUE	0.379011	0.649216	FALSE	2.67909	1.62068e-07	TRUE
chr6_53634393_53634635	chr6	53634393	53634635	+	Intergenic	6134	101927171	LINC01564	3.52128	4.01554e-07	TRUE	0.270683	0.918344	FALSE	3.63204	2.40151e-08	TRUE	-3.2506	1.03846e-07	TRUE	0.110759	0.91494	FALSE	3.36136	4.18826e-09	TRUE
chr4_37715889_37716419	chr4	37715889	37716419	+	Intergenic	-29777	768211	RELL1	3.2189	1.51398e-05	TRUE	1.80493	0.164153	FALSE	3.9669	1.21228e-10	TRUE	-1.41397	0.0175404	TRUE	0.747998	0.266865	FALSE	2.16197	7.4748e-07	TRUE
chr11_14309076_14309368	chr11	14309076	14309368	+	intron (NM_001177314, intron 1 of 5)	49263	22800	RRAS2	3.21374	3.90302e-08	TRUE	0.903417	0.522023	FALSE	3.38496	4.97285e-10	TRUE	-2.31032	1.27534e-06	TRUE	0.171214	0.847029	FALSE	2.48154	1.52938e-08	TRUE
chr2_110881968_110882239	chr2	110881968	110882239	+	intron (NM_001142807, intron 10 of 17)	149530	55289	ACOXL	3.44899	1.69315e-06	TRUE	1.08808	0.531188	FALSE	3.62923	5.27809e-08	TRUE	-2.36091	4.74377e-05	TRUE	0.180245	0.863259	FALSE	2.54115	1.48374e-06	TRUE
chr2_101675387_101675905	chr2	101675387	101675905	+	Intergenic	-22057	9448	MAP4K4	3.21285	6.24915e-14	TRUE	1.21416	0.137571	FALSE	3.58697	5.05573e-20	TRUE	-1.99869	2.47826e-09	TRUE	0.374124	0.453867	FALSE	2.37282	5.23225e-15	TRUE
chr16_57049755_57050030	chr16	57049755	57050030	+	intron (NM_001330552, intron 23 of 47)	32818	84166	NLRC5	3.32205	1.9757e-07	TRUE	1.31575	0.323952	FALSE	3.62834	3.96829e-10	TRUE	-2.0063	6.09916e-05	TRUE	0.306288	0.705841	FALSE	2.31259	1.64062e-07	TRUE
chrX_20352891_20353171	chrX	20352891	20353171	+	Intergenic	-86399	6197	RPS6KA3	3.45559	7.60049e-07	TRUE	-0.41413	0.884391	FALSE	3.62827	1.877e-08	TRUE	-3.86972	1.06263e-08	TRUE	0.172674	0.86015	FALSE	4.0424	1.00683e-10	TRUE
chr3_16907337_16907614	chr3	16907337	16907614	+	intron (NM_001144382, intron 1 of 5)	22516	23228	PLCL2	2.94314	0.000143019	TRUE	1.08496	0.525897	FALSE	3.62808	1.08458e-08	TRUE	-1.85819	0.00410621	TRUE	0.684937	0.349355	FALSE	2.54313	2.47453e-07	TRUE
chr10_71933691_71934036	chr10	71933691	71934036	+	Intergenic	-30499	9469	CHST3	3.20828	4.36906e-08	TRUE	1.1045	0.388389	FALSE	2.55623	5.26853e-05	TRUE	-2.10378	6.86841e-06	TRUE	-0.652055	0.358641	FALSE	1.45173	0.00603825	TRUE
chr3_41188379_41188680	chr3	41188379	41188680	+	Intergenic	-10895	1499	CTNNB1	3.26361	7.80755e-06	TRUE	1.98234	0.10247	FALSE	3.62762	2.12706e-08	TRUE	-1.28127	0.0269969	TRUE	0.364007	0.673707	FALSE	1.64528	0.000325244	TRUE
chr1_46134753_46135096	chr1	46134753	46135096	+	intron (NR_125987, intron 2 of 2)	1553	101929626	LOC101929626	3.1524	4.15264e-07	TRUE	2.08551	0.0228623	TRUE	3.62603	6.94476e-11	TRUE	-1.06689	0.0421471	TRUE	0.473632	0.519628	FALSE	1.54052	0.000143343	TRUE
chr14_92728859_92729087	chr14	92728859	92729087	+	intron (NM_001008530, intron 3 of 14)	19729	5641	LGMN	3.04229	6.80378e-05	TRUE	2.13983	0.0616756	FALSE	3.62536	1.81279e-08	TRUE	-0.902463	0.183773	FALSE	0.583065	0.450862	FALSE	1.48553	0.000910352	TRUE
chr4_105453913_105454083	chr4	105453913	105454083	+	intron (NM_176869, intron 2 of 11)	20072	27068	PPA2	3.20737	0.000455973	TRUE	1.27504	0.523451	FALSE	4.18641	4.89821e-09	TRUE	-1.93233	0.0116351	TRUE	0.979032	0.199824	FALSE	2.91136	9.28025e-08	TRUE
chr2_192151886_192152185	chr2	192151886	192152185	+	intron (NM_016192, intron 4 of 9)	42898	23671	TMEFF2	2.86416	6.02965e-05	TRUE	1.31468	0.328899	FALSE	3.62483	1.06291e-09	TRUE	-1.54947	0.0106274	TRUE	0.760668	0.281309	FALSE	2.31014	4.38749e-07	TRUE
chr2_65417564_65418003	chr2	65417564	65418003	+	intron (NM_181784, intron 1 of 5)	14739	200734	SPRED2	3.13526	3.82541e-06	TRUE	0.528174	0.792626	FALSE	3.62229	1.43909e-09	TRUE	-2.60709	9.17298e-06	TRUE	0.487033	0.528802	FALSE	3.09412	1.38371e-09	TRUE
chr2_87633569_87633867	chr2	87633569	87633867	+	Intergenic	3958	100616341	MIR4435-2	3.20507	9.40958e-08	TRUE	0.66585	0.683325	FALSE	4.15535	6.55189e-17	TRUE	-2.53922	5.6299e-07	TRUE	0.950282	0.0655205	FALSE	3.4895	4.06062e-17	TRUE
chr1_240794071_240794453	chr1	240794071	240794453	+	intron (NM_001350115, intron 17 of 17)	-182100	64388	GREM2	3.38368	5.81724e-08	TRUE	-0.803203	0.727224	FALSE	3.61672	2.61138e-10	TRUE	-4.18689	5.56264e-11	TRUE	0.233042	0.781262	FALSE	4.41993	4.33157e-14	TRUE
chr12_47574373_47574623	chr12	47574373	47574623	+	Intergenic	131563	79657	RPAP3	3.37211	4.48682e-06	TRUE	0.73516	0.722915	FALSE	3.61525	7.36297e-08	TRUE	-2.63695	2.04168e-05	TRUE	0.243142	0.813894	FALSE	2.88009	2.3411e-07	TRUE
chr11_77797250_77797544	chr11	77797250	77797544	+	intron (NM_016578, intron 1 of 15)	23437	51773	RSF1	3.35476	9.34282e-08	TRUE	-0.42111	0.864355	FALSE	3.61369	2.99837e-10	TRUE	-3.77588	6.08461e-10	TRUE	0.258923	0.753293	FALSE	4.0348	3.81182e-13	TRUE
chr22_45254973_45255246	chr22	45254973	45255246	+	Intergenic	-14340	23313	KIAA0930	3.20049	0.000333971	TRUE	1.45885	0.426226	FALSE	3.46323	1.25989e-05	TRUE	-1.74164	0.0170527	TRUE	0.262738	0.823156	FALSE	2.00438	0.00090518	TRUE
chr1_217494833_217495074	chr1	217494833	217495074	+	intron (NM_018040, intron 7 of 9)	136159	55105	GPATCH2	3.40807	6.70327e-08	TRUE	1.09765	0.453905	FALSE	3.60854	7.17879e-10	TRUE	-2.31042	4.44388e-06	TRUE	0.200473	0.824047	FALSE	2.51089	4.74897e-08	TRUE
chr15_67024463_67024701	chr15	67024463	67024701	+	intron (NR_135686, intron 2 of 5)	39600	102723493	LOC102723493	3.0867	5.88385e-05	TRUE	2.47397	0.0173536	TRUE	3.60729	4.79798e-08	TRUE	-0.612727	0.43357	FALSE	0.520593	0.529243	FALSE	1.13332	0.0143504	TRUE
chr1_44254392_44254742	chr1	44254392	44254742	+	intron (NM_024066, intron 7 of 8)	-2008	106635545	SNORA110	3.19982	0.000358968	TRUE	1.27345	0.51977	FALSE	3.84042	2.06208e-07	TRUE	-1.92637	0.00930527	TRUE	0.640598	0.453867	FALSE	2.56697	5.17046e-06	TRUE
chr14_65369557_65369852	chr14	65369557	65369852	+	Intergenic	-34521	100616176	MIR4708	1.22696	0.562175	FALSE	4.89985	2.75197e-08	TRUE	3.6033	0.000623013	TRUE	3.67288	2.21573e-08	TRUE	2.37633	0.0812552	FALSE	-1.29655	0.00439364	TRUE
chr9_127426784_127427077	chr9	127426784	127427077	+	intron (NM_001286696, intron 1 of 4)	2556	7633	ZNF79	3.19495	1.26004e-06	TRUE	2.73622	0.000793438	TRUE	4.19129	3.86412e-15	TRUE	-0.458734	0.516862	FALSE	0.996335	0.0655845	FALSE	1.45507	2.43568e-05	TRUE
chr9_106980579_106980977	chr9	106980579	106980977	+	intron (NR_126029, intron 4 of 4)	117681	58499	ZNF462	3.18795	3.30866e-08	TRUE	-0.0285802	0.989827	FALSE	3.4318	1.53623e-10	TRUE	-3.21653	1.87649e-09	TRUE	0.243856	0.781476	FALSE	3.46038	3.29961e-12	TRUE
chr16_24668532_24668878	chr16	24668532	24668878	+	intron (NR_122072, intron 1 of 2)	2357	400511	LINC01567	3.17993	2.94319e-08	TRUE	1.92811	0.0271353	TRUE	3.60562	3.54662e-12	TRUE	-1.25182	0.00688803	TRUE	0.425696	0.547756	FALSE	1.67751	1.16113e-05	TRUE
chr3_102092634_102092887	chr3	102092634	102092887	+	Intergenic	-70945	101929411	LOC101929411	2.15256	0.0628977	FALSE	1.77076	0.277679	FALSE	3.59972	3.02288e-06	TRUE	-0.381799	0.814275	FALSE	1.44716	0.10189	FALSE	1.82896	0.00112045	TRUE
chr3_16286242_16286431	chr3	16286242	16286431	+	intron (NR_148220, intron 5 of 10)	21258	92106	OXNAD1	2.68339	0.00788637	TRUE	1.77073	0.277679	FALSE	3.5997	3.02288e-06	TRUE	-0.912654	0.379155	FALSE	0.916313	0.308406	FALSE	1.82897	0.00112045	TRUE
chr2_41475988_41476384	chr2	41475988	41476384	+	Intergenic	-401369	388942	LINC01913	2.92794	0.00208761	TRUE	3.01007	0.00513284	TRUE	3.59965	3.02289e-06	TRUE	0.0821307	0.95431	FALSE	0.671709	0.468925	FALSE	0.589578	0.273564	FALSE
chr15_41323726_41323921	chr15	41323726	41323921	+	intron (NM_007280, intron 2 of 4)	8798	11339	OIP5	2.92802	0.00208761	TRUE	0.124832	0.970887	FALSE	3.59965	3.02289e-06	TRUE	-2.80318	0.00159383	TRUE	0.671632	0.468925	FALSE	3.47482	5.48506e-07	TRUE
chr10_35208642_35208906	chr10	35208642	35208906	+	intron (NM_183060, intron 5 of 5)	12872	1390	CREM	2.38879	0.0279794	TRUE	1.06038	0.624029	FALSE	3.5996	3.02312e-06	TRUE	-1.32841	0.230567	FALSE	1.21081	0.173025	FALSE	2.53921	3.08067e-05	TRUE
chr16_84810981_84811251	chr16	84810981	84811251	+	Intergenic	-8865	83716	CRISPLD2	3.59279	1.57019e-07	TRUE	2.06253	0.0814557	FALSE	3.59959	3.70432e-08	TRUE	-1.53027	0.00230602	TRUE	0.00679345	0.995022	FALSE	1.53706	0.000890782	TRUE
chr9_94839493_94839719	chr9	94839493	94839719	+	intron (NM_032823, intron 5 of 14)	29644	100313780	MIR2278	2.38881	0.0279794	TRUE	0.124838	0.970887	FALSE	3.59958	3.02312e-06	TRUE	-2.26397	0.0369986	TRUE	1.21077	0.173025	FALSE	3.47474	5.48506e-07	TRUE
chr2_217440074_217440351	chr2	217440074	217440351	+	intron (NR_026597, intron 3 of 12)	157479	105373877	DIRC3-AS1	3.17765	1.94523e-05	TRUE	0.523281	0.821448	FALSE	3.11011	1.39282e-05	TRUE	-2.65437	3.59231e-05	TRUE	-0.0675395	0.958085	FALSE	2.58683	2.75277e-05	TRUE
chr3_114500058_114500446	chr3	114500058	114500446	+	intron (NR_121661, intron 1 of 2)	46659	101929754	ZBTB20-AS5	3.17758	7.65375e-09	TRUE	0.849271	0.518831	FALSE	2.80865	5.87283e-07	TRUE	-2.32831	2.81778e-07	TRUE	-0.368939	0.627534	FALSE	1.95937	2.89359e-05	TRUE
chr1_55189042_55189208	chr1	55189042	55189208	+	intron (NM_015306, intron 1 of 67)	26241	23358	USP24	2.49325	0.0187902	TRUE	1.06017	0.624298	FALSE	3.59849	3.33365e-06	TRUE	-1.43308	0.169671	FALSE	1.10524	0.216891	FALSE	2.53832	3.41472e-05	TRUE
chr6_189417_189721	chr6	189417	189721	+	non-coding (NR_126020, exon 3 of 8)	15915	285766	LOC285766	2.71146	1.34354e-06	TRUE	1.30526	0.182043	FALSE	3.59824	1.27186e-14	TRUE	-1.4062	0.00284314	TRUE	0.886774	0.0912758	FALSE	2.29297	1.90999e-10	TRUE
chr12_8648634_8648961	chr12	8648634	8648961	+	intron (NR_123733, intron 9 of 10)	14091	8076	MFAP5	3.16938	3.61296e-12	TRUE	2.65309	5.03911e-07	TRUE	3.59816	3.38208e-18	TRUE	-0.516291	0.226726	FALSE	0.428777	0.41351	FALSE	0.945068	0.00104411	FALSE
chr11_83583998_83584280	chr11	83583998	83584280	+	intron (NM_001351275, intron 17 of 25)	98286	1740	DLG2	2.23127	0.0153789	TRUE	1.98119	0.0986978	FALSE	3.59813	1.57799e-08	TRUE	-0.250079	0.854424	FALSE	1.36687	0.0515871	FALSE	1.61695	0.000267617	TRUE
chr10_94606986_94607511	chr10	94606986	94607511	+	Intergenic	61481	3070	HELLS	3.17373	1.06796e-08	TRUE	-0.429255	0.830034	FALSE	3.7145	3.85728e-14	TRUE	-3.60299	2.71501e-11	TRUE	0.540766	0.370542	FALSE	4.14375	4.20462e-18	TRUE
chr8_21182277_21182682	chr8	21182277	21182682	+	Intergenic	-115760	101929172	LOC101929172	3.17043	2.67042e-08	TRUE	2.22013	0.00404259	TRUE	3.12003	1.63619e-08	TRUE	-0.950301	0.0628276	FALSE	-0.050403	0.965864	FALSE	0.899898	0.0471142	FALSE
chr6_116666983_116667207	chr6	116666983	116667207	+	exon (NM_145062, exon 2 of 10)	1715	221302	ZUP1	3.16719	1.0563e-06	TRUE	-0.120031	0.963636	FALSE	3.80774	4.63747e-12	TRUE	-3.28722	5.32263e-08	TRUE	0.640548	0.299219	FALSE	3.92777	1.26731e-14	TRUE
chr11_128289236_128289506	chr11	128289236	128289506	+	Intergenic	80605	105369564	LINC02098	2.63548	3.35243e-06	TRUE	1.11798	0.290484	FALSE	3.59431	9.16805e-15	TRUE	-1.5175	0.00161185	TRUE	0.958832	0.0636065	FALSE	2.47633	1.24566e-11	TRUE
chr4_81522761_81523007	chr4	81522761	81523007	+	Intergenic	-50956	153020	RASGEF1B	3.132	0.000708108	TRUE	2.43359	0.0649641	FALSE	3.59374	5.79093e-06	TRUE	-0.69841	0.457455	FALSE	0.46174	0.66447	FALSE	1.16015	0.0400064	TRUE
chr18_5982361_5982671	chr18	5982361	5982671	+	intron (NM_001330559, intron 16 of 18)	-86562	645369	TMEM200C	3.16626	2.67634e-06	TRUE	-0.420569	0.865521	FALSE	3.27056	2.19285e-07	TRUE	-3.58683	4.65427e-08	TRUE	0.104296	0.92554	FALSE	3.69113	2.1526e-09	TRUE
chr2_136056350_136056590	chr2	136056350	136056590	+	Intergenic	59765	7852	CXCR4	2.60466	2.44451e-05	TRUE	2.42273	0.000782174	TRUE	3.58972	6.30677e-13	TRUE	-0.181929	0.846079	FALSE	0.98506	0.0774015	FALSE	1.16699	0.000921421	TRUE
chr12_48540157_48540798	chr12	48540157	48540798	+	Intergenic	14845	341568	OR8S1	3.16557	1.16958e-10	TRUE	0.856707	0.443413	FALSE	3.75478	9.34126e-18	TRUE	-2.30886	1.32391e-08	TRUE	0.589219	0.259219	FALSE	2.89808	6.51665e-16	TRUE
chr12_103499087_103499299	chr12	103499087	103499299	+	Intergenic	3153	105369945	LOC105369945	1.92304	0.0294077	TRUE	1.88857	0.0811608	FALSE	3.58914	1.37393e-09	TRUE	-0.0344682	0.98325	FALSE	1.6661	0.0125361	TRUE	1.70057	7.28581e-05	TRUE
chr2_73877430_73877730	chr2	73877430	73877730	+	Intergenic	-15386	72	ACTG2	3.16463	1.36656e-06	TRUE	0.841748	0.61129	FALSE	3.41065	1.21692e-08	TRUE	-2.32288	1.90456e-05	TRUE	0.246023	0.786969	FALSE	2.5689	1.32962e-07	TRUE
chr9_96782309_96782538	chr9	96782309	96782538	+	Intergenic	-4294	22869	ZNF510	3.16451	9.21583e-07	TRUE	-0.120624	0.963469	FALSE	3.55121	5.35775e-10	TRUE	-3.28513	4.33416e-08	TRUE	0.386698	0.599032	FALSE	3.67183	4.23803e-12	TRUE
chr14_51849231_51849423	chr14	51849231	51849423	+	Intergenic	-10977	54331	GNG2	2.67363	8.35178e-06	TRUE	1.88645	0.0268822	TRUE	3.5834	2.33642e-13	TRUE	-0.787182	0.164347	FALSE	0.90977	0.0947057	FALSE	1.69695	1.22502e-06	TRUE
chr10_69045579_69045858	chr10	69045579	69045858	+	Intergenic	-41728	5552	SRGN	3.49947	3.62107e-10	TRUE	1.44174	0.195986	FALSE	3.58307	1.53452e-11	TRUE	-2.05773	1.37414e-06	TRUE	0.0835956	0.926317	FALSE	2.14132	8.00136e-08	TRUE
chr8_47899884_47900220	chr8	47899884	47900220	+	intron (NM_001081640, intron 28 of 84)	60131	5591	PRKDC	3.24106	7.88638e-10	TRUE	0.531482	0.719076	FALSE	3.5818	1.84955e-13	TRUE	-2.70958	2.42896e-09	TRUE	0.340734	0.627984	FALSE	3.05031	2.75417e-13	TRUE
chr6_5813674_5814067	chr6	5813674	5814067	+	Intergenic	-118598	101927950	LOC101927950	3.6319	8.30579e-11	TRUE	-0.427032	0.847446	FALSE	3.57653	5.21371e-11	TRUE	-4.05893	7.53189e-14	TRUE	-0.055369	0.955689	FALSE	4.00356	4.1621e-14	TRUE
chr3_105827245_105827522	chr3	105827245	105827522	+	intron (NR_135811, intron 3 of 19)	40208	868	CBLB	3.76838	2.63659e-08	TRUE	1.49037	0.311175	FALSE	3.57604	1.06119e-07	TRUE	-2.27801	8.91822e-06	TRUE	-0.192336	0.849251	FALSE	2.08568	4.2144e-05	TRUE
chr3_188915173_188915390	chr3	188915173	188915390	+	Intergenic	32358	100874043	TPRG1-AS1	3.16205	1.51673e-07	TRUE	1.58515	0.136945	FALSE	3.91541	1.76738e-14	TRUE	-1.5769	0.000867327	TRUE	0.753357	0.18596	FALSE	2.33025	6.48213e-10	TRUE
chr18_58814407_58814790	chr18	58814407	58814790	+	intron (NR_146904, intron 1 of 2)	718	105372147	LINC01926	3.10012	2.51903e-07	TRUE	0.38579	0.842804	FALSE	3.57335	1.6464e-11	TRUE	-2.71433	2.27351e-07	TRUE	0.473229	0.476755	FALSE	3.18756	3.62022e-12	TRUE
chr7_39736055_39736425	chr7	39736055	39736425	+	intron (NR_026999, intron 1 of 11)	2672	349114	LINC00265	3.1577	8.09571e-09	TRUE	1.63506	0.0803263	FALSE	3.62492	9.83693e-14	TRUE	-1.52264	0.000326681	TRUE	0.46722	0.442337	FALSE	1.98986	2.62362e-08	TRUE
chr11_86230961_86231196	chr11	86230961	86231196	+	Intergenic	-13306	8726	EED	3.21877	1.31803e-05	TRUE	2.47059	0.0165669	TRUE	3.57226	5.21198e-08	TRUE	-0.748176	0.263183	FALSE	0.353497	0.693076	FALSE	1.10167	0.0158083	TRUE
chr1_235240987_235241283	chr1	235240987	235241283	+	intron (NM_031371, intron 7 of 22)	-51019	100616224	MIR4753	3.16713	9.75515e-07	TRUE	-0.805337	0.725874	FALSE	3.57196	4.29711e-10	TRUE	-3.97247	2.09965e-09	TRUE	0.404826	0.579107	FALSE	4.3773	7.31381e-14	TRUE
chr13_51738349_51738607	chr13	51738349	51738607	+	intron (NM_052950, intron 6 of 11)	65684	79758	DHRS12	2.84945	0.00084239	TRUE	2.79766	0.00513284	TRUE	3.57169	5.82001e-07	TRUE	-0.0517938	0.973207	FALSE	0.722238	0.439991	FALSE	0.774032	0.155199	FALSE
chr20_53767582_53767847	chr20	53767582	53767847	+	Intergenic	107995	391257	SUMO1P1	3.45269	7.95073e-07	TRUE	1.60169	0.249899	FALSE	3.57149	4.45271e-08	TRUE	-1.851	0.000491904	TRUE	0.118799	0.908673	FALSE	1.9698	4.07126e-05	TRUE
chr22_31661036_31661289	chr22	31661036	31661289	+	intron (NM_001326417, intron 1 of 9)	1402	23761	PISD	2.91026	2.12169e-05	TRUE	0.528851	0.789154	FALSE	3.56959	4.87169e-10	TRUE	-2.38141	6.00834e-05	TRUE	0.659326	0.326242	FALSE	3.04074	3.28102e-10	TRUE
chr4_48065593_48066081	chr4	48065593	48066081	+	TTS (NM_003328)	49065	152519	NIPAL1	3.15489	9.103e-09	TRUE	-0.0304397	0.988938	FALSE	3.52685	1.14758e-12	TRUE	-3.18533	3.33448e-10	TRUE	0.371955	0.575002	FALSE	3.55729	6.03618e-15	TRUE
chr6_42777540_42777730	chr6	42777540	42777730	+	intron (NM_001318819, intron 1 of 13)	-5861	401261	LOC401261	3.30279	3.77953e-06	TRUE	2.28137	0.0350746	TRUE	3.5686	3.06155e-08	TRUE	-1.02142	0.0735214	FALSE	0.265806	0.77065	FALSE	1.28723	0.00369549	TRUE
chr19_32690162_32690461	chr19	32690162	32690461	+	Intergenic	-1650	390916	NUDT19	2.46266	0.00455692	TRUE	1.8038	0.157388	FALSE	3.56807	2.46198e-08	TRUE	-0.658861	0.498346	FALSE	1.10541	0.116896	FALSE	1.76427	0.000105335	TRUE
chr1_234528636_234528850	chr1	234528636	234528850	+	non-coding (NR_038426, exon 3 of 3)	3036	100506795	LINC01354	2.46263	0.00455692	TRUE	2.28146	0.0343376	TRUE	3.56805	2.46198e-08	TRUE	-0.181168	0.890234	FALSE	1.10542	0.116896	FALSE	1.28659	0.00328417	TRUE
chr3_32992764_32993389	chr3	32992764	32993389	+	Intergenic	41502	1233	CCR4	3.14827	1.09165e-08	TRUE	1.63051	0.0822985	FALSE	3.70363	2.03887e-14	TRUE	-1.51776	0.000386332	TRUE	0.555357	0.339048	FALSE	2.07312	5.83255e-09	TRUE
chr5_133332639_133332926	chr5	133332639	133332926	+	intron (NM_015082, intron 4 of 15)	94924	100302134	MIR1289-2	3.14425	0.012254	TRUE	2.49195	0.1739	FALSE	4.23334	4.51636e-06	TRUE	-0.652305	0.64088	FALSE	1.08909	0.266614	FALSE	1.7414	0.00441544	TRUE
chr15_94239722_94240012	chr15	94239722	94240012	+	Intergenic	-58334	55784	MCTP2	2.99389	9.58242e-05	TRUE	1.23235	0.442871	FALSE	3.56668	3.2299e-08	TRUE	-1.76154	0.00542961	TRUE	0.57279	0.459326	FALSE	2.33433	2.22588e-06	TRUE
chr14_68663420_68663839	chr14	68663420	68663839	+	intron (NM_001321818, intron 10 of 10)	-34842	100996664	LOC100996664	3.03963	4.47077e-12	TRUE	1.6353	0.0179506	TRUE	3.56501	9.46422e-20	TRUE	-1.40433	3.21051e-05	TRUE	0.525376	0.25917	FALSE	1.92971	2.29895e-11	TRUE
chr2_39537246_39537475	chr2	39537246	39537475	+	intron (NR_037875, intron 5 of 5)	99944	728730	LOC728730	3.56122	3.78339e-07	TRUE	0.26874	0.919146	FALSE	3.56382	1.03623e-07	TRUE	-3.29248	9.96923e-08	TRUE	0.00260048	0.998256	FALSE	3.29508	2.42744e-08	TRUE
chr18_47163288_47163681	chr18	47163288	47163681	+	intron (NM_016097, intron 1 of 2)	12890	51124	IER3IP1	3.14307	3.83611e-13	TRUE	0.39178	0.76492	FALSE	3.44755	6.27892e-18	TRUE	-2.75129	2.3709e-13	TRUE	0.304475	0.580424	FALSE	3.05577	1.12542e-18	TRUE
chr9_65697876_65698338	chr9	65697876	65698338	+	intron (NM_001286835, intron 7 of 16)	22233	220869	CBWD5	3.13847	0.000671326	TRUE	1.76911	0.283141	FALSE	3.95337	9.09848e-08	TRUE	-1.36937	0.0829957	FALSE	0.814892	0.328358	FALSE	2.18426	4.05437e-05	TRUE
chrX_136021188_136021477	chrX	136021188	136021477	+	intron (NM_001042537, intron 10 of 15)	35905	10479	SLC9A6	3.53293	2.09023e-05	TRUE	0.810625	0.741373	FALSE	3.55741	5.60376e-06	TRUE	-2.7223	7.47152e-05	TRUE	0.0244835	0.985738	FALSE	2.74678	1.96458e-05	TRUE
chr6_113600693_113600947	chr6	113600693	113600947	+	Intergenic	49255	101927686	LINC02541	3.20574	0.000447183	TRUE	2.34168	0.0852756	FALSE	3.557	9.09728e-06	TRUE	-0.864064	0.313366	FALSE	0.351252	0.761557	FALSE	1.21532	0.0354879	TRUE
chr9_17165708_17166128	chr9	17165708	17166128	+	intron (NM_017738, intron 2 of 25)	30927	54875	CNTLN	4.22423	3.28941e-09	TRUE	1.06055	0.624415	FALSE	3.55687	5.50697e-06	TRUE	-3.16369	1.29446e-08	TRUE	-0.667362	0.356291	FALSE	2.49632	5.91997e-05	TRUE
chr16_87381071_87381228	chr16	87381071	87381228	+	intron (NM_001282683, intron 2 of 9)	2644	79791	FBXO31	3.26044	0.000226949	TRUE	1.62349	0.34539	FALSE	3.55595	5.69375e-06	TRUE	-1.63695	0.0225988	TRUE	0.295512	0.794115	FALSE	1.93246	0.000945194	TRUE
chr3_52459325_52459492	chr3	52459325	52459492	+	intron (NM_001276294, intron 3 of 13)	3900	11188	NISCH	2.38878	0.0279794	TRUE	0.508007	0.859262	FALSE	3.55569	4.86232e-06	TRUE	-1.88077	0.0800582	FALSE	1.16691	0.197662	FALSE	3.04768	4.44803e-06	TRUE
chr19_6616024_6616307	chr19	6616024	6616307	+	Intergenic	-25013	970	CD70	3.26127	0.000206176	TRUE	1.27335	0.519014	FALSE	3.55569	4.86232e-06	TRUE	-1.98792	0.00551636	TRUE	0.294426	0.792059	FALSE	2.28234	0.000143507	TRUE
chr15_51634592_51635039	chr15	51634592	51635039	+	Intergenic	-12045	23312	DMXL2	2.85096	0.00327425	TRUE	2.34222	0.0796179	FALSE	3.55568	4.86232e-06	TRUE	-0.508746	0.653464	FALSE	0.704711	0.453867	FALSE	1.21346	0.0262912	TRUE
chr22_33328856_33329057	chr22	33328856	33329057	+	intron (NM_133642, intron 10 of 14)	107713	100616295	MIR4764	3.48163	3.01947e-05	TRUE	1.06039	0.624029	FALSE	3.55566	4.86232e-06	TRUE	-2.42124	0.00032319	TRUE	0.0740307	0.955144	FALSE	2.49527	5.14865e-05	TRUE
chr16_68319325_68319558	chr16	68319325	68319558	+	intron (NR_147058, intron 3 of 18)	8327	54496	PRMT7	3.13747	0.000643316	TRUE	1.27332	0.521853	FALSE	4.36052	1.52458e-10	TRUE	-1.86415	0.0159742	TRUE	1.22305	0.0685802	FALSE	3.0872	2.03687e-09	TRUE
chr3_144294757_144294934	chr3	144294757	144294934	+	Intergenic	321520	205428	C3orf58	1.70466	0.195209	FALSE	-1.22781	0.699581	FALSE	3.55564	4.86232e-06	TRUE	-2.93247	0.0583559	FALSE	1.85098	0.0429047	TRUE	4.78345	1.79326e-08	TRUE
chr6_118485644_118485880	chr6	118485644	118485880	+	intron (NM_001178035, intron 7 of 13)	-15611	23629	BRD7P3	2.85094	0.00327425	TRUE	1.27332	0.519014	FALSE	3.55564	4.86232e-06	TRUE	-1.57761	0.0677968	FALSE	0.704703	0.453867	FALSE	2.28232	0.000143507	TRUE
chr4_8419481_8419929	chr4	8419481	8419929	+	intron (NM_001101667, intron 1 of 16)	21020	8310	ACOX3	3.13505	3.35498e-05	TRUE	0.92082	0.621597	FALSE	4.37819	1.43958e-14	TRUE	-2.21423	0.000435771	TRUE	1.24313	0.0203626	TRUE	3.45736	2.08197e-14	TRUE
chr1_67317937_67318118	chr1	67317937	67318118	+	intron (NM_001319233, intron 2 of 15)	10663	3595	IL12RB2	3.42958	4.92557e-05	TRUE	-0.398448	0.907578	FALSE	3.55562	4.86232e-06	TRUE	-3.82803	3.01e-06	TRUE	0.126042	0.917495	FALSE	3.95407	1.62839e-07	TRUE
chr4_102589868_102590029	chr4	102589868	102590029	+	intron (NM_001165412, intron 11 of 23)	-87462	105377621	LOC105377621	3.42957	4.92557e-05	TRUE	0.124838	0.970887	FALSE	3.55562	4.86232e-06	TRUE	-3.30473	1.54238e-05	TRUE	0.126056	0.917495	FALSE	3.43078	9.76947e-07	TRUE
chr12_68163496_68163945	chr12	68163496	68163945	+	Intergenic	-3979	3458	IFNG	3.13493	3.13123e-05	TRUE	1.48818	0.306435	FALSE	3.63423	2.15071e-08	TRUE	-1.64675	0.00673873	TRUE	0.4993	0.534174	FALSE	2.14605	8.96869e-06	TRUE
chr1_26790615_26790711	chr1	26790615	26790711	+	intron (NM_001202554, intron 1 of 3)	2475	55650	PIGV	2.38878	0.0279794	TRUE	0.810467	0.741156	FALSE	3.5556	4.86232e-06	TRUE	-1.57831	0.14485	FALSE	1.16683	0.197662	FALSE	2.74514	1.65308e-05	TRUE
chr2_68785143_68785314	chr2	68785143	68785314	+	intron (NM_001166277, intron 3 of 9)	10427	9938	ARHGAP25	3.1342	2.20943e-05	TRUE	0.521948	0.821228	FALSE	3.6855	3.95459e-09	TRUE	-2.61225	4.00195e-05	TRUE	0.5513	0.451082	FALSE	3.16355	1.92369e-09	TRUE
chr8_42961380_42961613	chr8	42961380	42961613	+	intron (NM_032410, intron 8 of 21)	64606	84376	HOOK3	3.13403	2.57704e-05	TRUE	1.0853	0.526687	FALSE	3.94307	5.84078e-11	TRUE	-2.04873	0.000756313	TRUE	0.809044	0.204751	FALSE	2.85777	8.59066e-10	TRUE
chr5_159163465_159163661	chr5	159163465	159163661	+	intron (NM_001199380, intron 8 of 10)	44085	153830	RNF145	2.59172	0.0120942	TRUE	1.62319	0.343887	FALSE	3.55559	4.86232e-06	TRUE	-0.968537	0.365471	FALSE	0.963865	0.2899	FALSE	1.9324	0.000820085	TRUE
chr10_120606207_120606601	chr10	120606207	120606601	+	Intergenic	8455	404216	LINC01561	3.13265	0.000681286	TRUE	-0.39858	0.907861	FALSE	3.4605	1.96618e-05	TRUE	-3.53123	9.32042e-05	TRUE	0.327851	0.784645	FALSE	3.85908	1.05383e-06	TRUE
chr5_66617537_66617749	chr5	66617537	66617749	+	intron (NM_198828, intron 1 of 5)	21295	375449	MAST4	2.5917	0.0120942	TRUE	1.45884	0.426226	FALSE	3.55557	4.86232e-06	TRUE	-1.13286	0.272141	FALSE	0.963871	0.2899	FALSE	2.09673	0.000359891	TRUE
chr12_12474965_12475237	chr12	12474965	12475237	+	3' UTR (NM_030640, exon 7 of 7)	87413	80824	DUSP16	2.92796	0.00208761	TRUE	2.81986	0.013552	TRUE	3.55557	4.86232e-06	TRUE	-0.108093	0.939103	FALSE	0.627611	0.508446	FALSE	0.735704	0.175316	FALSE
chr11_37450690_37450967	chr11	37450690	37450967	+	Intergenic	-487773	105376633	LOC105376633	3.26122	0.000206176	TRUE	0.810467	0.741156	FALSE	3.55553	4.86232e-06	TRUE	-2.45075	0.000949533	TRUE	0.294312	0.792157	FALSE	2.74507	1.65348e-05	TRUE
chr18_44054624_44054855	chr18	44054624	44054855	+	Intergenic	476958	101927921	LINC01478	2.85096	0.00327425	TRUE	1.45885	0.426226	FALSE	3.55553	4.86232e-06	TRUE	-1.39212	0.111339	FALSE	0.704569	0.453867	FALSE	2.09669	0.000359891	TRUE
chr1_116006676_116006954	chr1	116006676	116006954	+	intron (NM_018420, intron 2 of 11)	-29539	101928977	LOC101928977	3.13241	4.05019e-05	TRUE	1.97907	0.106903	FALSE	3.64022	3.48588e-08	TRUE	-1.15334	0.0727346	FALSE	0.507808	0.542475	FALSE	1.66115	0.000443801	TRUE
chr6_105493306_105493546	chr6	105493306	105493546	+	Intergenic	-90302	5550	PREP	3.131	2.00553e-06	TRUE	-2.15784	0.338915	FALSE	3.53632	1.43373e-09	TRUE	-5.28884	8.43333e-11	TRUE	0.405321	0.596942	FALSE	5.69416	3.2811e-15	TRUE
chr7_18461895_18462087	chr7	18461895	18462087	+	intron (NM_001204144, intron 3 of 12)	-33719	9734	HDAC9	3.13707	0.000531184	TRUE	1.62319	0.343933	FALSE	3.55545	4.91129e-06	TRUE	-1.51388	0.0453133	TRUE	0.418381	0.6874	FALSE	1.93226	0.000827145	TRUE
chr15_69410849_69410968	chr15	69410849	69410968	+	intron (NR_132969, intron 1 of 1)	-3338	9493	KIF23	3.07052	0.000847297	TRUE	0.507992	0.859262	FALSE	3.55537	4.95986e-06	TRUE	-2.56252	0.00167204	TRUE	0.484851	0.630621	FALSE	3.04738	4.57137e-06	TRUE
chr18_57524209_57524569	chr18	57524209	57524569	+	Intergenic	62348	2235	FECH	4.25411	1.53873e-09	TRUE	0.507908	0.859262	FALSE	3.55535	5.01061e-06	TRUE	-3.7462	3.0005e-10	TRUE	-0.698761	0.314151	FALSE	3.04744	4.63718e-06	TRUE
chr20_5593964_5594178	chr20	5593964	5594178	+	intron (NM_019593, intron 3 of 19)	16955	56261	GPCPD1	3.63463	1.52084e-05	TRUE	2.34676	0.086666	FALSE	3.55388	1.15785e-05	TRUE	-1.28787	0.0508271	FALSE	-0.0807543	0.953999	FALSE	1.20712	0.0408212	TRUE
chr6_16473263_16473464	chr6	16473263	16473464	+	intron (NM_000332, intron 7 of 8)	234783	2766	GMPR	2.76791	0.00545613	TRUE	1.62325	0.346333	FALSE	3.55332	6.3593e-06	TRUE	-1.14466	0.230888	FALSE	0.785403	0.411571	FALSE	1.93006	0.00103314	TRUE
chr18_3541792_3542117	chr18	3541792	3542117	+	intron (NM_001003809, intron 6 of 9)	-52160	649446	DLGAP1-AS1	3.13071	3.7007e-05	TRUE	1.70633	0.205324	FALSE	4.14223	4.42072e-12	TRUE	-1.42438	0.0213773	TRUE	1.01152	0.0976262	FALSE	2.4359	1.2169e-08	TRUE
chr10_84116649_84116937	chr10	84116649	84116937	+	Intergenic	-22636	27069	GHITM	3.13003	1.94926e-06	TRUE	1.09589	0.452138	FALSE	2.97101	4.1689e-06	TRUE	-2.03413	0.000132741	TRUE	-0.159015	0.882141	FALSE	1.87512	0.00032223	TRUE
chr13_99548422_99548851	chr13	99548422	99548851	+	intron (NM_004800, intron 11 of 16)	-28476	104355149	LINC01039	3.1279	3.07217e-07	TRUE	0.387002	0.843188	FALSE	3.83647	2.57937e-13	TRUE	-2.74089	3.07335e-07	TRUE	0.70857	0.241164	FALSE	3.44946	3.55601e-14	TRUE
chr2_207883107_207883380	chr2	207883107	207883380	+	intron (NM_001080475, intron 6 of 7)	-113824	7855	FZD5	3.1785	2.0847e-05	TRUE	0.521647	0.821946	FALSE	3.54529	8.33057e-08	TRUE	-2.65685	3.84587e-05	TRUE	0.366792	0.686144	FALSE	3.02364	7.32784e-08	TRUE
chr10_62839652_62839970	chr10	62839652	62839970	+	Intergenic	-20644	1959	EGR2	3.37098	4.40151e-06	TRUE	1.80292	0.169551	FALSE	3.54527	1.85125e-07	TRUE	-1.56806	0.00645196	TRUE	0.174295	0.874542	FALSE	1.74236	0.000535086	TRUE
chr2_202780555_202781148	chr2	202780555	202781148	+	intron (NM_001288622, intron 12 of 12)	48383	130026	ICA1L	3.1242	3.13547e-15	TRUE	0.836735	0.32361	FALSE	3.77618	1.38469e-26	TRUE	-2.28747	3.12271e-12	TRUE	0.651977	0.104206	FALSE	2.93944	5.28718e-24	TRUE
chr3_59726349_59726655	chr3	59726349	59726655	+	Intergenic	-68005	339902	LOC339902	3.22148	1.13855e-05	TRUE	0.271754	0.917729	FALSE	3.54134	6.45048e-08	TRUE	-2.94972	5.88768e-06	TRUE	0.319863	0.727388	FALSE	3.26958	1.32787e-08	TRUE
chr9_2466087_2466397	chr9	2466087	2466397	+	Intergenic	-155532	7436	VLDLR	2.6823	0.000352321	TRUE	-0.807512	0.728393	FALSE	3.54102	7.48396e-09	TRUE	-3.48982	6.3542e-06	TRUE	0.85872	0.244079	FALSE	4.34854	4.74521e-12	TRUE
chr21_39094391_39094719	chr21	39094391	39094719	+	Intergenic	88959	8624	PSMG1	3.55456	4.27651e-07	TRUE	3.75829	1.52917e-07	TRUE	3.53966	1.5434e-07	TRUE	0.203737	0.809599	FALSE	-0.014896	0.990304	FALSE	-0.218633	0.668669	FALSE
chr1_92584463_92584709	chr1	92584463	92584709	+	intron (NM_001350197, intron 18 of 19)	-97710	2672	GFI1	2.61468	0.000156972	TRUE	1.58538	0.145758	FALSE	3.53925	4.41923e-10	TRUE	-1.02931	0.116527	FALSE	0.924563	0.179413	FALSE	1.95387	6.29344e-06	TRUE
chr2_212815423_212815802	chr2	212815423	212815802	+	intron (NR_131941, intron 2 of 4)	20281	102725079	LINC01878	3.10422	9.24484e-06	TRUE	2.84181	0.000571488	TRUE	2.98036	1.28615e-05	TRUE	-0.262406	0.786144	FALSE	-0.123858	0.919702	FALSE	0.138548	0.834721	FALSE
chr2_130143227_130143435	chr2	130143227	130143435	+	intron (NM_207310, intron 1 of 7)	1803	91409	CCDC74B	3.10364	5.8175e-07	TRUE	0.664728	0.685874	FALSE	3.09668	2.12654e-07	TRUE	-2.43891	4.17506e-06	TRUE	-0.0069589	0.995022	FALSE	2.43195	1.61794e-06	TRUE
chr9_112249232_112249604	chr9	112249232	112249604	+	intron (NM_001244896, intron 6 of 12)	-74121	64420	SUSD1	3.09849	1.1154e-05	TRUE	0.526592	0.795807	FALSE	3.64486	4.52422e-09	TRUE	-2.5719	3.13868e-05	TRUE	0.546363	0.505983	FALSE	3.11826	5.68721e-09	TRUE
chr6_138411343_138411591	chr6	138411343	138411591	+	intron (NM_014320, intron 3 of 3)	7268	23593	HEBP2	2.14499	0.0226224	TRUE	1.8952	0.125773	FALSE	3.53718	3.9348e-08	TRUE	-0.249784	0.860037	FALSE	1.39219	0.053323	FALSE	1.64198	0.000310591	TRUE
chr1_91523410_91523782	chr1	91523410	91523782	+	intron (NM_001134419, intron 11 of 11)	22488	8317	CDC7	3.09694	6.12853e-08	TRUE	0.752998	0.590839	FALSE	3.16398	5.88333e-09	TRUE	-2.34394	1.1413e-06	TRUE	0.0670406	0.950358	FALSE	2.41098	1.12861e-07	TRUE
chr8_133046418_133046762	chr8	133046418	133046762	+	promoter-TSS (NR_107002)	-9	102466865	MIR7848	2.95609	1.66743e-08	TRUE	1.78293	0.022577	TRUE	3.53621	3.42235e-14	TRUE	-1.17316	0.00722641	TRUE	0.580124	0.336909	FALSE	1.75328	6.13258e-07	TRUE
chr3_106332884_106333188	chr3	106332884	106333188	+	Intergenic	-463614	868	CBLB	1.85075	0.0711562	FALSE	2.69166	0.00456816	TRUE	3.53609	5.43901e-08	TRUE	0.840909	0.308672	FALSE	1.68534	0.0201106	TRUE	0.84443	0.0598046	FALSE
chr4_14856246_14856797	chr4	14856246	14856797	+	intron (NR_126435, intron 2 of 6)	31648	201853	LINC00504	2.74672	9.03745e-10	TRUE	2.04832	0.00031252	TRUE	3.53369	5.52359e-20	TRUE	-0.698396	0.0850227	FALSE	0.78697	0.0692961	FALSE	1.48537	7.48719e-08	TRUE
chr3_12395414_12395936	chr3	12395414	12395936	+	intron (NM_001354669, intron 5 of 6)	44173	5468	PPARG	2.52181	0.000198862	TRUE	1.44206	0.195315	FALSE	3.53326	3.38631e-11	TRUE	-1.07975	0.0831026	FALSE	1.01145	0.0889434	FALSE	2.0912	1.72433e-07	TRUE
chr1_210352372_210352847	chr1	210352372	210352847	+	intron (NM_001122834, intron 2 of 11)	23313	55733	HHAT	3.1849	1.06235e-07	TRUE	0.0335135	0.988631	FALSE	3.53299	7.57511e-11	TRUE	-3.15138	8.41966e-09	TRUE	0.348094	0.645511	FALSE	3.49948	1.52499e-12	TRUE
chr15_99606072_99606314	chr15	99606072	99606314	+	intron (NM_001352615, intron 3 of 12)	-26785	4205	MEF2A	3.17694	2.47212e-05	TRUE	2.2834	0.038618	TRUE	3.52993	1.32303e-07	TRUE	-0.893546	0.178536	FALSE	0.352983	0.706834	FALSE	1.24653	0.00880831	TRUE
chr5_55364805_55365116	chr5	55364805	55365116	+	intron (NM_015360, intron 15 of 26)	57212	23517	MTREX	3.15017	1.10824e-10	TRUE	0.997316	0.335803	FALSE	3.52806	2.58206e-15	TRUE	-2.15285	5.83959e-08	TRUE	0.377896	0.525211	FALSE	2.53075	1.68306e-12	TRUE
chr1_246329886_246330250	chr1	246329886	246330250	+	intron (NM_022743, intron 4 of 11)	87344	64754	SMYD3	3.22333	2.67678e-09	TRUE	1.39692	0.172286	FALSE	3.52689	1.11903e-12	TRUE	-1.82641	1.5124e-05	TRUE	0.303555	0.664359	FALSE	2.12997	1.42762e-08	TRUE
chr2_38184931_38185364	chr2	38184931	38185364	+	Intergenic	54042	285154	CYP1B1-AS1	3.09303	4.48968e-12	TRUE	1.31233	0.0825132	FALSE	3.0798	1.38534e-12	TRUE	-1.7807	1.18728e-06	TRUE	-0.0132334	0.988798	FALSE	1.76746	5.59972e-07	TRUE
chr1_161962458_161962844	chr1	161962458	161962844	+	3' UTR (NM_007348, exon 16 of 16)	61814	25903	OLFML2B	3.28595	5.78036e-12	TRUE	0.240061	0.886599	FALSE	3.52626	2.58206e-15	TRUE	-3.04589	6.68821e-13	TRUE	0.240302	0.723585	FALSE	3.2862	9.71212e-17	TRUE
chr4_184281527_184281688	chr4	184281527	184281688	+	Intergenic	-63646	133121	ENPP6	3.27955	4.95488e-05	TRUE	1.90562	0.153633	FALSE	3.5249	1.81632e-06	TRUE	-1.37393	0.049746	TRUE	0.245348	0.846417	FALSE	1.61928	0.004782	TRUE
chr9_129956722_129957105	chr9	129956722	129957105	+	intron (NM_015033, intron 6 of 16)	86281	23048	FNBP1	3.57317	2.25076e-10	TRUE	0.0344974	0.988456	FALSE	3.52388	1.25532e-10	TRUE	-3.53867	5.90112e-12	TRUE	-0.0492938	0.961721	FALSE	3.48938	2.89482e-12	TRUE
chrX_72621511_72621980	chrX	72621511	72621980	+	intron (NM_001122670, intron 18 of 30)	-48642	55869	HDAC8	2.49925	0.000895405	TRUE	0.343997	0.877669	FALSE	3.52303	1.08906e-09	TRUE	-2.15526	0.00172597	TRUE	1.02377	0.111869	FALSE	3.17903	2.2264e-10	TRUE
chr1_8946472_8946818	chr1	8946472	8946818	+	intron (NM_001270502, intron 1 of 5)	811	765	CA6	-0.158774	0.960681	FALSE	5.43281	5.31356e-12	TRUE	3.52111	0.00111551	TRUE	5.59159	2.15726e-14	TRUE	3.67989	0.0243192	TRUE	-1.9117	3.15509e-06	TRUE
chr16_29266594_29267039	chr16	29266594	29267039	+	Intergenic	-35471	440352	SNX29P2	2.63317	0.000163443	TRUE	2.46836	0.00301335	TRUE	3.51949	1.39385e-09	TRUE	-0.164813	0.88532	FALSE	0.886319	0.218234	FALSE	1.05113	0.0165066	TRUE
chr11_86806011_86806458	chr11	86806011	86806458	+	intron (NR_120591, intron 1 of 4)	5994	11098	PRSS23	3.09254	1.86472e-10	TRUE	0.92568	0.384777	FALSE	3.68227	8.222e-18	TRUE	-2.16686	4.50344e-08	TRUE	0.58973	0.23745	FALSE	2.75659	1.38724e-15	TRUE
chr21_31354605_31355216	chr21	31354605	31355216	+	intron (NM_001353690, intron 1 of 27)	-10556	7074	TIAM1	1.97951	0.000261384	TRUE	2.72533	2.75197e-08	TRUE	3.51691	7.33251e-19	TRUE	0.745818	0.0746827	FALSE	1.5374	0.000246239	TRUE	0.791578	0.00463815	FALSE
chr17_2906873_2907163	chr17	2906873	2907163	+	intron (NM_001100398, intron 3 of 23)	58877	101927911	LOC101927911	3.12495	3.12815e-06	TRUE	0.129256	0.959018	FALSE	3.51558	4.02429e-09	TRUE	-2.99569	8.08208e-07	TRUE	0.390635	0.631822	FALSE	3.38632	2.9199e-10	TRUE
chr2_69054518_69054745	chr2	69054518	69054745	+	intron (NM_053034, intron 3 of 14)	41487	84168	ANTXR1	2.99206	0.00012596	TRUE	1.48968	0.306781	FALSE	3.51425	1.36953e-07	TRUE	-1.50237	0.0212335	TRUE	0.52219	0.537123	FALSE	2.02456	5.45594e-05	TRUE
chr20_1357873_1358239	chr20	1357873	1358239	+	intron (NR_040047, intron 1 of 2)	-28821	27111	SDCBP2	3.09239	5.85854e-05	TRUE	1.3665	0.374543	FALSE	4.15199	5.53199e-12	TRUE	-1.7259	0.00636582	TRUE	1.0596	0.0848433	FALSE	2.7855	7.23716e-10	TRUE
chr2_85003973_85004176	chr2	85003973	85004176	+	intron (NM_020122, intron 1 of 6)	32966	56888	KCMF1	2.66277	0.00145713	TRUE	1.48983	0.304874	FALSE	3.51231	1.0557e-07	TRUE	-1.17294	0.129113	FALSE	0.849542	0.271523	FALSE	2.02248	4.31089e-05	TRUE
chr6_26170357_26170529	chr6	26170357	26170529	+	intron (NM_138720, intron 1 of 1)	12322	3017	HIST1H2BD	3.43581	7.58288e-05	TRUE	2.34238	0.0852614	FALSE	3.51115	1.42694e-05	TRUE	-1.09343	0.131158	FALSE	0.0753374	0.957697	FALSE	1.16877	0.0465798	TRUE
chr11_17244027_17244439	chr11	17244027	17244439	+	Intergenic	-32481	4925	NUCB2	3.52111	1.02474e-11	TRUE	1.33056	0.207819	FALSE	3.51106	2.33904e-12	TRUE	-2.19055	4.25948e-08	TRUE	-0.0100468	0.991332	FALSE	2.1805	1.33076e-08	TRUE
chr2_231278023_231278278	chr2	231278023	231278278	+	intron (NR_148040, intron 15 of 21)	79537	80210	ARMC9	2.15224	0.0632465	FALSE	1.27334	0.519407	FALSE	3.51052	8.15643e-06	TRUE	-0.878905	0.520997	FALSE	1.35828	0.144554	FALSE	2.23718	0.00024403	TRUE
chr20_5760676_5760961	chr20	5760676	5760961	+	intron (NM_152504, intron 1 of 2)	10431	149840	SHLD1	3.08885	3.45537e-05	TRUE	0.521983	0.821134	FALSE	3.56804	2.46198e-08	TRUE	-2.56687	6.58444e-05	TRUE	0.479182	0.539881	FALSE	3.04605	1.63187e-08	TRUE
chr6_148591666_148591966	chr6	148591666	148591966	+	Intergenic	82665	23328	SASH1	3.08873	3.98359e-05	TRUE	0.735694	0.719118	FALSE	3.47359	1.33448e-07	TRUE	-2.35304	0.000216406	TRUE	0.384856	0.663292	FALSE	2.73789	4.33549e-07	TRUE
chr16_3187823_3187986	chr16	3187823	3187986	+	Intergenic	-16343	4992	OR1F1	2.49385	0.0185247	TRUE	2.60073	0.0337454	TRUE	3.51021	7.80597e-06	TRUE	0.106877	0.947318	FALSE	1.01635	0.271783	FALSE	0.909476	0.0987827	FALSE
chr17_63515077_63515293	chr17	63515077	63515293	+	Intergenic	-8149	81033	KCNH6	3.26124	0.000206176	TRUE	1.45885	0.426226	FALSE	3.51016	7.80796e-06	TRUE	-1.80238	0.0112113	TRUE	0.24892	0.829227	FALSE	2.0513	0.000572496	TRUE
chr1_168576285_168576513	chr1	168576285	168576513	+	promoter-TSS (NM_002995)	-74	6375	XCL1	3.13702	0.000529455	TRUE	0.507995	0.859262	FALSE	3.51012	7.80873e-06	TRUE	-2.62902	0.000956772	TRUE	0.3731	0.733049	FALSE	3.00212	7.80295e-06	TRUE
chr17_32323986_32324228	chr17	32323986	32324228	+	3' UTR (NM_001330181, exon 8 of 8)	18102	64149	C17orf75	3.71645	2.90314e-06	TRUE	2.5197	0.0455851	TRUE	3.51011	8.51085e-06	TRUE	-1.19675	0.0425731	TRUE	-0.206345	0.85432	FALSE	0.990403	0.0749639	FALSE
chr12_21871_22221	chr12	21871	22221	+	intron (NR_130745, intron 2 of 10).2	9969	100288778	LOC100288778	3.08629	4.83746e-05	TRUE	1.98053	0.102979	FALSE	3.40892	4.4585e-07	TRUE	-1.10576	0.0843348	FALSE	0.322625	0.741146	FALSE	1.42839	0.00351804	TRUE
chr16_84752045_84752297	chr16	84752045	84752297	+	intron (NR_073578, intron 3 of 10)	52222	9100	USP10	3.086	6.61915e-06	TRUE	0.837841	0.617638	FALSE	3.53866	5.19899e-09	TRUE	-2.24816	9.60741e-05	TRUE	0.452661	0.577244	FALSE	2.70082	5.29509e-08	TRUE
chr3_188689289_188689574	chr3	188689289	188689574	+	TTS (NR_029502)	650	407020	MIR28	3.08272	6.26006e-05	TRUE	0.919113	0.623715	FALSE	4.00575	8.29825e-11	TRUE	-2.16361	0.000826435	TRUE	0.923029	0.165299	FALSE	3.08664	3.82898e-10	TRUE
chr6_154773826_154774104	chr6	154773826	154774104	+	intron (NM_001286189, intron 3 of 21)	40587	22828	SCAF8	3.08949	4.67241e-05	TRUE	1.48887	0.305638	FALSE	3.50836	1.15813e-07	TRUE	-1.60061	0.00948464	TRUE	0.418878	0.633005	FALSE	2.01949	4.67336e-05	TRUE
chr5_158679145_158679426	chr5	158679145	158679426	+	Intergenic	-269512	101927697	LINC02227	3.30254	3.79315e-06	TRUE	0.734394	0.719488	FALSE	3.50636	7.65357e-08	TRUE	-2.56814	1.58171e-05	TRUE	0.203819	0.83398	FALSE	2.77196	2.19739e-07	TRUE
chr11_67487785_67487959	chr11	67487785	67487959	+	intron (NM_001302959, intron 2 of 5)	-2373	102465450	MIR6752	1.8504	0.0703301	FALSE	1.60145	0.246166	FALSE	3.50509	6.72184e-08	TRUE	-0.24895	0.87724	FALSE	1.65469	0.0222071	TRUE	1.90364	6.12217e-05	TRUE
chr8_128070117_128070583	chr8	128070117	128070583	+	intron (NR_003367, intron 6 of 8)	21198	100302175	MIR1207	3.0808	8.04099e-14	TRUE	1.03676	0.196734	FALSE	3.59669	5.2817e-22	TRUE	-2.04404	9.11342e-10	TRUE	0.515894	0.255746	FALSE	2.55993	9.65046e-18	TRUE
chr1_93711122_93711447	chr1	93711122	93711447	+	intron (NM_001261408, intron 2 of 13)	-29446	8412	BCAR3	3.07891	1.46973e-06	TRUE	-0.426322	0.848761	FALSE	3.58682	3.32388e-10	TRUE	-3.50523	1.9315e-08	TRUE	0.507909	0.507279	FALSE	4.01314	6.04818e-13	TRUE
chr1_8649021_8649347	chr1	8649021	8649347	+	intron (NM_001042681, intron 2 of 22)	-154271	106632271	SNORD128	2.90989	2.03256e-05	TRUE	1.4124	0.267081	FALSE	3.5017	1.46113e-09	TRUE	-1.49748	0.00765376	TRUE	0.591809	0.396336	FALSE	2.08929	1.42075e-06	TRUE
chr17_27472243_27472486	chr17	27472243	27472486	+	intron (NM_014238, intron 1 of 20)	354	8844	KSR1	2.5222	0.000171587	TRUE	1.58263	0.131265	FALSE	3.49705	3.59894e-11	TRUE	-0.939574	0.136562	FALSE	0.974843	0.098022	FALSE	1.91442	8.04829e-07	TRUE
chr11_33722661_33722823	chr11	33722661	33722823	+	promoter-TSS (NM_001127223)	-15	966	CD59	1.95403	0.0545722	FALSE	0.919953	0.624815	FALSE	3.49701	3.74852e-07	TRUE	-1.03407	0.372593	FALSE	1.54299	0.0590868	FALSE	2.57706	4.25522e-06	TRUE
chr19_42352548_42352890	chr19	42352548	42352890	+	intron (NM_001271938, intron 19 of 41)	1588	102465875	MIR8077	2.78268	2.15333e-05	TRUE	2.13561	0.0161209	TRUE	3.49686	3.08266e-10	TRUE	-0.647066	0.339597	FALSE	0.714178	0.29485	FALSE	1.36124	0.000748441	TRUE
chr2_24314118_24314305	chr2	24314118	24314305	+	intron (NM_019595, intron 3 of 38)	46317	50618	ITSN2	3.2598	1.29091e-05	TRUE	-0.0298179	0.992278	FALSE	3.48862	3.0205e-07	TRUE	-3.28962	1.99438e-06	TRUE	0.228819	0.827545	FALSE	3.51844	2.10523e-08	TRUE
chr10_114624848_114625444	chr10	114624848	114625444	+	intron (NM_001322885, intron 1 of 20)	7251	3983	ABLIM1	3.07877	4.37888e-06	TRUE	1.76507	0.097992	FALSE	3.75768	1.91626e-10	TRUE	-1.3137	0.0242645	TRUE	0.678901	0.38243	FALSE	1.9926	1.12987e-05	TRUE
chr11_74072350_74072592	chr11	74072350	74072592	+	intron (NM_001286577, intron 24 of 32)	-63234	7352	UCP3	3.21484	2.36405e-05	TRUE	-0.414003	0.885238	FALSE	3.48351	4.18122e-07	TRUE	-3.62885	9.88509e-07	TRUE	0.268661	0.798851	FALSE	3.89751	6.11921e-09	TRUE
chr11_35337264_35337517	chr11	35337264	35337517	+	intron (NM_001195728, intron 1 of 11)	82168	6506	SLC1A2	2.53541	0.00347405	TRUE	1.36609	0.372972	FALSE	3.48075	2.12654e-07	TRUE	-1.16932	0.160145	FALSE	0.945337	0.232263	FALSE	2.11465	3.70151e-05	TRUE
chr5_32283690_32284039	chr5	32283690	32284039	+	intron (NM_001040446, intron 1 of 15)	29144	54545	MTMR12	3.11608	1.98037e-09	TRUE	1.18075	0.252154	FALSE	3.47881	1.86765e-13	TRUE	-1.93534	3.19749e-06	TRUE	0.362729	0.575094	FALSE	2.29807	5.47065e-10	TRUE
chr22_43376914_43377179	chr22	43376914	43377179	+	Intergenic	-23285	105373054	LINC01639	3.13187	1.44142e-06	TRUE	0.694251	0.698429	FALSE	3.47838	2.039e-09	TRUE	-2.43762	7.90399e-06	TRUE	0.346512	0.658168	FALSE	2.78413	5.98035e-09	TRUE
chr15_67027973_67028200	chr15	67027973	67028200	+	intron (NR_135686, intron 2 of 5)	36096	102723493	LOC102723493	2.31241	0.0111621	TRUE	2.34608	0.0283576	TRUE	3.47735	1.75515e-07	TRUE	0.0336643	0.983022	FALSE	1.16494	0.129187	FALSE	1.13128	0.0161534	TRUE
chr8_93803301_93803941	chr8	93803301	93803941	+	exon (NM_153704, exon 22 of 28)	48777	91147	TMEM67	3.47412	1.98025e-14	TRUE	1.73517	0.0226268	TRUE	3.47651	2.20978e-15	TRUE	-1.73896	2.00271e-07	TRUE	0.00238441	0.99763	FALSE	1.74134	5.194e-08	TRUE
chr7_94649619_94649888	chr7	94649619	94649888	+	intron (NM_001346719, intron 1 of 12)	6456	8910	SGCE	3.07579	1.58231e-07	TRUE	0.789504	0.594535	FALSE	2.95713	2.4413e-07	TRUE	-2.28629	2.28928e-06	TRUE	-0.118665	0.899775	FALSE	2.16763	4.39234e-06	TRUE
chr16_88240088_88240403	chr16	88240088	88240403	+	Intergenic	45964	101928880	LINC02182	2.61032	0.000707197	TRUE	2.19291	0.0288063	TRUE	3.475	3.16838e-08	TRUE	-0.417407	0.677883	FALSE	0.864679	0.266413	FALSE	1.28209	0.00607004	TRUE
chr9_79631087_79631356	chr9	79631087	79631356	+	intron (NM_001282753, intron 6 of 17)	58048	7091	TLE4	3.0714	9.85404e-08	TRUE	1.69034	0.0713731	FALSE	3.34659	2.94106e-10	TRUE	-1.38105	0.00301304	TRUE	0.275195	0.742561	FALSE	1.65625	3.83976e-05	TRUE
chrX_76064819_76065217	chrX	76064819	76065217	+	Intergenic	-107911	51260	PBDC1	3.08721	4.41466e-05	TRUE	1.36648	0.369743	FALSE	3.47425	1.57938e-07	TRUE	-1.72072	0.00506	TRUE	0.387045	0.665268	FALSE	2.10777	2.81767e-05	TRUE
chr10_72703250_72703474	chr10	72703250	72703474	+	intron (NM_001270680, intron 1 of 7)	10743	90550	MCU	3.07066	0.000840692	TRUE	1.27332	0.519014	FALSE	3.55564	4.86232e-06	TRUE	-1.79734	0.0205807	TRUE	0.484984	0.629679	FALSE	2.28232	0.000143507	TRUE
chr1_236122234_236122467	chr1	236122234	236122467	+	Intergenic	-20182	7107	GPR137B	2.59859	0.00196187	TRUE	-0.93686	0.721738	FALSE	3.4735	1.0005e-07	TRUE	-3.53545	6.49687e-05	TRUE	0.874906	0.242784	FALSE	4.41036	1.04369e-10	TRUE
chr12_11732855_11733148	chr12	11732855	11733148	+	intron (NM_001987, intron 1 of 7)	83147	2120	ETV6	3.31202	3.54148e-09	TRUE	-0.0314778	0.988668	FALSE	3.47194	5.15925e-11	TRUE	-3.3435	1.2593e-10	TRUE	0.159923	0.860701	FALSE	3.50342	8.12835e-13	TRUE
chr17_78719814_78719963	chr17	78719814	78719963	+	intron (NM_004762, intron 1 of 12)	-2856	9267	CYTH1	3.07061	0.000840692	TRUE	0.507979	0.859262	FALSE	3.51021	7.80597e-06	TRUE	-2.56263	0.00165623	TRUE	0.439599	0.675193	FALSE	3.00223	7.80295e-06	TRUE
chrX_24683131_24683437	chrX	24683131	24683437	+	Intergenic	-10422	9468	PCYT1B	2.74866	0.000152546	TRUE	0.84353	0.612622	FALSE	3.46837	8.88129e-09	TRUE	-1.90513	0.00253733	TRUE	0.719712	0.330756	FALSE	2.62484	9.89246e-08	TRUE
chr1_209039383_209039701	chr1	209039383	209039701	+	Intergenic	67088	105372894	LINC01774	3.06953	0.00111964	TRUE	0.505372	0.860576	FALSE	4.31941	6.45988e-10	TRUE	-2.56416	0.00230362	TRUE	1.24989	0.0767455	FALSE	3.81404	1.18618e-10	TRUE
chr3_186706247_186706530	chr3	186706247	186706530	+	Intergenic	-10921	3827	KNG1	3.06105	5.59346e-06	TRUE	2.39506	0.00825359	TRUE	2.62434	0.000166151	TRUE	-0.665992	0.302821	FALSE	-0.436713	0.636745	FALSE	0.229279	0.720358	FALSE
chr13_45474982_45475238	chr13	45474982	45475238	+	intron (NM_031431, intron 1 of 22)	10215	83548	COG3	3.37764	9.5136e-05	TRUE	0.50774	0.85959	FALSE	3.46419	1.59537e-05	TRUE	-2.8699	0.00013074	TRUE	0.0865489	0.950358	FALSE	2.95645	1.84008e-05	TRUE
chr1_182147280_182147477	chr1	182147280	182147477	+	Intergenic	-85666	127665	ZNF648	2.49388	0.0187706	TRUE	1.77034	0.278726	FALSE	3.46338	1.35886e-05	TRUE	-0.723542	0.553176	FALSE	0.969496	0.312157	FALSE	1.69304	0.00404041	TRUE
chr7_130822693_130822996	chr7	130822693	130822996	+	Intergenic	53966	407021	MIR29A	3.00108	0.001325	TRUE	0.124816	0.970887	FALSE	3.4633	1.25989e-05	TRUE	-2.87626	0.000893964	TRUE	0.462224	0.663195	FALSE	3.33848	3.17489e-06	TRUE
chr12_91902862_91903101	chr12	91902862	91903101	+	Intergenic	238732	256021	LINC01619	2.15253	0.0628985	FALSE	1.27331	0.519014	FALSE	3.4633	1.25989e-05	TRUE	-0.879218	0.519823	FALSE	1.31077	0.165299	FALSE	2.18999	0.000378912	TRUE
chr14_75566458_75566672	chr14	75566458	75566672	+	Intergenic	-12032	55640	FLVCR2	2.85098	0.00327425	TRUE	2.81986	0.013552	TRUE	3.4633	1.25989e-05	TRUE	-0.0311133	0.98412	FALSE	0.612323	0.539411	FALSE	0.643436	0.255975	FALSE
chr20_33652586_33652779	chr20	33652586	33652779	+	Intergenic	-9604	128864	C20orf144	3.00105	0.001325	TRUE	1.90458	0.22012	FALSE	3.4633	1.25989e-05	TRUE	-1.09647	0.193494	FALSE	0.462252	0.663195	FALSE	1.55873	0.00707619	TRUE
chr4_77629895_77630257	chr4	77629895	77630257	+	Intergenic	118323	10563	CXCL13	3.0465	3.56418e-07	TRUE	0.667021	0.678855	FALSE	3.30704	1.30655e-09	TRUE	-2.37948	2.34436e-06	TRUE	0.260544	0.7493	FALSE	2.64002	5.61999e-09	TRUE
chr19_52691831_52692063	chr19	52691831	52692063	+	Intergenic	-1366	55769	ZNF83	3.04517	9.48872e-05	TRUE	1.367	0.375218	FALSE	3.38865	9.93571e-07	TRUE	-1.67817	0.00965222	TRUE	0.343484	0.737628	FALSE	2.02166	0.000163596	TRUE
chr3_17151548_17152142	chr3	17151548	17152142	+	Intergenic	218649	100500913	MIR3714	3.04439	8.57718e-11	TRUE	3.30838	2.44623e-12	TRUE	3.76465	1.76815e-19	TRUE	0.263992	0.655456	FALSE	0.720259	0.151609	FALSE	0.456267	0.165777	FALSE
chr7_27890252_27890517	chr7	27890252	27890517	+	intron (NM_175061, intron 3 of 4)	150289	8887	TAX1BP1	3.04193	5.50695e-05	TRUE	-0.936866	0.721738	FALSE	3.37221	4.08006e-07	TRUE	-3.97879	4.67412e-07	TRUE	0.330285	0.724846	FALSE	4.30908	6.64803e-10	TRUE
chr8_93954627_93954853	chr8	93954627	93954853	+	Intergenic	37689	54704	PDP1	2.591	0.0123547	TRUE	1.06	0.624415	FALSE	3.46293	1.37237e-05	TRUE	-1.531	0.121117	FALSE	0.871929	0.369941	FALSE	2.40293	0.000156033	TRUE
chr12_26867136_26867449	chr12	26867136	26867449	+	Intergenic	-34094	3709	ITPR2	2.91207	5.81724e-08	TRUE	1.36272	0.152645	FALSE	3.46243	2.08288e-13	TRUE	-1.54935	0.000334917	TRUE	0.550364	0.349436	FALSE	2.09971	5.83631e-09	TRUE
chr5_139447381_139447670	chr5	139447381	139447670	+	Intergenic	-8000	202052	DNAJC18	2.60911	0.00308184	TRUE	1.97905	0.115103	FALSE	3.46149	1.01274e-06	TRUE	-0.63006	0.540255	FALSE	0.85238	0.342254	FALSE	1.48244	0.00526877	TRUE
chr5_6829439_6829764	chr5	6829439	6829764	+	Intergenic	-1680	100422999	MIR4278	2.2203	0.00123174	TRUE	1.26172	0.257106	FALSE	3.46094	6.7244e-11	TRUE	-0.95858	0.171218	FALSE	1.24064	0.0448048	TRUE	2.19922	1.45049e-07	TRUE
chr2_118249607_118249837	chr2	118249607	118249837	+	Intergenic	-63336	100506797	LOC100506797	3.04188	5.50695e-05	TRUE	0.734906	0.71886	FALSE	3.10401	1.01628e-05	TRUE	-2.30697	0.000301654	TRUE	0.0621258	0.961489	FALSE	2.3691	5.31089e-05	TRUE
chr14_49858503_49858637	chr14	49858503	49858637	+	Intergenic	4279	378706	RN7SL2	3.04096	6.26161e-05	TRUE	1.48821	0.303477	FALSE	3.59736	2.17687e-08	TRUE	-1.55274	0.0122534	TRUE	0.556408	0.470203	FALSE	2.10915	9.19121e-06	TRUE
chr15_50879111_50879389	chr15	50879111	50879389	+	Intergenic	-29422	23431	AP4E1	3.03995	1.59216e-06	TRUE	0.905885	0.529585	FALSE	3.71904	1.06124e-11	TRUE	-2.13407	6.05981e-05	TRUE	0.679085	0.308603	FALSE	2.81315	2.93018e-10	TRUE
chr5_146239025_146239254	chr5	146239025	146239254	+	intron (NM_018989, intron 8 of 20)	35539	54439	RBM27	2.71296	0.0013039	TRUE	0.730937	0.724781	FALSE	3.45892	4.95892e-07	TRUE	-1.98202	0.00873838	TRUE	0.745965	0.384233	FALSE	2.72798	1.88157e-06	TRUE
chr12_68157376_68157738	chr12	68157376	68157738	+	intron (NM_000619, intron 3 of 3)	2184	3458	IFNG	2.92039	4.26403e-06	TRUE	1.77252	0.0764024	FALSE	3.45659	4.71253e-10	TRUE	-1.14787	0.0337081	TRUE	0.536196	0.453867	FALSE	1.68407	4.12837e-05	TRUE
chr5_132684964_132685339	chr5	132684964	132685339	+	Intergenic	-2522	105379176	LOC105379176	3.43949	1.69581e-08	TRUE	1.31492	0.318645	FALSE	3.45197	3.18283e-09	TRUE	-2.12457	5.72303e-06	TRUE	0.012484	0.99073	FALSE	2.13706	1.34577e-06	TRUE
chr6_16741076_16741401	chr6	16741076	16741401	+	intron (NR_152112, intron 1 of 1)	18893	6310	ATXN1	2.74489	0.000183104	TRUE	1.8182	0.103689	FALSE	3.4486	1.96512e-08	TRUE	-0.926689	0.183578	FALSE	0.703717	0.362706	FALSE	1.63041	0.000353221	TRUE
chr1_15352601_15352797	chr1	15352601	15352797	+	intron (NM_052929, intron 18 of 30)	-8816	101927417	LOC101927417	1.95309	0.0516445	FALSE	1.48903	0.306857	FALSE	3.44834	3.20377e-07	TRUE	-0.464061	0.738786	FALSE	1.49524	0.0590868	FALSE	1.9593	0.000121313	TRUE
chr14_102182316_102182555	chr14	102182316	102182555	+	intron (NM_001353659, intron 1 of 1)	42583	91833	WDR20	3.03825	1.23297e-06	TRUE	0.387113	0.843778	FALSE	3.72463	4.8354e-12	TRUE	-2.65113	1.58191e-06	TRUE	0.686384	0.285981	FALSE	3.33752	1.09431e-12	TRUE
chr9_120844676_120844955	chr9	120844676	120844955	+	non-coding (NR_152406, exon 1 of 4)	1740	253039	CUTALP	3.0266	4.75258e-06	TRUE	0.130839	0.957909	FALSE	3.26875	5.21012e-08	TRUE	-2.89576	1.26651e-06	TRUE	0.242153	0.791072	FALSE	3.13791	5.77626e-09	TRUE
chr8_42177595_42177974	chr8	42177595	42177974	+	intron (NM_033011, intron 12 of 12)	24838	10947	AP3M2	3.08309	2.96678e-11	TRUE	1.48637	0.057577	FALSE	3.44698	4.45784e-16	TRUE	-1.59672	9.77572e-06	TRUE	0.36389	0.521735	FALSE	1.96061	9.43865e-10	TRUE
chr2_160322344_160322664	chr2	160322344	160322664	+	intron (NM_016836, intron 2 of 13)	-50609	100505984	LINC02478	3.21846	6.00182e-08	TRUE	0.386351	0.842849	FALSE	3.44673	3.23749e-10	TRUE	-2.83211	4.37425e-08	TRUE	0.228263	0.789733	FALSE	3.06038	1.2594e-10	TRUE
chr1_119324315_119324509	chr1	119324315	119324509	+	Intergenic	-3840	105378934	LINC01780	3.02638	3.91272e-06	TRUE	0.69318	0.697923	FALSE	2.71218	4.46358e-05	TRUE	-2.3332	2.31925e-05	TRUE	-0.314198	0.737746	FALSE	2.019	0.000358879	TRUE
chr8_98531977_98532311	chr8	98531977	98532311	+	intron (NM_001256312, intron 11 of 12)	105122	3788	KCNS2	3.02603	4.69722e-06	TRUE	-0.805729	0.725147	FALSE	3.37675	9.00856e-09	TRUE	-3.83176	1.57754e-08	TRUE	0.350717	0.661903	FALSE	4.18248	4.02601e-12	TRUE
chr13_50428477_50428777	chr13	50428477	50428777	+	intron (NR_109974, intron 3 of 6)	98822	103689915	DLEU1-AS1	2.74151	0.00014709	TRUE	2.94275	0.00010878	TRUE	3.44477	9.09891e-09	TRUE	0.201233	0.834718	FALSE	0.703255	0.337514	FALSE	0.502022	0.25974	FALSE
chr17_57902663_57902869	chr17	57902663	57902869	+	intron (NM_001271875, intron 1 of 10)	623	404093	CUEDC1	2.99569	0.00010872	TRUE	1.4887	0.305276	FALSE	3.44328	2.64342e-07	TRUE	-1.50699	0.018915	TRUE	0.447591	0.612657	FALSE	1.95458	0.000101391	TRUE
chr6_18513328_18513773	chr6	18513328	18513773	+	Intergenic	-9197	105374956	MIR548A1HG	3.02587	4.71131e-06	TRUE	1.31452	0.317626	FALSE	2.97964	2.64809e-06	TRUE	-1.71135	0.00123888	TRUE	-0.0462265	0.969542	FALSE	1.66513	0.000825509	TRUE
chr14_68840518_68840755	chr14	68840518	68840755	+	Intergenic	-44393	677	ZFP36L1	3.15959	7.33139e-08	TRUE	0.903656	0.520795	FALSE	3.4414	1.20229e-10	TRUE	-2.25593	2.50957e-06	TRUE	0.281818	0.713185	FALSE	2.53775	3.46342e-09	TRUE
chr9_69317849_69318323	chr9	69317849	69318323	+	Intergenic	-6486	9413	FAM189A2	2.02466	0.00683395	TRUE	1.10479	0.38203	FALSE	3.44097	4.40009e-11	TRUE	-0.919872	0.242027	FALSE	1.41631	0.0126333	TRUE	2.33619	7.80196e-09	TRUE
chr3_81817004_81817314	chr3	81817004	81817314	+	Intergenic	-55360	2632	GBE1	3.21384	2.0476e-05	TRUE	0.735818	0.721842	FALSE	3.44079	5.83633e-07	TRUE	-2.47802	0.000106096	TRUE	0.226948	0.833116	FALSE	2.70497	2.37858e-06	TRUE
chr3_106474048_106474434	chr3	106474048	106474434	+	Intergenic	-604819	868	CBLB	3.02549	5.26427e-06	TRUE	2.19378	0.0212721	TRUE	3.29077	4.20309e-08	TRUE	-0.831711	0.152443	FALSE	0.265276	0.767144	FALSE	1.09699	0.0108645	TRUE
chr11_118692448_118692815	chr11	118692448	118692815	+	Intergenic	-12959	11181	TREH	3.02518	9.103e-09	TRUE	2.38158	0.000319189	TRUE	3.05052	1.42214e-09	TRUE	-0.643603	0.184403	FALSE	0.0253431	0.981026	FALSE	0.668946	0.0869707	FALSE
chr8_97649192_97649450	chr8	97649192	97649450	+	intron (NM_178812, intron 1 of 11)	5142	92140	MTDH	3.30291	3.55608e-06	TRUE	1.70617	0.197905	FALSE	3.44019	1.77191e-07	TRUE	-1.59673	0.00349618	TRUE	0.137286	0.894657	FALSE	1.73402	0.000307125	TRUE
chr14_90992702_90992969	chr14	90992702	90992969	+	intron (NM_182398, intron 2 of 12)	67299	9252	RPS6KA5	3.02168	0.0198442	TRUE	-0.359355	0.936341	FALSE	4.51343	2.70164e-07	TRUE	-3.38104	0.0106806	TRUE	1.49175	0.0885988	FALSE	4.87278	6.55124e-09	TRUE
chr7_17159535_17160032	chr7	17159535	17160032	+	Intergenic	-138869	196	AHR	3.39597	2.77987e-12	TRUE	2.9592	7.42506e-08	TRUE	3.43845	2.2117e-13	TRUE	-0.436766	0.389994	FALSE	0.0424802	0.964559	FALSE	0.479247	0.198927	FALSE
chr12_27208116_27208365	chr12	27208116	27208365	+	Intergenic	-35905	23012	STK38L	1.75342	0.0548453	FALSE	2.19456	0.0223813	TRUE	3.4375	6.55862e-09	TRUE	0.441145	0.68428	FALSE	1.68408	0.0126141	TRUE	1.24294	0.00312191	TRUE
chr1_184408498_184408993	chr1	184408498	184408993	+	intron (NM_030806, intron 1 of 5)	21729	81563	C1orf21	3.85606	1.97681e-09	TRUE	0.271732	0.917729	FALSE	3.43736	2.74192e-07	TRUE	-3.58433	1.94327e-10	TRUE	-0.4187	0.576066	FALSE	3.16563	7.42803e-08	TRUE
chr16_24669648_24669890	chr16	24669648	24669890	+	intron (NR_122072, intron 1 of 2)	1293	400511	LINC01567	1.92244	0.0319181	TRUE	1.09624	0.461999	FALSE	3.43592	3.96759e-08	TRUE	-0.826202	0.43701	FALSE	1.51348	0.0399533	TRUE	2.33968	3.1023e-06	TRUE
chr8_124618521_124618740	chr8	124618521	124618740	+	intron (NM_014751, intron 3 of 13)	79528	4715	NDUFB9	1.9521	0.051764	FALSE	3.16407	0.000124887	TRUE	3.43583	3.62925e-07	TRUE	1.21197	0.0531342	FALSE	1.48373	0.0617971	FALSE	0.271757	0.606967	FALSE
chr4_26731385_26731739	chr4	26731385	26731739	+	intron (NM_018317, intron 15 of 20)	128682	105374546	LOC105374546	2.31708	0.00486957	TRUE	0.525427	0.795942	FALSE	3.4333	7.0806e-08	TRUE	-1.79165	0.0220929	TRUE	1.11622	0.154561	FALSE	2.90787	1.19667e-07	TRUE
chr4_6855716_6856097	chr4	6855716	6856097	+	intron (NM_001100590, intron 3 of 8)	-53538	57533	TBC1D14	3.01806	1.68767e-05	TRUE	2.87267	0.000348462	TRUE	3.57347	5.17121e-09	TRUE	-0.145391	0.893226	FALSE	0.555408	0.48247	FALSE	0.7008	0.122078	FALSE
chr12_48512838_48513305	chr12	48512838	48513305	+	Intergenic	-12561	341568	OR8S1	3.07878	3.83611e-13	TRUE	1.43708	0.0431019	TRUE	3.43256	1.1672e-18	TRUE	-1.6417	6.8555e-07	TRUE	0.353781	0.499105	FALSE	1.99548	1.82191e-11	TRUE
chr4_74873612_74873900	chr4	74873612	74873900	+	Intergenic	-59319	25849	PARM1	3.61715	2.76621e-07	TRUE	1.36878	0.377666	FALSE	3.43215	8.04634e-07	TRUE	-2.24837	3.97651e-05	TRUE	-0.185008	0.862485	FALSE	2.06336	0.000135339	TRUE
chr9_22079821_22080338	chr9	22079821	22080338	+	intron (NR_003529, intron 12 of 18)	-70766	1030	CDKN2B	3.01784	1.16389e-06	TRUE	1.36481	0.240673	FALSE	4.28072	1.43673e-18	TRUE	-1.65303	0.00102711	TRUE	1.26288	0.0107047	TRUE	2.91591	3.19871e-15	TRUE
chr11_60764051_60764294	chr11	60764051	60764294	+	intron (NM_001278242, intron 2 of 5)	7305	219995	MS4A15	2.78655	7.12891e-05	TRUE	1.82118	0.0937207	FALSE	3.4308	4.69091e-09	TRUE	-0.965369	0.12416	FALSE	0.64425	0.362706	FALSE	1.60962	0.000134562	TRUE
chr6_79335089_79335735	chr6	79335089	79335735	+	Intergenic	-22028	80078	LCAL1	3.01356	1.62148e-14	TRUE	1.9239	0.000137971	TRUE	2.8918	5.61525e-14	TRUE	-1.08966	0.000819349	TRUE	-0.121756	0.873181	FALSE	0.967906	0.00218745	FALSE
chr6_144131350_144131705	chr6	144131350	144131705	+	Intergenic	-18990	8676	STX11	2.07149	0.0119955	TRUE	0.529264	0.787005	FALSE	3.42833	2.07328e-09	TRUE	-1.54222	0.0554195	FALSE	1.35684	0.0305066	TRUE	2.89907	1.67725e-09	TRUE
chr13_75512255_75512504	chr13	75512255	75512504	+	Intergenic	25493	170622	COMMD6	3.0655	3.48603e-09	TRUE	1.4707	0.106316	FALSE	3.42822	3.34224e-13	TRUE	-1.59481	8.62759e-05	TRUE	0.36272	0.570192	FALSE	1.95753	3.39677e-08	TRUE
chr11_36558487_36558990	chr11	36558487	36558990	+	Intergenic	-9275	5896	RAG1	3.7218	8.25649e-08	TRUE	0.918985	0.626226	FALSE	3.42574	1.02636e-06	TRUE	-2.80281	7.01089e-07	TRUE	-0.296055	0.761487	FALSE	2.50676	1.24777e-05	TRUE
chr1_159826529_159826798	chr1	159826529	159826798	+	promoter-TSS (NM_020125)	-26	56833	SLAMF8	3.32108	1.75323e-07	TRUE	1.67025	0.149628	FALSE	3.4239	9.74747e-09	TRUE	-1.65082	0.000682176	TRUE	0.102819	0.918209	FALSE	1.75364	6.90687e-05	TRUE
chr4_153220833_153221000	chr4	153220833	153221000	+	intron (NM_001302693, intron 1 of 2)	16502	23321	TRIM2	3.00969	0.000188721	TRUE	1.49239	0.315713	FALSE	3.95871	1.12828e-09	TRUE	-1.5173	0.0284144	TRUE	0.949018	0.199228	FALSE	2.46632	4.88745e-07	TRUE
chr1_198734323_198734625	chr1	198734323	198734625	+	intron (NM_080921, intron 19 of 29)	95506	5788	PTPRC	3.41039	9.23329e-08	TRUE	1.88791	0.081942	FALSE	3.42031	2.30611e-08	TRUE	-1.52248	0.0017606	TRUE	0.00991854	0.992674	FALSE	1.5324	0.000699255	TRUE
chr13_32041491_32041826	chr13	32041491	32041826	+	intron (NM_023037, intron 1 of 60)	-10019	100507099	FRY-AS1	3.12743	1.7866e-07	TRUE	1.28051	0.283047	FALSE	3.41776	3.8546e-10	TRUE	-1.84693	0.000104423	TRUE	0.290328	0.716426	FALSE	2.13726	3.67198e-07	TRUE
chr6_82408978_82409353	chr6	82408978	82409353	+	Intergenic	44921	7162	TPBG	3.30156	6.66557e-06	TRUE	1.08251	0.531559	FALSE	3.41718	5.82037e-07	TRUE	-2.21905	0.000187572	TRUE	0.115629	0.919345	FALSE	2.33468	1.7395e-05	TRUE
chr18_62638163_62638349	chr18	62638163	62638349	+	Intergenic	-77183	23239	PHLPP1	2.68383	0.00800965	TRUE	1.45895	0.426738	FALSE	3.41483	2.15379e-05	TRUE	-1.22488	0.20779	FALSE	0.731006	0.465774	FALSE	1.95588	0.0014869	TRUE
chr2_200881846_200882186	chr2	200881846	200882186	+	intron (NM_032472, intron 4 of 6)	7110	53938	PPIL3	3.48161	3.01947e-05	TRUE	0.50799	0.859262	FALSE	3.4148	2.01126e-05	TRUE	-2.97362	3.41308e-05	TRUE	-0.0668108	0.960389	FALSE	2.90681	2.3702e-05	TRUE
chr4_67131347_67131522	chr4	67131347	67131522	+	Intergenic	290566	101927237	LOC101927237	2.01813	0.0930655	FALSE	0.810462	0.741156	FALSE	3.4148	2.01126e-05	TRUE	-1.20767	0.373377	FALSE	1.39666	0.149531	FALSE	2.60434	8.06283e-05	TRUE
chr3_59867172_59867464	chr3	59867172	59867464	+	intron (NM_001354589, intron 7 of 8)	-208821	339902	LOC339902	3.20043	0.000333971	TRUE	0.124799	0.970887	FALSE	3.41478	2.01126e-05	TRUE	-3.07563	0.000160462	TRUE	0.214348	0.861286	FALSE	3.28998	5.64646e-06	TRUE
chr5_72369740_72369945	chr5	72369740	72369945	+	Intergenic	49475	79810	PTCD2	1.70471	0.195201	FALSE	1.27334	0.519014	FALSE	3.41478	2.01126e-05	TRUE	-0.431367	0.822411	FALSE	1.71007	0.0766714	FALSE	2.14144	0.000610473	TRUE
chrX_31604848_31605168	chrX	31604848	31605168	+	intron (NM_004010, intron 55 of 78)	-96710	1756	DMD	2.76966	0.00508718	TRUE	1.62322	0.343887	FALSE	3.41478	2.01126e-05	TRUE	-1.14644	0.222849	FALSE	0.645121	0.521735	FALSE	1.79156	0.0029376	TRUE
chr1_167539396_167539582	chr1	167539396	167539582	+	Intergenic	14330	8804	CREG1	3.07061	0.000840692	TRUE	1.27333	0.519014	FALSE	3.41476	2.01126e-05	TRUE	-1.79728	0.0205807	TRUE	0.344149	0.76492	FALSE	2.14143	0.000610473	TRUE
chr14_39446250_39446606	chr14	39446250	39446606	+	Intergenic	-13928	254170	FBXO33	3.00872	0.00046079	TRUE	1.07656	0.555557	FALSE	3.94969	3.11182e-08	TRUE	-1.93216	0.01095	TRUE	0.940975	0.28656	FALSE	2.87314	8.11199e-07	TRUE
chr11_112178561_112178722	chr11	112178561	112178722	+	intron (NM_001256400, intron 1 of 10)	2275	83875	BCO2	3.00265	0.000142152	TRUE	0.524205	0.821908	FALSE	3.6291	4.63933e-08	TRUE	-2.47844	0.000351518	TRUE	0.626454	0.445329	FALSE	3.1049	4.00739e-08	TRUE
chr3_41471084_41471289	chr3	41471084	41471289	+	intron (NR_136342, intron 30 of 34)	271735	1499	CTNNB1	2.7696	0.00508718	TRUE	1.27331	0.519014	FALSE	3.41475	2.01126e-05	TRUE	-1.49629	0.0973111	FALSE	0.645148	0.521735	FALSE	2.14144	0.000610473	TRUE
chr2_205868915_205869084	chr2	205868915	205869084	+	Intergenic	186499	8828	NRP2	2.15245	0.0630197	FALSE	1.62316	0.344007	FALSE	3.41469	2.04252e-05	TRUE	-0.529293	0.730899	FALSE	1.26224	0.190355	FALSE	1.79153	0.00297249	TRUE
chr1_161409867_161410161	chr1	161409867	161410161	+	Intergenic	-42131	257177	CFAP126	3.69951	2.56093e-13	TRUE	0.133832	0.949101	FALSE	3.41452	2.60085e-11	TRUE	-3.56568	3.57862e-15	TRUE	-0.28499	0.681674	FALSE	3.28069	1.07883e-12	TRUE
chr11_61083842_61084048	chr11	61083842	61084048	+	Intergenic	-10018	921	CD5	3.00109	0.001325	TRUE	-0.39846	0.907578	FALSE	3.46326	1.25989e-05	TRUE	-3.39955	0.000222137	TRUE	0.462175	0.663195	FALSE	3.86172	5.59791e-07	TRUE
chr2_233381436_233381597	chr2	233381436	233381597	+	intron (NM_152879, intron 1 of 29)	-6638	8527	DGKD	3.00105	0.001325	TRUE	1.06039	0.624029	FALSE	3.7635	4.48443e-07	TRUE	-1.94066	0.0159223	TRUE	0.762447	0.373337	FALSE	2.70311	3.79355e-06	TRUE
chr8_17926344_17926450	chr8	17926344	17926450	+	intron (NR_148032, intron 2 of 38)	3540	5108	PCM1	2.8455	0.000741041	TRUE	0.923604	0.627996	FALSE	3.41321	2.21905e-06	TRUE	-1.9219	0.0101361	TRUE	0.567704	0.567632	FALSE	2.4896	3.00756e-05	TRUE
chr8_99440042_99440302	chr8	99440042	99440302	+	intron (NM_017890, intron 22 of 61)	96558	693184	MIR599	2.9934	8.77574e-05	TRUE	0.272061	0.917326	FALSE	3.65682	5.95743e-09	TRUE	-2.72134	6.46413e-05	TRUE	0.663416	0.357015	FALSE	3.38476	7.03166e-10	TRUE
chr10_112996513_112996844	chr10	112996513	112996844	+	intron (NM_001198531, intron 4 of 12)	46428	6934	TCF7L2	3.4132	1.70755e-06	TRUE	1.80296	0.164423	FALSE	3.41083	5.57308e-07	TRUE	-1.61023	0.00315226	TRUE	-0.00236441	0.998385	FALSE	1.60787	0.00139523	TRUE
chr18_13678560_13678793	chr18	13678560	13678793	+	intron (NM_001098801, intron 3 of 4)	36918	753	LDLRAD4	2.99338	8.77574e-05	TRUE	-0.03041	0.992151	FALSE	3.06123	1.59867e-05	TRUE	-3.02379	1.94209e-05	TRUE	0.0678539	0.958047	FALSE	3.09164	2.52915e-06	TRUE
chr9_42365389_42365844	chr9	42365389	42365844	+	Intergenic	166754	100996582	FAM74A7	2.86453	1.62005e-06	TRUE	1.78667	0.0484995	TRUE	3.41029	8.91408e-11	TRUE	-1.07786	0.0371737	TRUE	0.545765	0.430587	FALSE	1.62362	3.75555e-05	TRUE
chr12_12645874_12646194	chr12	12645874	12646194	+	TTS (NM_001310)	34201	1389	CREBL2	2.94598	0.000168372	TRUE	2.69226	0.00492674	TRUE	3.40948	4.20672e-07	TRUE	-0.253718	0.806226	FALSE	0.463499	0.60199	FALSE	0.717217	0.137669	FALSE
chr15_63800833_63801060	chr15	63800833	63801060	+	intron (NM_003922, intron 1 of 77)	33002	8925	HERC1	2.99328	9.0129e-05	TRUE	1.60138	0.246252	FALSE	3.44069	1.69446e-07	TRUE	-1.3919	0.0274828	TRUE	0.447405	0.597473	FALSE	1.83931	0.000145087	TRUE
chr14_91261029_91261451	chr14	91261029	91261451	+	Intergenic	-7360	8111	GPR68	2.86681	1.26854e-07	TRUE	2.89937	3.69973e-07	TRUE	3.40882	9.06603e-13	TRUE	0.032568	0.973813	FALSE	0.542015	0.371505	FALSE	0.509447	0.157606	FALSE
chr20_31740396_31740564	chr20	31740396	31740564	+	intron (NM_012112, intron 1 of 17)	1379	22974	TPX2	2.53315	0.00328182	TRUE	1.36705	0.369558	FALSE	3.40847	3.91981e-07	TRUE	-1.1661	0.155746	FALSE	0.87532	0.272859	FALSE	2.04142	6.81176e-05	TRUE
chr21_36065698_36065911	chr21	36065698	36065911	+	Intergenic	-4120	873	CBR1	2.78104	0.000559429	TRUE	2.69188	0.00446536	TRUE	3.40714	2.95872e-07	TRUE	-0.0891566	0.944117	FALSE	0.6261	0.444258	FALSE	0.715256	0.127369	FALSE
chr4_1255843_1256059	chr4	1255843	1256059	+	Intergenic	6511	92070	CTBP1-DT	2.66208	0.00126826	TRUE	0.521995	0.821134	FALSE	3.40669	2.55744e-07	TRUE	-2.14009	0.0039763	TRUE	0.74461	0.346752	FALSE	2.8847	2.52115e-07	TRUE
chr9_15613010_15613250	chr9	15613010	15613250	+	intron (NM_001355547, intron 5 of 24)	49152	203238	CCDC171	2.23122	0.01536	TRUE	0.920468	0.618659	FALSE	3.40669	2.55744e-07	TRUE	-1.31075	0.153201	FALSE	1.17547	0.121446	FALSE	2.48622	2.65942e-06	TRUE
chr3_72634111_72634495	chr3	72634111	72634495	+	Intergenic	29946	105377162	LOC105377162	3.09869	5.29337e-08	TRUE	0.851632	0.520991	FALSE	3.4066	6.36418e-11	TRUE	-2.24705	2.14406e-06	TRUE	0.307917	0.692603	FALSE	2.55497	2.43633e-09	TRUE
chr1_192703845_192704137	chr1	192703845	192704137	+	Intergenic	-12337	100616345	MIR4426	3.62285	5.55189e-08	TRUE	1.98132	0.0997666	FALSE	3.40646	3.03555e-07	TRUE	-1.64152	0.000602524	TRUE	-0.216382	0.816042	FALSE	1.42514	0.00279681	TRUE
chr7_37784062_37784302	chr7	37784062	37784302	+	Intergenic	-64415	51314	NME8	2.99322	5.16708e-07	TRUE	2.01374	0.0183356	TRUE	2.95713	2.70864e-07	TRUE	-0.979488	0.0623258	FALSE	-0.0360959	0.977642	FALSE	0.943392	0.0419426	FALSE
chr7_16350742_16350993	chr7	16350742	16350993	+	intron (NM_001101417, intron 2 of 8)	70455	729920	ISPD	3.45296	6.27162e-07	TRUE	-1.76651	0.493707	FALSE	3.40526	3.37391e-07	TRUE	-5.21947	1.2558e-10	TRUE	-0.0476949	0.967651	FALSE	5.17177	4.83323e-11	TRUE
chr18_56532110_56532526	chr18	56532110	56532526	+	Intergenic	106371	9352	TXNL1	2.85673	1.07348e-05	TRUE	0.902249	0.529521	FALSE	3.40462	1.94738e-09	TRUE	-1.95448	0.00039812	TRUE	0.547893	0.461806	FALSE	2.50237	6.70995e-08	TRUE
chr22_24273121_24273323	chr22	24273121	24273323	+	intron (NM_001254732, intron 1 of 14)	2405	23384	SPECC1L	3.50057	8.57728e-10	TRUE	0.908019	0.524445	FALSE	3.40397	1.12382e-09	TRUE	-2.59255	2.46899e-08	TRUE	-0.0966002	0.919907	FALSE	2.49595	4.00057e-08	TRUE
chr6_14875599_14876019	chr6	14875599	14876019	+	Intergenic	-370166	3720	JARID2	2.35962	1.45019e-05	TRUE	2.19254	0.000492878	TRUE	3.40363	2.08351e-14	TRUE	-0.167078	0.850445	FALSE	1.04401	0.0429047	TRUE	1.21109	0.000239581	TRUE
chr1_199172777_199172982	chr1	199172777	199172982	+	intron (NR_147896, intron 3 of 3)	24281	400800	LOC400800	2.99295	9.38933e-05	TRUE	0.73502	0.719054	FALSE	3.53718	4.64935e-08	TRUE	-2.25793	0.000538019	TRUE	0.544228	0.488233	FALSE	2.80216	1.24667e-07	TRUE
chr1_67441855_67442099	chr1	67441855	67442099	+	Intergenic	-11537	26135	SERBP1	2.83864	0.000405217	TRUE	-0.0299626	0.992209	FALSE	3.40199	4.44078e-07	TRUE	-2.8686	0.000134799	TRUE	0.563353	0.507324	FALSE	3.43195	3.03312e-08	TRUE
chr3_187834166_187834479	chr3	187834166	187834479	+	Intergenic	-88597	604	BCL6	2.78622	6.64528e-05	TRUE	1.58967	0.176612	FALSE	3.40037	6.21352e-09	TRUE	-1.19655	0.0456238	TRUE	0.614153	0.386479	FALSE	1.8107	2.55988e-05	TRUE
chr8_73053909_73054131	chr8	73053909	73054131	+	Intergenic	39252	157869	SBSPON	2.98934	5.58141e-06	TRUE	0.130791	0.957902	FALSE	2.48526	0.000345984	TRUE	-2.85855	1.48131e-06	TRUE	-0.504086	0.548871	FALSE	2.35447	0.000236047	TRUE
chr1_111148426_111148826	chr1	111148426	111148826	+	intron (NM_001007794, intron 2 of 8)	-8410	128338	DRAM2	2.98931	5.58141e-06	TRUE	-0.804767	0.724774	FALSE	2.48519	0.000345984	TRUE	-3.79408	1.88739e-08	TRUE	-0.504129	0.548818	FALSE	3.28995	5.64646e-06	TRUE
chr7_26279405_26279673	chr7	26279405	26279673	+	Intergenic	-12356	29887	SNX10	3.02661	5.73391e-06	TRUE	1.50416	0.220203	FALSE	3.39695	9.34859e-09	TRUE	-1.52245	0.00449636	TRUE	0.370338	0.645567	FALSE	1.89279	1.82592e-05	TRUE
chr8_9012065_9012391	chr8	9012065	9012391	+	intron (NM_153332, intron 3 of 6)	9102	90459	ERI1	2.97922	1.58231e-07	TRUE	1.18313	0.290316	FALSE	3.39622	2.31143e-11	TRUE	-1.7961	9.03094e-05	TRUE	0.416994	0.536375	FALSE	2.21309	2.31608e-08	TRUE
chr17_2254006_2254257	chr17	2254006	2254257	+	intron (NM_017575, intron 8 of 18)	12068	23293	SMG6	2.98928	1.53306e-06	TRUE	2.04448	0.0238502	TRUE	3.03159	2.80902e-07	TRUE	-0.944796	0.079178	FALSE	0.0423088	0.972016	FALSE	0.987105	0.0304873	FALSE
chr6_118280215_118280490	chr6	118280215	118280490	+	intron (NM_001029858, intron 6 of 7)	194449	105377967	LOC105377967	2.98924	5.64803e-06	TRUE	0.529225	0.787005	FALSE	3.01545	1.25376e-06	TRUE	-2.46002	1.34339e-05	TRUE	0.0262084	0.982419	FALSE	2.48623	2.70282e-06	TRUE
chr10_62647468_62647973	chr10	62647468	62647973	+	intron (NM_199452, intron 2 of 6)	127272	22891	ZNF365	3.54809	5.7897e-12	TRUE	1.74967	0.0344791	TRUE	3.38936	3.08485e-11	TRUE	-1.79842	1.11586e-05	TRUE	-0.158724	0.864464	FALSE	1.63969	4.77624e-05	TRUE
chr4_109278588_109278821	chr4	109278588	109278821	+	intron (NM_198721, intron 3 of 36)	23663	84570	COL25A1	2.98924	6.35826e-06	TRUE	0.693464	0.697923	FALSE	3.08104	6.08627e-07	TRUE	-2.29577	3.93135e-05	TRUE	0.0918077	0.931256	FALSE	2.38758	3.3865e-06	TRUE
chr8_29366761_29367103	chr8	29366761	29367103	+	Intergenic	-16182	1846	DUSP4	3.20958	7.7958e-14	TRUE	0.859588	0.373684	FALSE	3.38588	5.00673e-17	TRUE	-2.34999	2.10893e-11	TRUE	0.1763	0.786557	FALSE	2.52629	1.436e-14	TRUE
chr5_97094999_97095506	chr5	97094999	97095506	+	intron (NM_153234, intron 5 of 5)	47564	167410	LIX1	2.98582	4.10859e-11	TRUE	1.12124	0.191887	FALSE	3.1796	6.25825e-14	TRUE	-1.86459	3.24783e-07	TRUE	0.193773	0.784385	FALSE	2.05836	1.04656e-09	TRUE
chr6_4348373_4348750	chr6	4348373	4348750	+	Intergenic	-79441	NA		2.64356	0.00247407	TRUE	0.915466	0.631116	FALSE	3.3838	2.30678e-06	TRUE	-1.7281	0.0307692	TRUE	0.740238	0.428487	FALSE	2.46833	2.88802e-05	TRUE
chr13_44197996_44198344	chr13	44197996	44198344	+	Intergenic	-1970	102465876	MIR8079	3.06792	1.32677e-06	TRUE	0.908638	0.529377	FALSE	3.38219	5.73431e-09	TRUE	-2.15928	5.1981e-05	TRUE	0.314272	0.728665	FALSE	2.47355	2.28257e-07	TRUE
chr5_108720417_108720810	chr5	108720417	108720810	+	Intergenic	7648	100652853	LINC01023	2.69515	5.01564e-07	TRUE	1.80959	0.0174549	TRUE	3.38174	3.40748e-13	TRUE	-0.88556	0.0680746	FALSE	0.686587	0.232849	FALSE	1.57215	5.85425e-06	TRUE
chr7_43784738_43785081	chr7	43784738	43785081	+	intron (NM_001253823, intron 3 of 8)	26236	644	BLVRA	3.48954	1.27501e-09	TRUE	1.70561	0.0964757	FALSE	3.37786	2.11085e-09	TRUE	-1.78393	4.05296e-05	TRUE	-0.111675	0.906492	FALSE	1.67225	7.69621e-05	TRUE
chr6_137830575_137830899	chr6	137830575	137830899	+	intron (NR_049793, intron 3 of 3)	-36451	7128	TNFAIP3	2.98555	1.99137e-05	TRUE	1.74603	0.128943	FALSE	3.6891	5.35333e-10	TRUE	-1.23952	0.0374424	TRUE	0.703554	0.326736	FALSE	1.94308	8.9414e-06	TRUE
chr18_42026062_42026288	chr18	42026062	42026288	+	intron (NM_001308020, intron 12 of 23)	70977	5289	PIK3C3	2.33182	0.00288437	TRUE	-0.423395	0.863114	FALSE	3.377	1.20446e-08	TRUE	-2.75521	0.000394432	TRUE	1.04519	0.125561	FALSE	3.8004	4.12351e-11	TRUE
chr16_18594893_18595194	chr16	18594893	18595194	+	intron (NR_003569, intron 9 of 9)	23795	653190	ABCC6P1	2.98544	2.76679e-06	TRUE	1.10915	0.394681	FALSE	3.40019	2.32983e-09	TRUE	-1.87629	0.000399112	TRUE	0.414749	0.605079	FALSE	2.29104	4.81222e-07	TRUE
chr4_119238023_119238597	chr4	119238023	119238597	+	intron (NM_019050, intron 3 of 17)	-25666	101929762	LOC101929762	2.96921	3.97135e-10	TRUE	-0.151462	0.931619	FALSE	3.36748	6.17733e-15	TRUE	-3.12067	2.83239e-12	TRUE	0.398274	0.492367	FALSE	3.51895	3.52378e-18	TRUE
chr3_46090180_46090472	chr3	46090180	46090472	+	Intergenic	-62839	2829	XCR1	2.54364	1.45568e-07	TRUE	1.76002	0.00803134	TRUE	3.37503	1.08228e-16	TRUE	-0.783615	0.0760389	FALSE	0.831397	0.073815	FALSE	1.61501	6.40992e-08	TRUE
chr12_46763286_46763614	chr12	46763286	46763614	+	Intergenic	62547	55089	SLC38A4	2.96559	3.80652e-06	TRUE	1.70959	0.0988316	FALSE	3.34095	6.79094e-09	TRUE	-1.256	0.0204935	TRUE	0.375357	0.658497	FALSE	1.63136	0.000196912	TRUE
chr11_59218944_59219219	chr11	59218944	59219219	+	Intergenic	-6060	219972	MPEG1	2.9601	6.24443e-11	TRUE	1.84735	0.00446984	TRUE	3.04589	1.7167e-12	TRUE	-1.11276	0.00198243	TRUE	0.0857845	0.915315	FALSE	1.19854	0.000238235	TRUE
chr15_86183832_86184067	chr15	86183832	86184067	+	intron (NM_152336, intron 5 of 24)	-67232	101929701	LINC01584	2.23139	0.0157668	TRUE	1.48902	0.302916	FALSE	3.37326	4.93207e-07	TRUE	-0.742366	0.484897	FALSE	1.14188	0.148705	FALSE	1.88424	0.000185502	TRUE
chr2_136052499_136052729	chr2	136052499	136052729	+	Intergenic	63621	7852	CXCR4	2.95663	1.94881e-06	TRUE	2.18093	0.0110733	TRUE	4.28841	2.58161e-19	TRUE	-0.775694	0.170953	FALSE	1.33179	0.00439022	TRUE	2.10748	8.06241e-11	TRUE
chr3_100124316_100124633	chr3	100124316	100124633	+	intron (NM_001167924, intron 1 of 9)	9544	84319	CMSS1	2.14499	0.0226224	TRUE	0.521983	0.821134	FALSE	3.37217	4.08032e-07	TRUE	-1.62301	0.0828976	FALSE	1.22719	0.109661	FALSE	2.85019	4.42562e-07	TRUE
chr3_37907883_37908247	chr3	37907883	37908247	+	intron (NM_001008392, intron 1 of 7)	45887	10217	CTDSPL	2.9548	2.23171e-07	TRUE	1.57787	0.0992124	FALSE	2.75148	1.13584e-06	TRUE	-1.37693	0.00273797	TRUE	-0.20332	0.825453	FALSE	1.17361	0.00935446	TRUE
chr5_175517917_175518214	chr5	175517917	175518214	+	intron (NM_001322977, intron 8 of 10)	39567	94081	SFXN1	3.45456	1.56914e-06	TRUE	3.33614	3.33465e-05	TRUE	3.36859	1.35819e-06	TRUE	-0.118423	0.909649	FALSE	-0.0859713	0.94392	FALSE	0.0324515	0.962077	FALSE
chr2_73821398_73821572	chr2	73821398	73821572	+	Intergenic	-7426	10617	STAMBP	2.95442	1.98722e-06	TRUE	1.00711	0.454266	FALSE	3.32606	2.32983e-09	TRUE	-1.94731	0.000150971	TRUE	0.371646	0.635506	FALSE	2.31895	1.92319e-07	TRUE
chr1_182761365_182761743	chr1	182761365	182761743	+	Intergenic	-27895	80896	NPL	2.95159	1.01587e-05	TRUE	0.343913	0.877231	FALSE	3.26716	4.25769e-08	TRUE	-2.60767	9.52246e-06	TRUE	0.31557	0.709411	FALSE	2.92324	1.65468e-08	TRUE
chr3_138296663_138297026	chr3	138296663	138297026	+	3' UTR (NM_001267042, exon 21 of 21)	33042	347736	NME9	3.07154	4.63387e-07	TRUE	1.71014	0.091826	FALSE	3.3664	1.26396e-09	TRUE	-1.3614	0.00520598	TRUE	0.294861	0.721332	FALSE	1.65626	5.64075e-05	TRUE
chr18_44871275_44872102	chr18	44871275	44872102	+	intron (NM_015559, intron 3 of 5)	98478	100422829	MIR4319	2.94827	9.91328e-11	TRUE	0.693953	0.47895	FALSE	2.67125	4.19441e-09	TRUE	-2.25432	1.348e-08	TRUE	-0.277025	0.72316	FALSE	1.97729	6.41009e-07	TRUE
chr2_176999507_176999663	chr2	176999507	176999663	+	Intergenic	-213109	220988	HNRNPA3	2.928	0.00208761	TRUE	2.13994	0.134849	FALSE	3.36463	3.22862e-05	TRUE	-0.788065	0.411002	FALSE	0.436625	0.696433	FALSE	1.22469	0.0381255	TRUE
chr3_122586260_122586369	chr3	122586260	122586369	+	intron (NM_001113523, intron 1 of 11)	8712	165631	PARP15	2.27549	0.0419684	TRUE	0.508018	0.859262	FALSE	3.36463	3.22862e-05	TRUE	-1.76748	0.12001	FALSE	1.08913	0.266614	FALSE	2.85661	4.07986e-05	TRUE
chr11_102936897_102937145	chr11	102936897	102937145	+	Intergenic	18713	4322	MMP13	2.49388	0.0185247	TRUE	2.34223	0.0796179	FALSE	3.36463	3.22862e-05	TRUE	-0.151647	0.924335	FALSE	0.870745	0.384743	FALSE	1.02239	0.0808858	FALSE
chr4_70877684_70877905	chr4	70877684	70877905	+	Intergenic	-24546	92597	MOB1B	2.01813	0.0930655	FALSE	0.810472	0.741156	FALSE	3.36461	3.22862e-05	TRUE	-1.20766	0.373377	FALSE	1.34648	0.172098	FALSE	2.55414	0.000136503	TRUE
chr9_3181665_3181898	chr9	3181665	3181898	+	non-coding (NR_121585, exon 1 of 5)	192	101929247	LINC01231	2.92794	0.00208761	TRUE	3.17812	0.00173234	TRUE	3.36461	3.22862e-05	TRUE	0.250176	0.826488	FALSE	0.436666	0.696433	FALSE	0.186491	0.77708	FALSE
chr9_73153012_73153128	chr9	73153012	73153128	+	intron (NM_000700, intron 1 of 12)	1339	301	ANXA1	2.59173	0.0120942	TRUE	2.13991	0.134849	FALSE	3.36461	3.22862e-05	TRUE	-0.451811	0.729943	FALSE	0.772885	0.446894	FALSE	1.2247	0.0381255	TRUE
chr15_63638929_63639093	chr15	63638929	63639093	+	intron (NM_003922, intron 61 of 77)	-38184	100130855	USP3-AS1	2.38879	0.0279794	TRUE	-0.398455	0.907578	FALSE	3.36461	3.22862e-05	TRUE	-2.78724	0.0131344	TRUE	0.97582	0.326092	FALSE	3.76306	1.87537e-06	TRUE
chr5_126443327_126443728	chr5	126443327	126443728	+	intron (NR_146195, intron 1 of 15)	20381	65983	GRAMD2B	2.94715	1.19908e-06	TRUE	0.757567	0.594672	FALSE	3.13986	2.74748e-08	TRUE	-2.18958	2.74818e-05	TRUE	0.192705	0.851034	FALSE	2.38229	6.35158e-07	TRUE
chr10_87761939_87762227	chr10	87761939	87762227	+	intron (NR_135914, intron 8 of 10)	56148	84896	ATAD1	2.52219	5.93695e-07	TRUE	0.308804	0.829022	FALSE	3.35836	7.4064e-15	TRUE	-2.21339	1.10654e-06	TRUE	0.836171	0.109356	FALSE	3.04956	1.74383e-15	TRUE
chr10_22308449_22308665	chr10	22308449	22308665	+	Intergenic	-7826	23412	COMMD3	2.14323	0.0270669	TRUE	1.89579	0.137716	FALSE	3.35762	2.00058e-06	TRUE	-0.247431	0.869243	FALSE	1.2144	0.162307	FALSE	1.46183	0.00597405	TRUE
chr20_49776257_49776593	chr20	49776257	49776593	+	Intergenic	-36288	23315	SLC9A8	2.94681	3.85884e-09	TRUE	0.99737	0.33276	FALSE	3.23907	1.72663e-12	TRUE	-1.94944	1.91912e-06	TRUE	0.292256	0.667882	FALSE	2.2417	1.22852e-09	TRUE
chr12_118312626_118312813	chr12	118312626	118312813	+	intron (NM_001346493, intron 1 of 22)	47001	51347	TAOK3	2.84519	0.000644463	TRUE	0.27154	0.918859	FALSE	3.35746	2.75591e-06	TRUE	-2.57365	0.000747777	TRUE	0.512268	0.608242	FALSE	3.08592	1.36522e-06	TRUE
chr17_4800510_4800787	chr17	4800510	4800787	+	Intergenic	4504	5694	PSMB6	2.94131	0.000210115	TRUE	0.732953	0.722045	FALSE	3.357	1.15448e-06	TRUE	-2.20836	0.00129035	TRUE	0.415682	0.666242	FALSE	2.62404	4.8596e-06	TRUE
chr17_32223830_32224051	chr17	32223830	32224051	+	intron (NR_110083, intron 20 of 20)	-42236	162494	RHBDL3	2.50105	0.000884348	TRUE	0.975265	0.525971	FALSE	3.35601	1.84402e-08	TRUE	-1.52578	0.0237764	TRUE	0.85496	0.224691	FALSE	2.38074	5.55104e-07	TRUE
chr19_16136790_16136955	chr19	16136790	16136955	+	intron (NM_001291274, intron 1 of 7)	2844	84941	HSH2D	2.9463	1.77867e-05	TRUE	0.341709	0.879216	FALSE	3.18305	3.4691e-07	TRUE	-2.60459	1.87092e-05	TRUE	0.23675	0.813472	FALSE	2.84134	2.044e-07	TRUE
chr6_2111174_2111472	chr6	2111174	2111472	+	intron (NM_001500, intron 4 of 10)	64668	2762	GMDS	2.72003	1.94283e-05	TRUE	1.10551	0.383358	FALSE	3.35487	3.84118e-10	TRUE	-1.61453	0.0025292	TRUE	0.634838	0.326018	FALSE	2.24936	7.16013e-08	TRUE
chr3_52670791_52671299	chr3	52670791	52671299	+	intron (NM_001350076, intron 5 of 31)	14514	55193	PBRM1	2.73853	6.54911e-05	TRUE	2.14255	0.0193162	TRUE	3.34943	1.75619e-08	TRUE	-0.595978	0.441605	FALSE	0.610898	0.451235	FALSE	1.20688	0.00816776	TRUE
chr2_100064705_100064972	chr2	100064705	100064972	+	intron (NM_001025108, intron 2 of 23)	40745	3899	AFF3	2.14099	0.0084716	TRUE	0.841527	0.608145	FALSE	3.34932	1.10193e-08	TRUE	-1.29946	0.10321	FALSE	1.20833	0.0684101	FALSE	2.50779	1.12918e-07	TRUE
chr5_151154006_151154225	chr5	151154006	151154225	+	intron (NM_001155, intron 1 of 25)	3767	309	ANXA6	2.03794	0.00354494	TRUE	1.33281	0.207623	FALSE	3.34884	8.6814e-11	TRUE	-0.705134	0.374981	FALSE	1.31089	0.0248283	TRUE	2.01603	4.24046e-07	TRUE
chr6_119139026_119139469	chr6	119139026	119139469	+	intron (NM_001100411, intron 1 of 16)	9946	79632	FAM184A	2.94491	0.000191125	TRUE	-0.412302	0.885157	FALSE	3.88602	4.4873e-10	TRUE	-3.35721	1.39801e-05	TRUE	0.941106	0.165299	FALSE	4.29832	9.36891e-13	TRUE
chr3_27454992_27455290	chr3	27454992	27455290	+	intron (NR_135543, intron 1 of 22)	1613	9497	SLC4A7	3.20243	7.06686e-07	TRUE	0.694507	0.699064	FALSE	3.34513	2.48061e-08	TRUE	-2.50793	3.60952e-06	TRUE	0.1427	0.887542	FALSE	2.65063	9.89246e-08	TRUE
chr14_71472480_71472676	chr14	71472480	71472676	+	intron (NM_001284247, intron 1 of 23)	-15283	145474	LOC145474	2.46533	0.00518065	TRUE	1.48934	0.306702	FALSE	3.34493	1.16309e-06	TRUE	-0.975986	0.276599	FALSE	0.879607	0.295277	FALSE	1.85559	0.000401032	TRUE
chr15_74552799_74553172	chr15	74552799	74553172	+	intron (NM_006465, intron 2 of 8)	11808	10620	ARID3B	1.61495	0.389583	FALSE	4.84007	5.97048e-08	TRUE	3.34443	0.00262952	TRUE	3.22512	3.07521e-07	TRUE	1.72947	0.237093	FALSE	-1.49565	0.001578	TRUE
chr18_74595542_74595772	chr18	74595542	74595772	+	intron (NR_024484, intron 1 of 1)	2178	400657	LINC00909	2.94402	2.25641e-05	TRUE	0.841346	0.613387	FALSE	3.35517	4.69455e-08	TRUE	-2.10267	0.000356322	TRUE	0.411144	0.630684	FALSE	2.51382	5.92426e-07	TRUE
chr2_151288247_151288463	chr2	151288247	151288463	+	intron (NM_004688, intron 1 of 7)	1561	9111	NMI	2.94349	0.000148196	TRUE	1.36581	0.368255	FALSE	3.22445	2.98882e-06	TRUE	-1.57768	0.0146431	TRUE	0.280957	0.787878	FALSE	1.85864	0.000479226	TRUE
chr8_125163401_125163740	chr8	125163401	125163740	+	intron (NR_146192, intron 5 of 5)	71747	286053	NSMCE2	2.94286	2.47057e-05	TRUE	1.95446	0.0650494	FALSE	3.41385	2.39487e-08	TRUE	-0.988408	0.110469	FALSE	0.470988	0.565697	FALSE	1.4594	0.00117326	TRUE
chr9_112224941_112225295	chr9	112224941	112225295	+	intron (NM_001244896, intron 11 of 12)	-49821	64420	SUSD1	2.93957	0.000215822	TRUE	1.08414	0.531292	FALSE	3.51764	1.6993e-07	TRUE	-1.85543	0.00595702	TRUE	0.578073	0.494665	FALSE	2.4335	4.91289e-06	TRUE
chr10_69048157_69048375	chr10	69048157	69048375	+	Intergenic	-39180	5552	SRGN	2.94541	3.98277e-06	TRUE	1.58222	0.142914	FALSE	3.3384	5.34469e-09	TRUE	-1.36318	0.0105687	TRUE	0.392989	0.632291	FALSE	1.75617	5.77988e-05	TRUE
chr1_204464437_204464579	chr1	204464437	204464579	+	exon (NM_002646, exon 5 of 34)	25838	5287	PIK3C2B	3.2549	1.2127e-05	TRUE	1.89147	0.135406	FALSE	3.33712	1.69593e-06	TRUE	-1.36344	0.022168	TRUE	0.0822184	0.948284	FALSE	1.44566	0.00536935	TRUE
chr4_39937999_39938229	chr4	39937999	39938229	+	intron (NM_001100400, intron 2 of 15)	39842	23244	PDS5A	3.22109	8.40946e-06	TRUE	-0.0304164	0.992151	FALSE	3.33678	6.51166e-07	TRUE	-3.25151	1.0584e-06	TRUE	0.115686	0.914732	FALSE	3.36719	4.59815e-08	TRUE
chr3_122482946_122483363	chr3	122482946	122483363	+	intron (NR_026698, intron 2 of 14)	31785	3836	KPNA1	2.93638	1.86184e-05	TRUE	0.39322	0.845026	FALSE	2.91903	9.53641e-06	TRUE	-2.54316	3.93155e-05	TRUE	-0.0173527	0.990091	FALSE	2.52581	2.13136e-05	TRUE
chr20_38997464_38998068	chr20	38997464	38998068	+	intron (NR_033905, intron 8 of 21)	35428	60625	DHX35	2.93173	1.54661e-07	TRUE	0.984464	0.373713	FALSE	2.74087	6.64015e-07	TRUE	-1.94727	4.46194e-05	TRUE	-0.19086	0.854129	FALSE	1.75641	0.000200307	TRUE
chr10_3869118_3869321	chr10	3869118	3869321	+	Intergenic	35269	105376365	LOC105376365	3.1046	0.000115197	TRUE	1.97566	0.119784	FALSE	3.3346	5.27985e-06	TRUE	-1.12894	0.116978	FALSE	0.229998	0.854129	FALSE	1.35893	0.0160222	TRUE
chr13_79522592_79522924	chr13	79522592	79522924	+	intron (NM_001161407, intron 2 of 7)	-41527	100874208	NDFIP2-AS1	2.33686	0.00347279	TRUE	2.65867	0.00157311	TRUE	3.33395	7.0301e-08	TRUE	0.321805	0.748723	FALSE	0.997089	0.185201	FALSE	0.675284	0.144644	FALSE
chr6_45737609_45737937	chr6	45737609	45737937	+	Intergenic	199824	53405	CLIC5	2.90719	5.14211e-07	TRUE	1.83536	0.0355603	TRUE	3.3315	1.14421e-10	TRUE	-1.07184	0.0276266	TRUE	0.424309	0.544074	FALSE	1.49614	8.71255e-05	TRUE
chr10_124688892_124689242	chr10	124688892	124689242	+	intron (NM_014661, intron 3 of 4)	-14961	101927944	FAM53B-AS1	2.93061	5.05876e-09	TRUE	1.72582	0.0168362	TRUE	3.62994	1.6967e-15	TRUE	-1.20478	0.00632033	TRUE	0.699328	0.253222	FALSE	1.90411	1.60657e-07	TRUE
chr5_77379649_77379934	chr5	77379649	77379934	+	intron (NM_001029853, intron 9 of 20)	112749	55255	WDR41	2.99644	0.000135998	TRUE	1.70578	0.206699	FALSE	3.32577	1.73946e-06	TRUE	-1.29066	0.0540468	FALSE	0.32933	0.750999	FALSE	1.61999	0.00199598	TRUE
chr10_4100403_4100733	chr10	4100403	4100733	+	Intergenic	48842	101927964	LOC101927964	3.13153	2.33592e-05	TRUE	0.99003	0.542282	FALSE	3.32471	1.39479e-06	TRUE	-2.1415	0.000818531	TRUE	0.193179	0.879859	FALSE	2.33468	5.70513e-05	TRUE
chr13_30224849_30225135	chr13	30224849	30225135	+	intron (NM_001014380, intron 9 of 10)	-71918	102157400	LINC00384	2.92859	0.00336836	TRUE	2.2483	0.118398	FALSE	4.49714	3.8575e-10	TRUE	-0.680288	0.543542	FALSE	1.56855	0.0332682	TRUE	2.24884	5.64355e-06	TRUE
chr5_157464952_157465144	chr5	157464952	157465144	+	intron (NM_001172292, intron 2 of 4)	-4948	102724404	LOC102724404	2.33142	0.00260717	TRUE	1.58987	0.174469	FALSE	3.32111	1.66445e-08	TRUE	-0.741555	0.370625	FALSE	0.989685	0.147755	FALSE	1.73124	6.26399e-05	TRUE
chrX_79182621_79183002	chrX	79182621	79183002	+	Intergenic	11839	84636	GPR174	2.92216	6.04714e-06	TRUE	2.71077	0.00028755	TRUE	3.28337	1.66989e-08	TRUE	-0.211383	0.820781	FALSE	0.361212	0.678442	FALSE	0.572595	0.211711	FALSE
chr2_109479901_109480404	chr2	109479901	109480404	+	intron (NM_001099289, intron 8 of 9)	133505	151011	2018-09-10	3.21412	1.45862e-13	TRUE	-0.0685406	0.968613	FALSE	3.31896	1.12358e-15	TRUE	-3.28266	2.61423e-16	TRUE	0.104842	0.88989	FALSE	3.3875	1.12542e-18	TRUE
chr1_23720629_23720948	chr1	23720629	23720948	+	Intergenic	-22578	6924	ELOA	2.96697	2.65209e-10	TRUE	1.7521	0.0133826	TRUE	3.31761	1.06913e-14	TRUE	-1.21487	0.00101955	TRUE	0.350632	0.552563	FALSE	1.56551	7.40024e-07	TRUE
chr13_45109314_45109675	chr13	45109314	45109675	+	intron (NR_120424, intron 2 of 2)	3215	101929259	LOC101929259	2.55962	0.000132875	TRUE	1.19501	0.330811	FALSE	3.31622	1.79839e-09	TRUE	-1.36462	0.0202653	TRUE	0.756591	0.255075	FALSE	2.12121	7.66311e-07	TRUE
chr6_158648714_158648977	chr6	158648714	158648977	+	Intergenic	-1169	94120	SYTL3	2.94697	2.07933e-09	TRUE	1.3099	0.128605	FALSE	3.31565	1.94004e-13	TRUE	-1.63707	4.12339e-05	TRUE	0.368681	0.570673	FALSE	2.00575	1.51523e-08	TRUE
chr1_67304093_67304355	chr1	67304093	67304355	+	Intergenic	-3140	3595	IL12RB2	1.16662	0.364015	FALSE	1.70358	0.209042	FALSE	3.31388	2.45467e-06	TRUE	0.536959	0.726617	FALSE	2.14726	0.0142064	TRUE	1.61031	0.00253809	TRUE
chr3_99940335_99940594	chr3	99940335	99940594	+	intron (NM_001042459, intron 1 of 4)	23934	100500859	MIR3921	1.04948	0.522929	FALSE	4.48102	1.58075e-09	TRUE	3.31363	8.39883e-05	TRUE	3.43155	2.22541e-09	TRUE	2.26415	0.0388436	TRUE	-1.1674	0.00580419	TRUE
chr5_96957423_96957727	chr5	96957423	96957727	+	promoter-TSS (NM_175920)	-877	4012	LNPEP	2.92104	2.75519e-06	TRUE	1.00701	0.453404	FALSE	3.77413	2.04777e-13	TRUE	-1.91403	0.000207545	TRUE	0.853093	0.129815	FALSE	2.76712	1.10044e-11	TRUE
chr12_21615576_21615790	chr12	21615576	21615790	+	Intergenic	-10836	2998	GYS2	1.1648	0.363278	FALSE	1.70583	0.205713	FALSE	3.31229	1.9688e-06	TRUE	0.541028	0.721976	FALSE	2.14748	0.012842	TRUE	1.60646	0.00221112	TRUE
chr1_92474091_92474519	chr1	92474091	92474519	+	3' UTR (NM_001127215, exon 7 of 7)	9649	2672	GFI1	2.91806	9.62848e-07	TRUE	1.32816	0.219016	FALSE	3.44546	6.66307e-11	TRUE	-1.58989	0.00128827	TRUE	0.527405	0.452129	FALSE	2.1173	2.81094e-07	TRUE
chr2_16651054_16651255	chr2	16651054	16651255	+	intron (NM_030797, intron 1 of 11)	14712	81553	FAM49A	2.91092	1.82756e-05	TRUE	0.131037	0.957909	FALSE	3.29339	3.60783e-08	TRUE	-2.77988	6.35597e-06	TRUE	0.38247	0.639167	FALSE	3.16235	3.74113e-09	TRUE
chr18_41982930_41983260	chr18	41982930	41983260	+	intron (NM_001308020, intron 3 of 23)	27897	5289	PIK3C3	2.75275	0.000247831	TRUE	-0.116179	0.965621	FALSE	3.30754	3.45672e-07	TRUE	-2.86893	5.76741e-05	TRUE	0.554787	0.536675	FALSE	3.42371	2.02023e-08	TRUE
chr8_141157119_141157425	chr8	141157119	141157425	+	intron (NR_148197, intron 8 of 23)	28660	22898	DENND3	2.90506	4.37386e-07	TRUE	1.03016	0.390028	FALSE	3.47593	3.91272e-12	TRUE	-1.8749	7.45059e-05	TRUE	0.570865	0.357981	FALSE	2.44577	7.84709e-10	TRUE
chr15_50487342_50487652	chr15	50487342	50487652	+	intron (NM_001128610, intron 12 of 19)	59208	373509	USP50	2.89711	1.72623e-10	TRUE	0.740038	0.473788	FALSE	2.94168	1.3695e-11	TRUE	-2.15707	1.39705e-08	TRUE	0.0445744	0.959703	FALSE	2.20164	1.24544e-09	TRUE
chr13_31045863_31046083	chr13	31045863	31046083	+	Intergenic	113276	122046	TEX26	2.32518	0.00358863	TRUE	2.0803	0.0396107	TRUE	3.30519	9.88509e-08	TRUE	-0.244881	0.835399	FALSE	0.980007	0.194649	FALSE	1.22489	0.00760815	TRUE
chr8_128162742_128163009	chr8	128162742	128163009	+	Intergenic	12759	100302281	MIR1208	2.42962	0.000103126	TRUE	-0.218049	0.91705	FALSE	3.30364	5.08415e-11	TRUE	-2.64767	9.27349e-06	TRUE	0.874018	0.136219	FALSE	3.52169	1.01524e-13	TRUE
chr20_19737065_19737416	chr20	19737065	19737416	+	Intergenic	-149281	54453	RIN2	2.89705	7.24488e-09	TRUE	1.44709	0.0788107	FALSE	3.31023	4.07602e-13	TRUE	-1.44996	0.00041431	TRUE	0.413179	0.520458	FALSE	1.86314	1.63896e-07	TRUE
chr6_159956299_159956503	chr6	159956299	159956503	+	Intergenic	-12698	3482	IGF2R	3.04205	6.21e-05	TRUE	-1.76639	0.493707	FALSE	3.30266	1.24779e-06	TRUE	-4.80845	6.50254e-08	TRUE	0.260602	0.799489	FALSE	5.06905	2.86771e-10	TRUE
chr9_5459400_5459722	chr9	5459400	5459722	+	intron (NR_052005, intron 3 of 7)	9058	29126	CD274	3.12822	7.96791e-13	TRUE	0.971491	0.288401	FALSE	3.30141	1.07192e-15	TRUE	-2.15673	1.20378e-09	TRUE	0.173183	0.797709	FALSE	2.32991	2.03623e-12	TRUE
chr7_141585818_141586493	chr7	141585818	141586493	+	intron (NM_018238, intron 2 of 15)	34877	55750	AGK	2.92739	7.31767e-08	TRUE	1.66658	0.0517039	FALSE	3.30128	2.23613e-11	TRUE	-1.26081	0.00452971	TRUE	0.373896	0.59315	FALSE	1.6347	1.11614e-05	TRUE
chr1_92538805_92539060	chr1	92538805	92539060	+	intron (NM_001350198, intron 19 of 19)	-52056	2672	GFI1	2.89417	6.94478e-08	TRUE	-0.246202	0.899989	FALSE	3.3246	4.28496e-12	TRUE	-3.14037	7.91018e-10	TRUE	0.430435	0.499105	FALSE	3.5708	4.45625e-15	TRUE
chr4_165613024_165613323	chr4	165613024	165613323	+	Intergenic	-71466	101928151	LINC01179	3.04097	6.19548e-05	TRUE	1.08404	0.526807	FALSE	3.30088	1.24676e-06	TRUE	-1.95693	0.0018023	TRUE	0.259912	0.79981	FALSE	2.21684	3.85e-05	TRUE
chr2_100001174_100001464	chr2	100001174	100001464	+	intron (NM_001025108, intron 6 of 23)	104264	3899	AFF3	3.303	3.28557e-06	TRUE	0.920429	0.618659	FALSE	3.30054	1.0325e-06	TRUE	-2.38257	3.68741e-05	TRUE	-0.00246409	0.9983	FALSE	2.38011	1.21332e-05	TRUE
chr4_14882261_14882615	chr4	14882261	14882615	+	intron (NR_126435, intron 1 of 6)	5731	201853	LINC00504	3.62301	4.50219e-08	TRUE	-0.0303942	0.992151	FALSE	3.30052	1.0325e-06	TRUE	-3.65341	1.59971e-09	TRUE	-0.322494	0.69964	FALSE	3.33091	8.13295e-08	TRUE
chr12_62640901_62641152	chr12	62640901	62641152	+	Intergenic	37340	406891	MIRLET7I	2.94318	0.000137386	TRUE	1.0848	0.525714	FALSE	3.30052	1.0325e-06	TRUE	-1.85838	0.00395206	TRUE	0.357339	0.705841	FALSE	2.21572	3.1772e-05	TRUE
chr12_24838579_24838818	chr12	24838579	24838818	+	intron (NM_001178091, intron 6 of 9)	63690	586	BCAT1	2.89121	1.6929e-06	TRUE	0.755478	0.592551	FALSE	3.23558	3.90006e-09	TRUE	-2.13574	3.78871e-05	TRUE	0.344363	0.685752	FALSE	2.4801	7.76903e-08	TRUE
chr17_69551304_69551533	chr17	69551304	69551533	+	3' UTR (NM_001330450, exon 12 of 12)	-42569	101928122	LINC01483	2.46247	0.00459029	TRUE	0.734871	0.71891	FALSE	3.30039	1.06417e-06	TRUE	-1.7276	0.0315563	TRUE	0.837918	0.305932	FALSE	2.56551	4.33854e-06	TRUE
chr8_70614976_70615380	chr8	70614976	70615380	+	intron (NR_038881, intron 1 of 3)	6601	286190	LACTB2-AS1	3.06593	1.4308e-05	TRUE	1.49908	0.240848	FALSE	3.30007	3.88346e-07	TRUE	-1.56685	0.00792933	TRUE	0.234141	0.828939	FALSE	1.80099	0.000417586	TRUE
chr1_234501092_234501422	chr1	234501092	234501422	+	Intergenic	-22154	6894	TARBP1	3.2627	5.478e-13	TRUE	2.28913	0.000111996	TRUE	3.29964	3.14462e-14	TRUE	-0.973577	0.0053666	FALSE	0.0369361	0.966308	FALSE	1.01051	0.00146394	TRUE
chr9_68979595_68979720	chr9	68979595	68979720	+	intron (NM_001278253, intron 13 of 13)	-3816	101927069	LOC101927069	2.72097	0.000947129	TRUE	1.36457	0.370776	FALSE	3.29881	1.51185e-06	TRUE	-1.3564	0.0637291	FALSE	0.57784	0.510062	FALSE	1.93424	0.000245898	TRUE
chr3_195468125_195468357	chr3	195468125	195468357	+	Intergenic	-25153	23527	ACAP2	2.66126	0.00135409	TRUE	0.92015	0.619833	FALSE	3.29868	1.26674e-06	TRUE	-1.74111	0.0180398	TRUE	0.637421	0.456505	FALSE	2.37853	1.53408e-05	TRUE
chr17_49515226_49515565	chr17	49515226	49515565	+	TTS (NM_002507)	4578	102465141	MIR6165	2.89091	0.000220307	TRUE	2.13902	0.0592026	FALSE	3.06106	1.64073e-05	TRUE	-0.751884	0.318124	FALSE	0.170155	0.887548	FALSE	0.922039	0.0837936	FALSE
chr16_21274274_21274451	chr16	21274274	21274451	+	intron (NM_001888, intron 5 of 9)	-26487	400508	CRYM-AS1	3.2007	5.92441e-07	TRUE	2.13922	0.0275565	TRUE	3.29715	4.11328e-08	TRUE	-1.06148	0.0372396	TRUE	0.0964492	0.924314	FALSE	1.15793	0.00741391	TRUE
chr14_75487430_75487655	chr14	75487430	75487655	+	Intergenic	-34899	10538	BATF	2.89062	2.31636e-06	TRUE	0.666568	0.678115	FALSE	3.19588	6.24922e-09	TRUE	-2.22406	1.80885e-05	TRUE	0.305253	0.701649	FALSE	2.52931	3.04594e-08	TRUE
chr9_114894939_114895109	chr9	114894939	114895109	+	intron (NM_001252290, intron 4 of 4)	35571	944	TNFSF8	2.59763	0.00236319	TRUE	2.69346	0.00521418	TRUE	3.29479	2.05081e-06	TRUE	0.095835	0.9434	FALSE	0.697159	0.43086	FALSE	0.601324	0.245485	FALSE
chr1_172838335_172838701	chr1	172838335	172838701	+	Intergenic	179510	356	FASLG	3.29424	1.76695e-08	TRUE	1.36466	0.238909	FALSE	3.29433	4.41983e-09	TRUE	-1.92958	2.42076e-05	TRUE	9.14294e-05	0.999912	FALSE	1.92967	8.18838e-06	TRUE
chr7_44617588_44617860	chr7	44617588	44617860	+	intron (NM_001003941, intron 1 of 8)	11202	4967	OGDH	2.50006	0.000735171	TRUE	0.841261	0.607375	FALSE	3.29427	2.18e-08	TRUE	-1.6588	0.0115655	TRUE	0.794212	0.249626	FALSE	2.45301	2.34946e-07	TRUE
chr17_40283772_40284009	chr17	40283772	40284009	+	Intergenic	-4004	990	CDC6	2.88048	4.01721e-06	TRUE	0.653397	0.67075	FALSE	3.46473	4.24098e-10	TRUE	-2.22708	4.65831e-05	TRUE	0.58425	0.443358	FALSE	2.81133	3.3782e-09	TRUE
chr4_89081217_89081430	chr4	89081217	89081430	+	Intergenic	-24128	10144	FAM13A	2.87854	3.72762e-07	TRUE	1.39769	0.166167	FALSE	2.61666	4.10922e-06	TRUE	-1.48085	0.00113982	TRUE	-0.261882	0.76244	FALSE	1.21897	0.00797542	TRUE
chr2_215363110_215363361	chr2	215363110	215363361	+	intron (NM_212478, intron 44 of 45)	51279	471	ATIC	3.26367	8.01127e-06	TRUE	0.27222	0.917729	FALSE	3.29337	1.83906e-06	TRUE	-2.99145	3.95827e-06	TRUE	0.0297038	0.98201	FALSE	3.02115	7.47982e-07	TRUE
chr12_108573374_108573602	chr12	108573374	108573602	+	Intergenic	12025	23479	ISCU	2.869	3.17446e-05	TRUE	0.69331	0.699064	FALSE	3.29308	4.50702e-08	TRUE	-2.17569	0.000225875	TRUE	0.424078	0.599495	FALSE	2.59977	1.8865e-07	TRUE
chr6_105646387_105646818	chr6	105646387	105646818	+	Intergenic	-243478	5550	PREP	2.83583	5.55618e-12	TRUE	1.04295	0.17206	FALSE	3.29219	1.1456e-18	TRUE	-1.79288	9.52166e-08	TRUE	0.456364	0.351344	FALSE	2.24925	5.76313e-14	TRUE
chr6_69843268_69843545	chr6	69843268	69843545	+	Intergenic	-23150	1310	COL19A1	2.87583	3.24729e-05	TRUE	-0.803612	0.726901	FALSE	2.98199	3.37908e-06	TRUE	-3.67945	2.27688e-07	TRUE	0.106159	0.925686	FALSE	3.78561	1.16794e-08	TRUE
chr7_66886286_66886530	chr7	66886286	66886530	+	Intergenic	-17712	644794	LOC644794	3.02569	5.53811e-06	TRUE	0.344199	0.87762	FALSE	3.29039	4.62837e-08	TRUE	-2.68149	4.79084e-06	TRUE	0.264697	0.769071	FALSE	2.94619	1.90566e-08	TRUE
chr1_186865262_186865620	chr1	186865262	186865620	+	intron (NM_024420, intron 2 of 17)	36541	5321	PLA2G4A	3.53971	1.12085e-10	TRUE	0.535552	0.759498	FALSE	3.29036	2.53622e-09	TRUE	-3.00416	1.14707e-10	TRUE	-0.249353	0.747929	FALSE	2.7548	4.28908e-09	TRUE
chr6_16950913_16951276	chr6	16950913	16951276	+	Intergenic	-151164	401236	STMND1	3.45236	9.74291e-07	TRUE	1.48705	0.307618	FALSE	3.29022	2.07002e-06	TRUE	-1.96531	0.000289659	TRUE	-0.162142	0.882089	FALSE	1.80317	0.000676025	TRUE
chr12_2543919_2544220	chr12	2543919	2544220	+	intron (NM_001129844, intron 9 of 46)	128151	100874235	CACNA1C-AS2	2.19157	0.00234862	TRUE	1.7729	0.0671578	FALSE	3.28955	1.21499e-09	TRUE	-0.418672	0.655321	FALSE	1.09798	0.0747483	FALSE	1.51665	0.000113553	TRUE
chr18_76374701_76375240	chr18	76374701	76375240	+	intron (NM_014643, intron 4 of 6)	-116682	101927989	LOC101927989	3.01557	4.54543e-07	TRUE	0.667142	0.678195	FALSE	3.28878	1.35402e-09	TRUE	-2.34843	3.0571e-06	TRUE	0.273207	0.732964	FALSE	2.62164	5.76752e-09	TRUE
chr11_102611446_102611619	chr11	102611446	102611619	+	intron (NM_004771, intron 3 of 9)	13800	9313	MMP20	3.01994	9.65265e-06	TRUE	1.59	0.185593	FALSE	3.28796	1.09197e-07	TRUE	-1.42994	0.0105601	TRUE	0.268019	0.780953	FALSE	1.69796	0.000300608	TRUE
chr6_135030203_135030462	chr6	135030203	135030462	+	intron (NM_006620, intron 4 of 17)	24566	10767	HBS1L	3.14219	4.5906e-06	TRUE	0.52953	0.792796	FALSE	3.28689	2.76789e-07	TRUE	-2.61266	1.16895e-05	TRUE	0.144702	0.896109	FALSE	2.75736	5.6525e-07	TRUE
chr4_26746811_26747186	chr4	26746811	26747186	+	intron (NM_018317, intron 18 of 20)	113246	105374546	LOC105374546	3.09389	1.56264e-10	TRUE	1.73362	0.0228578	TRUE	3.28618	3.62489e-13	TRUE	-1.36027	0.000255094	TRUE	0.192287	0.792275	FALSE	1.55255	3.20767e-06	TRUE
chr7_120927824_120928073	chr7	120927824	120928073	+	Intergenic	-22815	54556	ING3	2.86205	5.41258e-05	TRUE	1.09485	0.457165	FALSE	3.27049	1.67401e-07	TRUE	-1.76721	0.00319708	TRUE	0.408436	0.646025	FALSE	2.17564	1.3264e-05	TRUE
chr8_23177055_23177377	chr8	23177055	23177377	+	Intergenic	-13186	8793	TNFRSF10D	2.85874	2.93857e-06	TRUE	1.88674	0.040569	TRUE	2.12533	0.00168583	TRUE	-0.971997	0.0590772	FALSE	-0.733408	0.331188	FALSE	0.238589	0.714905	FALSE
chr22_44652410_44653274	chr22	44652410	44653274	+	Intergenic	-15705	55615	PRR5	3.06575	1.2129e-15	TRUE	0.442305	0.673232	FALSE	3.28234	6.56386e-20	TRUE	-2.62344	2.22692e-15	TRUE	0.216593	0.699378	FALSE	2.84004	6.69433e-20	TRUE
chr15_50066243_50066501	chr15	50066243	50066501	+	intron (NR_073597, intron 3 of 26)	46944	79895	ATP8B4	1.74491	0.107205	FALSE	1.89517	0.139208	FALSE	3.28183	5.14288e-06	TRUE	0.150254	0.931957	FALSE	1.53692	0.0833862	FALSE	1.38666	0.0115995	TRUE
chr1_67335500_67335621	chr1	67335500	67335621	+	intron (NM_001258216, intron 7 of 13)	28196	3595	IL12RB2	2.33653	0.00323932	TRUE	1.31766	0.323586	FALSE	3.28181	1.10281e-07	TRUE	-1.01886	0.199765	FALSE	0.945281	0.211314	FALSE	1.96414	4.32289e-05	TRUE
chr5_52771705_52771944	chr5	52771705	52771944	+	Intergenic	-16116	53918	PELO	3.58314	2.12826e-13	TRUE	1.42201	0.130948	FALSE	3.2803	3.15179e-11	TRUE	-2.16113	8.43949e-09	TRUE	-0.302839	0.654551	FALSE	1.85829	1.06686e-06	TRUE
chr14_65462389_65462786	chr14	65462389	65462786	+	intron (NM_004480, intron 2 of 9)	-8515	693210	MIR625	2.40116	1.19386e-05	TRUE	1.3063	0.13438	FALSE	3.27887	1.4569e-12	TRUE	-1.09485	0.0299969	TRUE	0.877713	0.125561	FALSE	1.97257	7.88481e-08	TRUE
chr4_35975663_35975961	chr4	35975663	35975961	+	Intergenic	268127	116984	ARAP2	2.90348	4.78677e-07	TRUE	0.13314	0.949354	FALSE	3.27854	2.64477e-10	TRUE	-2.77034	1.08775e-07	TRUE	0.375053	0.605748	FALSE	3.1454	1.69764e-11	TRUE
chr3_46294057_46294502	chr3	46294057	46294502	+	Intergenic	51898	1232	CCR3	3.35244	7.98481e-10	TRUE	1.79146	0.0463306	TRUE	3.27682	7.22461e-10	TRUE	-1.56098	0.000188598	TRUE	-0.0756217	0.93781	FALSE	1.48536	0.000210934	TRUE
chr10_96138053_96138443	chr10	96138053	96138443	+	intron (NM_001330737, intron 4 of 6)	7626	9849	ZNF518A	2.95744	2.02593e-07	TRUE	-0.0333717	0.988069	FALSE	3.2766	2.31291e-10	TRUE	-2.99081	1.22658e-08	TRUE	0.319167	0.671557	FALSE	3.30997	3.45016e-12	TRUE
chr12_112934649_112934906	chr12	112934649	112934906	+	Intergenic	-3656	4940	OAS3	2.60055	0.00232112	TRUE	0.735128	0.720577	FALSE	3.27291	2.70939e-06	TRUE	-1.86542	0.0160132	TRUE	0.672365	0.453049	FALSE	2.53778	1.28235e-05	TRUE
chr2_43149286_43149722	chr2	43149286	43149722	+	Intergenic	-47059	100506047	LINC02580	2.8571	4.56679e-06	TRUE	0.0347162	0.988308	FALSE	3.64734	1.37103e-12	TRUE	-2.82238	8.00089e-07	TRUE	0.790244	0.169395	FALSE	3.61263	9.88356e-15	TRUE
chr8_103173798_103173999	chr8	103173798	103173999	+	intron (NM_001024372, intron 1 of 1)	-1758	100499183	BAALC-AS1	1.66278	0.0749384	FALSE	1.89098	0.0742371	FALSE	3.27179	6.02017e-08	TRUE	0.228195	0.869702	FALSE	1.60901	0.0213175	TRUE	1.38081	0.00174085	TRUE
chr7_29329777_29330110	chr7	29329777	29330110	+	intron (NM_001293070, intron 2 of 13)	-120973	102724484	LOC102724484	2.85524	5.39742e-06	TRUE	1.10305	0.389108	FALSE	3.01258	2.12654e-07	TRUE	-1.75219	0.000743358	TRUE	0.157337	0.876138	FALSE	1.90952	3.95256e-05	TRUE
chr8_60467483_60467718	chr8	60467483	60467718	+	Intergenic	-49310	5862	RAB2A	2.85084	0.00332122	TRUE	-0.398433	0.907578	FALSE	3.87442	1.14323e-07	TRUE	-3.24927	0.000751401	TRUE	1.02358	0.19839	FALSE	4.27286	1.39857e-09	TRUE
chr1_38852904_38853118	chr1	38852904	38853118	+	intron (NM_022157, intron 3 of 6)	6812	64121	RRAGC	2.85037	0.00340081	TRUE	-1.22809	0.699653	FALSE	3.90825	8.22975e-08	TRUE	-4.07846	0.00013928	TRUE	1.05788	0.180668	FALSE	5.13634	8.37506e-11	TRUE
chr3_187665095_187665344	chr3	187665095	187665344	+	Intergenic	5194	6750	SST	2.84941	0.00014326	TRUE	1.41041	0.289851	FALSE	3.00149	1.4552e-05	TRUE	-1.439	0.0303007	TRUE	0.152082	0.904498	FALSE	1.59108	0.00501062	TRUE
chr6_17633501_17633802	chr6	17633501	17633802	+	intron (NM_001278209, intron 17 of 22)	33364	51439	FAM8A1	2.84497	0.00445948	TRUE	1.62181	0.354409	FALSE	4.18825	9.32793e-09	TRUE	-1.22316	0.196889	FALSE	1.34328	0.0798544	FALSE	2.56644	1.64094e-06	TRUE
chr18_49161709_49162016	chr18	49161709	49162016	+	intron (NM_001353213, intron 15 of 17)	-112094	100616420	MIR4744	2.41349	5.24268e-05	TRUE	0.889419	0.451509	FALSE	3.2686	3.05805e-11	TRUE	-1.52407	0.00383021	TRUE	0.855112	0.15279	FALSE	2.37918	3.04871e-09	TRUE
chr13_41179598_41179894	chr13	41179598	41179894	+	intron (NR_120423, intron 3 of 3)	14838	84078	KBTBD7	2.66165	0.0015346	TRUE	1.70527	0.203654	FALSE	3.26855	2.69633e-06	TRUE	-0.95638	0.241496	FALSE	0.6069	0.501213	FALSE	1.56328	0.00287916	TRUE
chr1_165633663_165633889	chr1	165633663	165633889	+	intron (NM_004528, intron 1 of 5)	2903	4259	MGST3	2.46023	0.000141029	TRUE	1.39487	0.181288	FALSE	3.26846	1.18351e-09	TRUE	-1.06536	0.0790585	FALSE	0.808234	0.229286	FALSE	1.87359	7.69808e-06	TRUE
chr4_75172573_75172997	chr4	75172573	75172997	+	Intergenic	-88077	105377283	LINC02562	2.46434	5.81724e-08	TRUE	0.906103	0.288392	FALSE	3.26807	2.73498e-17	TRUE	-1.55824	5.31012e-05	TRUE	0.803727	0.0747805	FALSE	2.36196	5.8586e-14	TRUE
chr2_136017907_136018126	chr2	136017907	136018126	+	Intergenic	-32332	1615	DARS	2.78754	6.43476e-05	TRUE	1.21037	0.378899	FALSE	3.26802	5.00061e-08	TRUE	-1.57717	0.00706882	TRUE	0.480482	0.53558	FALSE	2.05765	9.27194e-06	TRUE
chr4_81906073_81906351	chr4	81906073	81906351	+	Intergenic	-434284	153020	RASGEF1B	2.7796	0.000655235	TRUE	2.06152	0.0810819	FALSE	3.26796	2.53788e-06	TRUE	-0.71808	0.390024	FALSE	0.488364	0.602744	FALSE	1.20644	0.0184764	TRUE
chr6_144722967_144723214	chr6	144722967	144723214	+	intron (NM_007124, intron 52 of 73)	317435	106635530	SNORA98	2.85049	0.00019194	TRUE	0.972763	0.548295	FALSE	3.26796	1.49193e-06	TRUE	-1.87773	0.00547684	TRUE	0.417465	0.694423	FALSE	2.29519	5.28217e-05	TRUE
chr14_75673420_75673703	chr14	75673420	75673703	+	intron (NM_015072, intron 3 of 31)	12353	23093	TTLL5	2.46094	0.00523076	TRUE	1.60327	0.250869	FALSE	3.26781	2.73414e-06	TRUE	-0.857666	0.35603	FALSE	0.806869	0.357981	FALSE	1.66454	0.00166367	TRUE
chr3_152127026_152127467	chr3	152127026	152127467	+	Intergenic	78183	101928166	LOC101928166	2.97986	1.38317e-13	TRUE	0.773586	0.364476	FALSE	3.26736	4.10697e-18	TRUE	-2.20628	8.32257e-11	TRUE	0.287502	0.617739	FALSE	2.49378	3.02431e-15	TRUE
chr1_206680426_206680641	chr1	206680426	206680641	+	Intergenic	-4487	9261	MAPKAPK2	2.84459	1.42721e-06	TRUE	1.63489	0.0838453	FALSE	2.93738	1.21031e-07	TRUE	-1.2097	0.014766	TRUE	0.0927948	0.928923	FALSE	1.3025	0.00278693	TRUE
chr12_131091385_131091646	chr12	131091385	131091646	+	intron (NM_198827, intron 15 of 24)	-73496	116437	LINC01257	2.84427	1.81876e-06	TRUE	0.843451	0.525917	FALSE	3.09288	1.59049e-08	TRUE	-2.00082	7.25307e-05	TRUE	0.248613	0.784034	FALSE	2.24943	6.68622e-07	TRUE
chr1_16727355_16727710	chr1	16727355	16727710	+	Intergenic	6929	729587	FAM231C	2.36764	2.8203e-05	TRUE	-0.120095	0.950084	FALSE	3.26694	2.04597e-12	TRUE	-2.48773	3.22643e-06	TRUE	0.899303	0.104046	FALSE	3.38703	6.38188e-15	TRUE
chr5_68372145_68372419	chr5	68372145	68372419	+	Intergenic	79714	5295	PIK3R1	2.66818	0.00158467	TRUE	1.60233	0.253312	FALSE	3.26683	3.28596e-06	TRUE	-1.06585	0.184403	FALSE	0.598651	0.514392	FALSE	1.6645	0.0019088	TRUE
chr13_103277191_103277373	chr13	103277191	103277373	+	Intergenic	-147918	104326190	LINC01309	2.20729	0.00559428	TRUE	0.841093	0.607527	FALSE	3.26554	3.50537e-08	TRUE	-1.3662	0.0730863	FALSE	1.05825	0.122444	FALSE	2.42444	4.04042e-07	TRUE
chr3_16596709_16596909	chr3	16596709	16596909	+	exon (NM_001190811, exon 6 of 11)	7981	1618	DAZL	2.4964	0.000957498	TRUE	1.41047	0.270033	FALSE	3.265	8.7074e-08	TRUE	-1.08593	0.126979	FALSE	0.768608	0.306616	FALSE	1.85454	6.81845e-05	TRUE
chr4_121706634_121707007	chr4	121706634	121707007	+	Intergenic	-9828	308	ANXA5	2.83811	2.98976e-08	TRUE	-0.43585	0.797915	FALSE	3.37658	7.64264e-14	TRUE	-3.27396	5.67514e-11	TRUE	0.538475	0.346996	FALSE	3.81243	4.64805e-18	TRUE
chr1_40628522_40628788	chr1	40628522	40628788	+	intron (NM_014747, intron 7 of 7)	36997	9783	RIMS3	2.78132	0.000550631	TRUE	1.80406	0.158146	FALSE	3.2644	1.75736e-06	TRUE	-0.977266	0.187723	FALSE	0.483082	0.593843	FALSE	1.46035	0.00375972	TRUE
chr4_77593201_77593344	chr4	77593201	77593344	+	intron (NM_006419, intron 1 of 4)	81519	10563	CXCL13	2.72281	0.000824412	TRUE	0.920446	0.618659	FALSE	3.26335	1.62783e-06	TRUE	-1.80236	0.0112113	TRUE	0.540539	0.537123	FALSE	2.3429	2.00402e-05	TRUE
chr1_107623064_107623242	chr1	107623064	107623242	+	intron (NM_001079874, intron 3 of 9)	65351	10451	VAV3	2.23118	0.01536	TRUE	2.69162	0.00427804	TRUE	3.26333	1.62783e-06	TRUE	0.460436	0.639316	FALSE	1.03215	0.206197	FALSE	0.571711	0.250318	FALSE
chr12_27556027_27556217	chr12	27556027	27556217	+	intron (NM_001198915, intron 1 of 26)	32010	8496	PPFIBP1	2.99341	8.77574e-05	TRUE	1.36619	0.366681	FALSE	3.26329	1.62802e-06	TRUE	-1.62722	0.00933064	TRUE	0.269886	0.791566	FALSE	1.89711	0.000271926	TRUE
chr6_89475795_89475972	chr6	89475795	89475972	+	intron (NM_001242813, intron 1 of 14)	42705	22881	ANKRD6	2.23124	0.01536	TRUE	1.89524	0.125773	FALSE	3.26326	1.62818e-06	TRUE	-0.336004	0.795045	FALSE	1.03201	0.206199	FALSE	1.36802	0.00597746	TRUE
chr3_122081597_122081854	chr3	122081597	122081854	+	intron (NM_176892, intron 1 of 5)	3876	942	CD86	2.01028	0.00185327	TRUE	0.813531	0.505546	FALSE	3.26156	1.40584e-11	TRUE	-1.19675	0.0554195	FALSE	1.25128	0.0216847	TRUE	2.44803	5.9576e-10	TRUE
chr10_124306852_124307157	chr10	124306852	124307157	+	Intergenic	111972	4942	OAT	2.8376	0.000382178	TRUE	1.80304	0.160189	FALSE	3.50421	9.20782e-08	TRUE	-1.03456	0.151336	FALSE	0.666608	0.398818	FALSE	1.70117	0.000327353	TRUE
chr4_84681495_84681789	chr4	84681495	84681789	+	intron (NM_014991, intron 64 of 67)	98738	1040	CDS1	2.99138	0.000123885	TRUE	3.05033	0.000347535	TRUE	3.2613	2.95232e-06	TRUE	0.0589458	0.962377	FALSE	0.269925	0.801168	FALSE	0.210979	0.716312	FALSE
chr15_50137463_50137568	chr15	50137463	50137568	+	Intergenic	-18293	79895	ATP8B4	1.32733	0.272484	FALSE	1.48703	0.306682	FALSE	3.25989	2.75331e-06	TRUE	0.159697	0.935128	FALSE	1.93256	0.0221138	TRUE	1.77286	0.00087464	TRUE
chr2_218230942_218231193	chr2	218230942	218231193	+	intron (NM_152862, intron 4 of 10)	13670	10109	ARPC2	2.59915	0.000138772	TRUE	2.47144	0.00197851	TRUE	3.2576	1.75581e-08	TRUE	-0.127715	0.908903	FALSE	0.65845	0.38243	FALSE	0.786165	0.0746172	FALSE
chr3_50212057_50212317	chr3	50212057	50212317	+	intron (NM_006841, intron 1 of 15)	6941	10991	SLC38A3	3.16683	2.04496e-06	TRUE	1.10123	0.453721	FALSE	3.25728	2.1002e-07	TRUE	-2.0656	0.000145525	TRUE	0.0904483	0.935523	FALSE	2.15605	1.78543e-05	TRUE
chr7_124893193_124893794	chr7	124893193	124893794	+	intron (NM_001042594, intron 5 of 17)	-36380	401398	POT1-AS1	2.91134	6.55122e-08	TRUE	1.86789	0.0155751	TRUE	3.25667	5.44071e-11	TRUE	-1.04345	0.0261258	TRUE	0.345326	0.654394	FALSE	1.38877	0.000308256	TRUE
chr3_137989007_137989340	chr3	137989007	137989340	+	Intergenic	-9643	51208	CLDN18	3.12635	1.20669e-05	TRUE	0.139288	0.95661	FALSE	3.256	1.05144e-06	TRUE	-2.98707	5.16078e-06	TRUE	0.129642	0.91487	FALSE	3.11671	3.19062e-07	TRUE
chr16_67437615_67437794	chr16	67437615	67437794	+	TTS (NM_000196)	6571	3291	HSD11B2	2.83715	0.000342446	TRUE	1.08477	0.525714	FALSE	3.30049	1.03258e-06	TRUE	-1.75238	0.00931479	TRUE	0.463337	0.602914	FALSE	2.21571	3.1772e-05	TRUE
chr6_83847278_83847572	chr6	83847278	83847572	+	Intergenic	-5841	134701	RIPPLY2	2.837	0.000354296	TRUE	1.23215	0.44227	FALSE	3.30096	1.1141e-06	TRUE	-1.60485	0.0174462	TRUE	0.46396	0.605135	FALSE	2.06881	8.29549e-05	TRUE
chr15_85710490_85710834	chr15	85710490	85710834	+	intron (NM_007200, intron 19 of 36)	48063	101929679	LOC101929679	2.7921	1.34854e-07	TRUE	0.919005	0.397034	FALSE	3.24746	7.59077e-12	TRUE	-1.87309	2.54703e-05	TRUE	0.455359	0.483976	FALSE	2.32845	1.93936e-09	TRUE
chr1_24277553_24277939	chr1	24277553	24277939	+	Intergenic	-41576	57822	GRHL3	2.92778	4.09099e-06	TRUE	-0.427817	0.846958	FALSE	3.24531	1.56914e-08	TRUE	-3.35559	6.22896e-08	TRUE	0.317528	0.716606	FALSE	3.67312	5.59185e-11	TRUE
chr6_150749359_150749588	chr6	150749359	150749588	+	intron (NM_001029884, intron 3 of 16)	28540	57480	PLEKHG1	2.83683	0.000360725	TRUE	0.522043	0.821276	FALSE	3.33605	7.43763e-07	TRUE	-2.31479	0.000953235	TRUE	0.49922	0.567664	FALSE	2.814	8.90557e-07	TRUE
chr3_136109551_136109831	chr3	136109551	136109831	+	intron (NM_181897, intron 12 of 12)	84777	55167	MSL2	2.71798	1.83476e-05	TRUE	1.19621	0.325447	FALSE	3.24352	2.46642e-09	TRUE	-1.52177	0.0041112	TRUE	0.525532	0.446116	FALSE	2.0473	1.09852e-06	TRUE
chr6_134979210_134979471	chr6	134979210	134979471	+	promoter-TSS (NR_037435)	92	100500880	MIR3662	2.27256	0.00440391	TRUE	0.529652	0.789086	FALSE	3.24298	1.18343e-07	TRUE	-1.74291	0.020156	TRUE	0.970419	0.18993	FALSE	2.71333	1.916e-07	TRUE
chr3_122146417_122146846	chr3	122146417	122146846	+	Intergenic	-37052	846	CASR	2.27586	0.000211112	TRUE	2.61797	3.63476e-05	TRUE	3.24188	2.20258e-10	TRUE	0.34211	0.672142	FALSE	0.966025	0.144382	FALSE	0.623914	0.142485	FALSE
chr4_99944132_99944322	chr4	99944132	99944322	+	intron (NM_001031723, intron 1 of 7)	2499	79982	DNAJB14	2.83103	9.69657e-06	TRUE	0.220585	0.917554	FALSE	2.74624	8.91619e-06	TRUE	-2.61045	5.99972e-06	TRUE	-0.0847948	0.943004	FALSE	2.52566	5.97428e-06	TRUE
chr3_188750722_188750889	chr3	188750722	188750889	+	intron (NM_001167672, intron 6 of 9)	62024	407020	MIR28	1.92214	0.026619	TRUE	1.31511	0.318336	FALSE	3.24088	8.85857e-08	TRUE	-0.607027	0.579328	FALSE	1.31875	0.0637606	FALSE	1.92577	3.5049e-05	TRUE
chr6_158207481_158207754	chr6	158207481	158207754	+	Intergenic	39270	404672	GTF2H5	2.78825	6.82094e-05	TRUE	1.31557	0.317956	FALSE	3.23964	8.84029e-08	TRUE	-1.47268	0.012491	TRUE	0.451387	0.57659	FALSE	1.92407	3.51614e-05	TRUE
chr2_136015697_136015991	chr2	136015697	136015991	+	Intergenic	-30160	1615	DARS	2.83009	3.70832e-05	TRUE	0.84093	0.608159	FALSE	2.98102	2.15698e-06	TRUE	-1.98916	0.000587658	TRUE	0.150936	0.889534	FALSE	2.14009	3.41402e-05	TRUE
chr1_76191693_76191946	chr1	76191693	76191946	+	intron (NM_001349108, intron 1 of 3)	117135	256435	ST6GALNAC3	3.0357	0.00010872	TRUE	1.79968	0.169421	FALSE	3.23866	5.94299e-06	TRUE	-1.23602	0.0653046	FALSE	0.202965	0.862767	FALSE	1.43899	0.0082627	TRUE
chr9_126872587_126872830	chr9	126872587	126872830	+	intron (NM_001099270, intron 1 of 1)	12043	403341	ZBTB34	2.8299	3.44244e-05	TRUE	0.130773	0.957902	FALSE	2.435	0.000524572	TRUE	-2.69912	1.33869e-05	TRUE	-0.394897	0.680273	FALSE	2.30423	0.000387558	TRUE
chr17_30352277_30352613	chr17	30352277	30352613	+	Intergenic	-18386	388364	TMIGD1	3.5685	2.73738e-09	TRUE	1.21032	0.381946	FALSE	3.23586	1.29361e-07	TRUE	-2.35818	4.08942e-07	TRUE	-0.332643	0.670261	FALSE	2.02553	2.36526e-05	TRUE
chr21_45266611_45267060	chr21	45266611	45267060	+	3' UTR (NM_015227, exon 8 of 8)	21078	23275	POFUT2	2.82414	5.38149e-08	TRUE	0.351011	0.821134	FALSE	2.70865	9.27011e-08	TRUE	-2.47313	6.65306e-08	TRUE	-0.115487	0.900392	FALSE	2.35764	1.4706e-07	TRUE
chr9_82726525_82727038	chr9	82726525	82727038	+	Intergenic	336347	158158	RASEF	2.84974	3.11124e-07	TRUE	2.03153	0.00679203	TRUE	3.23516	2.25032e-10	TRUE	-0.818209	0.127055	FALSE	0.385417	0.625556	FALSE	1.20363	0.00280791	TRUE
chr12_94269690_94269944	chr12	94269690	94269944	+	intron (NR_037687, intron 2 of 11)	7296	10154	PLXNC1	2.82323	7.51434e-06	TRUE	1.10501	0.387241	FALSE	3.34064	1.01258e-09	TRUE	-1.71822	0.00102829	TRUE	0.517416	0.457686	FALSE	2.23563	1.91195e-07	TRUE
chr22_33380862_33381182	chr22	33380862	33381182	+	intron (NM_133642, intron 9 of 14)	55647	100616295	MIR4764	1.84851	0.0744206	FALSE	1.08304	0.531143	FALSE	3.23471	4.55847e-06	TRUE	-0.76547	0.553809	FALSE	1.3862	0.106969	FALSE	2.15167	0.000145025	TRUE
chr15_52013121_52013342	chr15	52013121	52013342	+	Intergenic	-5983	5597	MAPK6	2.60162	0.00235239	TRUE	1.60145	0.252723	FALSE	3.23437	4.42112e-06	TRUE	-1.00016	0.232698	FALSE	0.632748	0.492261	FALSE	1.63291	0.00244042	TRUE
chr11_85947855_85948254	chr11	85947855	85948254	+	Intergenic	92953	220047	CCDC83	2.64001	2.81749e-06	TRUE	1.80331	0.0252489	TRUE	3.23325	3.06813e-11	TRUE	-0.836705	0.106667	FALSE	0.593231	0.33936	FALSE	1.42994	7.27783e-05	TRUE
chr16_75462946_75463145	chr16	75462946	75463145	+	intron (NM_001304998, intron 1 of 2)	1371	124491	TMEM170A	2.81886	3.68085e-07	TRUE	1.52695	0.0915337	FALSE	3.04456	2.89918e-09	TRUE	-1.29191	0.00511759	TRUE	0.225697	0.793469	FALSE	1.51761	0.000143434	TRUE
chr13_23321690_23321869	chr13	23321690	23321869	+	intron (NM_000231, intron 7 of 7)	53764	26278	SACS	3.30063	5.28099e-06	TRUE	-1.76582	0.494751	FALSE	3.22882	3.94715e-06	TRUE	-5.06645	2.26731e-09	TRUE	-0.0718049	0.953989	FALSE	4.99464	1.52466e-09	TRUE
chr7_36115433_36116063	chr7	36115433	36116063	+	Intergenic	20438	101928618	LOC101928618	2.81797	3.14942e-10	TRUE	2.19565	6.66623e-05	TRUE	2.9783	1.84282e-12	TRUE	-0.622315	0.139795	FALSE	0.160334	0.82977	FALSE	0.782649	0.0175808	FALSE
chr19_49849025_49849256	chr19	49849025	49849256	+	intron (NR_040037, intron 1 of 3)	-1595	53635	PTOV1	2.82179	1.44775e-06	TRUE	0.851562	0.516675	FALSE	3.22684	6.58317e-10	TRUE	-1.97022	6.34477e-05	TRUE	0.405053	0.57649	FALSE	2.37528	2.60562e-08	TRUE
chr12_80778130_80778513	chr12	80778130	80778513	+	Intergenic	15167	101928420	LINC01490	2.48076	0.000236832	TRUE	0.903563	0.519536	FALSE	3.22632	4.7655e-09	TRUE	-1.5772	0.00796324	TRUE	0.74556	0.263669	FALSE	2.32276	1.64458e-07	TRUE
chr2_85865532_85865826	chr2	85865532	85865826	+	intron (NM_001354224, intron 1 of 7)	1991	8869	ST3GAL5	2.80308	9.17512e-07	TRUE	1.84963	0.024764	TRUE	3.26488	1.85941e-10	TRUE	-0.953447	0.0640295	FALSE	0.461802	0.520257	FALSE	1.41525	0.000309238	TRUE
chrX_148466297_148466648	chrX	148466297	148466648	+	Intergenic	-34147	2334	AFF2	1.7371	0.099573	FALSE	1.36617	0.366681	FALSE	3.22508	2.58486e-06	TRUE	-0.370935	0.811498	FALSE	1.48798	0.0692961	FALSE	1.85891	0.000419364	TRUE
chr8_38186697_38187139	chr8	38186697	38187139	+	intron (NM_001204878, intron 1 of 3)	-10188	27257	LSM1	2.79961	1.39381e-05	TRUE	1.19891	0.331961	FALSE	3.19931	2.12098e-08	TRUE	-1.6007	0.003137	TRUE	0.399699	0.623133	FALSE	2.0004	9.00322e-06	TRUE
chr12_92065685_92065991	chr12	92065685	92065991	+	intron (NR_046160, intron 1 of 5)	75875	256021	LINC01619	2.79879	2.2268e-08	TRUE	2.13914	0.000782556	TRUE	3.11665	1.256e-11	TRUE	-0.659645	0.170834	FALSE	0.317868	0.652146	FALSE	0.977513	0.00561475	FALSE
chr12_12486709_12487082	chr12	12486709	12487082	+	intron (NM_030640, intron 5 of 6)	75619	80824	DUSP16	2.79377	4.98077e-07	TRUE	0.432354	0.783397	FALSE	3.16378	3.08109e-10	TRUE	-2.36141	1.31388e-06	TRUE	0.370016	0.613972	FALSE	2.73143	3.8154e-10	TRUE
chr18_3715435_3715697	chr18	3715435	3715697	+	intron (NM_001242766, intron 4 of 10)	111829	84777	DLGAP1-AS2	3.1342	2.25298e-05	TRUE	1.36635	0.367219	FALSE	3.22502	2.74143e-06	TRUE	-1.76785	0.00283205	TRUE	0.0908207	0.937819	FALSE	1.85867	0.000445185	TRUE
chr1_168504023_168504335	chr1	168504023	168504335	+	Intergenic	-8535	101928565	LOC101928565	2.99304	9.03798e-05	TRUE	1.60132	0.246307	FALSE	3.22494	2.71677e-06	TRUE	-1.39173	0.0275116	TRUE	0.231895	0.826105	FALSE	1.62362	0.00169437	TRUE
chr4_105194827_105195203	chr4	105194827	105195203	+	intron (NM_017628, intron 2 of 2)	48330	54790	TET2	2.91957	1.84012e-10	TRUE	1.16993	0.164815	FALSE	3.22491	2.39435e-14	TRUE	-1.74964	2.34309e-06	TRUE	0.305339	0.624878	FALSE	2.05498	8.3953e-10	TRUE
chr15_42010591_42010840	chr15	42010591	42010840	+	intron (NM_001206670, intron 2 of 19)	37952	101928388	PLA2G4E-AS1	2.69316	0.000214244	TRUE	0.341576	0.879219	FALSE	3.22491	1.98828e-07	TRUE	-2.35158	0.000328906	TRUE	0.531748	0.51432	FALSE	2.88333	1.06818e-07	TRUE
chr1_108063741_108064072	chr1	108063741	108064072	+	Intergenic	-98983	10451	VAV3	2.14525	0.022819	TRUE	2.47182	0.0148286	TRUE	3.22488	2.76446e-06	TRUE	0.326574	0.782992	FALSE	1.07963	0.195414	FALSE	0.75306	0.133036	FALSE
chr9_130095944_130096358	chr9	130095944	130096358	+	intron (NM_001136557, intron 9 of 19)	42445	57720	GPR107	2.79298	9.07512e-07	TRUE	1.10924	0.327771	FALSE	2.10823	0.000705946	TRUE	-1.68374	0.000282403	TRUE	-0.684751	0.336909	FALSE	0.99899	0.0669062	FALSE
chr5_109162135_109162377	chr5	109162135	109162377	+	intron (NM_001308031, intron 8 of 10)	164113	285638	LOC285638	1.73702	0.100817	FALSE	1.23243	0.442934	FALSE	3.22365	3.11197e-06	TRUE	-0.504592	0.733175	FALSE	1.48662	0.073887	FALSE	1.99121	0.000232299	TRUE
chr2_102367436_102367716	chr2	102367436	102367716	+	intron (NM_001282399, intron 2 of 10)	11293	8809	IL18R1	2.38703	0.000267705	TRUE	1.78788	0.0474646	TRUE	3.22356	1.90777e-09	TRUE	-0.599148	0.421933	FALSE	0.836529	0.213172	FALSE	1.43568	0.000422148	TRUE
chr16_57602008_57602478	chr16	57602008	57602478	+	Intergenic	-17450	9289	ADGRG1	2.74497	5.05876e-09	TRUE	1.42102	0.0609555	FALSE	3.22056	1.82971e-14	TRUE	-1.32395	0.000546867	TRUE	0.475585	0.391752	FALSE	1.79954	2.48382e-08	TRUE
chr3_144295263_144295484	chr3	144295263	144295484	+	Intergenic	322048	205428	C3orf58	2.66667	0.00179551	TRUE	1.22816	0.452133	FALSE	3.21912	7.34729e-06	TRUE	-1.43851	0.0644994	FALSE	0.552446	0.576365	FALSE	1.99096	0.000507702	TRUE
chr3_119601226_119601506	chr3	119601226	119601506	+	intron (NM_001293225, intron 1 of 10)	1095	51365	PLA1A	2.61349	0.000781653	TRUE	2.61124	0.00359601	TRUE	3.21846	1.15448e-06	TRUE	-0.00224973	0.998875	FALSE	0.604974	0.508624	FALSE	0.607224	0.254464	FALSE
chr10_114337382_114337827	chr10	114337382	114337827	+	intron (NM_001001936, intron 2 of 18)	67174	84632	AFAP1L2	2.55173	0.000667309	TRUE	1.21194	0.382421	FALSE	3.21783	2.0764e-07	TRUE	-1.33979	0.0479917	TRUE	0.666108	0.402163	FALSE	2.00589	3.76108e-05	TRUE
chr11_76673560_76673750	chr11	76673560	76673750	+	Intergenic	-2908	2615	LRRC32	3.0468	1.37995e-08	TRUE	1.04394	0.344612	FALSE	3.21225	1.68046e-10	TRUE	-2.00285	5.32901e-06	TRUE	0.165446	0.852781	FALSE	2.1683	8.74605e-08	TRUE
chr1_157856498_157856913	chr1	157856498	157856913	+	Intergenic	-14861	922	CD5L	2.79286	2.69616e-07	TRUE	0.198484	0.913673	FALSE	2.90542	1.14762e-08	TRUE	-2.59438	9.6297e-08	TRUE	0.112559	0.90166	FALSE	2.70694	2.84217e-09	TRUE
chr6_144460420_144460788	chr6	144460420	144460788	+	intron (NM_007124, intron 20 of 73)	54949	106635530	SNORA98	3.21504	2.02662e-07	TRUE	0.66788	0.686025	FALSE	3.21152	6.97318e-08	TRUE	-2.54716	1.39518e-06	TRUE	-0.00352428	0.997403	FALSE	2.54364	5.14807e-07	TRUE
chr2_196783511_196784026	chr2	196783511	196784026	+	intron (NM_012086, intron 8 of 17)	16000	9330	GTF3C3	2.79104	2.23135e-06	TRUE	1.68837	0.0660822	FALSE	3.09507	6.80314e-09	TRUE	-1.10267	0.0285616	TRUE	0.304025	0.710094	FALSE	1.4067	0.000535553	TRUE
chr2_30260121_30260324	chr2	30260121	30260324	+	TTS (NM_030915)	28691	81606	LBH	2.79003	1.68375e-05	TRUE	1.10255	0.393105	FALSE	2.82537	4.10197e-06	TRUE	-1.68748	0.002063	TRUE	0.035345	0.97868	FALSE	1.72282	0.000628182	TRUE
chr1_114756070_114756406	chr1	114756070	114756406	+	intron (NM_001007553, intron 1 of 19)	1812	7812	CSDE1	2.73294	2.13995e-07	TRUE	0.450486	0.753891	FALSE	3.20874	7.94566e-12	TRUE	-2.28246	7.82663e-07	TRUE	0.475794	0.452907	FALSE	2.75825	1.1273e-11	TRUE
chr22_36873940_36874303	chr22	36873940	36874303	+	intron (NM_013416, intron 7 of 8).2	-3678	107985578	NCF4-AS1	2.3384	0.00397664	TRUE	1.75534	0.128605	FALSE	3.2086	7.70338e-07	TRUE	-0.583061	0.556007	FALSE	0.870196	0.299219	FALSE	1.45326	0.00384868	TRUE
chr10_88755783_88756069	chr10	88755783	88756069	+	Intergenic	-5480	643418	LIPN	1.75891	0.0594064	FALSE	0.842399	0.61608	FALSE	3.2083	6.7357e-07	TRUE	-0.916514	0.408756	FALSE	1.44939	0.0684101	FALSE	2.3659	1.0585e-05	TRUE
chr21_34967547_34967939	chr21	34967547	34967939	+	intron (NM_001754, intron 2 of 8)	71683	80215	RUNX1-IT1	2.0109	0.00195336	TRUE	1.75649	0.0325415	TRUE	3.2072	6.42998e-11	TRUE	-0.254411	0.797422	FALSE	1.19631	0.03516	TRUE	1.45072	7.58875e-05	TRUE
chr18_58971458_58971729	chr18	58971458	58971729	+	intron (NR_148459, intron 9 of 11)	-64086	390858	OACYLP	2.33164	0.002505	TRUE	0.343746	0.876982	FALSE	3.20716	8.1982e-08	TRUE	-1.9879	0.00551636	TRUE	0.875515	0.218118	FALSE	2.86341	3.47629e-08	TRUE
chr8_33569909_33570113	chr8	33569909	33570113	+	Intergenic	-2883	79845	RNF122	2.78859	6.39109e-05	TRUE	1.50442	0.217378	FALSE	2.98283	2.53788e-06	TRUE	-1.28417	0.0301162	TRUE	0.194241	0.854791	FALSE	1.47841	0.00254185	TRUE
chr6_22064614_22064876	chr6	22064614	22064876	+	intron (NR_015410, intron 8 of 11)	82448	729177	NBAT1	1.99844	0.0176577	TRUE	-0.804918	0.724794	FALSE	3.20698	8.78074e-08	TRUE	-2.80336	0.00161074	TRUE	1.20854	0.0818193	FALSE	4.01189	7.88772e-11	TRUE
chr8_58845405_58845719	chr8	58845405	58845719	+	intron (NM_014729, intron 4 of 8)	-185717	8439	NSMAF	2.31883	0.000297299	TRUE	0.632758	0.655779	FALSE	3.20552	1.90417e-09	TRUE	-1.68607	0.00423944	TRUE	0.886694	0.201547	FALSE	2.57276	2.04108e-08	TRUE
chr1_89781502_89782077	chr1	89781502	89782077	+	Intergenic	-39225	55144	LRRC8D	2.953	8.82967e-15	TRUE	1.97363	7.58468e-05	TRUE	3.205	1.76407e-19	TRUE	-0.979368	0.000889482	FALSE	0.251998	0.629778	FALSE	1.23137	1.70695e-06	TRUE
chr12_101850272_101850562	chr12	101850272	101850562	+	Intergenic	-19550	79158	GNPTAB	2.39002	0.00182726	TRUE	0.13042	0.95799	FALSE	3.20415	1.23233e-07	TRUE	-2.2596	0.00167217	TRUE	0.814131	0.266614	FALSE	3.07373	1.60433e-08	TRUE
chr2_69453563_69453840	chr2	69453563	69453840	+	Intergenic	-16073	27247	NFU1	3.39283	6.91382e-09	TRUE	1.71458	0.0942484	FALSE	3.20291	3.47858e-08	TRUE	-1.67825	0.000183331	TRUE	-0.18992	0.83791	FALSE	1.48833	0.000804939	TRUE
chr3_191355502_191355770	chr3	191355502	191355770	+	intron (NM_178335, intron 1 of 11)	-25100	257313	UTS2B	2.88584	1.87532e-07	TRUE	0.0638128	0.975086	FALSE	3.20236	2.77127e-10	TRUE	-2.82202	2.50395e-08	TRUE	0.316523	0.685658	FALSE	3.13855	1.30531e-11	TRUE
chr10_13183703_13183994	chr10	13183703	13183994	+	intron (NM_182751, intron 8 of 19)	22294	55388	MCM10	3.06456	6.39489e-09	TRUE	1.17948	0.254782	FALSE	3.20212	1.12482e-10	TRUE	-1.88508	9.17298e-06	TRUE	0.137556	0.875788	FALSE	2.02264	2.51389e-07	TRUE
chr6_143647252_143647479	chr6	143647252	143647479	+	intron (NM_001100166, intron 1 of 11)	-30600	9749	PHACTR2	2.78831	2.81852e-06	TRUE	0.647548	0.663422	FALSE	2.40234	8.17159e-05	TRUE	-2.14077	3.00476e-05	TRUE	-0.385973	0.661957	FALSE	1.75479	0.00107147	TRUE
chr14_73290347_73290576	chr14	73290347	73290576	+	intron (NM_001005743, intron 8 of 12)	-44460	101928123	LOC101928123	2.38148	0.000928147	TRUE	0.791876	0.604606	FALSE	3.2013	5.10334e-08	TRUE	-1.5896	0.0162197	TRUE	0.819822	0.273517	FALSE	2.40942	8.99163e-07	TRUE
chr1_236457867_236458118	chr1	236457867	236458118	+	intron (NM_080738, intron 4 of 5)	-60222	3964	LGALS8	2.78729	5.63116e-05	TRUE	-0.421297	0.863351	FALSE	3.08261	5.50562e-07	TRUE	-3.20859	2.04864e-06	TRUE	0.295322	0.74918	FALSE	3.50391	5.24934e-09	TRUE
chr4_77588892_77589053	chr4	77588892	77589053	+	intron (NM_006419, intron 1 of 4)	77219	10563	CXCL13	2.73469	0.000234161	TRUE	1.31686	0.331209	FALSE	3.19912	8.42394e-07	TRUE	-1.41784	0.0312875	TRUE	0.46443	0.620403	FALSE	1.88227	0.000270973	TRUE
chr6_166417230_166417471	chr6	166417230	166417471	+	intron (NM_001006932, intron 20 of 21)	-34337	51660	MPC1	2.78635	6.17515e-05	TRUE	-2.15753	0.337182	FALSE	3.50318	8.28049e-10	TRUE	-4.94387	9.70138e-09	TRUE	0.716833	0.272018	FALSE	5.66071	1.23072e-15	TRUE
chr2_142974394_142974718	chr2	142974394	142974718	+	intron (NM_001032998, intron 8 of 11)	96930	8942	KYNU	2.78164	0.000122862	TRUE	2.2442	0.0200516	TRUE	3.21172	3.86545e-07	TRUE	-0.537438	0.508599	FALSE	0.430081	0.633811	FALSE	0.96752	0.0426241	FALSE
chr5_134071284_134071802	chr5	134071284	134071802	+	Intergenic	-43155	6932	TCF7	3.27533	1.57009e-16	TRUE	0.136051	0.926733	FALSE	3.19496	2.29242e-16	TRUE	-3.13928	1.13941e-18	TRUE	-0.0803695	0.909679	FALSE	3.05891	3.22207e-18	TRUE
chr21_14616412_14616630	chr21	14616412	14616630	+	intron (NM_001256579, intron 1 of 6)	26586	388813	LOC388813	2.39007	0.00232948	TRUE	2.19763	0.0237309	TRUE	3.19479	4.05023e-07	TRUE	-0.192433	0.874989	FALSE	0.80472	0.314254	FALSE	0.997154	0.0355254	FALSE
chr7_148447375_148447732	chr7	148447375	148447732	+	Intergenic	-143012	202865	C7orf33	2.89284	0.000276557	TRUE	0.523408	0.821455	FALSE	3.19462	5.93566e-06	TRUE	-2.36944	0.000728415	TRUE	0.301773	0.780917	FALSE	2.67121	1.05113e-05	TRUE
chr2_69345536_69345772	chr2	69345536	69345772	+	intron (NM_001244710, intron 12 of 19)	41600	2673	GFPT1	2.66024	0.00158024	TRUE	-0.0304493	0.992151	FALSE	3.19422	6.51317e-06	TRUE	-2.69069	0.000751234	TRUE	0.533983	0.579217	FALSE	3.22467	8.90557e-07	TRUE
chr7_37816052_37816359	chr7	37816052	37816359	+	Intergenic	-32392	51314	NME8	2.77849	0.000726205	TRUE	1.98042	0.105435	FALSE	3.71922	8.4788e-09	TRUE	-0.798074	0.332788	FALSE	0.940726	0.197662	FALSE	1.7388	0.00014155	TRUE
chr11_94469507_94469857	chr11	94469507	94469857	+	intron (NM_005591, intron 9 of 19)	-3102	100302275	MIR548L	3.36293	1.80874e-10	TRUE	0.280003	0.882159	FALSE	3.19214	1.09275e-09	TRUE	-3.08293	3.44884e-11	TRUE	-0.170788	0.836327	FALSE	2.91214	2.86771e-10	TRUE
chr21_15560691_15561039	chr21	15560691	15561039	+	Intergenic	-169069	29761	USP25	2.8974	8.97623e-05	TRUE	0.52584	0.796985	FALSE	3.1906	2.11728e-06	TRUE	-2.37156	0.000307227	TRUE	0.293193	0.79385	FALSE	2.66476	5.64646e-06	TRUE
chr11_82995850_82996284	chr11	82995850	82996284	+	intron (NM_001286060, intron 2 of 4)	38502	27314	RAB30	2.93599	9.70743e-17	TRUE	1.58469	0.0021883	TRUE	3.19043	6.20034e-22	TRUE	-1.3513	7.88184e-07	TRUE	0.254437	0.602947	FALSE	1.60574	1.36287e-10	TRUE
chr1_119347810_119348286	chr1	119347810	119348286	+	intron (NR_146623, intron 2 of 3)	19796	105378934	LINC01780	2.91547	1.10212e-11	TRUE	1.44127	0.035929	TRUE	3.18932	1.65343e-15	TRUE	-1.4742	1.8668e-05	TRUE	0.273847	0.659334	FALSE	1.74805	1.91395e-08	TRUE
chr9_27499580_27499788	chr9	27499580	27499788	+	intron (NM_024761, intron 1 of 3)	-24630	56832	IFNK	2.99257	0.000105308	TRUE	1.60144	0.249003	FALSE	3.18921	5.20415e-06	TRUE	-1.39112	0.0303626	TRUE	0.196643	0.861376	FALSE	1.58777	0.00287718	TRUE
chr3_143832055_143832221	chr3	143832055	143832221	+	exon (NM_173653, exon 2 of 16)	16393	285195	SLC9A9	2.9466	0.000180391	TRUE	1.48843	0.306659	FALSE	3.18892	6.46034e-06	TRUE	-1.45817	0.0284546	TRUE	0.242319	0.827897	FALSE	1.70049	0.00185767	TRUE
chr13_66507062_66507284	chr13	66507062	66507284	+	intron (NM_203487, intron 4 of 4)	288923	100616205	MIR4704	2.53192	0.00308487	TRUE	-0.0303467	0.992151	FALSE	3.18686	4.4398e-06	TRUE	-2.56226	0.00172246	TRUE	0.654941	0.460939	FALSE	3.21721	5.19685e-07	TRUE
chr9_68545316_68545626	chr9	68545316	68545626	+	intron (NR_109769, intron 3 of 3)	1131	101927015	LINC01506	3.04101	7.94921e-08	TRUE	0.854808	0.51629	FALSE	3.18672	1.8378e-09	TRUE	-2.1862	3.37039e-06	TRUE	0.145713	0.874822	FALSE	2.33191	8.13295e-08	TRUE
chr5_170907885_170908164	chr5	170907885	170908164	+	intron (NM_022897, intron 5 of 27)	46142	64901	RANBP17	2.77641	0.00110244	TRUE	2.46355	0.022426	TRUE	3.33984	3.90358e-06	TRUE	-0.312854	0.789878	FALSE	0.563435	0.572958	FALSE	0.876289	0.11216	FALSE
chr9_115205244_115205449	chr9	115205244	115205449	+	intron (NM_017418, intron 1 of 7)	63528	50514	2018-12-01	1.85041	0.0700884	FALSE	1.48866	0.301338	FALSE	3.1859	4.08063e-06	TRUE	-0.361749	0.808506	FALSE	1.33549	0.109356	FALSE	1.69724	0.00128297	TRUE
chr2_111091873_111092140	chr2	111091873	111092140	+	intron (NM_001142807, intron 16 of 17)	23582	400997	ACOXL-AS1	1.16626	0.357798	FALSE	0.521973	0.821134	FALSE	3.18588	4.08063e-06	TRUE	-0.64429	0.72164	FALSE	2.01962	0.0179348	TRUE	2.66391	6.40914e-06	TRUE
chr8_25198929_25199225	chr8	25198929	25199225	+	intron (NM_001322810, intron 1 of 3)	14354	80005	DOCK5	2.7228	0.000824412	TRUE	0.521961	0.821134	FALSE	3.18583	4.08081e-06	TRUE	-2.20084	0.00245745	TRUE	0.463026	0.62214	FALSE	2.66387	6.40914e-06	TRUE
chr6_55868896_55869405	chr6	55868896	55869405	+	intron (NM_001329754, intron 1 of 5)	6440	653	BMP5	2.14501	0.0226224	TRUE	0.521956	0.821134	FALSE	3.18572	4.08427e-06	TRUE	-1.62306	0.0828976	FALSE	1.04071	0.216902	FALSE	2.66377	6.41277e-06	TRUE
chr10_11236408_11236579	chr10	11236408	11236579	+	intron (NM_001025077, intron 3 of 12)	71463	10659	CELF2	3.04279	6.0609e-05	TRUE	1.08495	0.526366	FALSE	3.18564	4.75009e-06	TRUE	-1.95783	0.00177223	TRUE	0.142856	0.899747	FALSE	2.10069	0.000154054	TRUE
chr11_93740114_93740316	chr11	93740114	93740316	+	intron (NR_146090, intron 1 of 13)	1322	79101	TAF1D	3.22115	8.65823e-06	TRUE	1.08479	0.525835	FALSE	3.18555	4.21493e-06	TRUE	-2.13637	0.00025206	TRUE	-0.0356002	0.978475	FALSE	2.10077	0.000136757	TRUE
chr1_186183263_186183499	chr1	186183263	186183499	+	intron (NM_031935, intron 105 of 106)	-112892	10216	PRG4	2.76963	0.00508718	TRUE	0.507995	0.859262	FALSE	3.55564	4.86232e-06	TRUE	-2.26163	0.0128932	TRUE	0.786012	0.399319	FALSE	3.04764	4.44803e-06	TRUE
chr14_21414109_21414643	chr14	21414109	21414643	+	exon (NM_001170629, exon 8 of 37)	-16975	319103	SNORD8	2.61199	1.07058e-05	TRUE	0.674109	0.594212	FALSE	3.18457	2.6735e-09	TRUE	-1.93789	0.000322353	TRUE	0.572572	0.481537	FALSE	2.51046	9.07807e-08	TRUE
chr2_207521588_207521891	chr2	207521588	207521891	+	Intergenic	-8153	1385	CREB1	2.82772	8.46873e-06	TRUE	0.222171	0.91705	FALSE	3.18453	2.05224e-08	TRUE	-2.60555	5.15086e-06	TRUE	0.356811	0.665433	FALSE	2.96236	4.68234e-09	TRUE
chr6_135640753_135641071	chr6	135640753	135641071	+	intron (NR_152845, intron 2 of 4)	143111	100131814	LINC00271	2.95964	3.55618e-06	TRUE	1.82497	0.0650933	FALSE	3.18321	6.23606e-08	TRUE	-1.13467	0.0376745	TRUE	0.223566	0.82162	FALSE	1.35823	0.00260499	TRUE
chr2_60361888_60362046	chr2	60361888	60362046	+	intron (NR_132992, intron 1 of 1)	21069	106660609	MIR4432HG	2.76963	0.00508718	TRUE	1.06037	0.624029	FALSE	3.46323	1.25989e-05	TRUE	-1.70926	0.0563171	FALSE	0.693601	0.479377	FALSE	2.40286	0.000143344	TRUE
chr22_46561633_46561767	chr22	46561633	46561767	+	Intergenic	-24530	9620	CELSR1	2.52859	0.00349365	TRUE	1.23152	0.445957	FALSE	3.18275	6.5847e-06	TRUE	-1.29707	0.111247	FALSE	0.654156	0.477998	FALSE	1.95122	0.000475573	TRUE
chr1_248793642_248793904	chr1	248793642	248793904	+	Intergenic	31593	80851	SH3BP5L	2.44126	0.000168566	TRUE	1.58293	0.104112	FALSE	3.18223	4.52733e-09	TRUE	-0.85833	0.1845	FALSE	0.740975	0.289575	FALSE	1.59931	0.000137636	TRUE
chr7_99637423_99637739	chr7	99637423	99637739	+	intron (NM_001350984, intron 7 of 7)	20633	221785	ZSCAN25	2.98372	1.15691e-06	TRUE	0.901355	0.524265	FALSE	3.18033	2.00018e-08	TRUE	-2.08237	4.23624e-05	TRUE	0.196609	0.830909	FALSE	2.27897	7.40024e-07	TRUE
chrX_10357058_10357338	chrX	10357058	10357338	+	Intergenic	200253	1183	CLCN4	2.75367	2.15798e-05	TRUE	2.3485	0.00398138	TRUE	3.18014	2.66761e-08	TRUE	-0.405162	0.603543	FALSE	0.426473	0.594458	FALSE	0.831635	0.0532342	FALSE
chr11_77217179_77217482	chr11	77217179	77217482	+	intron (NM_182833, intron 16 of 16)	84336	220032	GDPD4	2.76918	4.01554e-07	TRUE	2.10385	0.00370631	TRUE	2.27921	6.65488e-05	TRUE	-0.665327	0.200185	FALSE	-0.489966	0.50737	FALSE	0.175361	0.758501	FALSE
chr17_82039071_82039268	chr17	82039071	82039268	+	Intergenic	-1472	51181	DCXR	3.21128	2.25361e-05	TRUE	0.520128	0.82336	FALSE	3.17945	1.13886e-05	TRUE	-2.69115	4.2496e-05	TRUE	-0.0318258	0.982166	FALSE	2.65932	2.2064e-05	TRUE
chr4_144374116_144374487	chr4	144374116	144374487	+	Intergenic	-233515	2993	GYPA	2.76561	1.2405e-06	TRUE	1.36236	0.161809	FALSE	2.59936	3.73379e-06	TRUE	-1.40325	0.00367274	TRUE	-0.166253	0.870595	FALSE	1.237	0.00847889	TRUE
chr2_136375578_136375867	chr2	136375578	136375867	+	Intergenic	-257567	7852	CXCR4	2.95946	9.8005e-10	TRUE	1.21986	0.167331	FALSE	3.17865	1.94388e-12	TRUE	-1.7396	9.15688e-06	TRUE	0.219192	0.768961	FALSE	1.95879	4.17181e-08	TRUE
chr5_138408094_138408377	chr5	138408094	138408377	+	intron (NM_016604, intron 11 of 23)	-30766	51308	REEP2	2.91113	1.67349e-05	TRUE	0.69371	0.697941	FALSE	3.17778	1.72631e-07	TRUE	-2.21742	0.000112468	TRUE	0.266655	0.771296	FALSE	2.48407	8.48764e-07	TRUE
chr5_125220392_125220669	chr5	125220392	125220669	+	intron (NR_109882, intron 4 of 5)	183699	101927421	LOC101927421	2.53333	4.47715e-05	TRUE	0.131753	0.949672	FALSE	3.17756	1.57933e-09	TRUE	-2.40157	2.44335e-05	TRUE	0.644235	0.339536	FALSE	3.04581	1.34521e-10	TRUE
chr19_17065069_17065295	chr19	17065069	17065295	+	intron (NM_001011699, intron 3 of 10)	10351	93323	HAUS8	2.76053	1.98026e-06	TRUE	0.325449	0.850618	FALSE	3.07284	7.04293e-09	TRUE	-2.43508	3.02498e-06	TRUE	0.312315	0.718302	FALSE	2.7474	5.99424e-09	TRUE
chr8_103481993_103482261	chr8	103481993	103482261	+	non-coding (NR_145697, exon 5 of 5)	17104	105375690	LOC105375690	2.72069	1.9986e-05	TRUE	0.790707	0.595186	FALSE	3.17338	1.10722e-08	TRUE	-1.92998	0.000384675	TRUE	0.452691	0.539812	FALSE	2.38267	1.59984e-07	TRUE
chr1_26702703_26702929	chr1	26702703	26702929	+	intron (NM_139135, intron 1 of 19)	6783	8289	ARID1A	3.0182	2.0213e-08	TRUE	2.06873	0.00594068	TRUE	3.17166	3.42847e-10	TRUE	-0.94947	0.0368173	FALSE	0.153457	0.862485	FALSE	1.10293	0.00393145	TRUE
chr2_98474047_98474257	chr2	98474047	98474257	+	intron (NM_001351427, intron 1 of 25)	28142	3631	INPP4A	2.71931	1.57153e-05	TRUE	0.902951	0.517064	FALSE	3.17094	6.44283e-09	TRUE	-1.81635	0.000597905	TRUE	0.451632	0.523316	FALSE	2.26799	2.21794e-07	TRUE
chr6_135922123_135922518	chr6	135922123	135922518	+	intron (NM_018945, intron 1 of 12)	70624	27115	PDE7B	2.5213	0.000137337	TRUE	0.0356358	0.988012	FALSE	3.16916	7.50273e-09	TRUE	-2.48566	4.87046e-05	TRUE	0.647864	0.340315	FALSE	3.13353	3.13509e-10	TRUE
chr2_33488313_33488587	chr2	33488313	33488587	+	intron (NM_001349977, intron 2 of 18)	12196	25780	RASGRP3	2.92456	1.56163e-06	TRUE	-0.728391	0.721842	FALSE	3.16861	1.0707e-08	TRUE	-3.65295	3.4135e-09	TRUE	0.244055	0.775178	FALSE	3.897	4.64284e-12	TRUE
chr9_106981406_106981995	chr9	106981406	106981995	+	intron (NR_126029, intron 4 of 4)	118603	58499	ZNF462	2.75895	1.79508e-15	TRUE	-0.444871	0.666213	FALSE	2.96719	9.68469e-20	TRUE	-3.20382	1.56626e-21	TRUE	0.208244	0.693487	FALSE	3.41207	5.97872e-27	TRUE
chr20_49805290_49805697	chr20	49805290	49805697	+	Intergenic	-7220	23315	SLC9A8	2.55557	8.35572e-08	TRUE	0.78046	0.424289	FALSE	3.16804	4.48702e-14	TRUE	-1.77511	1.49028e-05	TRUE	0.612474	0.261571	FALSE	2.38758	1.11126e-11	TRUE
chr8_47598131_47598419	chr8	47598131	47598419	+	intron (NR_104581, intron 7 of 16)	-55813	23514	SPIDR	2.75531	1.12931e-05	TRUE	-0.177627	0.938857	FALSE	2.95577	2.40966e-07	TRUE	-2.93293	7.27196e-07	TRUE	0.200466	0.829555	FALSE	3.1334	5.98035e-09	TRUE
chr12_68119302_68119525	chr12	68119302	68119525	+	Intergenic	40328	3458	IFNG	2.5054	0.00133634	TRUE	2.19045	0.0277587	TRUE	3.16705	1.18185e-06	TRUE	-0.31495	0.775851	FALSE	0.661649	0.452907	FALSE	0.976599	0.0526714	FALSE
chr6_69985232_69985471	chr6	69985232	69985471	+	intron (NM_001858, intron 11 of 50)	118795	1310	COL19A1	2.24054	0.0030674	TRUE	0.664637	0.689734	FALSE	3.16641	1.99524e-07	TRUE	-1.5759	0.0292287	TRUE	0.925874	0.24152	FALSE	2.50177	1.5598e-06	TRUE
chr11_102279684_102279963	chr11	102279684	102279963	+	Intergenic	-37627	330	BIRC3	2.755	1.33624e-05	TRUE	0.902773	0.519546	FALSE	2.63253	1.84034e-05	TRUE	-1.85222	0.000506179	TRUE	-0.122472	0.909412	FALSE	1.72975	0.000774674	TRUE
chr18_54149106_54149584	chr18	54149106	54149584	+	Intergenic	73067	677819	SNORA37	2.63929	8.39501e-05	TRUE	1.8835	0.0491985	TRUE	3.16417	5.07383e-08	TRUE	-0.75579	0.26084	FALSE	0.52488	0.505226	FALSE	1.28067	0.00365752	TRUE
chr22_28714113_28714380	chr22	28714113	28714380	+	intron (NM_001349956, intron 4 of 13)	27588	11200	CHEK2	2.75498	9.95872e-06	TRUE	-2.465	0.22691	FALSE	3.06724	3.50908e-08	TRUE	-5.21999	1.14707e-10	TRUE	0.312256	0.699914	FALSE	5.53224	2.36305e-14	TRUE
chr9_5455306_5455465	chr9	5455306	5455465	+	intron (NM_001267706, intron 1 of 5)	4882	29126	CD274	2.59682	0.000107328	TRUE	1.28106	0.28376	FALSE	3.16397	3.2396e-08	TRUE	-1.31577	0.0258766	TRUE	0.567144	0.453407	FALSE	1.88291	2.61378e-05	TRUE
chr7_2851499_2851796	chr7	2851499	2851796	+	Intergenic	-7322	2768	GNA12	2.75454	1.40559e-05	TRUE	1.51229	0.157946	FALSE	2.903	7.129e-07	TRUE	-1.24225	0.0200755	TRUE	0.148459	0.887293	FALSE	1.39071	0.00224463	TRUE
chr10_112442131_112442358	chr10	112442131	112442358	+	exon (NM_001303134, exon 4 of 11)	4715	64429	ZDHHC6	2.61305	6.19104e-05	TRUE	-2.7128	0.15657	FALSE	3.1637	3.57004e-08	TRUE	-5.32585	6.59717e-10	TRUE	0.550659	0.502631	FALSE	5.87651	1.2972e-14	TRUE
chr2_101402684_101402914	chr2	101402684	101402914	+	intron (NM_001145664, intron 10 of 11)	-15296	200407	CREG2	2.74299	5.46456e-05	TRUE	0.383322	0.846651	FALSE	3.02228	1.08716e-06	TRUE	-2.35967	0.000112715	TRUE	0.279289	0.790953	FALSE	2.63896	1.55499e-06	TRUE
chr4_2936153_2936393	chr4	2936153	2936393	+	non-coding (NR_015453, exon 1 of 4)	727	317648	NOP14-AS1	2.3565	3.7014e-05	TRUE	0.780017	0.504168	FALSE	3.16039	3.86407e-11	TRUE	-1.57648	0.00191089	TRUE	0.803892	0.18008	FALSE	2.38037	2.21843e-09	TRUE
chr4_145828910_145829171	chr4	145828910	145829171	+	intron (NM_001306215, intron 7 of 14)	109920	152485	ZNF827	2.74258	9.27502e-05	TRUE	0.130593	0.957909	FALSE	3.20704	1.01613e-07	TRUE	-2.61198	4.37295e-05	TRUE	0.464466	0.557971	FALSE	3.07645	1.25288e-08	TRUE
chr3_187870331_187870877	chr3	187870331	187870877	+	Intergenic	105803	105374266	LINC01991	2.38351	2.74621e-13	TRUE	1.13043	0.0249645	TRUE	3.1571	6.74133e-29	TRUE	-1.25308	3.28743e-06	TRUE	0.773593	0.0146699	FALSE	2.02667	2.24504e-19	TRUE
chr5_116365079_116365425	chr5	116365079	116365425	+	Intergenic	9318	101927190	LOC101927190	3.1418	4.24719e-05	TRUE	0.921613	0.623713	FALSE	3.15538	1.37898e-05	TRUE	-2.22019	0.000563427	TRUE	0.013583	0.991619	FALSE	2.23377	0.000196766	TRUE
chr2_3202460_3202666	chr2	3202460	3202666	+	intron (NM_001330530, intron 6 of 9)	-76537	101927554	LINC01250	2.73861	0.0481126	TRUE	1.37672	0.60972	FALSE	4.55258	1.35346e-07	TRUE	-1.36189	0.340532	FALSE	1.81397	0.0344841	TRUE	3.17585	8.11199e-07	TRUE
chr11_18768458_18768850	chr11	18768458	18768850	+	intron (NM_001278239, intron 1 of 13)	23188	84867	PTPN5	2.73846	1.87656e-09	TRUE	2.29689	1.8082e-05	TRUE	3.06302	2.64509e-13	TRUE	-0.441565	0.377472	FALSE	0.324564	0.603705	FALSE	0.766129	0.0182465	FALSE
chr1_26580864_26581188	chr1	26580864	26581188	+	Intergenic	26484	100302190	MIR1976	2.7437	6.15403e-07	TRUE	1.41747	0.12685	FALSE	3.15112	1.44667e-10	TRUE	-1.32622	0.0036286	TRUE	0.407429	0.548497	FALSE	1.73365	4.2394e-06	TRUE
chr4_127698787_127699121	chr4	127698787	127699121	+	intron (NM_015693, intron 8 of 15)	-31424	83447	SLC25A31	2.73587	4.25874e-06	TRUE	2.56884	0.000148534	TRUE	3.42075	1.29146e-11	TRUE	-0.167032	0.851727	FALSE	0.684882	0.259947	FALSE	0.851914	0.0190053	FALSE
chr2_68716602_68716847	chr2	68716602	68716847	+	Intergenic	-18057	9938	ARHGAP25	2.73308	2.76334e-06	TRUE	0.414964	0.807073	FALSE	2.64782	2.70823e-06	TRUE	-2.31812	5.72303e-06	TRUE	-0.0852606	0.935119	FALSE	2.23286	6.28636e-06	TRUE
chr9_35579161_35579623	chr9	35579161	35579623	+	Intergenic	-15493	730112	FAM166B	2.26313	0.000578448	TRUE	0.847104	0.518415	FALSE	3.15038	2.13823e-09	TRUE	-1.41602	0.0185789	TRUE	0.887257	0.168518	FALSE	2.30328	8.54858e-08	TRUE
chr5_54868496_54868851	chr5	54868496	54868851	+	Intergenic	116913	11082	ESM1	2.7927	6.99284e-08	TRUE	-0.272954	0.880219	FALSE	3.15021	1.92988e-11	TRUE	-3.06565	6.01496e-10	TRUE	0.357506	0.596942	FALSE	3.42316	1.95294e-14	TRUE
chr1_54376555_54376923	chr1	54376555	54376923	+	intron (NM_001009955, intron 4 of 16)	29656	23648	SSBP3	2.73029	1.42343e-07	TRUE	0.541001	0.686689	FALSE	2.7787	1.65272e-08	TRUE	-2.18929	1.03193e-06	TRUE	0.0484153	0.96209	FALSE	2.2377	1.15268e-07	TRUE
chr17_8939980_8940175	chr17	8939980	8940175	+	intron (NM_001142633, intron 1 of 18)	25635	23533	PIK3R5	2.60541	6.55315e-05	TRUE	1.36351	0.231203	FALSE	3.14859	1.45691e-08	TRUE	-1.2419	0.0285258	TRUE	0.543177	0.449354	FALSE	1.78508	2.60782e-05	TRUE
chr8_89845126_89845337	chr8	89845126	89845337	+	Intergenic	-56637	734	OSGIN2	2.72981	0.00155047	TRUE	2.0613	0.0935223	FALSE	3.50897	7.30633e-07	TRUE	-0.668502	0.490941	FALSE	0.779165	0.389794	FALSE	1.44767	0.00633797	TRUE
chr2_64738140_64738452	chr2	64738140	64738452	+	Intergenic	-84384	9792	SERTAD2	2.74316	9.53372e-05	TRUE	1.59001	0.175057	FALSE	3.14775	2.61176e-07	TRUE	-1.15315	0.0579767	FALSE	0.404588	0.632113	FALSE	1.55774	0.000693723	TRUE
chr5_102778472_102778917	chr5	102778472	102778917	+	intron (NM_001319943, intron 1 of 26)	23911	5066	PAM	2.50649	6.1385e-07	TRUE	1.71486	0.0126619	TRUE	3.14731	1.84282e-12	TRUE	-0.791623	0.110492	FALSE	0.640818	0.292143	FALSE	1.43244	5.12033e-05	TRUE
chr1_199942109_199942370	chr1	199942109	199942370	+	Intergenic	-85363	2494	NR5A2	2.52263	0.000123287	TRUE	0.533831	0.757163	FALSE	3.14626	8.26695e-09	TRUE	-1.9888	0.000590139	TRUE	0.623626	0.358235	FALSE	2.61243	1.41949e-08	TRUE
chr2_135525877_135526047	chr2	135525877	135526047	+	intron (NM_032143, intron 1 of 20)	4768	84083	ZRANB3	2.98936	5.58141e-06	TRUE	-2.15737	0.336723	FALSE	3.14607	2.03469e-07	TRUE	-5.14673	3.30043e-10	TRUE	0.156712	0.873703	FALSE	5.30344	2.39577e-12	TRUE
chr2_173149670_173149870	chr2	173149670	173149870	+	intron (NM_133646, intron 2 of 11)	73933	51776	MAP3K20	2.33166	0.002505	TRUE	-0.804767	0.724774	FALSE	3.14602	2.03528e-07	TRUE	-3.13643	8.88835e-05	TRUE	0.814361	0.266413	FALSE	3.95079	2.35244e-10	TRUE
chr1_244150776_244151018	chr1	244150776	244151018	+	Intergenic	97692	10472	ZBTB18	2.72278	0.000838459	TRUE	1.89514	0.126073	FALSE	3.14596	6.63068e-06	TRUE	-0.827637	0.299281	FALSE	0.423176	0.665767	FALSE	1.25081	0.0163048	TRUE
chr1_108533671_108533990	chr1	108533671	108533990	+	Intergenic	-26519	284611	FAM102B	2.31242	0.0103806	TRUE	0.734876	0.718963	FALSE	3.14571	6.69578e-06	TRUE	-1.57754	0.068354	FALSE	0.833293	0.344164	FALSE	2.41083	3.38241e-05	TRUE
chrX_96838581_96838811	chrX	96838581	96838811	+	intron (NM_007309, intron 4 of 26)	-45212	29935	RPA4	1.7371	0.099573	FALSE	0.521978	0.821134	FALSE	3.14552	6.42513e-06	TRUE	-1.21513	0.307866	FALSE	1.40841	0.0974273	FALSE	2.62354	1.09605e-05	TRUE
chr2_37377220_37377486	chr2	37377220	37377486	+	Intergenic	32743	25797	QPCT	2.72902	1.26603e-09	TRUE	1.34751	0.0620042	FALSE	3.18546	6.77212e-15	TRUE	-1.38151	0.000215645	TRUE	0.45644	0.425324	FALSE	1.83795	1.35495e-08	TRUE
chr2_54573008_54573107	chr2	54573008	54573107	+	intron (NM_178313, intron 1 of 30)	14663	6711	SPTBN1	2.14488	0.0226959	TRUE	1.98107	0.0988285	FALSE	3.14549	6.52901e-06	TRUE	-0.16381	0.913334	FALSE	1.00061	0.243739	FALSE	1.16442	0.0245758	TRUE
chr11_34352215_34352367	chr11	34352215	34352367	+	intron (NM_145804, intron 1 of 16)	5717	25841	ABTB2	2.31252	0.0102647	TRUE	0.521961	0.821134	FALSE	3.14546	6.42513e-06	TRUE	-1.79056	0.0376745	TRUE	0.832944	0.342254	FALSE	2.6235	1.09605e-05	TRUE
chr1_172845458_172845716	chr1	172845458	172845716	+	Intergenic	186579	356	FASLG	2.66206	0.00126826	TRUE	1.60154	0.245751	FALSE	3.14544	6.42513e-06	TRUE	-1.06053	0.168153	FALSE	0.483381	0.61013	FALSE	1.54391	0.00350204	TRUE
chr6_27791303_27791441	chr6	27791303	27791441	+	Intergenic	16559	8340	HIST1H2BL	2.46266	0.00455692	TRUE	1.7062	0.197213	FALSE	3.14543	6.42513e-06	TRUE	-0.756462	0.418615	FALSE	0.682769	0.446341	FALSE	1.43923	0.0060606	TRUE
chr4_85783517_85783729	chr4	85783517	85783729	+	intron (NM_001042669, intron 1 of 7)	4925	83478	ARHGAP24	2.31258	0.0102647	TRUE	1.23235	0.441692	FALSE	3.14541	6.42513e-06	TRUE	-1.08023	0.237115	FALSE	0.832832	0.342254	FALSE	1.91306	0.00047279	TRUE
chr9_99286591_99286856	chr9	99286591	99286856	+	Intergenic	64435	10952	SEC61B	1.73708	0.099573	FALSE	0.272061	0.917326	FALSE	3.14541	6.42513e-06	TRUE	-1.46502	0.203932	FALSE	1.40833	0.0974273	FALSE	2.87335	3.22927e-06	TRUE
chr12_26768967_26769219	chr12	26768967	26769219	+	intron (NM_002223, intron 2 of 56)	64105	3709	ITPR2	2.72293	0.000838717	TRUE	1.36613	0.367185	FALSE	3.145	6.70415e-06	TRUE	-1.3568	0.0590029	FALSE	0.422075	0.666963	FALSE	1.77888	0.00102187	TRUE
chr9_89731256_89731625	chr9	89731256	89731625	+	Intergenic	91657	100129066	UNQ6494	2.72314	0.00116422	TRUE	2.6881	0.00594068	TRUE	3.25575	4.34683e-06	TRUE	-0.0350408	0.980939	FALSE	0.532613	0.581237	FALSE	0.567653	0.295026	FALSE
chr5_115487840_115488101	chr5	115487840	115488101	+	Intergenic	56924	56929	FEM1C	2.59818	0.00202369	TRUE	-0.0306516	0.992151	FALSE	3.14454	7.07013e-06	TRUE	-2.62883	0.0010032	TRUE	0.54636	0.558655	FALSE	3.17519	9.22699e-07	TRUE
chr10_23365532_23365701	chr10	23365532	23365701	+	Intergenic	-20771	256815	C10orf67	2.34966	0.00477071	TRUE	0.694607	0.708108	FALSE	3.1436	3.78723e-06	TRUE	-1.65505	0.0382457	TRUE	0.793943	0.395188	FALSE	2.449	2.81061e-05	TRUE
chr22_18106432_18107177	chr22	18106432	18107177	+	Intergenic	-3883	51807	TUBA8	2.64451	3.06502e-22	TRUE	1.27991	0.000952208	TRUE	3.14323	2.77089e-36	TRUE	-1.36461	7.9776e-10	TRUE	0.498722	0.113164	FALSE	1.86333	1.51389e-20	TRUE
chr1_99752148_99752410	chr1	99752148	99752410	+	intron (NM_001361041, intron 1 of 16)	14348	391059	FRRS1	2.38463	0.000628369	TRUE	-1.11297	0.574133	FALSE	3.14246	3.14289e-08	TRUE	-3.49761	2.97852e-06	TRUE	0.757821	0.286385	FALSE	4.25543	3.27344e-12	TRUE
chr13_50255716_50255997	chr13	50255716	50255997	+	intron (NR_109974, intron 2 of 6)	83838	145165	ST13P4	2.73067	4.96191e-05	TRUE	2.04509	0.0273375	TRUE	3.14212	1.43495e-07	TRUE	-0.685576	0.330136	FALSE	0.411455	0.645511	FALSE	1.09703	0.0179842	TRUE
chr9_86348560_86348745	chr9	86348560	86348745	+	intron (NM_001185059, intron 2 of 26)	5798	79670	TUT7	1.32872	0.272358	FALSE	0.522598	0.82175	FALSE	3.14196	1.05574e-05	TRUE	-0.806118	0.619848	FALSE	1.81325	0.042123	TRUE	2.61936	2.00617e-05	TRUE
chr12_66453882_66454162	chr12	66453882	66454162	+	intron (NM_001178074, intron 10 of 22)	151477	92797	HELB	2.9914	0.000110379	TRUE	-0.0308331	0.992151	FALSE	3.1411	9.17428e-06	TRUE	-3.02223	2.63088e-05	TRUE	0.149707	0.898038	FALSE	3.17194	1.30653e-06	TRUE
chr3_101950500_101950962	chr3	101950500	101950962	+	intron (NR_026934, intron 1 of 3)	9872	152225	LINC02085	2.71991	5.73829e-07	TRUE	1.51813	0.0762285	FALSE	3.63659	3.17865e-15	TRUE	-1.20179	0.0103134	TRUE	0.916674	0.0866216	FALSE	2.11846	2.18168e-09	TRUE
chr12_55624107_55624384	chr12	55624107	55624384	+	Intergenic	-12647	121130	OR10P1	2.17227	0.000490672	TRUE	0.895733	0.444585	FALSE	3.13773	2.20258e-10	TRUE	-1.27654	0.0277549	TRUE	0.965455	0.103348	FALSE	2.24199	2.51924e-08	TRUE
chr10_6058694_6059048	chr10	6058694	6059048	+	intron (NM_000417, intron 1 of 7)	3499	3559	IL2RA	2.52526	1.1215e-09	TRUE	2.55641	3.77156e-09	TRUE	3.13576	8.58797e-18	TRUE	0.0311485	0.969876	FALSE	0.610505	0.179219	FALSE	0.579356	0.0392326	FALSE
chr14_71267010_71267486	chr14	71267010	71267486	+	Intergenic	-53222	26037	SIPA1L1	1.3456	0.284649	FALSE	3.61791	1.29315e-05	TRUE	3.13403	6.65411e-05	TRUE	2.27231	0.000342546	TRUE	1.78842	0.086081	FALSE	-0.483887	0.418826	FALSE
chr6_53239620_53239809	chr6	53239620	53239809	+	Intergenic	-37279	100847075	MIR5685	2.33119	0.00521697	TRUE	2.03194	0.0602506	FALSE	3.13393	4.48187e-06	TRUE	-0.299255	0.81049	FALSE	0.802739	0.391465	FALSE	1.10199	0.0445676	TRUE
chr16_88637302_88637453	chr16	88637302	88637453	+	Intergenic	-1216	27189	IL17C	2.71957	1.64744e-05	TRUE	0.789612	0.593831	FALSE	2.95815	2.17522e-07	TRUE	-1.92996	0.00031071	TRUE	0.238582	0.793145	FALSE	2.16854	3.89554e-06	TRUE
chr1_82446999_82447371	chr1	82446999	82447371	+	Intergenic	-455998	103283057	LINC01362	3.09302	4.65547e-06	TRUE	2.19573	0.0245897	TRUE	3.12558	1.09297e-06	TRUE	-0.897286	0.129918	FALSE	0.032562	0.980193	FALSE	0.929848	0.0576974	FALSE
chr20_15977878_15978141	chr20	15977878	15978141	+	intron (NM_001351664, intron 10 of 14)	7873	613266	LOC613266	2.71913	1.37672e-05	TRUE	0.386298	0.83984	FALSE	2.77485	2.17892e-06	TRUE	-2.33283	2.21844e-05	TRUE	0.0557284	0.960614	FALSE	2.38856	2.97541e-06	TRUE
chr11_77631037_77631295	chr11	77631037	77631295	+	intron (NM_001311200, intron 1 of 5)	6640	1207	CLNS1A	2.67338	9.69657e-06	TRUE	0.417673	0.807477	FALSE	3.1203	4.90228e-09	TRUE	-2.2557	2.51253e-05	TRUE	0.44692	0.545219	FALSE	2.70262	5.51001e-09	TRUE
chr4_76516030_76516388	chr4	76516030	76516388	+	intron (NM_020859, intron 1 of 10)	-57359	100616299	MIR4450	2.71912	1.4445e-05	TRUE	0.386332	0.839953	FALSE	2.31807	0.000332254	TRUE	-2.33279	2.35732e-05	TRUE	-0.40105	0.648946	FALSE	1.93174	0.000882373	TRUE
chr4_10730628_10730855	chr4	10730628	10730855	+	Intergenic	-45876	116449	CLNK	2.7105	4.43968e-08	TRUE	2.30585	8.73273e-05	TRUE	3.11968	2.48525e-12	TRUE	-0.40465	0.474831	FALSE	0.409185	0.504474	FALSE	0.813834	0.0154375	FALSE
chr3_51747844_51748168	chr3	51747844	51748168	+	Intergenic	31181	440956	IQCF6	2.27113	0.00414822	TRUE	0.693987	0.698409	FALSE	3.11959	4.79419e-07	TRUE	-1.57714	0.0340957	TRUE	0.848464	0.2671	FALSE	2.42561	2.65913e-06	TRUE
chr17_3969261_3969427	chr17	3969261	3969427	+	Intergenic	-4880	489	ATP2A3	2.87442	3.0055e-05	TRUE	0.694781	0.698429	FALSE	3.11871	5.41405e-07	TRUE	-2.17964	0.000216406	TRUE	0.244281	0.802938	FALSE	2.42392	3.09332e-06	TRUE
chr7_29053147_29053459	chr7	29053147	29053459	+	intron (NM_001348054, intron 12 of 13)	-71730	101928168	LOC101928168	2.71663	0.00116517	TRUE	0.521483	0.822445	FALSE	3.09567	2.08578e-05	TRUE	-2.19515	0.00363456	TRUE	0.379042	0.732584	FALSE	2.57419	4.33877e-05	TRUE
chr8_85296430_85296733	chr8	85296430	85296733	+	Intergenic	45133	759	CA1	2.70076	2.27492e-05	TRUE	2.0595	0.0160659	TRUE	3.2104	1.41737e-08	TRUE	-0.641265	0.356472	FALSE	0.509639	0.528742	FALSE	1.1509	0.00966855	TRUE
chr4_68249452_68249847	chr4	68249452	68249847	+	Intergenic	-3955	132724	TMPRSS11B	2.82311	2.8072e-07	TRUE	1.05479	0.315157	FALSE	3.11523	9.74735e-10	TRUE	-1.76832	0.000151649	TRUE	0.292118	0.732964	FALSE	2.06044	9.38413e-07	TRUE
chr17_8621636_8622068	chr17	8621636	8622068	+	intron (NM_005964, intron 2 of 40)	8909	4628	MYH10	3.21794	2.07397e-11	TRUE	1.94981	0.00628723	TRUE	3.11489	3.94179e-11	TRUE	-1.26812	0.00054366	TRUE	-0.103044	0.900252	FALSE	1.16508	0.00100347	TRUE
chr12_116537429_116537601	chr12	116537429	116537601	+	Intergenic	4080	100287569	LINC00173	3.07721	3.56418e-07	TRUE	1.71545	0.0887139	FALSE	3.11434	5.68599e-08	TRUE	-1.36176	0.0045672	TRUE	0.0371332	0.974548	FALSE	1.3989	0.00131188	TRUE
chr9_106964356_106964620	chr9	106964356	106964620	+	intron (NM_001347997, intron 7 of 12)	101391	58499	ZNF462	3.28479	4.06504e-07	TRUE	-0.426257	0.863043	FALSE	3.11423	1.1342e-06	TRUE	-3.71104	3.70924e-09	TRUE	-0.170555	0.868555	FALSE	3.54049	1.50422e-08	TRUE
chr16_75317257_75317595	chr16	75317257	75317595	+	intron (NM_006324, intron 5 of 6)	-49373	9564	BCAR1	2.69786	0.000180391	TRUE	1.21103	0.381636	FALSE	2.86982	1.22121e-05	TRUE	-1.48683	0.0167529	TRUE	0.171951	0.882089	FALSE	1.65878	0.00171015	TRUE
chr22_39116048_39116287	chr22	39116048	39116287	+	Intergenic	18943	164668	APOBEC3H	2.72396	3.57733e-05	TRUE	1.36537	0.24062	FALSE	3.1127	1.04231e-07	TRUE	-1.35859	0.0169153	TRUE	0.388738	0.652881	FALSE	1.74732	0.000143624	TRUE
chr2_202703181_202703431	chr2	202703181	202703431	+	intron (NM_173511, intron 2 of 7)	68128	150864	FAM117B	2.69756	0.000132742	TRUE	-0.421689	0.863114	FALSE	3.29425	2.20276e-08	TRUE	-3.11925	6.20418e-06	TRUE	0.596688	0.409292	FALSE	3.71594	8.02194e-11	TRUE
chr2_36858476_36858786	chr2	36858476	36858786	+	intron (NM_003162, intron 13 of 17)	107841	6801	STRN	2.69726	1.9742e-06	TRUE	0.202128	0.912832	FALSE	2.12023	0.000424263	TRUE	-2.49513	1.17885e-06	TRUE	-0.577021	0.457859	FALSE	1.91811	0.000619765	TRUE
chr7_45160434_45160632	chr7	45160434	45160632	+	intron (NM_005856, intron 1 of 2)	2765	10268	RAMP3	2.44571	0.00137395	TRUE	1.89241	0.0754007	FALSE	3.11117	6.89235e-07	TRUE	-0.553292	0.534341	FALSE	0.665467	0.413576	FALSE	1.21876	0.00959805	TRUE
chr4_108972875_108973365	chr4	108972875	108973365	+	intron (NM_001256074, intron 6 of 31)	-210041	64850	ETNPPL	2.69684	7.36198e-06	TRUE	3.62045	5.357e-12	TRUE	3.3576	5.84176e-11	TRUE	0.923614	0.0165623	FALSE	0.66076	0.295845	FALSE	-0.262853	0.499394	FALSE
chr5_135965012_135965305	chr5	135965012	135965305	+	Intergenic	-10124	3950	LECT2	2.69643	0.000176929	TRUE	1.81811	0.095592	FALSE	2.83392	1.72989e-05	TRUE	-0.878312	0.194032	FALSE	0.137491	0.905385	FALSE	1.0158	0.0499525	TRUE
chr16_56119249_56119495	chr16	56119249	56119495	+	intron (NR_027078, intron 2 of 4)	71722	283856	LOC283856	2.31544	0.000943489	TRUE	1.19262	0.311703	FALSE	3.10898	1.25811e-07	TRUE	-1.12282	0.106881	FALSE	0.793544	0.327273	FALSE	1.91636	8.18468e-05	TRUE
chr12_110791680_110792014	chr12	110791680	110792014	+	Intergenic	-48869	5501	PPP1CC	2.85243	5.90851e-07	TRUE	0.853795	0.511525	FALSE	3.1077	2.50926e-09	TRUE	-1.99863	2.6996e-05	TRUE	0.255274	0.752703	FALSE	2.25391	1.09859e-07	TRUE
chr12_31477773_31477940	chr12	31477773	31477940	+	intron (NM_144973, intron 3 of 20)	-108555	101929027	LINC02387	2.31293	0.0107557	TRUE	-0.414091	0.884297	FALSE	3.10663	1.22438e-05	TRUE	-2.72702	0.0029635	TRUE	0.793705	0.384743	FALSE	3.52072	3.99854e-07	TRUE
chr5_169657167_169657455	chr5	169657167	169657455	+	intron (NM_004946, intron 2 of 51)	20064	1794	DOCK2	2.69604	8.08665e-08	TRUE	-0.0272406	0.98826	FALSE	2.6115	9.1719e-08	TRUE	-2.72329	4.91096e-09	TRUE	-0.0845463	0.929094	FALSE	2.63874	6.63644e-09	TRUE
chr1_48785993_48786243	chr1	48785993	48786243	+	intron (NR_136623, intron 5 of 12)	-9149	79656	BEND5	2.69515	0.000189874	TRUE	0.693273	0.699952	FALSE	3.79464	8.31966e-12	TRUE	-2.00188	0.00152719	TRUE	1.0995	0.0621116	FALSE	3.10137	1.2214e-11	TRUE
chr10_21953574_21953772	chr10	21953574	21953772	+	intron (NM_022365, intron 1 of 11)	50048	64215	DNAJC1	2.05377	0.033731	TRUE	1.08497	0.52605	FALSE	3.10502	1.10795e-05	TRUE	-0.968801	0.367754	FALSE	1.05125	0.23222	FALSE	2.02005	0.000362858	TRUE
chr5_138372322_138372507	chr5	138372322	138372507	+	intron (NM_016604, intron 1 of 23)	19818	51780	KDM3B	2.83724	0.000342397	TRUE	0.52199	0.821134	FALSE	3.10408	1.01628e-05	TRUE	-2.31525	0.000893964	TRUE	0.266834	0.806849	FALSE	2.58209	1.85178e-05	TRUE
chr16_10370202_10370835	chr16	10370202	10370835	+	Intergenic	-15481	80063	ATF7IP2	2.6944	3.49077e-07	TRUE	0.459632	0.738163	FALSE	3.09012	1.55255e-10	TRUE	-2.23477	1.90977e-06	TRUE	0.395717	0.590089	FALSE	2.63048	5.38715e-10	TRUE
chr1_223667833_223668059	chr1	223667833	223668059	+	Intergenic	-2212	388743	CAPN8	2.38955	0.00685006	TRUE	0.734911	0.71886	FALSE	3.10404	1.01628e-05	TRUE	-1.65464	0.0467407	TRUE	0.714488	0.431456	FALSE	2.36913	5.31089e-05	TRUE
chr4_102988651_102988932	chr4	102988651	102988932	+	intron (NM_001100874, intron 3 of 11)	30948	150159	SLC9B1	2.94321	0.000137386	TRUE	-0.93686	0.721738	FALSE	3.10402	1.01628e-05	TRUE	-3.88007	1.61697e-06	TRUE	0.160815	0.89122	FALSE	4.04088	4.83434e-08	TRUE
chr22_42919264_42919500	chr22	42919264	42919500	+	intron (NM_001349971, intron 1 of 10)	27659	11252	PACSIN2	2.68477	0.00839494	TRUE	1.62277	0.347108	FALSE	3.72136	1.11738e-06	TRUE	-1.062	0.296092	FALSE	1.03659	0.234059	FALSE	2.09859	0.000197894	TRUE
chr9_91359165_91359325	chr9	91359165	91359325	+	intron (NM_001306190, intron 1 of 8)	2679	549	AUH	2.53221	0.00299317	TRUE	-0.413596	0.884175	FALSE	3.10401	1.01628e-05	TRUE	-2.94581	0.00050691	TRUE	0.571796	0.539411	FALSE	3.5176	3.02752e-07	TRUE
chr15_48966725_48966871	chr15	48966725	48966871	+	Intergenic	-3354	399694	SHC4	2.46266	0.00455692	TRUE	1.8038	0.157388	FALSE	3.10401	1.01628e-05	TRUE	-0.658859	0.498346	FALSE	0.641348	0.482826	FALSE	1.30021	0.013965	TRUE
chr5_73799493_73799840	chr5	73799493	73799840	+	intron (NM_001080479, intron 9 of 36)	-13852	64283	ARHGEF28	2.68344	0.00788637	TRUE	0.124816	0.970887	FALSE	3.41476	2.01126e-05	TRUE	-2.55863	0.00808465	TRUE	0.731318	0.461584	FALSE	3.28995	5.64646e-06	TRUE
chr6_144155701_144155813	chr6	144155701	144155813	+	intron (NM_003764, intron 1 of 1)	5240	8676	STX11	1.73707	0.099573	FALSE	1.23232	0.441692	FALSE	3.1039	1.01641e-05	TRUE	-0.504756	0.731289	FALSE	1.36683	0.113164	FALSE	1.87158	0.000733797	TRUE
chr2_146228736_146229056	chr2	146228736	146229056	+	Intergenic	-358161	728773	PABPC1P2	1.61416	0.140548	FALSE	1.89522	0.125773	FALSE	3.10388	1.01641e-05	TRUE	0.281066	0.855159	FALSE	1.48972	0.0841993	FALSE	1.20866	0.0218016	TRUE
chr5_100771276_100771491	chr5	100771276	100771491	+	Intergenic	45182	100302288	MIR548P	2.68343	0.00788637	TRUE	0.810467	0.741156	FALSE	3.41476	2.01126e-05	TRUE	-1.87296	0.0450344	TRUE	0.731332	0.461584	FALSE	2.6043	8.06283e-05	TRUE
chr21_38773285_38773578	chr21	38773285	38773578	+	promoter-TSS (NR_027065)	46	400866	LINC00114	2.31139	0.000355279	TRUE	1.74053	0.0508173	FALSE	3.10181	3.70203e-09	TRUE	-0.570859	0.43728	FALSE	0.790419	0.224646	FALSE	1.36128	0.000567941	TRUE
chr21_25357354_25357716	chr21	25357354	25357716	+	Intergenic	74166	54072	LINC00158	2.68179	2.253e-05	TRUE	-0.426196	0.845196	FALSE	2.5644	2.95315e-05	TRUE	-3.10798	4.93441e-07	TRUE	-0.117387	0.91338	FALSE	2.9906	7.23808e-07	TRUE
chr1_206662747_206662928	chr1	206662747	206662928	+	Intergenic	-22183	9261	MAPKAPK2	2.68141	0.00835807	TRUE	1.6222	0.346635	FALSE	3.59976	3.91595e-06	TRUE	-1.05921	0.295837	FALSE	0.91835	0.319151	FALSE	1.97756	0.00065603	TRUE
chr19_29978184_29978408	chr19	29978184	29978408	+	intron (NM_003796, intron 2 of 10)	36057	8725	URI1	2.22921	0.0166788	TRUE	0.73532	0.720054	FALSE	3.10007	1.50762e-05	TRUE	-1.49389	0.104696	FALSE	0.870855	0.345318	FALSE	2.36475	8.33629e-05	TRUE
chr10_14390234_14390589	chr10	14390234	14390589	+	Intergenic	-7134	100422843	MIR4293	2.56927	1.63722e-08	TRUE	1.59403	0.0132035	TRUE	3.09989	3.83671e-14	TRUE	-0.97524	0.0167514	FALSE	0.530622	0.35593	FALSE	1.50586	3.35637e-06	TRUE
chr22_25623388_25623586	chr22	25623388	25623586	+	intron (NM_005160, intron 2 of 20)	58593	157	GRK3	3.04055	7.00657e-05	TRUE	1.48703	0.305638	FALSE	3.09947	1.41709e-05	TRUE	-1.55352	0.0132256	TRUE	0.0589182	0.964635	FALSE	1.61244	0.00360754	TRUE
chr6_36695526_36695746	chr6	36695526	36695746	+	Intergenic	-2215	401258	RAB44	2.64662	5.12276e-05	TRUE	1.58495	0.130726	FALSE	3.09895	4.92371e-08	TRUE	-1.06168	0.0676896	FALSE	0.452328	0.562141	FALSE	1.51401	0.000451426	TRUE
chr5_143020239_143020481	chr5	143020239	143020481	+	intron (NR_146198, intron 12 of 22)	-151450	100874239	ARHGAP26-AS1	2.1915	0.00232713	TRUE	1.19618	0.325766	FALSE	3.09863	3.14289e-08	TRUE	-0.995318	0.163663	FALSE	0.90713	0.183007	FALSE	1.90245	1.33748e-05	TRUE
chr15_52236028_52236217	chr15	52236028	52236217	+	intron (NM_018728, intron 22 of 40)	41078	100302202	MIR1266	2.68046	3.09417e-05	TRUE	1.19601	0.326841	FALSE	2.67467	1.16635e-05	TRUE	-1.48445	0.00632077	TRUE	-0.00578432	0.996254	FALSE	1.47866	0.00292014	TRUE
chr10_70162801_70163144	chr10	70162801	70163144	+	intron (NM_001142648, intron 1 of 7)	7557	56681	SAR1A	3.10224	2.88663e-07	TRUE	0.388963	0.841328	FALSE	3.09694	8.84817e-08	TRUE	-2.71328	2.81778e-07	TRUE	-0.0052996	0.996322	FALSE	2.70798	8.3758e-08	TRUE
chr5_160539484_160539966	chr5	160539484	160539966	+	Intergenic	54373	406938	MIR146A	2.67998	1.61792e-06	TRUE	1.32908	0.154581	FALSE	3.1761	2.26142e-10	TRUE	-1.3509	0.00536094	TRUE	0.496124	0.485725	FALSE	1.84702	4.04756e-06	TRUE
chr2_218582133_218582411	chr2	218582133	218582411	+	intron (NM_001271634, intron 2 of 8)	13692	9125	CNOT9	2.67818	4.91638e-05	TRUE	1.10333	0.391463	FALSE	3.41337	5.85134e-10	TRUE	-1.57485	0.0054014	TRUE	0.735198	0.269209	FALSE	2.31004	1.06414e-07	TRUE
chr8_90626440_90626617	chr8	90626440	90626617	+	intron (NM_001146273, intron 1 of 1)	19377	169200	TMEM64	1.83394	0.0192427	TRUE	0.533922	0.757225	FALSE	3.09575	2.08555e-08	TRUE	-1.30002	0.102755	FALSE	1.26181	0.0530812	FALSE	2.56183	4.01906e-08	TRUE
chr2_25102360_25102666	chr2	25102360	25102666	+	intron (NM_001319099, intron 3 of 22)	60050	22979	EFR3B	2.67801	0.00911856	TRUE	1.62331	0.349584	FALSE	3.80345	6.13422e-07	TRUE	-1.05469	0.308771	FALSE	1.12544	0.193201	FALSE	2.18014	0.00010971	TRUE
chr14_49992968_49993321	chr14	49992968	49993321	+	promoter-TSS (NR_126499)	-10	283551	LINC01588	2.67701	1.7125e-05	TRUE	1.8396	0.0393269	TRUE	3.43005	8.78832e-11	TRUE	-0.837408	0.163511	FALSE	0.753045	0.251698	FALSE	1.59045	5.9823e-05	TRUE
chr13_99041863_99042193	chr13	99041863	99042193	+	intron (NM_001130049, intron 1 of 32)	44378	23348	DOCK9	2.6721	1.42272e-06	TRUE	1.659	0.0432973	TRUE	2.96199	6.42658e-09	TRUE	-1.0131	0.0439122	TRUE	0.289887	0.736474	FALSE	1.30299	0.00141857	TRUE
chr16_57314338_57314742	chr16	57314338	57314742	+	Intergenic	-29868	51090	PLLP	2.92422	6.47813e-07	TRUE	0.639926	0.654493	FALSE	3.09499	2.31206e-08	TRUE	-2.2843	9.20113e-06	TRUE	0.170762	0.870783	FALSE	2.45506	3.23615e-07	TRUE
chr2_195544566_195544847	chr2	195544566	195544847	+	Intergenic	-112102	57181	SLC39A10	2.37904	0.00398187	TRUE	2.13466	0.0410533	TRUE	3.09455	6.42513e-06	TRUE	-0.244371	0.84787	FALSE	0.715516	0.4553	FALSE	0.959887	0.0829967	FALSE
chr8_124601816_124602026	chr8	124601816	124602026	+	intron (NM_014751, intron 3 of 13)	62819	4715	NDUFB9	2.67072	5.31247e-06	TRUE	1.18634	0.281598	FALSE	2.19595	0.000345029	TRUE	-1.48438	0.00239467	TRUE	-0.474774	0.554842	FALSE	1.00961	0.0569589	FALSE
chr1_165875311_165875509	chr1	165875311	165875509	+	intron (NM_012474, intron 1 of 6)	-32511	100500832	MIR3658	2.66762	1.9673e-07	TRUE	2.18643	0.00049299	TRUE	2.84411	3.01173e-09	TRUE	-0.48119	0.402231	FALSE	0.176498	0.839773	FALSE	0.657687	0.0940321	FALSE
chr21_42421194_42421362	chr21	42421194	42421362	+	intron (NM_001001895, intron 6 of 13)	17416	53347	UBASH3A	2.66202	0.00126826	TRUE	1.8952	0.125773	FALSE	3.22506	2.58486e-06	TRUE	-0.766818	0.36103	FALSE	0.563045	0.522835	FALSE	1.32986	0.0083524	TRUE
chr11_36395029_36395228	chr11	36395029	36395228	+	intron (NM_024841, intron 2 of 9)	-5869	79899	PRR5L	2.32962	0.00323326	TRUE	3.07194	2.40202e-05	TRUE	3.09245	1.15117e-06	TRUE	0.742322	0.231675	FALSE	0.762826	0.354398	FALSE	0.0205045	0.974793	FALSE
chr1_67190023_67190232	chr1	67190023	67190232	+	intron (NM_144701, intron 4 of 10)	23641	149233	IL23R	2.89102	0.000100015	TRUE	2.53914	0.00594753	TRUE	3.09169	5.98036e-06	TRUE	-0.351877	0.723711	FALSE	0.200678	0.869867	FALSE	0.552555	0.332928	FALSE
chr1_64956355_64956502	chr1	64956355	64956502	+	intron (NM_001321852, intron 1 of 24)	10141	3716	JAK1	2.56562	0.000191694	TRUE	1.98729	0.0332127	TRUE	3.09122	1.85541e-07	TRUE	-0.57833	0.45754	FALSE	0.525591	0.522815	FALSE	1.10392	0.0159445	TRUE
chr8_125125647_125125881	chr8	125125647	125125881	+	intron (NR_146192, intron 3 of 5)	33941	286053	NSMCE2	2.66158	0.00143907	TRUE	0.522759	0.821448	FALSE	3.29757	1.5473e-06	TRUE	-2.13882	0.00459005	TRUE	0.635982	0.464527	FALSE	2.77481	2.15853e-06	TRUE
chr6_47358550_47358780	chr6	47358550	47358780	+	Intergenic	-48718	27242	TNFRSF21	2.65886	1.44761e-05	TRUE	1.10228	0.34539	FALSE	2.0943	0.00121283	TRUE	-1.55658	0.00300809	TRUE	-0.564566	0.50347	FALSE	0.992017	0.0865968	FALSE
chr3_69435657_69436165	chr3	69435657	69436165	+	Intergenic	-49607	23150	FRMD4B	2.88411	5.41841e-09	TRUE	1.17256	0.196141	FALSE	3.08888	2.65398e-11	TRUE	-1.71155	2.4837e-05	TRUE	0.204769	0.796359	FALSE	1.91632	2.42975e-07	TRUE
chr8_99774873_99775160	chr8	99774873	99775160	+	intron (NM_017890, intron 40 of 61)	118998	1345	COX6C	2.65704	0.000446013	TRUE	-0.802355	0.730706	FALSE	3.27055	3.54523e-07	TRUE	-3.45939	9.38755e-06	TRUE	0.613514	0.47731	FALSE	4.07291	7.84709e-10	TRUE
chr1_76270524_76270708	chr1	76270524	76270708	+	intron (NM_001349108, intron 1 of 3)	195932	256435	ST6GALNAC3	2.68097	3.53766e-05	TRUE	0.667589	0.678894	FALSE	3.08755	5.69157e-08	TRUE	-2.01338	0.000333941	TRUE	0.406575	0.612306	FALSE	2.41996	3.72519e-07	TRUE
chr8_98364997_98365252	chr8	98364997	98365252	+	Intergenic	-61898	3788	KCNS2	1.99037	0.00558422	TRUE	1.45654	0.154017	FALSE	3.08544	2.43763e-08	TRUE	-0.533824	0.561369	FALSE	1.09507	0.111537	FALSE	1.62889	0.000182105	TRUE
chr1_172725419_172725633	chr1	172725419	172725633	+	Intergenic	66518	356	FASLG	1.75371	0.0521062	FALSE	1.09732	0.447026	FALSE	3.08421	6.12113e-07	TRUE	-0.656393	0.567128	FALSE	1.33049	0.073815	FALSE	1.98689	4.94751e-05	TRUE
chr11_102882659_102883011	chr11	102882659	102883011	+	Intergenic	-7801	4321	MMP12	2.31855	0.000458636	TRUE	1.32993	0.212165	FALSE	3.08405	1.54713e-08	TRUE	-0.988615	0.125495	FALSE	0.765502	0.275434	FALSE	1.75412	4.44715e-05	TRUE
chr10_68163772_68164101	chr10	68163772	68164101	+	intron (NM_001256267, intron 9 of 20)	54503	84665	MYPN	2.13117	0.00164218	TRUE	1.63271	0.0802537	FALSE	3.08383	6.21352e-09	TRUE	-0.498458	0.5526	FALSE	0.952667	0.144638	FALSE	1.45113	0.000318237	TRUE
chr19_6038635_6039011	chr19	6038635	6039011	+	intron (NM_000635, intron 5 of 17)	60420	100128568	LOC100128568	2.58006	1.12801e-07	TRUE	2.08569	0.000487534	TRUE	3.0832	8.90453e-13	TRUE	-0.494371	0.347995	FALSE	0.503134	0.384594	FALSE	0.997505	0.00220867	FALSE
chr1_235873094_235873450	chr1	235873094	235873450	+	intron (NM_001301365, intron 1 of 52)	-6345	1130	LYST	2.6562	3.22026e-10	TRUE	1.31214	0.0492271	TRUE	2.77403	5.46675e-12	TRUE	-1.34406	0.000135663	TRUE	0.117837	0.883525	FALSE	1.46189	6.77591e-06	TRUE
chr17_27810358_27810513	chr17	27810358	27810513	+	Intergenic	-9906	4843	NOS2	2.55173	0.000504773	TRUE	0.975115	0.52369	FALSE	3.08301	5.78758e-07	TRUE	-1.57661	0.0144867	TRUE	0.531286	0.509754	FALSE	2.1079	2.06898e-05	TRUE
chr14_34043823_34044152	chr14	34043823	34044152	+	Intergenic	-92909	112399	EGLN3	2.65507	2.74952e-05	TRUE	1.10797	0.35219	FALSE	3.06674	5.84272e-08	TRUE	-1.54709	0.00516642	TRUE	0.411672	0.631062	FALSE	1.95877	2.23928e-05	TRUE
chr1_178376041_178376345	chr1	178376041	178376345	+	intron (NM_004841, intron 1 of 15)	34722	9462	RASAL2	2.65132	0.000215839	TRUE	-0.804702	0.725147	FALSE	2.98194	2.19713e-06	TRUE	-3.45602	2.86376e-06	TRUE	0.330623	0.72853	FALSE	3.78665	5.91053e-09	TRUE
chr18_23987060_23987332	chr18	23987060	23987332	+	Intergenic	-5577	125488	TTC39C	1.75384	0.0512139	FALSE	1.59	0.17345	FALSE	3.08234	5.04945e-07	TRUE	-0.163833	0.913241	FALSE	1.3285	0.0692961	FALSE	1.49234	0.0012164	TRUE
chr14_70802485_70802752	chr14	70802485	70802752	+	intron (NM_001284230, intron 1 of 11)	6553	4293	MAP3K9	2.33162	0.002505	TRUE	0.130773	0.957902	FALSE	3.08225	5.05322e-07	TRUE	-2.20085	0.00245745	TRUE	0.750627	0.326736	FALSE	2.95148	8.4334e-08	TRUE
chr6_119313025_119313252	chr6	119313025	119313252	+	intron (NM_005907, intron 2 of 12)	36628	4121	MAN1A1	2.73692	3.6616e-06	TRUE	2.05926	0.0100498	TRUE	3.08187	6.03263e-09	TRUE	-0.677666	0.237818	FALSE	0.34495	0.658448	FALSE	1.02262	0.0100663	TRUE
chr18_69978813_69979116	chr18	69978813	69979116	+	Intergenic	-21788	10666	CD226	2.8773	5.4323e-07	TRUE	2.01832	0.0130547	TRUE	3.08187	5.99963e-09	TRUE	-0.858978	0.0869779	FALSE	0.204576	0.816209	FALSE	1.06355	0.00741787	TRUE
chr13_42392773_42393022	chr13	42392773	42393022	+	Intergenic	-31995	105370177	LINC02341	2.64975	0.000337574	TRUE	1.50336	0.226612	FALSE	3.36533	3.57004e-08	TRUE	-1.14639	0.0880788	FALSE	0.71558	0.347019	FALSE	1.86197	5.80413e-05	TRUE
chr17_42655981_42656495	chr17	42655981	42656495	+	Intergenic	-3010	27175	TUBG2	2.64622	5.58207e-13	TRUE	1.20181	0.0350132	TRUE	3.04059	6.2258e-19	TRUE	-1.44442	3.09144e-06	TRUE	0.394366	0.440548	FALSE	1.83878	6.28411e-11	TRUE
chr17_10266490_10266999	chr17	10266490	10266999	+	Intergenic	-68193	8522	GAS7	2.3234	4.90618e-05	TRUE	2.53712	2.03953e-05	TRUE	3.08083	1.29093e-10	TRUE	0.213719	0.794306	FALSE	0.757431	0.213172	FALSE	0.543712	0.15342	FALSE
chr6_52161802_52162079	chr6	52161802	52162079	+	Intergenic	-10917	101154644	LINCMD1	2.64387	8.4164e-05	TRUE	1.19518	0.33715	FALSE	3.5423	1.04741e-10	TRUE	-1.44868	0.0135992	TRUE	0.898433	0.165299	FALSE	2.34712	4.54032e-08	TRUE
chr2_191109942_191110193	chr2	191109942	191110193	+	intron (NM_003151, intron 3 of 23)	41193	6775	STAT4	2.64364	3.14422e-05	TRUE	-0.17665	0.938857	FALSE	2.74191	3.15043e-06	TRUE	-2.82029	2.56965e-06	TRUE	0.0982734	0.92605	FALSE	2.91856	1.45546e-07	TRUE
chr19_6678648_6678935	chr19	6678648	6678935	+	intron (NM_000064, intron 38 of 40)	-8203	8740	TNFSF14	2.64299	5.73219e-05	TRUE	3.01094	3.48991e-06	TRUE	2.87161	1.41948e-06	TRUE	0.367953	0.602931	FALSE	0.228623	0.820165	FALSE	-0.139331	0.791722	FALSE
chr5_171906992_171907475	chr5	171906992	171907475	+	intron (NM_012300, intron 3 of 12)	99640	23291	FBXW11	2.62659	2.31275e-09	TRUE	0.284397	0.826803	FALSE	3.07816	7.28501e-15	TRUE	-2.34219	2.22541e-09	TRUE	0.451566	0.399319	FALSE	2.79376	1.55765e-15	TRUE
chr1_206609207_206609943	chr1	206609207	206609943	+	intron (NM_001201478, intron 2 of 12)	2976	1939	EIF2D	2.6423	1.80375e-13	TRUE	1.70408	0.000256089	TRUE	2.68968	6.14251e-15	TRUE	-0.938216	0.00191527	FALSE	0.0473776	0.951259	FALSE	0.985594	0.000370032	FALSE
chr3_108898008_108898201	chr3	108898008	108898201	+	Intergenic	55726	9626	GUCA1C	2.88966	8.76488e-06	TRUE	0.223251	0.917326	FALSE	3.07585	3.42701e-07	TRUE	-2.66641	5.79359e-06	TRUE	0.186188	0.860464	FALSE	2.85259	1.45049e-07	TRUE
chr17_75313841_75314227	chr17	75313841	75314227	+	Intergenic	-24585	60386	SLC25A19	2.64229	7.24488e-09	TRUE	1.44521	0.03776	TRUE	2.88268	1.14245e-11	TRUE	-1.19708	0.00203046	TRUE	0.240389	0.742135	FALSE	1.43747	2.2064e-05	TRUE
chr8_30724181_30724366	chr8	30724181	30724366	+	intron (NM_001195103, intron 1 of 11)	3726	2936	GSR	2.13588	0.000578619	TRUE	1.1159	0.285364	FALSE	3.07306	3.46952e-10	TRUE	-1.01998	0.0880467	FALSE	0.937183	0.109481	FALSE	1.95717	4.04042e-07	TRUE
chr1_207097835_207098164	chr1	207097835	207098164	+	intron (NM_001017364, intron 4 of 5)	-6263	722	C4BPA	2.64156	1.12958e-05	TRUE	0.853728	0.513312	FALSE	3.15072	1.65015e-09	TRUE	-1.78783	0.000502559	TRUE	0.509161	0.460121	FALSE	2.29699	7.08617e-08	TRUE
chr1_144940106_144940426	chr1	144940106	144940426	+	intron (NM_001271870, intron 3 of 8)	153096	647135	SRGAP2B	2.88966	1.05928e-13	TRUE	1.54081	0.00892451	TRUE	3.072	4.18998e-17	TRUE	-1.34885	8.91357e-06	TRUE	0.182347	0.764235	FALSE	1.5312	3.39423e-08	TRUE
chr2_128624034_128624311	chr2	128624034	128624311	+	Intergenic	-240428	101927881	LOC101927881	2.49672	0.00102418	TRUE	1.58964	0.182416	FALSE	3.0718	1.39957e-06	TRUE	-0.907084	0.228333	FALSE	0.575081	0.500714	FALSE	1.48216	0.00252825	TRUE
chr6_159931059_159931513	chr6	159931059	159931513	+	Intergenic	24344	4142	MAS1	2.6016	1.23727e-08	TRUE	1.11866	0.156566	FALSE	3.07097	1.04222e-13	TRUE	-1.48294	0.000117587	TRUE	0.46937	0.418461	FALSE	1.95232	5.24934e-09	TRUE
chr18_10524783_10524969	chr18	10524783	10524969	+	promoter-TSS (NM_003826)	-1000	8774	NAPG	2.64151	5.78047e-05	TRUE	1.51029	0.161685	FALSE	2.7472	6.52598e-06	TRUE	-1.13122	0.0510784	FALSE	0.105682	0.925354	FALSE	1.2369	0.0111626	TRUE
chr21_25187607_25187954	chr21	25187607	25187954	+	Intergenic	243921	54072	LINC00158	2.64065	2.50909e-06	TRUE	1.04983	0.315219	FALSE	3.02377	2.57144e-09	TRUE	-1.59082	0.00103336	TRUE	0.383122	0.62567	FALSE	1.97395	2.2995e-06	TRUE
chr4_81508886_81509078	chr4	81508886	81509078	+	Intergenic	-37054	153020	RASGEF1B	2.64051	0.000107838	TRUE	0.219933	0.918552	FALSE	3.25105	2.77284e-08	TRUE	-2.42058	0.000101874	TRUE	0.610541	0.436336	FALSE	3.03112	7.47927e-09	TRUE
chr2_190502071_190502371	chr2	190502071	190502371	+	TTS (NM_017694)	32521	100131211	NEMP2	2.63734	7.62537e-06	TRUE	0.132438	0.94903	FALSE	2.6474	2.16708e-06	TRUE	-2.5049	2.83602e-06	TRUE	0.010061	0.992438	FALSE	2.51496	6.82467e-07	TRUE
chr3_18237379_18237681	chr3	18237379	18237681	+	intron (NM_001257177, intron 4 of 4)	187807	6304	SATB1	2.50424	4.40151e-06	TRUE	0.537463	0.690263	FALSE	3.06534	9.98025e-11	TRUE	-1.96677	3.97651e-05	TRUE	0.561101	0.373606	FALSE	2.52788	4.34136e-10	TRUE
chr10_62671115_62671510	chr10	62671115	62671510	+	3' UTR (NM_199452, exon 7 of 7)	-133444	84890	ADO	2.63333	2.60149e-07	TRUE	-0.434478	0.796135	FALSE	2.21363	2.87927e-05	TRUE	-3.0678	7.89289e-10	TRUE	-0.419699	0.552083	FALSE	2.6481	3.90438e-07	TRUE
chr8_55972286_55972477	chr8	55972286	55972477	+	intron (NM_001111097, intron 10 of 12)	-69526	109617001	SNORA1B	2.89077	0.000249861	TRUE	2.58602	0.00857261	TRUE	3.06249	1.93638e-05	TRUE	-0.304755	0.763468	FALSE	0.17172	0.888554	FALSE	0.476475	0.39323	FALSE
chr1_228794171_228794566	chr1	228794171	228794566	+	Intergenic	59291	58480	RHOU	2.63056	2.70292e-06	TRUE	1.11218	0.290118	FALSE	2.54361	2.79808e-06	TRUE	-1.51838	0.00128714	TRUE	-0.0869473	0.932712	FALSE	1.43143	0.00145981	TRUE
[truncated: 14,290 more rows]
